# Supplementary material
Source: PubMed Central journal article supplement (PMC4624264)
Supplement: NIHMS65692-supplement-Web_Appendix.pdf [file NIHMS65692-supplement-Web_Appendix.pdf]

## **Appendix to Global, regional, and national prevalence of overweight and obesity in children and adults during 1980-2013: a systematic analysis for the Global Burden of Disease Study 2013**

---

This appendix provides supplemental information on methods and supplemental tables and figures to support the material in the main paper. It is divided into six sections.

### **Table of Contents**

|                                                                                          |    |
|------------------------------------------------------------------------------------------|----|
| Section 1. Survey and Report Data.....                                                   | 2  |
| Section 2. Literature Review.....                                                        | 3  |
| Section 3. Definition of Childhood Overweight and Obesity.....                           | 3  |
| Section 4. Bias Adjustment.....                                                          | 4  |
| Section 5. Estimating Prevalence of Obesity and Overweight for Different Age Groups..... | 7  |
| Section 6. Prevalence Estimation using Gaussian Process Regression.....                  | 7  |
| Section 7. Cross-Validation.....                                                         | 11 |
| Section 8 Sensitivity Analysis.....                                                      | 12 |

## Section 1. Survey and Report Data

Micro survey data which provide information on height and weight were identified. Both self-report and measured data were considered. Major multi-country survey programs included in the analysis are the Demographic and Health Surveys (DHS),<sup>1</sup> the WHO STEPwise approach to Surveillance (STEPS) program,<sup>2</sup> the Eurobarometer Surveys,<sup>3</sup> the Multiple Indicator Cluster Surveys (MICS),<sup>4</sup> the World Health Surveys (WHS),<sup>5</sup> the Reproductive Health Surveys (RHS),<sup>6</sup> the Survey of Health Ageing and Retirement in Europe (SHARE),<sup>7</sup> and the International Social Survey Programmed (ISSP).<sup>8</sup> In addition, a comprehensive search to identify other national surveys and longitudinal studies was conducted via major databases including – the WHO Global Infobase,<sup>9</sup> the International Association for the Study of Obesity Obesity Data Portal,<sup>10</sup> and the Global Health Data Exchange (GHDx),<sup>11</sup> and was supplemented with a targeted Google search as well as searches on websites of national health ministries. Webtable 1 presents the number of data points for 21 GBD regions by decade. A comprehensive data source list with all data used in the current study is provided in Webtable 7.

For surveys where the micro data were available, we computed body-mass index using height and weight. We then applied the International Obesity Task Force criteria (see Section III) to determine the status of overweight and obesity for individuals under the age of 18 years. For individuals above the age of 18 years, we applied the cutoff of  $25 \leq \text{BMI} < 30$  for overweight and  $\text{BMI} \geq 30$  for obese. Survey weights, whenever available, were applied to obtain the weighted national estimates. In addition to prevalence estimates, we extracted other details including sample size, standard error, urbanicity and reporting mechanism -- whether height and weight were measured or self-reported. All data points with sample sizes below 100 were carefully reviewed in order to ensure that extreme observations driven by small samples would not influence the accuracy of our analysis. Data points from surveys with high level of missingness caused by incomplete entries on height and weight (>15%) were excluded. Standard errors extracted from the survey were incorporated in subsequent analytical steps to capture uncertainty in the raw data. Urbanicity information was used to identify the extent to which the data were nationally representative. Previous studies have pointed out differences between urban and national estimates, and rural and national estimates.<sup>12-14</sup> In order to determine the appropriateness of including urban or rural only studies, we reviewed all urban and rural data points with reference to the urbanicity level of the country as defined in World Urbanization Prospect.<sup>15</sup> In general, data points based on multiple country sites were included if the sample was representative of the general population; for example, the VIGITEL in Brazil and the Australian Risk Factor Prevalence Study. Furthermore, upon careful consideration, we excluded several sources from our final analysis, including: data from MONICA (as the samples were not representative at the national level), WHS from developing countries (as the prevalence of overweight and obesity was implausible and very different from other available data sources), surveys that sampled only select urban or select rural populations. Webtable 8 provides a list of surveys reviewed and excluded in the current study.

For 448 of the sources, we extracted the prevalence of overweight and obesity from reports. We only included sources that used the same definitions of overweight and obesity as in our study. We excluded reports that present prevalence data based on alternative cutoffs. For child data, previous studies comparing national childhood obesity cutoffs have found substantial cross-country variation.<sup>16</sup> Therefore, we excluded studies which utilized national standards for defining child obesity such as UK90 which are not comparable with the IOTF standard.<sup>17</sup> We also excluded adult data that used local standards for adult overweight and obesity; for instance, report data from the Taiwan BRFSS utilized  $\text{BMI} \geq 24$  as the cutoff for overweight and  $\text{BMI} \geq 27$  for obese.<sup>18</sup> Overweight and obesity defined using alternative measurements such as waist circumference, hip-waist ratio were also excluded in the current study due to the lack of data for reliable cross-walking.

**Webtable 1** Number of data points included in the study by GBD regions and decades

| Region               | 1980s | 1990s | 2000s | 2010s | Total |
|----------------------|-------|-------|-------|-------|-------|
| Andean Latin America | 2     | 36    | 69    | 31    | 138   |

| Region                       | 1980s        | 1990s        | 2000s         | 2010s        | Total         |
|------------------------------|--------------|--------------|---------------|--------------|---------------|
| Australasia                  | 57           | 80           | 217           | 81           | 435           |
| Caribbean                    | 13           | 49           | 153           | 28           | 243           |
| Central Asia                 | 0            | 36           | 146           | 18           | 200           |
| Central Europe               | 12           | 168          | 909           | 210          | 1,299         |
| Central Latin America        | 14           | 51           | 450           | 66           | 581           |
| Central Sub-Saharan Africa   | 0            | 9            | 53            | 22           | 84            |
| East Asia                    | 48           | 178          | 363           | 80           | 669           |
| Eastern Europe               | 0            | 371          | 597           | 121          | 1,089         |
| Eastern Sub-Saharan Africa   | 26           | 122          | 279           | 101          | 528           |
| High-income Asia Pacific     | 390          | 424          | 600           | 126          | 1,540         |
| High-income North America    | 497          | 665          | 1,005         | 274          | 2,441         |
| North Africa and Middle East | 27           | 144          | 628           | 177          | 976           |
| Oceania                      | 2            | 10           | 98            | 16           | 126           |
| South Asia                   | 1            | 47           | 203           | 68           | 319           |
| Southeast Asia               | 11           | 79           | 446           | 83           | 619           |
| Southern Latin America       | 0            | 0            | 98            | 28           | 126           |
| Southern Sub-Saharan Africa  | 2            | 95           | 168           | 104          | 369           |
| Tropical Latin America       | 2            | 95           | 123           | 39           | 259           |
| Western Europe               | 540          | 1,109        | 3,975         | 945          | 6,569         |
| Western Sub-Saharan Africa   | 112          | 153          | 290           | 79           | 634           |
| <b>Total</b>                 | <b>1,756</b> | <b>3,921</b> | <b>10,870</b> | <b>2,697</b> | <b>19,244</b> |

## Section 2. Literature Review

In addition to survey and report data, existing literature on obesity and overweight were identified through a Medline search. In particular, we searched for articles published between 1 January 1980 and 31 December 2013. The specific PubMed search term is: "Overweight"[Mesh] OR "Obesity"[Mesh]). We limited the search to population-based studies on human subjects using the following terms: "humans"[Mesh] AND ("Data Collection"[Mesh] OR "Health Services Research"[Mesh] OR "Population Surveillance"[Mesh] OR "Vital statistics"[Mesh] OR "Population"[Mesh] OR "Epidemiology"[Mesh] OR "survey\*"[TiAb]) NOT Comment[ptyp] NOT Case Reports[ptyp] NOT "hospital"[TiAb]. A total of 7620 articles were identified through the process, of which 543 were selected for this study. The exclusion criteria for the articles are as followed:

- A. Non-random sampling: studies were excluded if the sample was not selected randomly from the population.
- B. Subpopulations: studies with samples from a particular population group, such as aboriginal groups, immigrant groups, specific employment status, economic status, pregnant women, patient groups.
- C. Alternative cutoffs or measurements: studies that reported prevalence of overweight and obesity based on cutoffs other than BMI $\geq$ 25 or BMI $\geq$ 30 for adult, and studies which reported using criteria other than COLE/IOTF for children were excluded. In addition, prevalence estimates based on alternative measurements such as hydrodensitometry, MRI, CT, skin-fold thickness, and waist-circumference were excluded.
- D. Below the age of 2 years: studies that reported on children under the age of 2 were excluded.
- E. Inadequate sampling details: studies that did not provide adequate details of the sampling method or the sample composition were excluded.
- F. Small sample sizes: studies with a sample size of less than 100 were excluded.

### Section 3. Definition of Childhood Overweight and Obesity

To date, there is still not a unified global standard for classifying childhood overweight and obesity.<sup>19</sup> In this study, we utilized the International Obesity Task Force (IOTF) BMI-for-age standard for defining overweight and obesity under the age of 18.<sup>20-22</sup> The IOTF standard was derived using nationally representative data from children between age 2 and age 18 from six locations including UK, USA, The Netherlands, Brazil, Singapore and Hong Kong. Using LMS method, BMI centiles were constructed. Cutoff points were defined for each age (by months) such that they aligned with the adult definition at the age of 18.

An alternative criterion for defining childhood and adolescent overweight and obesity internationally is the WHO standard. Specifically, for children under the age of 5 years the 2006 WHO Child Growth Standards provides z-scores for BMI by sex and age group.<sup>23</sup> Overweight is defined as 2 standard deviations (SD) above the median BMI, whereas obesity is defined as 3SD above the median.<sup>24</sup> For children and adolescents aged 5-19 years, cutoffs were provided in the WHO growth reference for school-aged children and adolescents.<sup>25</sup> Overweight is defined as 1SD above the median and obesity is defined as 2SD above the median. While the WHO Child Growth Standards was derived from both longitudinal and cross-sectional data from children in 6 sites including Brazil, Ghana, India, Norway, Oman and USA, the WHO growth reference for school-aged children was based on data from US surveys.

Due to differences in sample and growth curve fitting strategies, IOTF and the WHO cutoffs vary. Several studies have discussed and compared the two standards.<sup>26</sup> The resulting prevalence estimates of overweight and obesity differed significantly depending on which criteria was chosen.<sup>27</sup> For example, it has been shown using data from the Czech Republic National Survey on children and adolescents 2001 that the prevalence of obesity among boys of age 5 is 3.1% using IOTF standard vs. 1.5% using WHO.<sup>28</sup>

One of the issues which limited the use of WHO standard in this study is the switch of cutoff at the age of 5. It has been acknowledged in the literature that such discontinuity in cutoff yields an artificial shift in prevalence estimates.<sup>20</sup> Given the current analysis involves the estimation of prevalence of overweight and obesity for children spanning age 2 to 18, such discontinuity in cutoff could be problematic. Moreover, IOTF/COLE cutoff is used in considerably more published studies (over 60% of the identified literature utilized IOTF/COLE standard). To maximize the number of data sources, the IOTF standard was adopted.

## Section 4. Bias Adjustment

### A. Calculation of bias adjustment factors

Out of 19,242 data points used in this study, just under 50% were self-report data and the rest were measured. It has long been documented that self-report data are subject to bias.<sup>19,29-31</sup> For instance, women tend to under-report weight while men tend to over-report height.<sup>32</sup> Moreover, self-report bias varies across age.<sup>33</sup> To address this issue, we implemented a bias correction for self-reported data. Specifically, we compared self-report data with measured data which were also available from the same year, country, sex and age. For countries Sub-Saharan Africa, there is a lack of self-report and measured data which match exactly by year, sex and age. Given that changes in prevalence of overweight and obesity have been reported to be relatively moderate in the region,<sup>19,34</sup> to maximize the use of available information, we compared data which fell within  $\pm 3$  years window. Webtable 2 shows the total number of country data points used in the adjustment analysis. For prevalence of overweight, the following mixed effects model was used:

$$\text{logit}(P_M) = \beta_0 + \beta_1 \text{logit}(P_{SR}) + \beta_2 S_{age1} + \beta_3 S_{age2} + \beta_4 S_{age3} + \alpha_r + \epsilon$$

where  $P_M$  is the prevalence of overweight based on measured data and  $P_{SR}$  is the prevalence of overweight based on self-report data. A cubic spline was used to account for age patterns in the data. The spline bases are represented as  $S_{age1}$ ,  $S_{age2}$ ,  $S_{age3}$  in the equation above. Finally, to capture regional differences, a random intercept on GBD super regions,  $\alpha_r$ , was included in the model. As for prevalence of obesity due to the lack of significant age variation, a simplified model was used:

$$\text{logit}(P_M) = \beta_0 + \beta_1 \text{logit}(P_{SR}) + \alpha_r + \epsilon$$

These models were run separately for males and females. Using the estimated coefficients,  $\hat{\beta}_0 \dots \hat{\beta}_4$  and  $\hat{\alpha}_r$ , we then predicted prevalence of overweight and obesity for surveys and reports that only provided data based on self-report. The coefficients from the adjustment models are presented in Webtable 3 and the variation in the regional random intercept is presented in Webfigure 1.

**Webtable 2.** Countries and number of data points used for bias adjustment analysis

|                  | Female    | Male           |
|------------------|-----------|----------------|
| <b>Countries</b> | Benin     | China          |
|                  | China     | Finland        |
|                  | Columbia  | Germany        |
|                  | Egypt     | Guyana         |
|                  | Finland   | Japan          |
|                  | Germany   | India          |
|                  | Ghana     | Indonesia      |
|                  | Guyana    | Poland         |
|                  | Japan     | Russia         |
|                  | India     | Sweden         |
|                  | Indonesia | Turkey         |
|                  | Peru      | Uganda         |
|                  | Poland    | United Kingdom |
|                  | Russia    | United States  |
|                  | Slovenia  |                |

|                              | Female         | Male |
|------------------------------|----------------|------|
|                              | Sweden         |      |
|                              | Turkey         |      |
|                              | Uganda         |      |
|                              | United Kingdom |      |
|                              | United States  |      |
| <b>Number of data points</b> | 538            | 515  |

**Webtable 3.** Estimated fixed effect coefficients ( $\beta_0$  and  $\beta_1$ ) and 95% uncertainty intervals.

| Overweight    |                            |                         |
|---------------|----------------------------|-------------------------|
|               | $\beta_0$                  | $\beta_1$               |
| <b>Female</b> | 0.310<br>(-0.245, 0.864)   | 0.841<br>(0.776, 0.906) |
| <b>Male</b>   | -0.792<br>(-1.562, -0.022) | 0.770<br>(0.711, 0.829) |
| Obesity       |                            |                         |
| <b>Female</b> | -0.396<br>(-0.900, 0.107)  | 0.672<br>(0.615, 0.728) |
| <b>Male</b>   | -0.894<br>(-1.592, -0.311) | 0.569<br>(0.506, 0.632) |

**Webfigure 1.** Estimated random effect ( $\alpha_r$ ) for GBD super regions with 95% uncertainty intervals.

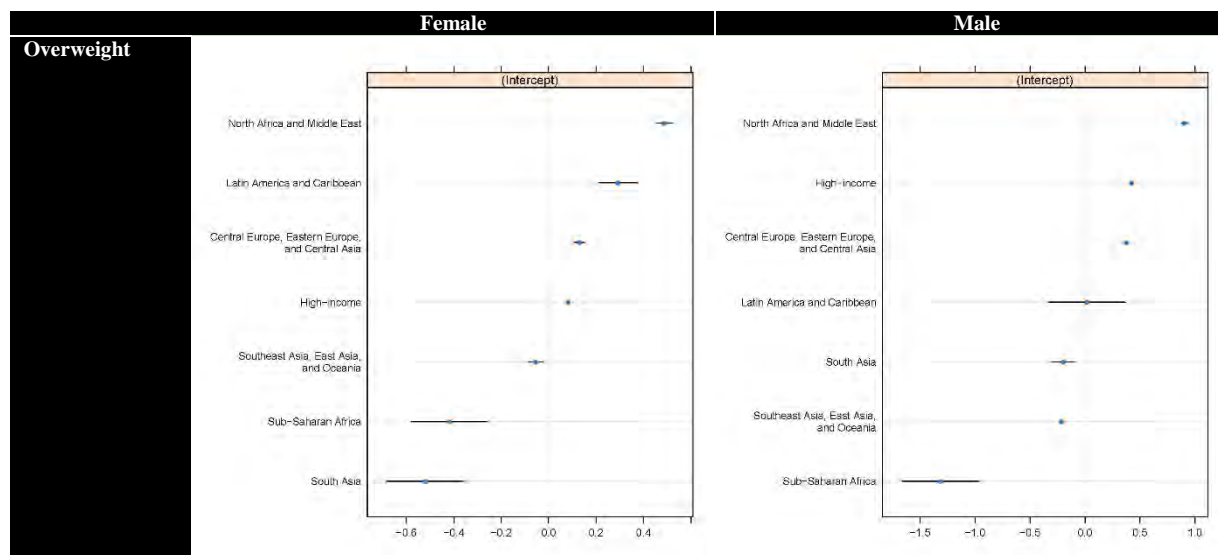

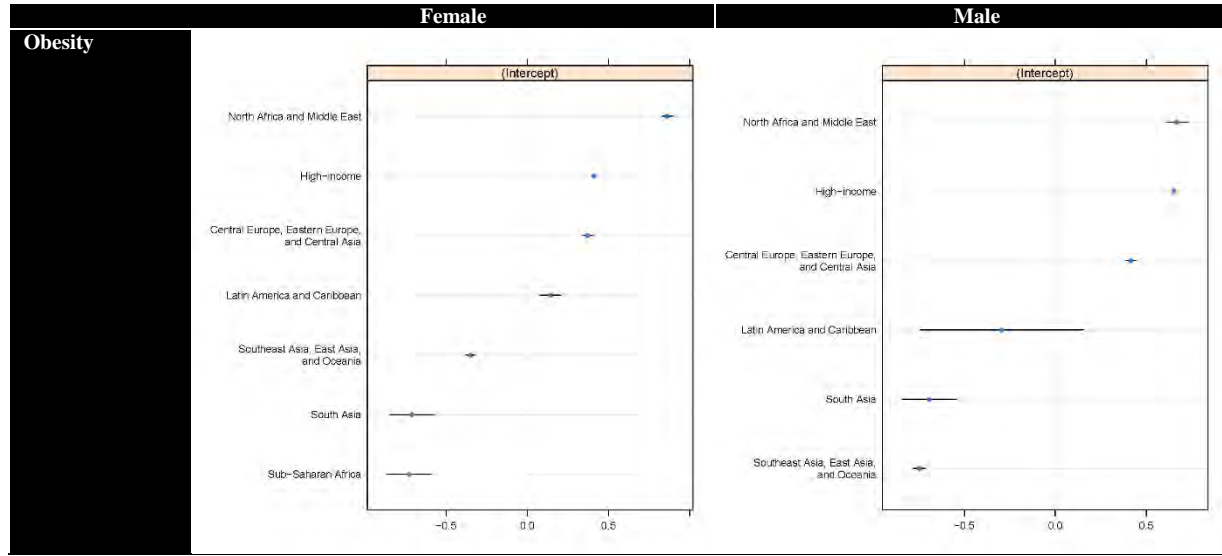

## B. Propagation of uncertainty in adjusted values

To quantify the uncertainty in the adjusted estimates from the mixed effects models described above, we calculated the prediction errors. Specifically, the prediction error,  $\widehat{PE}$ , is estimated as follows:

$$\widehat{PE} = X^2 var(\hat{\beta}) + var(\hat{\alpha}_r) + \sigma_\epsilon^2,$$

where  $var(\hat{\beta})$  is the variance in estimated fixed effects coefficients and  $X$  is the independent variable (i.e. self-report data in this case),  $var(\hat{\alpha}_r)$  is the uncertainty in the random effect estimates and  $\sigma_\epsilon^2$  is the residual variance. Proper estimation of prediction errors is crucial as the data synthesis procedure, Gaussian process regression (described in the subsequent section), takes into account data uncertainty when generating fitted values. More weights are given to data with less uncertainty. The prediction errors yielded from the bias adjustment were therefore incorporated as data variance propagated through the Gaussian process regression step to obtain the final prevalence and uncertainty intervals estimates.

## Section 5. Estimating Prevalence of Obesity and Overweight for Different Age Groups

In this study, we are interested in estimating prevalence of overweight and obesity separately for males and females in every country for age 2 to 4 years, each five-year age group from age 10 to 80 years, and for all ages above 80 combined. While such information was easily extracted from surveys in which the microdata were available, many published reports presented data in broader age groups and occasionally for both sexes combined. To reduce data inconsistencies that arose from different age and sex groupings, we disaggregated these data into the age and sex grouping of interest in this study by applying an age-sex splitting model previously used in the Global Burden of Diseases, Injuries, and Risk Factors Study (GBD)<sup>35</sup> and more recently in a study estimating global smoking prevalence.<sup>36</sup>

The age-sex splitting model capitalized on all surveys that provided information on several different age-sex groupings. Using these surveys as references, the following model was applied. Specifically, let  $\tilde{p}_{a,c,s}$  be the final estimate of overweight/obesity prevalence for the target age group  $a$  and sex  $s$  in country  $c$ . To disaggregate data that were reported in a broad age group but separately for sex, the following formula was used:

$$\tilde{p}_{a,c,s} = \frac{N_{a,c,s,k}^{a+x}}{Pop_{a,c,s}} \left( \frac{R_{a,s}}{R_{a,s}^{a+x}} \right)$$

where  $N_{a,s,c}^{a+x}$  is the number of overweight/obese individuals reported from survey  $k$ , for country  $c$ , sex  $s$ , and an age group spanning age  $a$  to  $(a + x)$ ;  $R_{a,s}$  is the total number of overweight/obese individuals reported in the reference surveys for the target five-year age group  $a$ ;  $R_{a,s}^{a+x}$  is the total number of overweight/obese individuals also reported in the reference surveys but spanning the age group  $a$  to  $a + x$ ;  $Pop_{a,c,s}$  is the population of the target five-year age group  $a$ , for country  $c$ , and sex  $s$ .

To disaggregate data that were reported with both sexes combined and in a broad age group, the following formula was applied:

$$\tilde{p}_{a,s,c} = \frac{N_{a,c,k}^{a+x}}{Pop_{a,c,s}} \left( \frac{R_{a,s}}{R_a^{a+x}} \right)$$

where  $N_{a,c,k}^{a+x}$  is the number of overweight/obese individuals reported from survey  $k$  for country  $c$ , both sexes combined and an age group spanning age  $a$  to  $a + x$ ;  $R_{a,s}$  is the total number of overweight/obese individuals reported in the reference surveys for the target sex group  $s$  and target five-year age group  $a$ ;  $R_a^{a+x}$  is the total number of overweight/obese individuals also reported in the reference surveys with both sexes combined spanning the age group  $a$  to  $a + x$ ;  $Pop_{a,c,s}$  is the population of the target five-year age group  $a$ , for country  $c$ , and the target sex group  $s$ .

## Section 6. Prevalence Estimation using Gaussian Process Regression

Gaussian Process Regression (GPR) was applied to data for each country-age-sex group to derive a complete time series of overweight/obesity prevalence. GPR is a stochastic modeling technique that is designed to detect signals amidst noisy data. It also serves as a powerful tool for interpolating non-linear trends.<sup>37,38</sup> Unlike classical linear models that assume that the trend underlying data follows a definitive functional form, GPR assumes that the specific trend of interest



follows a Gaussian Process, which is defined by a mean function  $m(\cdot)$  and a covariance function  $Cov(\cdot)$ . Specifically, let  $p_{c,a,s,t}$  be the prevalence of overweight/obesity observed in country  $c$ , for age group  $a$ , and sex  $s$  at time  $t$ :

$$\text{logit}(p_{c,a,s,t}) = g_{c,a,s}(t) + \epsilon_{c,a,s,t}$$

where

$$\epsilon_{c,a,s,t} \sim \text{Normal}(0, \sigma_p^2),$$

$$g_{c,a,s}(t) \sim \text{GP}\left(m_{c,a,s}(t), \text{Cov}\left(g_{c,a,s}(t)\right)\right).$$

$\sigma_p^2$  represents the error variance, which is composed of the squared standard error of the observed data point as well as the prediction errors from the cross-walk models, if applicable. The derivation of the mean and covariance functions,  $m_{c,a,s}(t)$  and  $\text{Cov}\left(g_{c,a,s}(t)\right)$ , is described below.

#### *Estimation of mean function*

We estimated the mean function using a two-step approach. To be more specific,  $m_{c,a,s}(t)$  can be expressed as:

$$m_{c,a,s}(t) = X\beta + h(r_{c,a,s,t})$$

where  $X\beta$  is a linear model and  $h(r_{c,a,s,t})$  is a smoothing function for the residuals,  $r_{c,a,s,t}$ , derived from the linear model. Two linear models were used to derive the mean function for prevalence of overweight and obesity combined (i.e. BMI  $\geq 25$ ) and the prevalence of obesity alone (i.e. BMI  $\geq 30$ ). For prevalence of overweight and obese combined, the following linear model was used:

$$\text{logit}(p_{c,a,t}^{ow}) = \beta_0 + \beta_1 \log(Kcal_{pc,t}) + \beta_2 Lat_c + \beta_3 Urban_{c,t} + \sum_{k=4}^{k+16} \beta_k I_{age} + \sum_{k=21}^{k+21} \beta_k I_{region},$$

where  $p_{c,a,t}^{ow}$  is the prevalence of overweight and obese combined, the covariates are total kilocalories consumed per year per capita ( $Kcal_{pc,t}$ ), obtained from the Food and Agriculture Organization food balance sheet.<sup>39</sup> Total kilocalories consumed per year per capita is used as a covariate as previous studies have noted a strong connection between food consumption and overweight and obesity<sup>40</sup> In addition, latitude ( $Lat_c$ ) and urbanicity ( $Urban_{c,t}$ ) as captured by the proportion of country area with population density of 1000 people/km<sup>2</sup> were also included to capture the inter- and intra-country variation in overweight and obesity. Finally, a set of dummy indicators  $I_{age}$  and  $I_{region}$  were included to capture the age pattern and regional variation respectively.

For prevalence of obesity,  $p_{c,a,t}^{ob}$ , the following linear model was applied:

$$\text{logit}\left(\frac{p_{c,a,t}^{ob}}{p_{c,a,t}^{ow}}\right) = \beta_0 + \beta_1 \log(Kcal_{c,t}) + \beta_2 Lat_c + \beta_3 Urban_{c,t} + \sum_{k=4}^{k+16} \beta_k I_{age} + \sum_{k=21}^{k+21} \beta_k I_{region}$$

Note that the prevalence of obesity was modeled as a fraction of the combined category of overweight and obesity. The rationale for using this strategy was to ensure that the prevalence of obesity does not exceed the combined category of overweight and obesity, which was bound between 0 and 1.

In addition to the model described above we explored models with alternative covariates which capture food consumption, specifically, composite scores ( $Food1_{c,t}, Food2_{c,t}, Food3_{c,t}, Food4_{c,t}$ ) derived using principal component analysis from the diet components estimates in the Food and Agriculture Organization food balance sheet. We also explored models with different combination of covariates. Time was not considered as a covariate in any of the models for several reasons. First, the covariates considered in the models such as  $Kcal_{c,t}, Food1_{c,t}, Food2_{c,t}, Food3_{c,t}, Food4_{c,t}$  and  $Urban_{c,t}$  are functions of time. Inclusion of time as a variable in the models can induce collinearity. Second, the time variable can inappropriately impose a similar time trend on all countries. This is particularly problematic in situations where data are sparse. Third, temporal association among data was captured in the spatio-temporal smoothing step (described in subsequent paragraphs), which allowed nonlinear time trends and variations across countries. The best model was selected based on the in-sample and out-of-sample root mean square error. Webtable 4 summarizes all the models used and fit statistics.

**Webtable 4** Comparisons of linear models

| Model Specification                                                                                                                                                                                                                        | In-sample RMSE | Out-of-sample RMSE |
|--------------------------------------------------------------------------------------------------------------------------------------------------------------------------------------------------------------------------------------------|----------------|--------------------|
| <b>Overweight</b>                                                                                                                                                                                                                          |                |                    |
| $\text{logit}(p_{c,a,t}^{ow}) = \beta_0 + \beta_1 \log(Kcal_{pc,t}) + \sum_{k=2}^{k+16} \beta_k I_{age} + \sum_{k=19}^{k+21} \beta_k I_{region}$                                                                                           | 0.102          | 0.101              |
| $\text{logit}(p_{c,a,t}^{ow}) = \beta_0 + \beta_1 Food1_{c,t} + \beta_2 Food2_{c,t} + \beta_3 Food3_{c,t} + \beta_4 Food4_{c,t} + \sum_{k=5}^{k+16} \beta_k I_{age} + \sum_{k=22}^{k+21} \beta_k I_{region}$                               | 0.104          | 0.103              |
| $\text{logit}(p_{c,a,t}^{ow}) = \beta_0 + \beta_1 Food1_{c,t} + \beta_2 Food2_{c,t} + \beta_3 Food3_{c,t} + \beta_4 Food4_{c,t} + \beta_5 Lat + \sum_{k=6}^{k+16} \beta_k I_{age} + \sum_{k=23}^{k+21} \beta_k I_{region}$                 | 0.104          | 0.103              |
| $\text{logit}(p_{c,a,t}^{ow}) = \beta_0 + \beta_1 Food1_{c,t} + \beta_2 Food2_{c,t} + \beta_3 Food3_{c,t} + \beta_4 Food4_{c,t} + \beta_5 Lat + \beta_6 Urban + \sum_{k=7}^{k+16} \beta_k I_{age} + \sum_{k=24}^{k+21} \beta_k I_{region}$ | 0.103          | 0.101              |
| $\text{logit}(p_{c,a,t}^{ow}) = \beta_0 + \beta_1 \log(Kcal_{pc,t}) + \beta_2 Lat_c + \sum_{k=3}^{k+16} \beta_k I_{age} + \sum_{k=20}^{k+21} \beta_k I_{region}$                                                                           | 0.102          | 0.101              |
| $\text{logit}(p_{c,a,t}^{ow}) = \beta_0 + \beta_1 \log(Kcal_{pc,t}) + \beta_2 Lat_c + \beta_3 Urban_{c,t} + \sum_{k=4}^{k+16} \beta_k I_{age} + \sum_{k=21}^{k+21} \beta_k I_{region}$                                                     | 0.101          | 0.100              |

| Model Specification                                                                                                                                                                                                                                                          | In-sample RMSE | Out-of-sample RMSE |
|------------------------------------------------------------------------------------------------------------------------------------------------------------------------------------------------------------------------------------------------------------------------------|----------------|--------------------|
| Obesity                                                                                                                                                                                                                                                                      |                |                    |
| $\text{logit}\left(\frac{p_{c,a,t}^{ob}}{p_{c,a,t}^{ow}}\right) = \beta_0 + \beta_1 \log(Kcal_{pc,t}) + \sum_{k=2}^{k+16} \beta_k I_{age} + \sum_{k=19}^{k+21} \beta_k I_{region}$                                                                                           | 0.070          | 0.071              |
| $\text{logit}\left(\frac{p_{c,a,t}^{ob}}{p_{c,a,t}^{ow}}\right) = \beta_0 + \beta_1 Food1_{c,t} + \beta_2 Food2_{c,t} + \beta_3 Food3_{c,t} + \beta_4 Food4_{c,t} + \sum_{k=5}^{k+16} \beta_k I_{age} + \sum_{k=22}^{k+21} \beta_k I_{region}$                               | 0.071          | 0.072              |
| $\text{logit}\left(\frac{p_{c,a,t}^{ob}}{p_{c,a,t}^{ow}}\right) = \beta_0 + \beta_1 Food1_{c,t} + \beta_2 Food2_{c,t} + \beta_3 Food3_{c,t} + \beta_4 Food4_{c,t} + \beta_5 Lat + \sum_{k=6}^{k+16} \beta_k I_{age} + \sum_{k=23}^{k+21} \beta_k I_{region}$                 | 0.071          | 0.072              |
| $\text{logit}\left(\frac{p_{c,a,t}^{ob}}{p_{c,a,t}^{ow}}\right) = \beta_0 + \beta_1 Food1_{c,t} + \beta_2 Food2_{c,t} + \beta_3 Food3_{c,t} + \beta_4 Food4_{c,t} + \beta_5 Lat + \beta_6 Urban + \sum_{k=7}^{k+16} \beta_k I_{age} + \sum_{k=24}^{k+21} \beta_k I_{region}$ | 0.069          | 0.071              |
| $\text{logit}\left(\frac{p_{c,a,t}^{ob}}{p_{c,a,t}^{ow}}\right) = \beta_0 + \beta_1 \log(Kcal_{pc,t}) + \beta_2 Lat_c + \sum_{k=3}^{k+16} \beta_k I_{age} + \sum_{k=20}^{k+21} \beta_k I_{region}$                                                                           | 0.070          | 0.071              |
| $\text{logit}\left(\frac{p_{c,a,t}^{ob}}{p_{c,a,t}^{ow}}\right) = \beta_0 + \beta_1 \log(Kcal_{pc,t}) + \beta_2 Lat_c + \beta_3 Urban_{c,t} + \sum_{k=4}^{k+16} \beta_k I_{age} + \sum_{k=21}^{k+21} \beta_k I_{region}$                                                     | 0.069          | 0.069              |

While the linear component captures the general trend in overweight/obesity prevalence, some of the data variability is still not adequately accounted for. The smoothing function  $h(r_{c,a,s,t})$  aims to systematically estimate this residual variability by borrowing strength across time, age and space patterns. To be more specific, a locally weighted polynomial regression (LOESS) was applied to the residuals ( $r_{c,a,s,t}$ ) from the linear model. The weights for LOESS were calculated according to three dimensions: time, age and space. The time adjustment parameter, defined by  $\lambda$ , aims to allow borrowing strength from neighboring time points. The age adjustment parameter, defined by  $\omega$ , aims to allow borrowing strength from data in neighboring age groups. Finally, the space adjustment parameter, defined by  $\zeta$ , aims to allow borrowing strength across countries within the same region. For the situation at hand, these parameters are set at 0.9, 1.5, and 2, respectively. To elaborate, let  $w_{c,a,s,t}$  be the final weight assigned to observation ( $r_{c,a,s,t}$ ) with reference to the focal observation ( $r_{c_0,a_0,s_0,t_0}$ ).<sup>41,42</sup> First, we generated a preliminary weight ( $w'_{c,a,s,t}$ ) for smoothing over time. The weight is based on a scaled distance along the time dimension of the two observations, in particular the distance between time  $t$  of the observation  $r_{c,a,s,t}$  and time  $t_0$  of the focal observation  $r_{c_0,a_0,s_0,t_0}$ .

$$w'_{c,a,s,t} = \left(1 - \left(\frac{|t - t_0|}{1 + \max|t - t_0|}\right)^\lambda\right)^3$$

Second, we generated an additional preliminary weight ( $w''_{c,a,s,t}$ ) for smoothing over age, which is based on a scaled distance along the age dimension of two observations, in particular the distance between the age  $a$  of the observation  $r_{c,a,s,t}$  and age  $a_0$  of the focal observation  $r_{c_0,a_0,s_0,t_0}$ . The weight is defined as follows:

$$w''_{c,a,s,t} = \frac{1}{e^{\omega \cdot |a-a_0|}}$$

Finally, the time and age weights derived above are multiplied and further adjusted to account for the spatial pattern. Specifically, we defined spatial relationship by categorizing data into three groups: 1) observations from the same country, 2) observations from different countries but the same GBD region, 3) observations from different regions. We put the most weight on observations coming from the same country. Specifically, weights for each category are derived as follows:

- 1) If the country,  $c$ , of the observation  $r_{c,a,s,t}$  is identical to the country,  $c_0$ , of the focal observation  $r_{c_0,a_0,s_0,t_0}$ :

$$w_{c,a,s,t} = \frac{\zeta(w'_{c,a,s,t} \cdot w''_{c,a,s,t})}{\sum_{c=c_0} w'_{c,a,s,t} \cdot w''_{c,a,s,t}} \quad \forall c = c_0$$

- 2) If the country,  $c$ , of the observation  $r_{c,a,s,t}$  is different from the country,  $c_0$ , of the focal observation  $r_{c_0,a_0,s_0,t_0}$ , but both countries belong to the same region  $R$ :

$$w_{c,a,s,t} = \frac{(1 - \zeta)(w'_{c,a,s,t} \cdot w''_{c,a,s,t})}{\sum_{c \neq c_0} w'_{c,a,s,t} \cdot w''_{c,a,s,t}} \quad \forall c \neq c_0 \cap R[c] = R[c_0]$$

- 3) If the country,  $c$ , of the observation  $r_{c,a,s,t}$  is different from the country,  $c_0$ , of the focal observation  $r_{c_0,a_0,s_0,t_0}$ , and they do not belong to the same region  $R$ :

$$w_{c,a,s,t} = 0 \quad \forall R[c] \neq R[c_0]$$

This weighting strategy has been applied previous in various studies, where more details can be found.<sup>43</sup>

#### *Defining the covariance for the Gaussian Process Regression*

Another key component in GPR is the covariance function, which defines the shape and distribution of trends. In this study, we applied the Matern covariance function, which offers flexibility to model a wide spectrum of trends with varying degrees of smoothness. The function is defined as:

$$M(t, t') = \sigma^2 \frac{2^{1-\nu}}{\Gamma(\nu)} \left( \frac{d(t, t')\sqrt{2\nu}}{l} \right)^\nu K_\nu \left( \frac{d(t, t')\sqrt{2\nu}}{l} \right)$$

where  $d(\cdot)$  is a distance function;  $\sigma^2$ ,  $\nu$ ,  $l$ , and  $K_\nu$  are the hyperparameters of the covariance function;  $\sigma^2$  is the marginal variance;  $\nu$  is the smoothness parameter that defines the differentiability of the function;  $l$  is the length scale, which roughly defines the distance between which two points become uncorrelated; and  $K_\nu$  is the Bessel function. Based on previous applications of GPR,<sup>43</sup> we approximated  $\sigma^2$  by  $MADN(r'_{c,a,s,t})$ , which is the normalized median absolute deviation of the residuals from the smoothing step for each country. For this application,  $\nu$  is set to 2 and  $l$  is set to 10.

#### *Prediction using Gaussian Process Regression*

Based on the specification above, to predict the time series of prevalence of overweight/obesity for country  $c$ , age  $a$ , and sex  $s$  for time  $t_*$ , we integrated over  $g_{c,a,s}(t_*)$  to obtain the following:

$$\text{logit}(p_{c,a,s,t_*}) \sim N\left(m_{c,a,s}(t_*), \sigma_p^2 I + \text{Cov}\left(g_{c,a,s}(t_*)\right)\right)$$

Random draws of 1,000 samples were obtained from the distributions above for every country, age, and sex group. The final estimated prevalence for each country, age, and sex group was the mean of the draws. In addition, uncertainty intervals were obtained by taking the 2.5 and 97.5 percentiles of the samples. Note that the entire process was conducted in logit scale, all values were back-transformed to the original scale. The analysis was implemented though PyMC package in Python.

## Section 7. Cross-Validation

To assess the accuracy of our estimates, we carried out cross-validation by randomly holding out 20% of the sample from the measured data, 10 separate times. We specifically held out measured data as they were considered as the “gold-standard.” We computed the average root mean squared errors (RMSE) and the coverage of the 95% prediction intervals. The results are shown in Webtable 5. The RMSE for the training set (which contained both measured and self-report data) and test set (which contained only measured data) for the estimation of overweight prevalence were 0.048 and 0.063 respectively. Compared with the RMSE from the original fit with the full dataset, which was 0.059, these results indicated that our models have reasonable out-of-sample prediction accuracy. Similarly for the estimation of obesity prevalence, the RMSE for the training set was 0.036 and for test set was 0.047 compared with that of the full dataset which was 0.043. The RMSE from the test set was not markedly different from that of the full dataset.

Furthermore, we evaluated the validity of our uncertainty estimate by examining the coverage of the 95% prediction intervals. The coverage of prediction intervals for the test set was calculated by the proportion of hold-out sample (i.e. the test set) that was included within the intervals. The coverage of the prediction intervals for the training and full datasets were calculated by the proportion of the in-sample data that was included in the intervals. As shown in Webtable 5, for prevalence of overweight the coverage of prediction intervals for the training and full data was 97.1% and 95.9%, respectively. The coverage of the prediction intervals for the test set was 93.8, which was less than the in-sample coverage, but still close to the nominal level. Similarly for prevalence of obesity, the coverage of prediction intervals for the training and full data was 95.6% and 94.5%, respectively. The coverage of the prediction intervals for the test set was 92.3%, which was reasonably close to the desired coverage level.

**Webtable 5:** Root mean squared error and the coverage of 95% prediction intervals for training set, test set and all data. Cross-validation was carried out 10 times.

a. Prevalence of overweight

|                                  | RMSE  | 95% Prediction intervals coverage |
|----------------------------------|-------|-----------------------------------|
| Training set                     | 0.048 | 97.1%                             |
| Test set<br>(measured data only) | 0.063 | 93.8%                             |

|              | RMSE  | 95% Prediction intervals coverage |
|--------------|-------|-----------------------------------|
| Full dataset | 0.059 | 95.9%                             |

b. Prevalence of obesity

|                                  | RMSE  | 95% Prediction intervals coverage |
|----------------------------------|-------|-----------------------------------|
| Training set                     | 0.036 | 95.6%                             |
| Test set<br>(measured data only) | 0.047 | 92.3%                             |
| Full dataset                     | 0.043 | 94.5%                             |

## Section 8. Sensitivity Analysis

Adjusted self-report data were included in our analysis. To assess the adequacy of our correction and the potential bias induced by inclusions of self-report data, a sensitivity analysis was carried out in which all self-report data were excluded. Webtable 6 compares the root mean squared error (RMSE) for predicting *measured* prevalence of overweight and obesity using models based on full dataset (with both self-report and measured data) and model based on measured data only. The RMSE based on model using only measured dataset was 0.0477 for overweight and 0.0361 for obesity, compared to the RMSE based on our current model using both self-report and measured data which were 0.0481 for overweight and 0.0364 for obesity. The differences were negligible. Furthermore, correlation analysis suggested high association between the estimated prevalence based on the full dataset and that based on the measured dataset. Pearson's correlation coefficients were 0.96 for both overweight and obesity.

**Webtable 6:** Root mean squared error in prediction of measured prevalence using the current model (based on both self-report and measured data) and alternative model (based solely on measured data).

| Model                                           | RMSE       |         |
|-------------------------------------------------|------------|---------|
|                                                 | Overweight | Obesity |
| Full dataset<br>(both self-report and measured) | 0.0481     | 0.0364  |
| Measured data only                              | 0.0477     | 0.0361  |

## References

- 1 Measure DHS: Demographic and Health Surveys. <http://www.measuredhs.com/> (accessed 15 Oct2013).
- 2 STEPwise approach to surveillance (STEPS). WHO. <http://www.who.int/chp/steps/en/> (accessed 15 Oct2013).
- 3 Eurobarometer Surveys. Eur. Comm. [http://ec.europa.eu/public\\_opinion/index\\_en.htm](http://ec.europa.eu/public_opinion/index_en.htm) (accessed 16 Oct2013).
- 4 Multiple Indicator Cluster Survey (MICS). UNICEF Stat. Monit. [http://www.unicef.org/statistics/index\\_24302.html](http://www.unicef.org/statistics/index_24302.html) (accessed 16 Oct2013).
- 5 World Health Survey (WHS). WHO Multi-Ctry. Stud. Data Arch. <http://apps.who.int/healthinfo/systems/surveydata/index.php/catalog/whs/about> (accessed 16 Oct2013).
- 6 Reproductive Health Surveys. Cent. Dis. Control Prev. <http://www.cdc.gov/reproductivehealth/Global/surveys.htm> (accessed 16 Oct2013).
- 7 The Survey of Health, Ageing and Retirement in Europe (SHARE). SHARE. <http://www.share-project.org/> (accessed 27 Jan2014).
- 8 International Social Survey Programme. ISSP. <http://www.issp.org/> (accessed 27 Jan2014).
- 9 WHO Global InfoBase. <https://apps.who.int/infobase/> (accessed 15 Oct2013).
- 10 Obesity data portal. Int. Assoc. Study Obes. <http://www.iaso.org/resources/obesity-data-portal/> (accessed 28 Dec2013).
- 11 Global Health Data Exchange. IHME GHDx. <http://ghdx.healthmetricsandevaluation.org/> (accessed 15 Oct2013).
- 12 Wang Y, Monteiro C, Popkin BM. Trends of obesity and underweight in older children and adolescents in the United States, Brazil, China, and Russia. *Am J Clin Nutr* 2002; **75**: 971–7.
- 13 Sichieri R, Coitinho DC, Leão MM, Recine E, Everhart JE. High temporal, geographic, and income variation in body mass index among adults in Brazil. *Am J Public Health* 1994; **84**: 793–8.
- 14 Jackson JE, Doescher MP, Jerant AF, Hart LG. A National Study of Obesity Prevalence and Trends by Type of Rural County. *J Rural Health* 2005; **21**: 140–8.
- 15 World Urbanization Prospects, the 2011 Revision. New York, United States, United Nations, Department of Economic and Social Affairs, Population Division <http://esa.un.org/unup/CD-ROM/Urban-Rural-Population.htm> (accessed 15 Dec2013).
- 16 Guillaume M. Defining obesity in childhood: current practice. *Am J Clin Nutr* 1999; **70**: 126S–130S.

- 17 A simple guide to classifying body mass index in children. London, UK, National Obesity Observatory, 2011 [http://www.noo.org.uk/uploads/doc/vid\\_11762\\_classifyingBMIinchildren.pdf](http://www.noo.org.uk/uploads/doc/vid_11762_classifyingBMIinchildren.pdf).
- 18 Ministry of Health and Welfare, Taiwan. Health 99 Educ. Resour. <http://health99.doh.gov.tw/TXT/PreciousLifeZone/print.aspx?TopIcNo=52&DS=1-Article> (accessed 25 Nov2013).
- 19 Wang Y, Lobstein T. Worldwide trends in childhood overweight and obesity. *Int J Pediatr Obes* 2006; **1**: 11–25.
- 20 Cole TJ, Lobstein T. Extended international (IOTF) body mass index cut-offs for thinness, overweight and obesity. *Pediatr Obes* 2012; **7**: 284–94.
- 21 Cole TJ, Bellizzi MC, Flegal KM, Dietz WH. Establishing a standard definition for child overweight and obesity worldwide: international survey. *BMJ* 2000; **320**: 1240.
- 22 Cole TJ, Flegal KM, Nicholls D, Jackson AA. Body mass index cut offs to define thinness in children and adolescents: international survey. *BMJ* 2007; **335**: 194.
- 23 WHO Multicentre Growth Reference Study Group. WHO Child Growth Standards based on length/height, weight and age. *Acta Paediatr Oslo Nor* 1992 *Suppl* 2006; **450**: 76–85.
- 24 Training Course on Child Growth Assessment -- WHO Child Growth Standards (Module C). Geneva, Switzerland, World Health Organization, 2008 [http://www.who.int/childgrowth/training/module\\_c\\_interpreting\\_indicators.pdf](http://www.who.int/childgrowth/training/module_c_interpreting_indicators.pdf).
- 25 WHO | Development of a WHO growth reference for school-aged children and adolescents. WHO. [http://www.who.int/growthref/growthref\\_who\\_bull/en/index.html](http://www.who.int/growthref/growthref_who_bull/en/index.html) (accessed 22 Dec2013).
- 26 Rolland-Cachera MF, Group F the ECO. Childhood obesity: current definitions and recommendations for their use. *Int J Pediatr Obes* 2011; **6**: 325–31.
- 27 O'Neill JL, McCarthy SN, Burke SJ, *et al.* Prevalence of overweight and obesity in Irish school children, using four different definitions. *Eur J Clin Nutr* 2007; **61**: 743–51.
- 28 Monasta L, Lobstein T, Cole TJ, Vignerová J, Cattaneo A. Defining overweight and obesity in pre-school children: IOTF reference or WHO standard? *Obes Rev* 2011; **12**: 295–300.
- 29 Jeffery RW. Bias in reported body weight as a function of education, occupation, health and weight concern. *Addict Behav* 1996; **21**: 217–22.
- 30 Engstrom JL, Paterson SA, Doherty A, Trabulsi M, Speer KL. Accuracy of Self-Reported Height and Weight in Women: An Integrative Review of the Literature. *J Midwifery Women's Health* 2003; **48**: 338–45.
- 31 Maheu-Giroux M, Casapía M, Gyorkos TW. On the validity of self-reports and indirect reports to ascertain malaria prevalence in settings of hypoendemicity. *Soc Sci Med* 2011; **72**: 635–40.



- 32 Wen M, Kowaleski-Jones L. Sex and Ethnic Differences in Validity of Self-reported Adult Height, Weight and Body Mass Index. *Ethn Dis* 2012; **22**: 72–8.
- 33 KUCZMARSKI MF, KUCZMARSKI RJ, NAJJAR M. Effects of Age on Validity of Self-Reported Height, Weight, and Body Mass Index: Findings from the Third National Health and Nutrition Examination Survey, 1988–1994. *J Am Diet Assoc* 2001; **101**: 28–34.
- 34 Stevens GA, Singh GM, Lu Y, *et al*. National, regional, and global trends in adult overweight and obesity prevalences. *Popul Health Metr* 2012; **10**: 22.
- 35 Lozano R, Naghavi M, Foreman K, *et al*. Global and regional mortality from 235 causes of death for 20 age groups in 1990 and 2010: a systematic analysis for the Global Burden of Disease Study 2010. *Lancet* 2012; **380**: 2095–128.
- 36 Ng M, Freeman MK, Fleming TD, *et al*. Smoking prevalence and cigarette consumption in 187 countries, 1980-2012. *JAMA* 2014; **311**: 183–92.
- 37 Rasmussen C, Williams C. Gaussian Processes for Machine Learning. , Mit Press, 2006.
- 38 Vasudevan S, Ramos F, Nettleton E, Durrant-Whyte H. Heteroscedastic Gaussian processes for data fusion in large scale terrain modeling. In: 2010 IEEE International Conference on Robotics and Automation (ICRA). , 2010: 3452–9.
- 39 Food Balance Sheets. FAOSTAT. <http://faostat.fao.org/site/354/default.aspx> (accessed 27 Jan2014).
- 40 Bleich SN, Cutler D, Murray C, Adams A. Why Is the Developed World Obese? *Annu Rev Public Health* 2008; **29**: 273–95.
- 41 Fox J. Applied Regression Analysis and Generalized Linear Models. , SAGE, 2008.
- 42 Keele LJ. Semiparametric Regression for the Social Sciences. , John Wiley & Sons, 2008.
- 43 Foreman KJ, Lozano R, Lopez AD, Murray CJ. Modeling causes of death: an integrated approach using CODEm. *Popul Health Metr* 2012; **10**: 1.

**Webtable 7:** List of sources used in the current analysis

| Country Name   | Survey Name                                                                                                                                                                                   | Years                        |
|----------------|-----------------------------------------------------------------------------------------------------------------------------------------------------------------------------------------------|------------------------------|
| Afghanistan    | Multiple Indicator Cluster Survey (MICS)                                                                                                                                                      | 2010                         |
| Albania        | Multiple Indicator Cluster Survey (MICS)                                                                                                                                                      | 2000, 2005                   |
| Albania        | Demographic and Health Survey (DHS)                                                                                                                                                           | 2008                         |
| Albania        | World Bank - Living Standards and Measurement Survey (LSMS)                                                                                                                                   | 2002                         |
| Albania        | Borici S, Agaoglu NB, Baykan OA, Agirbasli M. Blood pressure and anthropometric measurements in Albanian versus Turkish children and adolescents. <i>Acta Cardiol.</i> 2009 Dec;64(6):747–54. | 2007                         |
| Algeria        | STEPS Noncommunicable Disease Risk Factors Survey                                                                                                                                             | 2003                         |
| Algeria        | WHO STEPS Global School-Based Health Survey (GSHS)                                                                                                                                            | 2010                         |
| American Samoa | Davison N, Fanolua S, Rosaine M, Vargo DL. Assessing overweight and obesity in American Samoan adolescents. <i>Pac Health Dialog.</i> 2007 Sep;14(2):55–61.                                   | 2005                         |
| Andorra        | ENSA - National Health Survey                                                                                                                                                                 | 1991, 1997, 2002, 2004, 2011 |
| Angola         | Multiple Indicator Cluster Survey (MICS)                                                                                                                                                      | 2001                         |
| Argentina      | WHO STEPS Global School-Based Health Survey (GSHS)                                                                                                                                            | 2007                         |
| Armenia        | Demographic and Health Survey (DHS)                                                                                                                                                           | 2000, 2005, 2010             |
| Armenia        | Health Behaviour in School-Aged Children 2009/2010                                                                                                                                            | 2009                         |
| Australia      | Australia Risk Prevalence Survey                                                                                                                                                              | 1989                         |

| Country Name | Survey Name                                                                                                                                                                                                                | Years                        |
|--------------|----------------------------------------------------------------------------------------------------------------------------------------------------------------------------------------------------------------------------|------------------------------|
| Australia    | Australia Longitudinal Study of Children 2009-2010                                                                                                                                                                         | 2004, 2006, 2008, 2010       |
| Australia    | World Health Survey (WHS)                                                                                                                                                                                                  | 2003                         |
| Australia    | Australia Diabetes Obesity and Lifestyle Study                                                                                                                                                                             | 1999, 2004                   |
| Australia    | Australia National Health Survey                                                                                                                                                                                           | 1995, 2001, 2004, 2007, 2011 |
| Australia    | International Social Survey Programme (ISSP)                                                                                                                                                                               | 2012                         |
| Australia    | Australia Nutrition Survey                                                                                                                                                                                                 | 1995                         |
| Australia    | Ackerman IN, Osborne RH. Obesity and increased burden of hip and knee joint disease in Australia: results from a national survey. BMC Musculoskelet Disord. 2012;13:254.                                                   | 2009                         |
| Australia    | Booth ML, Dobbins T, Okely AD, Denney-Wilson E, Hardy LL. Trends in the prevalence of overweight and obesity among young Australians, 1985, 1997, and 2004. Obesity (Silver Spring). 2007 May;15(5):1089-95.               | 2004                         |
| Australia    | Booth ML, Okely AD, Denney-Wilson E. Validation and application of a novel method of measuring non-response bias in school-based surveys of paediatric overweight and obesity. Int J Pediatr Obes. 2011 Jun;6(2-2):e87-93. | 2004                         |
| Australia    | Booth ML, Wake M, Armstrong T, Chey T, Hesketh K, Mathur S. The epidemiology of overweight and obesity among Australian children and adolescents, 1995-97. Aust N Z J Public Health. 2001 Apr;25(2):162-9.                 | 1997                         |

| Country Name | Survey Name                                                                                                                                                                                                                               | Years      |
|--------------|-------------------------------------------------------------------------------------------------------------------------------------------------------------------------------------------------------------------------------------------|------------|
| Australia    | Davies CA, Vandelanotte C, Duncan MJ, van Uffelen JGZ. Associations of physical activity and screen-time on health related quality of life in adults. <i>Prev Med.</i> 2012 Jul;55(1):46–9.                                               | 2008       |
| Australia    | Goldney RD, Dunn KI, Air TM, Dal Grande E, Taylor AW. Relationships between body mass index, mental health, and suicidal ideation: population perspective using two methods. <i>Aust N Z J Psychiatry.</i> 2009 Jul;43(7):652–8.          | 2002, 2008 |
| Australia    | Hardy LL, Grunseit A, Khambalia A, Bell C, Wolfenden L, Milat AJ. Co-occurrence of obesogenic risk factors among adolescents. <i>J Adolesc Health.</i> 2012 Sep;51(3):265–71.                                                             | 2007       |
| Australia    | Hesketh K, Wake M, Waters E, Carlin J, Crawford D. Stability of body mass index in Australian children: a prospective cohort study across the middle childhood years. <i>Public Health Nutr.</i> 2004 Apr;7(2):303–9.                     | 1997, 2000 |
| Australia    | Holden CA, McLachlan RI, Pitts M, Cumming R, Wittert G, Ehsani JP, de Kretser DM, Handelsman DJ. Determinants of male reproductive health disorders: the Men in Australia Telephone Survey (MATeS). <i>BMC Public Health.</i> 2010;10:96. | 2003       |
| Australia    | Khambalia A, Hardy LL, Bauman A. Accuracy of weight perception, life-style behaviours and psychological distress among overweight and obese adolescents. <i>J Paediatr Child Health.</i> 2012 Mar;48(3):220–7.                            | 2008       |

| Country Name | Survey Name                                                                                                                                                                                                                                                 | Years      |
|--------------|-------------------------------------------------------------------------------------------------------------------------------------------------------------------------------------------------------------------------------------------------------------|------------|
| Australia    | Kortt MA, Dollery B. Association between body mass index and health-related quality of life among an Australian sample. Clin Ther. 2011 Oct;33(10):1466–74.                                                                                                 | 2007, 2009 |
| Australia    | Magarey AM, Daniels LA, Boulton TJ. Prevalence of overweight and obesity in Australian children and adolescents: reassessment of 1985 and 1995 data against new standard international definitions. Med. J. Aust. 2001 Jun 4;174(11):561–4.                 | 1985       |
| Australia    | Markwick A, Vaughan L, Ansari Z. Opposing socioeconomic gradients in overweight and obese adults. Aust N Z J Public Health. 2013 Feb;37(1):32–8.                                                                                                            | 2008       |
| Australia    | Morley BC, Scully ML, Niven PH, Okely AD, Baur LA, Pratt IS, Wakefield MA, NaSSDA Study Team. What factors are associated with excess body weight in Australian secondary school students? Med. J. Aust. 2012 Feb 20;196(3):189–92.                         | 2009       |
| Australia    | O'Dea JA, Amy NK. Perceived and desired weight, weight related eating and exercising behaviours, and advice received from parents among thin, overweight, obese or normal weight Australian children and adolescents. Int J Behav Nutr Phys Act. 2011;8:68. | 2006       |

| Country Name | Survey Name                                                                                                                                                                                                                    | Years            |
|--------------|--------------------------------------------------------------------------------------------------------------------------------------------------------------------------------------------------------------------------------|------------------|
| Australia    | Patton GC, Coffey C, Carlin JB, Sawyer SM, Williams J, Olsson CA, Wake M. Overweight and obesity between adolescence and young adulthood: a 10-year prospective cohort study. <i>J Adolesc Health</i> . 2011 Mar;48(3):275–80. | 1993, 1998, 2001 |
| Australia    | Renzaho A, Wooden M, Houn B. Associations between body mass index and health-related quality of life among Australian adults. <i>Qual Life Res</i> . 2010 May;19(4):515–20.                                                    | 2001             |
| Australia    | Sanigorski AM, Bell AC, Kremer PJ, Swinburn BA. High childhood obesity in an Australian population. <i>Obesity (Silver Spring)</i> . 2007 Aug;15(8):1908–12.                                                                   | 2003             |
| Australia    | Shi Z, Taylor AW, Gill TK, Tuckerman J, Adams R, Martin J. Short sleep duration and obesity among Australian children. <i>BMC Public Health</i> . 2010;10:609.                                                                 | 2004             |
| Australia    | Siu J, Giskes K, Shaw J, Turrell G. Perceived weight status may contribute to education inequalities in five-year weight change among mid-aged women. <i>Aust N Z J Public Health</i> . 2011 Jun;35(3):284–91.                 | 1999             |
| Australia    | Tai A, Volkmer R, Burton A. Association between asthma symptoms and obesity in preschool (4-5 year old) children. <i>J Asthma</i> . 2009 May;46(4):362–5.                                                                      | 2006             |

| Country Name | Survey Name                                                                                                                                                                                                                                       | Years            |
|--------------|---------------------------------------------------------------------------------------------------------------------------------------------------------------------------------------------------------------------------------------------------|------------------|
| Australia    | Vaska V, Volkmer R. Increasing prevalence of obesity in South Australian 4-year-olds: 1995-2002. J Paediatr Child Health. 2004 Jul;40(7):353-5.                                                                                                   | 1995-2002        |
| Australia    | Wake M, Hardy P, Canterford L, Sawyer M, Carlin JB. Overweight, obesity and girth of Australian preschoolers: prevalence and socio-economic correlates. Int J Obes (Lond). 2007 Jul;31(7):1044-51.                                                | 2004             |
| Australia    | Wake M, Hardy P, Sawyer MG, Carlin JB. Comorbidities of overweight/obesity in Australian preschoolers: a cross-sectional population study. Arch. Dis. Child. 2008 Jun;93(6):502-7.                                                                | 2004             |
| Austria      | Austrian Health Survey                                                                                                                                                                                                                            | 1999, 2006       |
| Austria      | Health Behaviour in School-Aged Children 2001/2002                                                                                                                                                                                                | 2001, 2005, 2009 |
| Austria      | Eurobarometer                                                                                                                                                                                                                                     | 2005             |
| Austria      | Survey of Health, Ageing and Retirement in Europe (SHARE)                                                                                                                                                                                         | 2004, 2007, 2011 |
| Austria      | International Social Survey Programme (ISSP)                                                                                                                                                                                                      | 2007             |
| Austria      | Österreichische Ernährungsbericht [Austrian Nutrition Report]                                                                                                                                                                                     | 2008             |
| Austria      | Ottova V, Erhart M, Rajmil L, Dettenborn-Betz L, Ravens-Sieberer U. Overweight and its impact on the health-related quality of life in children and adolescents: results from the European KIDSCREEN survey. Qual Life Res. 2012 Feb;21(1):59-69. | 2003             |

| Country Name      | Survey Name                                                                                                                                                                                                                                                                                                                                 | Years |
|-------------------|---------------------------------------------------------------------------------------------------------------------------------------------------------------------------------------------------------------------------------------------------------------------------------------------------------------------------------------------|-------|
| <b>Austria</b>    | Schwarz B, Bischof HP, Kunze M. Overweight and coronary risk factors results from a western Austrian survey. <i>Soz Praventivmed.</i> 1991;36(6):322–6.                                                                                                                                                                                     | 1986  |
| <b>Austria</b>    | Yngve A, De Bourdeaudhuij I, Wolf A, Grijbovski A, Brug J, Due P, Ehrenblad B, Elmadfa I, Franchini B, Klepp K-I, Poortvliet E, Rasmussen M, Thorsdottir I, Perez Rodrigo C. Differences in prevalence of overweight and stunting in 11-year olds across Europe: The Pro Children Study. <i>Eur J Public Health.</i> 2008 Apr;18(2):126–30. | 2003  |
| <b>Azerbaijan</b> | Multiple Indicator Cluster Survey (MICS)                                                                                                                                                                                                                                                                                                    | 2000  |
| <b>Azerbaijan</b> | Azerbaijan Reproductive Health Survey 2001                                                                                                                                                                                                                                                                                                  | 2001  |
| <b>Azerbaijan</b> | Demographic and Health Survey (DHS)                                                                                                                                                                                                                                                                                                         | 2006  |
| <b>Bahrain</b>    | National Nutrition Survey                                                                                                                                                                                                                                                                                                                   | 2002  |
| <b>Bahrain</b>    | STEPS Noncommunicable Disease Risk Factors Survey                                                                                                                                                                                                                                                                                           | 2007  |
| <b>Bahrain</b>    | Al-Raees GY, Al-Amer MA, MUSAIGER AO, D'SOUZA R. Prevalence of overweight and obesity among children aged 2-5 years in Bahrain: a comparison between two reference standards. <i>Int J Pediatr Obes.</i> 2009;4(4):414–6.                                                                                                                   | 2006  |
| <b>Bahrain</b>    | Al-Sendi AM, Shetty P, MUSAIGER AO. Prevalence of overweight and obesity among Bahraini adolescents: a comparison between three different sets of criteria. <i>Eur J Clin Nutr.</i> 2003 Mar;57(3):471–4.                                                                                                                                   | 2000  |



| Country Name      | Survey Name                                                                                                                                                                            | Years                        |
|-------------------|----------------------------------------------------------------------------------------------------------------------------------------------------------------------------------------|------------------------------|
| <b>Bahrain</b>    | Musaiger AO, Al-Mannai MA. Weight, height, body mass index and prevalence of obesity among the adult population in Bahrain. <i>Ann. Hum. Biol.</i> 2001 Jun;28(3):346–50.              | 1988                         |
| <b>Bangladesh</b> | STEPS Noncommunicable Disease Risk Factors Survey                                                                                                                                      | 2009                         |
| <b>Bangladesh</b> | Demographic and Health Survey (DHS)                                                                                                                                                    | 1996, 1999, 2004, 2007, 2011 |
| <b>Bangladesh</b> | BRAVE Study from Chowdbury et al                                                                                                                                                       | 2012                         |
| <b>Barbados</b>   | STEPS Noncommunicable Disease Risk Factors Survey                                                                                                                                      | 2007                         |
| <b>Barbados</b>   | Gaskin PS, Broome H, Alert C, Fraser H. Misperceptions, inactivity and maternal factors may drive obesity among Barbadian adolescents. <i>Public Health Nutr.</i> 2008 Jan;11(1):41–8. | 2004                         |
| <b>Barbados</b>   | Nemesure B, Wu S-Y, Hennis A, Leske MC. Nine-year incidence of obesity and overweight in an African-origin population. <i>Int J Obes (Lond).</i> 2008 Feb;32(2):329–35.                | 1987, 1997                   |
| <b>Barbados</b>   | Barbados Food Consumption and Anthropometric Survey                                                                                                                                    | 2000                         |
| <b>Belarus</b>    | Multiple Indicator Cluster Survey (MICS)                                                                                                                                               | 2005                         |
| <b>Belgium</b>    | Health Behaviour in School-Aged Children                                                                                                                                               | 2001, 2005, 2009             |
| <b>Belgium</b>    | Eurobarometer                                                                                                                                                                          | 1989, 2005                   |
| <b>Belgium</b>    | Survey of Health, Ageing and Retirement in Europe (SHARE)                                                                                                                              | 2004, 2007, 2011             |
| <b>Belgium</b>    | Health Interview Survey                                                                                                                                                                | 1997, 2001, 2004, 2008       |

| Country Name | Survey Name                                                                                                                                                                                                                                                                                                                | Years |
|--------------|----------------------------------------------------------------------------------------------------------------------------------------------------------------------------------------------------------------------------------------------------------------------------------------------------------------------------|-------|
| Belgium      | Belgium Food Consumption Survey 2004                                                                                                                                                                                                                                                                                       | 2004  |
| Belgium      | Brug J, van Stralen MM, Te Velde SJ, Chinapaw MJM, De Bourdeaudhuij I, Lien N, Bere E, Maskini V, Singh AS, Maes L, Moreno L, Jan N, Kovacs E, Lobstein T, Manios Y. Differences in weight status and energy-balance related behaviors among schoolchildren across Europe: the ENERGY-project. PLoS ONE. 2012;7(4):e34742. | 2010  |
| Belgium      | Duvigneaud N, Wijndaele K, Matton L, Deriemaeker P, Philippaerts R, Lefevre J, Thomis M, Duquet W. Socio-economic and lifestyle factors associated with overweight in Flemish adult men and women. BMC Public Health. 2007;7:23.                                                                                           | 2002  |
| Belgium      | Lin Y, Bolca S, Vandevijvere S, De Vriese S, Mouratidou T, De Neve M, Polet A, Van Oyen H, Van Camp J, De Backer G, De Henauw S, Huybrechts I. Plant and animal protein intake and its association with overweight and obesity among the Belgian population. Br. J. Nutr. 2011 Apr;105(7):1106-16.                         | 2004  |
| Belgium      | Roskam A-JR, Kunst AE. The predictive value of different socio-economic indicators for overweight in nine European countries. Public Health Nutr. 2008 Dec;11(12):1256-66.                                                                                                                                                 | 2000  |

| Country Name   | Survey Name                                                                                                                                                                                                                                                                                                                                                                         | Years            |
|----------------|-------------------------------------------------------------------------------------------------------------------------------------------------------------------------------------------------------------------------------------------------------------------------------------------------------------------------------------------------------------------------------------|------------------|
| <b>Belgium</b> | Stam-Moraga MC, Kolanowski J, Dramaix M, De Backer G, Kornitzer MD. Sociodemographic and nutritional determinants of obesity in Belgium. <i>Int. J. Obes. Relat. Metab. Disord.</i> 1999 Feb;23 Suppl 1:1-9.                                                                                                                                                                        | 1979             |
| <b>Belgium</b> | Wijnhoven TMA, van Raaij JMA, Spinelli A, Rito AI, Hovengen R, Kunesova M, Starc G, Rutter H, Sjöberg A, Petrauskiene A, O'Dwyer U, Petrova S, Farrugia Sant'angelo V, Wauters M, Yngve A, Rubana I-M, Breda J. WHO European Childhood Obesity Surveillance Initiative 2008: weight, height and body mass index in 6-9-year-old children. <i>Pediatr Obes.</i> 2013 Apr;8(2):79-97. | 2007             |
| <b>Belgium</b> | Yngve A, De Bourdeaudhuij I, Wolf A, Grjibovski A, Brug J, Due P, Ehrenblad B, Elmadfa I, Franchini B, Klepp K-I, Poortvliet E, Rasmussen M, Thorsdottir I, Perez Rodrigo C. Differences in prevalence of overweight and stunting in 11-year olds across Europe: The Pro Children Study. <i>Eur J Public Health.</i> 2008 Apr;18(2):126-30.                                         | 2003             |
| <b>Belize</b>  | Iniciativa Centroamericana de Diabetes (CAMDI)                                                                                                                                                                                                                                                                                                                                      | 2005             |
| <b>Belize</b>  | Multiple Indicator Cluster Survey (MICS)                                                                                                                                                                                                                                                                                                                                            | 2006, 2011       |
| <b>Benin</b>   | WHO STEPS Global School-Based Health Survey (GSHS)                                                                                                                                                                                                                                                                                                                                  | 2009             |
| <b>Benin</b>   | Demographic and Health Survey (DHS)                                                                                                                                                                                                                                                                                                                                                 | 1996, 2001, 2006 |
| <b>Bhutan</b>  | Multiple Indicator Cluster Survey (MICS)                                                                                                                                                                                                                                                                                                                                            | 2010             |

| Country Name                  | Survey Name                                                                                                                                                                                         | Years                                    |
|-------------------------------|-----------------------------------------------------------------------------------------------------------------------------------------------------------------------------------------------------|------------------------------------------|
| <b>Bolivia</b>                | Demographic and Health Survey (DHS)                                                                                                                                                                 | 1989, 1993, 1998, 2003, 2008             |
| <b>Bosnia and Herzegovina</b> | Multiple Indicator Cluster Survey (MICS)                                                                                                                                                            | 2000, 2006, 2011                         |
| <b>Bosnia and Herzegovina</b> | Federation of Bosnia and Herzegovina Noncommunicable Disease Risk Factor Survey 2002                                                                                                                | 2002                                     |
| <b>Bosnia and Herzegovina</b> | World Health Survey (WHS)                                                                                                                                                                           | 2003                                     |
| <b>Bosnia and Herzegovina</b> | Pilav A, Nissinen A, Haukkala A, Niksic D, Laatikainen T. Cardiovascular risk factors in the Federation of Bosnia and Herzegovina. Eur J Public Health. 2007 Feb;17(1):75–9.                        | 2002                                     |
| <b>Botswana</b>               | STEPS Noncommunicable Disease Risk Factors Survey                                                                                                                                                   | 2007                                     |
| <b>Brazil</b>                 | World Bank - Living Standards and Measurement Survey (LSMS)                                                                                                                                         | 1996                                     |
| <b>Brazil</b>                 | Demographic and Health Survey (DHS)                                                                                                                                                                 | 1986, 1996                               |
| <b>Brazil</b>                 | VIGILÂNCIA DE FATORES DE RISCO E PROTEÇÃO PARA DOENÇAS CRÔNICAS POR INQUÉRITO TELEFÔNICO (VIGITEL) [Surveillance of Risk Factors for Chronic Diseases and Protection by Telephone Survey (VIGITEL)] | 2006, 2007, 2008, 2009, 2010, 2011, 2012 |
| <b>Brazil</b>                 | Demographic and Health Survey                                                                                                                                                                       | 2006                                     |
| <b>Brazil</b>                 | Risk Factor Morbidity NCD Survey                                                                                                                                                                    | 2002, 2003, 2004, 2005                   |
| <b>Brazil</b>                 | Abrantes MM, Lamounier JA, Colosimo EA. Prevalência de sobrepeso e obesidade nas regiões Nordeste e Sudeste do Brasil. Revista da Associação Médica Brasileira (1992). 2003;49(2).                  | 1997                                     |

| Country Name        | Survey Name                                                                                                                                                                                                                                                                                                                                                                  | Years                  |
|---------------------|------------------------------------------------------------------------------------------------------------------------------------------------------------------------------------------------------------------------------------------------------------------------------------------------------------------------------------------------------------------------------|------------------------|
| <b>Brazil</b>       | Dalla Vecchia CF, Susin C, Rösing CK, Oppermann RV, Albandar JM. Overweight and obesity as risk indicators for periodontitis in adults. J. Periodontol. 2005 Oct;76(10):1721–8.                                                                                                                                                                                              | 2001                   |
| <b>Brazil</b>       | Jaime PC, Duran AC, Sarti FM, Lock K. Investigating environmental determinants of diet, physical activity, and overweight among adults in Sao Paulo, Brazil. J Urban Health. 2011 Jun;88(3):567–81.                                                                                                                                                                          | 2003                   |
| <b>Bulgaria</b>     | Health Behaviour in School-Aged Children 2005/2006                                                                                                                                                                                                                                                                                                                           | 2005                   |
| <b>Bulgaria</b>     | Eurobarometer                                                                                                                                                                                                                                                                                                                                                                | 2005                   |
| <b>Bulgaria</b>     | International Social Survey Programme (ISSP)                                                                                                                                                                                                                                                                                                                                 | 2007, 2011             |
| <b>Bulgaria</b>     | European Health Interview Survey                                                                                                                                                                                                                                                                                                                                             | 2008                   |
| <b>Bulgaria</b>     | Wijnhoven TMA, van Raaij JMA, Spinelli A, Rito AI, Hovengen R, Kunesova M, Starc G, Rutter H, Sjöberg A, Petrauskiene A, O'Dwyer U, Petrova S, Farrugia Sant'angelo V, Wauters M, Yngve A, Rubana I-M, Breda J. WHO European Childhood Obesity Surveillance Initiative 2008: weight, height and body mass index in 6-9-year-old children. Pediatr Obes. 2013 Apr;8(2):79–97. | 2007                   |
| <b>Burkina Faso</b> | Multiple Indicator Cluster Survey (MICS)                                                                                                                                                                                                                                                                                                                                     | 2006                   |
| <b>Burkina Faso</b> | Demographic and Health Survey (DHS)                                                                                                                                                                                                                                                                                                                                          | 1992, 1998, 2003, 2010 |
| <b>Burundi</b>      | Demographic and Health Survey (DHS)                                                                                                                                                                                                                                                                                                                                          | 1987, 2010             |
| <b>Burundi</b>      | Multiple Indicator Cluster Survey (MICS)                                                                                                                                                                                                                                                                                                                                     | 2000                   |
| <b>Cambodia</b>     | Cambodia Anthropometric Survey (CAS)                                                                                                                                                                                                                                                                                                                                         | 2008                   |

| Country Name    | Survey Name                                                                                                                                                                                                     | Years                                                |
|-----------------|-----------------------------------------------------------------------------------------------------------------------------------------------------------------------------------------------------------------|------------------------------------------------------|
| <b>Cambodia</b> | STEPS Noncommunicable Disease Risk Factors Survey                                                                                                                                                               | 2010                                                 |
| <b>Cambodia</b> | Demographic and Health Survey (DHS)                                                                                                                                                                             | 2000, 2005, 2010                                     |
| <b>Cameroon</b> | Multiple Indicator Cluster Survey (MICS)                                                                                                                                                                        | 2006                                                 |
| <b>Cameroon</b> | Demographic and Health Survey (DHS)                                                                                                                                                                             | 1991, 1998, 2004, 2011                               |
| <b>Cameroon</b> | Fezeu L, Minkoulou E, Balkau B, Kengne A-P, Awah P, Unwin N, Alberti GKMM, Mbanya J-C. Association between socioeconomic status and adiposity in urban Cameroon. <i>Int J Epidemiol.</i> 2006 Feb;35(1):105–11. | 2000                                                 |
| <b>Canada</b>   | National Population Health Survey                                                                                                                                                                               | 1994, 1996, 1998                                     |
| <b>Canada</b>   | Canada Heart Health Database                                                                                                                                                                                    | 1989                                                 |
| <b>Canada</b>   | Canadian Community Health Survey                                                                                                                                                                                | 2000, 2003, 2004, 2005, 2008, 2009, 2010, 2011, 2012 |
| <b>Canada</b>   | Canadian Health Measures Survey (CHMS)                                                                                                                                                                          | 2004, 2007, 2009                                     |
| <b>Canada</b>   | Health Behaviour in School-Aged Children                                                                                                                                                                        | 2001, 2005, 2009                                     |
| <b>Canada</b>   | Canning PM, Courage ML, Frizzell LM. Prevalence of overweight and obesity in a provincial population of Canadian preschool children. <i>CMAJ.</i> 2004 Aug 3;171(3):240–2.                                      | 2002                                                 |
| <b>Canada</b>   | Herman KM, Craig CL, Gauvin L, Katzmarzyk PT. Tracking of obesity and physical activity from childhood to adulthood: the Physical Activity Longitudinal Study. <i>Int J Pediatr Obes.</i> 2009;4(4):281–8.      | 2002                                                 |

| Country Name | Survey Name                                                                                                                                                                                                                                           | Years |
|--------------|-------------------------------------------------------------------------------------------------------------------------------------------------------------------------------------------------------------------------------------------------------|-------|
| Canada       | Herman KM, Hopman WM, Craig CL. Are youth BMI and physical activity associated with better or worse than expected health-related quality of life in adulthood? The Physical Activity Longitudinal Study. <i>Qual Life Res.</i> 2010 Apr;19(3):339–49. | 2002  |
| Canada       | Janssen I, Boyce WF, Simpson K, Pickett W. Influence of individual- and area-level measures of socioeconomic status on obesity, unhealthy eating, and physical inactivity in Canadian adolescents. <i>Am. J. Clin. Nutr.</i> 2006 Jan;83(1):139–45.   | 2001  |
| Canada       | Joffres MR, Hamet P, Rabkin SW, Gelskey D, Hogan K, Fodor G. Prevalence, control and awareness of high blood pressure among Canadian adults. Canadian Heart Health Surveys Research Group. <i>CMAJ.</i> 1992 Jun 1;146(11):1997–2005.                 | 1986  |
| Canada       | Simen-Kapeu A, Kuhle S, Veugelers PJ. Geographic differences in childhood overweight, physical activity, nutrition and neighbourhood facilities: implications for prevention. <i>Can J Public Health.</i> 2010 Apr;101(2):128–32.                     | 2008  |

| Country Name             | Survey Name                                                                                                                                                                                                                                              | Years                                          |
|--------------------------|----------------------------------------------------------------------------------------------------------------------------------------------------------------------------------------------------------------------------------------------------------|------------------------------------------------|
| Canada                   | Tudor-Locke C, Craig CL, Cameron C, Griffiths JM. Canadian children's and youth's pedometer-determined steps/day, parent-reported TV watching time, and overweight/obesity: the CANPLAY Surveillance Study. <i>Int J Behav Nutr Phys Act.</i> 2011;8:66. | 2005                                           |
| Canada                   | Veugelers P, Sithole F, Zhang S, Muhajarine N. Neighborhood characteristics in relation to diet, physical activity and overweight of Canadian children. <i>Int J Pediatr Obes.</i> 2008;3(3):152-9.                                                      | 2003                                           |
| Canada                   | Wu XY, Ohinmaa A, Veugelers PJ. Diet quality, physical activity, body weight and health-related quality of life among grade 5 students in Canada. <i>Public Health Nutr.</i> 2012 Jan;15(1):75-81.                                                       | 2008                                           |
| Cape Verde               | STEPS Noncommunicable Disease Risk Factors Survey                                                                                                                                                                                                        | 2007                                           |
| Central African Republic | Demographic and Health Survey (DHS)                                                                                                                                                                                                                      | 1994                                           |
| Central African Republic | Multiple Indicator Cluster Survey (MICS)                                                                                                                                                                                                                 | 2000, 2006, 2010                               |
| Chad                     | Multiple Indicator Cluster Survey (MICS)                                                                                                                                                                                                                 | 2000                                           |
| Chad                     | Demographic and Health Survey (DHS)                                                                                                                                                                                                                      | 1996, 2004                                     |
| Chile                    | Chile National Health Survey                                                                                                                                                                                                                             | 2003, 2009                                     |
| Chile                    | International Social Survey Programme (ISSP)                                                                                                                                                                                                             | 2011                                           |
| China                    | WHO Multicountry Survey on Health and Health System Responsiveness                                                                                                                                                                                       | 2000                                           |
| China                    | China Health and Nutrition Survey                                                                                                                                                                                                                        | 1989, 1991, 1993, 1997, 2000, 2004, 2006, 2009 |



| Country Name | Survey Name                                                                                                                                                                                                                                                                          | Years |
|--------------|--------------------------------------------------------------------------------------------------------------------------------------------------------------------------------------------------------------------------------------------------------------------------------------|-------|
| China        | WHO Study on Global Ageing and Adult Health (SAGE)                                                                                                                                                                                                                                   | 2007  |
| China        | China Health and Family Life Survey 1999-2000                                                                                                                                                                                                                                        | 1999  |
| China        | Chen Z, Yang G, Zhou M, Smith M, Offer A, Ma J, Wang L, Pan H, Whitlock G, Collins R, Niu S, Peto R. Body mass index and mortality from ischaemic heart disease in a lean population: 10 year prospective study of 220,000 adult men. <i>Int J Epidemiol.</i> 2006 Feb;35(1):141–50. | 1990  |
| China        | Gu D, Reynolds K, Wu X, Chen J, Duan X, Reynolds RF, Whelton PK, He J, InterASIA Collaborative Group. Prevalence of the metabolic syndrome and overweight among adults in China. <i>Lancet.</i> 2005 Apr 16;365(9468):1398–405.                                                      | 2000  |
| China        | Jiang J, Rosenqvist U, Wang H, Greiner T, Ma Y, Toshcke AM. Risk factors for overweight in 2- to 6-year-old children in Beijing, China. <i>Int J Pediatr Obes.</i> 2006;1(2):103–8.                                                                                                  | 2004  |
| China        | Ko GTC, Ozaki R, Wong GWK, Kong APS, So W-Y, Tong PCY, Chan MHM, Ho C-S, Lam CWK, Chan JCN. The problem of obesity among adolescents in Hong Kong: a comparison using various diagnostic criteria. <i>BMC Pediatr.</i> 2008;8:10.                                                    | 2003  |
| China        | Li Y, Schouten EG, Hu X, Cui Z, Luan D, Ma G. Obesity prevalence and time trend among youngsters in China, 1982-2002. <i>Asia Pac J Clin Nutr.</i> 2008;17(1):131–7.                                                                                                                 | 1982  |

| Country Name | Survey Name                                                                                                                                                                                                                                                       | Years      |
|--------------|-------------------------------------------------------------------------------------------------------------------------------------------------------------------------------------------------------------------------------------------------------------------|------------|
| China        | Reynolds K, Gu D, Whelton PK, Wu X, Duan X, Mo J, He J, InterASIA Collaborative Group. Prevalence and risk factors of overweight and obesity in China. <i>Obesity (Silver Spring)</i> . 2007 Jan;15(1):10–8.                                                      | 2000       |
| China        | Sakai R. Relationship between prevalence of childhood obesity in 17-year-olds and socioeconomic and environmental factors: prefecture-level analysis in Japan. <i>Asia Pac J Public Health</i> . 2013 Mar;25(2):159–69.                                           | 2008       |
| China        | Wildman RP, Gu D, Muntner P, Wu X, Reynolds K, Duan X, Chen C-S, Huang G, Bazzano LA, He J. Trends in overweight and obesity in Chinese adults: between 1991 and 1999-2000. <i>Obesity (Silver Spring)</i> . 2008 Jun;16(6):1448–53.                              | 1991, 1999 |
| China        | Wong JPS, Ho SY, Lai MK, Leung GM, Stewart SM, Lam TH. Overweight, obesity, weight-related concerns and behaviours in Hong Kong Chinese children and adolescents. <i>Acta Paediatr</i> . 2005 May;94(5):595–601.                                                  | 2002       |
| China        | Xiong F, Garnett SP, Cowell CT, Biesheuvel C, Zeng Y, Long C-L, Wang Q, Wang D-G, Luo Y-H, Luo S-Q. Waist circumference and waist-to-height ratio in Han Chinese children living in Chongqing, south-west China. <i>Public Health Nutr</i> . 2011 Jan;14(1):20–6. | 2004       |

| Country Name  | Survey Name                                                                                                                                                                                                        | Years                        |
|---------------|--------------------------------------------------------------------------------------------------------------------------------------------------------------------------------------------------------------------|------------------------------|
| China         | Zhang Y-X, Wang S-R. Differences in development and the prevalence of obesity among children and adolescents in different socioeconomic status districts in Shandong, China. Ann. Hum. Biol. 2012 Jul;39(4):290–6. | 2010                         |
| China         | Behavioral Risk Factor Surveillance System (BRFSS)                                                                                                                                                                 | 2004, 2007, 2010             |
| Colombia      | Colombia National Health Survey                                                                                                                                                                                    | 2007                         |
| Colombia      | STEPS Noncommunicable Disease Risk Factors Survey                                                                                                                                                                  | 2010                         |
| Colombia      | WHO Multicountry Survey on Health and Health System Responsiveness                                                                                                                                                 | 2000                         |
| Colombia      | Demographic and Health Survey (DHS)                                                                                                                                                                                | 1986, 1995, 2000, 2004, 2009 |
| Colombia      | National Survey on the Nutritional Situation                                                                                                                                                                       | 2005, 2010                   |
| Comoros       | STEPS Noncommunicable Disease Risk Factors Survey                                                                                                                                                                  | 2011                         |
| Comoros       | Multiple Indicator Cluster Survey (MICS)                                                                                                                                                                           | 2000                         |
| Comoros       | Demographic and Health Survey (DHS)                                                                                                                                                                                | 1996                         |
| Congo         | Demographic and Health Survey (DHS)                                                                                                                                                                                | 2005, 2011                   |
| Cook Islands  | WHO STEPS Global School-Based Health Survey (GSHS)                                                                                                                                                                 | 2011                         |
| Costa Rica    | Costa Rica Longevity and Healthy Aging Study (CRELES)                                                                                                                                                              | 2005, 2007                   |
| Costa Rica    | WHO STEPS Global School-Based Health Survey (GSHS)                                                                                                                                                                 | 2009                         |
| Cote d'Ivoire | STEPS Noncommunicable Disease Risk Factors Survey                                                                                                                                                                  | 2005                         |
| Cote d'Ivoire | Demographic and Health Survey (DHS)                                                                                                                                                                                | 1994, 1998, 2011             |

| Country Name  | Survey Name                                                                                                                                                                                                                                                           | Years            |
|---------------|-----------------------------------------------------------------------------------------------------------------------------------------------------------------------------------------------------------------------------------------------------------------------|------------------|
| Cote d'Ivoire | World Bank - Living Standards and Measurement Survey (LSMS)                                                                                                                                                                                                           | 1986, 1987, 1988 |
| Cote d'Ivoire | Multiple Indicator Cluster Survey (MICS)                                                                                                                                                                                                                              | 2006             |
| Croatia       | Croatia Adult Health Survey 2003                                                                                                                                                                                                                                      | 2003             |
| Croatia       | Eurobarometer                                                                                                                                                                                                                                                         | 2005             |
| Croatia       | Health Behaviour in School-Aged Children                                                                                                                                                                                                                              | 2001, 2005, 2009 |
| Croatia       | World Health Survey (WHS)                                                                                                                                                                                                                                             | 2003             |
| Croatia       | International Social Survey Programme (ISSP)                                                                                                                                                                                                                          | 2011             |
| Croatia       | Ranilovic' J, Markovina J, Znidar K, Colic' Baric' I. Attitudes to healthy eating among a representative sampling of Croatian adults: a comparison with Mediterranean countries. <i>Int J Food Sci Nutr.</i> 2009;60 Suppl 7:11–29.                                   | 2006             |
| Cuba          | Berdasco A. Body mass index values in the Cuban adult population. <i>Eur J Clin Nutr.</i> 1994 Nov;48 Suppl 3:S155–163; discussion S164.                                                                                                                              | 1982             |
| Cyprus        | European Health Interview Survey                                                                                                                                                                                                                                      | 2008             |
| Cyprus        | Eurobarometer                                                                                                                                                                                                                                                         | 2005             |
| Cyprus        | Lazarou C, Soteriades ES. Children's physical activity, TV watching and obesity in Cyprus: the CYKIDS study. <i>Eur J Public Health.</i> 2010 Feb;20(1):70–7.                                                                                                         | 2005             |
| Cyprus        | Savva SC, Tornaritis M, Chadjigeorgiou C, Kourides YA, Savva ME, Panagi A, Chriodoulou E, Kafatos A. Prevalence and socio-demographic associations of undernutrition and obesity among preschool children in Cyprus. <i>Eur J Clin Nutr.</i> 2005 Nov;59(11):1259–65. | 2004             |

| Country Name   | Survey Name                                                                                                                                                                                                                                                                                                              | Years            |
|----------------|--------------------------------------------------------------------------------------------------------------------------------------------------------------------------------------------------------------------------------------------------------------------------------------------------------------------------|------------------|
| Czech Republic | World Health Survey (WHS)                                                                                                                                                                                                                                                                                                | 2003             |
| Czech Republic | Czech Republic Sample Survey of the Health Status of the Czech Population                                                                                                                                                                                                                                                | 1999, 2002       |
| Czech Republic | Sample Survey of the Health Status of the Czech Population                                                                                                                                                                                                                                                               | 1993, 1996       |
| Czech Republic | European Health Interview Survey (EHIS) in the Czech Republic                                                                                                                                                                                                                                                            | 2008             |
| Czech Republic | International Social Survey Programme (ISSP)                                                                                                                                                                                                                                                                             | 2012             |
| Czech Republic | Survey of Health, Ageing and Retirement in Europe (SHARE)                                                                                                                                                                                                                                                                | 2007, 2011       |
| Czech Republic | Eurobarometer                                                                                                                                                                                                                                                                                                            | 2005             |
| Czech Republic | Health Behaviour in School-Aged Children                                                                                                                                                                                                                                                                                 | 2001, 2005, 2009 |
| Czech Republic | Reproductive Health Survey (RHS)                                                                                                                                                                                                                                                                                         | 1993             |
| Czech Republic | Kunešová M, Vignerová J, Parčízková J, Procházka B, Braunerová R, Riedlová J, Zamrazilová H, Hill M, Bláha P, Steflová A. Long-term changes in prevalence of overweight and obesity in Czech 7-year-old children: evaluation of different cut-off criteria of childhood obesity. <i>Obes Rev.</i> 2011 Jul;12(7):483–91. | 2008             |
| Czech Republic | Ottova V, Erhart M, Rajmil L, Dettenborn-Betz L, Ravens-Sieberer U. Overweight and its impact on the health-related quality of life in children and adolescents: results from the European KIDSCREEN survey. <i>Qual Life Res.</i> 2012 Feb;21(1):59–69.                                                                 | 2003             |

| Country Name                     | Survey Name                                                                                                                                                                                                                                                                                                                                                                         | Years                        |
|----------------------------------|-------------------------------------------------------------------------------------------------------------------------------------------------------------------------------------------------------------------------------------------------------------------------------------------------------------------------------------------------------------------------------------|------------------------------|
| Czech Republic                   | Wijnhoven TMA, van Raaij JMA, Spinelli A, Rito AI, Hovengen R, Kunesova M, Starc G, Rutter H, Sjöberg A, Petrauskiene A, O'Dwyer U, Petrova S, Farrugia Sant'angelo V, Wauters M, Yngve A, Rubana I-M, Breda J. WHO European Childhood Obesity Surveillance Initiative 2008: weight, height and body mass index in 6-9-year-old children. <i>Pediatr Obes.</i> 2013 Apr;8(2):79-97. | 2007                         |
| Democratic Republic of the Congo | Multiple Indicator Cluster Survey (MICS)                                                                                                                                                                                                                                                                                                                                            | 2001, 2010                   |
| Democratic Republic of the Congo | STEPS Noncommunicable Disease Risk Factors Survey                                                                                                                                                                                                                                                                                                                                   | 2005                         |
| Democratic Republic of the Congo | Demographic and Health Survey (DHS)                                                                                                                                                                                                                                                                                                                                                 | 2007                         |
| Denmark                          | Eurobarometer                                                                                                                                                                                                                                                                                                                                                                       | 1989, 2005                   |
| Denmark                          | International Social Survey Programme (ISSP)                                                                                                                                                                                                                                                                                                                                        | 2013                         |
| Denmark                          | Health Behaviour in School-Aged Children                                                                                                                                                                                                                                                                                                                                            | 2001, 2005, 2009             |
| Denmark                          | Denmark Health and Morbidity Survey 1987                                                                                                                                                                                                                                                                                                                                            | 1987, 1994, 2000, 2005, 2010 |
| Denmark                          | Survey of Health, Ageing and Retirement in Europe (SHARE)                                                                                                                                                                                                                                                                                                                           | 2004, 2007, 2011             |
| Denmark                          | Nielsen TL, Wraae K, Brixen K, Hermann AP, Andersen M, Hagen C. Prevalence of overweight, obesity and physical inactivity in 20- to 29-year-old, Danish men. Relation to sociodemography, physical dysfunction and low socioeconomic status: the Odense Androgen Study. <i>Int J Obes (Lond).</i> 2006 May;30(5):805-15.                                                            | 2002                         |

| Country Name              | Survey Name                                                                                                                                                                                                                                                                                                                          | Years                        |
|---------------------------|--------------------------------------------------------------------------------------------------------------------------------------------------------------------------------------------------------------------------------------------------------------------------------------------------------------------------------------|------------------------------|
| <b>Denmark</b>            | Rasmussen M, Holstein BE, Due P. Tracking of overweight from mid-adolescence into adulthood: consistent patterns across socio-economic groups. Eur J Public Health. 2012 Dec;22(6):885-7.                                                                                                                                            | 1994, 2002                   |
| <b>Denmark</b>            | Roskam A-JR, Kunst AE. The predictive value of different socio-economic indicators for overweight in nine European countries. Public Health Nutr. 2008 Dec;11(12):1256-66.                                                                                                                                                           | 2000                         |
| <b>Denmark</b>            | Yngve A, De Bourdeaudhuij I, Wolf A, Grjibovski A, Brug J, Due P, Ehrenblad B, Elmadfa I, Franchini B, Klepp K-I, Poortvliet E, Rasmussen M, Thorsdottir I, Perez Rodrigo C. Differences in prevalence of overweight and stunting in 11-year olds across Europe: The Pro Children Study. Eur J Public Health. 2008 Apr;18(2):126-30. | 2003                         |
| <b>Djibouti</b>           | WHO STEPS Global School-Based Health Survey (GSHS)                                                                                                                                                                                                                                                                                   | 2007                         |
| <b>Djibouti</b>           | Multiple Indicator Cluster Survey (MICS)                                                                                                                                                                                                                                                                                             | 2006                         |
| <b>Dominica</b>           | STEPS Noncommunicable Disease Risk Factors Survey                                                                                                                                                                                                                                                                                    | 2007                         |
| <b>Dominican Republic</b> | Multiple Indicator Cluster Survey (MICS)                                                                                                                                                                                                                                                                                             | 2000                         |
| <b>Dominican Republic</b> | International Social Survey Programme (ISSP)                                                                                                                                                                                                                                                                                         | 2007                         |
| <b>Dominican Republic</b> | Demographic and Health Survey (DHS)                                                                                                                                                                                                                                                                                                  | 1986, 1991, 1996, 2002, 2007 |
| <b>Ecuador</b>            | Reproductive Health Survey (RHS)                                                                                                                                                                                                                                                                                                     | 2004                         |
| <b>Egypt</b>              | WHO STEPS Global School-Based Health Survey (GSHS)                                                                                                                                                                                                                                                                                   | 2006                         |

| Country Name             | Survey Name                                                                                                                                                                      | Years                                                                  |
|--------------------------|----------------------------------------------------------------------------------------------------------------------------------------------------------------------------------|------------------------------------------------------------------------|
| <b>Egypt</b>             | Demographic and Health Survey (DHS)                                                                                                                                              | 1988, 1992, 1995, 2000, 2003, 2005, 2008                               |
| <b>Egypt</b>             | WHO Multicountry Survey on Health and Health System Responsiveness                                                                                                               | 2000                                                                   |
| <b>Egypt</b>             | STEPS Noncommunicable Disease Risk Factors Survey                                                                                                                                | 2005, 2011                                                             |
| <b>El Salvador</b>       | Reproductive Health Survey (RHS)                                                                                                                                                 | 1993, 1998, 2002, 2008                                                 |
| <b>Equatorial Guinea</b> | Multiple Indicator Cluster Survey (MICS)                                                                                                                                         | 2000                                                                   |
| <b>Eritrea</b>           | STEPS Noncommunicable Disease Risk Factors Survey                                                                                                                                | 2004                                                                   |
| <b>Eritrea</b>           | Demographic and Health Survey (DHS)                                                                                                                                              | 1995, 2002                                                             |
| <b>Estonia</b>           | Survey of Health, Ageing and Retirement in Europe (SHARE)                                                                                                                        | 2011                                                                   |
| <b>Estonia</b>           | World Health Survey (WHS)                                                                                                                                                        | 2003                                                                   |
| <b>Estonia</b>           | Health Behavior Among the Estonian Adult Population                                                                                                                              | 1990, 1992, 1994, 1996, 1998, 2000, 2002, 2004, 2006, 2008, 2010, 2012 |
| <b>Estonia</b>           | Health Behaviour in School-Aged Children                                                                                                                                         | 2001, 2005, 2009                                                       |
| <b>Estonia</b>           | Eurobarometer                                                                                                                                                                    | 2005                                                                   |
| <b>Estonia</b>           | Kull M, Matsi J, Raudsepp L. Relationship between various physical activity domains and self-perceived health and obesity in women. <i>Women Health</i> . 2010 Oct;50(7):639–51. | 2008                                                                   |



| Country Name                          | Survey Name                                                                                                                                                                                                  | Years                                                                  |
|---------------------------------------|--------------------------------------------------------------------------------------------------------------------------------------------------------------------------------------------------------------|------------------------------------------------------------------------|
| <b>Estonia</b>                        | Pomerleau J, Pudule I, Grinberga D, Kadziauskiene K, Abaravicius A, Bartkeviciute R, Vaask S, Robertson A, McKee M. Patterns of body weight in the Baltic Republics. Public Health Nutr. 2000 Mar;3(1):3–10. | 1997                                                                   |
| <b>Estonia</b>                        | Health Interview Survey                                                                                                                                                                                      | 1996, 2006                                                             |
| <b>Ethiopia</b>                       | Demographic and Health Survey (DHS)                                                                                                                                                                          | 2000, 2005, 2010                                                       |
| <b>Federated States of Micronesia</b> | STEPS Noncommunicable Disease Risk Factors Survey                                                                                                                                                            | 2002, 2006                                                             |
| <b>Fiji</b>                           | STEPS Noncommunicable Disease Risk Factors Survey                                                                                                                                                            | 2002                                                                   |
| <b>Fiji</b>                           | WHO STEPS Global School-Based Health Survey (GSHS)                                                                                                                                                           | 2010                                                                   |
| <b>Finland</b>                        | Children and Young People's Health Follow up Study (LATE)                                                                                                                                                    | 2007                                                                   |
| <b>Finland</b>                        | World Health Survey (WHS)                                                                                                                                                                                    | 2004                                                                   |
| <b>Finland</b>                        | Health Behaviour in School-Aged Children                                                                                                                                                                     | 2001, 2005, 2009                                                       |
| <b>Finland</b>                        | Health Behavior and Health Among the Finnish Adult Population                                                                                                                                                | 1998, 2000, 2001, 2002, 2003, 2004, 2005, 2006, 2007, 2008, 2009, 2010 |
| <b>Finland</b>                        | International Social Survey Programme (ISSP)                                                                                                                                                                 | 2007, 2011                                                             |
| <b>Finland</b>                        | Eurobarometer                                                                                                                                                                                                | 2005                                                                   |
| <b>Finland</b>                        | Finland Health Examination Survey 2000                                                                                                                                                                       | 2000                                                                   |
| <b>Finland</b>                        | Isomaa R, Isomaa A-L, Marttunen M, Kaltiala-Heino R, Björkqvist K. Longitudinal concomitants of incorrect weight perception in female and male adolescents. Body Image. 2011 Jan;8(1):58–63.                 | 2005                                                                   |

| Country Name | Survey Name                                                                                                                                                                                                                                                                    | Years      |
|--------------|--------------------------------------------------------------------------------------------------------------------------------------------------------------------------------------------------------------------------------------------------------------------------------|------------|
| Finland      | Jääskeläinen A, Pussinen J, Nuutinen O, Schwab U, Pirkola J, Kolehmainen M, Järvelin M-R, Laitinen J. Intergenerational transmission of overweight among Finnish adolescents and their parents: a 16-year follow-up study. <i>Int J Obes (Lond)</i> . 2011 Oct;35(10):1289–94. | 1985, 2001 |
| Finland      | Kautiainen S, Koivisto A-M, Koivusilta L, Lintonen T, Virtanen SM, Rimpelä A. Sociodemographic factors and a secular trend of adolescent overweight in Finland. <i>Int J Pediatr Obes</i> . 2009;4(4):360–70.                                                                  | 2005       |
| Finland      | Koskenvuo K, Hublin C, Partinen M, Paunio T, Koskenvuo M. Childhood adversities and quality of sleep in adulthood: A population-based study of 26,000 Finns. <i>Sleep Med</i> . 2010 Jan;11(1):17–22.                                                                          | 2003       |
| Finland      | Laitinen J, Ek E, Sovio U. Stress-related eating and drinking behavior and body mass index and predictors of this behavior. <i>Prev Med</i> . 2002 Jan;34(1):29–39.                                                                                                            | 1997       |
| Finland      | Pirkola J, Tammelin T, Bloigu A, Pouta A, Laitinen J, Ruokonen A, Tapanainen P, Järvelin M-R, Vääräsmäki M. Prevalence of metabolic syndrome at age 16 using the International Diabetes Federation paediatric definition. <i>Arch. Dis. Child</i> . 2008 Nov;93(11):945–51.    | 2001       |

| Country Name | Survey Name                                                                                                                                                                                                                                                                                        | Years |
|--------------|----------------------------------------------------------------------------------------------------------------------------------------------------------------------------------------------------------------------------------------------------------------------------------------------------|-------|
| Finland      | Roskam A-JR, Kunst AE. The predictive value of different socio-economic indicators for overweight in nine European countries. <i>Public Health Nutr.</i> 2008 Dec;11(12):1256–66.                                                                                                                  | 2000  |
| Finland      | Saaristo TE, Barengo NC, Korpi-Hyövälti E, Oksa H, Puolijoki H, Saltevo JT, Vanhala M, Sundvall J, Saarikoski L, Peltonen M, Tuomilehto J. High prevalence of obesity, central obesity and abnormal glucose tolerance in the middle-aged Finnish population. <i>BMC Public Health.</i> 2008;8:423. | 2004  |
| Finland      | Sulander T, Rahkonen O, Nissinen A, Uutela A. Association of smoking status with obesity and diabetes among elderly people. <i>Arch Gerontol Geriatr.</i> 2007 Oct;45(2):159–67.                                                                                                                   | 1985  |
| Finland      | Tikkinen KAO, Auvinen A, Johnson TM 2nd, Weiss JP, Keränen T, Tiitinen A, Polo O, Partinen M, Tammela TLJ. A systematic evaluation of factors associated with nocturia--the population-based FINNO study. <i>Am. J. Epidemiol.</i> 2009 Aug 1;170(3):361–8.                                        | 2003  |
| Finland      | Veltsista A, Laitinen J, Sovio U, Roma E, Järvelin M-R, Bakoula C. Relationship between eating behavior, breakfast consumption, and obesity among Finnish and Greek adolescents. <i>J Nutr Educ Behav.</i> 2010 Dec;42(6):417–21.                                                                  | 2001  |
| France       | The health of children aged 6 through school health assessments                                                                                                                                                                                                                                    | 1999  |

| Country Name | Survey Name                                                                                                                                                                                                                          | Years                        |
|--------------|--------------------------------------------------------------------------------------------------------------------------------------------------------------------------------------------------------------------------------------|------------------------------|
| France       | Survey of Health and Welfare                                                                                                                                                                                                         | 2002, 2004, 2006, 2008, 2010 |
| France       | International Social Survey Programme (ISSP)                                                                                                                                                                                         | 2007, 2011                   |
| France       | Survey of Health, Ageing and Retirement in Europe (SHARE)                                                                                                                                                                            | 2004, 2007, 2011             |
| France       | Health Behaviour in School-Aged Children                                                                                                                                                                                             | 2001, 2005, 2009             |
| France       | Eurobarometer                                                                                                                                                                                                                        | 1989, 2005                   |
| France       | The health of school children CM2                                                                                                                                                                                                    | 2004, 2007                   |
| France       | France Nutrition and Health Survey 2006-2007                                                                                                                                                                                         | 2006                         |
| France       | The health of children of kindergarten in 2005-2006                                                                                                                                                                                  | 2005                         |
| France       | France National Survey of Obesity and Overweight                                                                                                                                                                                     | 2003, 2006, 2009, 2012       |
| France       | World Health Survey (WHS)                                                                                                                                                                                                            | 2003                         |
| France       | Adolescent health school in third grade in 2003-2004                                                                                                                                                                                 | 2003                         |
| France       | Berraho M, Nejari C, Raheison C, El Achhab Y, Tachfouti N, Serhier Z, Dartigues JF, Barberger-Gateau P. Body mass index, disability, and 13-year mortality in older French adults. J Aging Health. 2010 Feb;22(1):68–83.             | 1988                         |
| France       | Heude B, Lafay L, Borys JM, Thibult N, Lommez A, Romon M, Ducimetière P, Charles MA. Time trend in height, weight, and obesity prevalence in school children from Northern France, 1992-2000. Diabetes Metab. 2003 Jun;29(3):235–40. | 1992, 2000                   |

| Country Name | Survey Name                                                                                                                                                                                                                                                                    | Years |
|--------------|--------------------------------------------------------------------------------------------------------------------------------------------------------------------------------------------------------------------------------------------------------------------------------|-------|
| France       | Klein-Platat C, Wagner A, Haan MC, Arveiler D, Schlienger JL, Simon C. Prevalence and sociodemographic determinants of overweight in young French adolescents. <i>Diabetes Metab. Res. Rev.</i> 2003 Apr;19(2):153–8.                                                          | 2001  |
| France       | Lioret S, Maire B, Volatier J-L, Charles M-A. Child overweight in France and its relationship with physical activity, sedentary behaviour and socioeconomic status. <i>Eur J Clin Nutr.</i> 2007 Apr;61(4):509–16.                                                             | 1998  |
| France       | Léger D, Roscoat E du, Bayon V, Guignard R, Pâquereau J, Beck F. Short sleep in young adults: Insomnia or sleep debt? Prevalence and clinical description of short sleep in a representative sample of 1004 young adults from France. <i>Sleep Med.</i> 2011 May;12(5):454–62. | 2008  |
| France       | Ottova V, Erhart M, Rajmil L, Dettenborn-Betz L, Ravens-Sieberer U. Overweight and its impact on the health-related quality of life in children and adolescents: results from the European KIDSCREEN survey. <i>Qual Life Res.</i> 2012 Feb;21(1):59–69.                       | 2003  |
| France       | Pigeyre M, Duhamel A, Poulain J-P, Rousseaux J, Barbe P, Jeanneau S, Tibère L, Romon M. Influence of social factors on weight-related behaviors according to gender in the French adult population. <i>Appetite.</i> 2012 Apr;58(2):703–9.                                     | 2003  |

| Country Name | Survey Name                                                                                                                                                                                                                                                              | Years      |
|--------------|--------------------------------------------------------------------------------------------------------------------------------------------------------------------------------------------------------------------------------------------------------------------------|------------|
| France       | Péneau S, Rouchaud A, Rolland-Cachera M-F, Arnault N, Hercberg S, Castetbon K. Body size and growth from birth to 2 years and risk of overweight at 7-9 years. <i>Int J Pediatr Obes.</i> 2011 Jun;6(2-2):e162-169.                                                      | 2000       |
| France       | Péneau S, Salanave B, Rolland-Cachera M-F, Hercberg S, Castetbon K. Correlates of sedentary behavior in 7 to 9-year-old French children are dependent on maternal weight status. <i>Int J Obes (Lond).</i> 2011 Jul;35(7):907-15.                                        | 2007       |
| France       | Rolland-Cachera M-F, Castetbon K, Arnault N, Bellisle F, Romano M-C, Lehingue Y, Frelut M-L, Hercberg S. Body mass index in 7-9-y-old French children: frequency of obesity, overweight and thinness. <i>Int. J. Obes. Relat. Metab. Disord.</i> 2002 Dec;26(12):1610-6. | 2000       |
| France       | Salanave B, Peneau S, Rolland-Cachera M-F, Hercberg S, Castetbon K. Stabilization of overweight prevalence in French children between 2000 and 2007. <i>Int J Pediatr Obes.</i> 2009;4(2):66-72.                                                                         | 2007       |
| France       | Thibault H, Carriere C, Langevin C, Kossi Déti E, Barberger-Gateau P, Maurice S. Prevalence and factors associated with overweight and obesity in French primary-school children. <i>Public Health Nutr.</i> 2013 Feb;16(2):193-201.                                     | 2007       |
| Gabon        | STEPS Noncommunicable Disease Risk Factors Survey                                                                                                                                                                                                                        | 2009       |
| Gabon        | Demographic and Health Survey (DHS)                                                                                                                                                                                                                                      | 2000, 2012 |

| Country Name | Survey Name                                                                                                                                                                                                                   | Years            |
|--------------|-------------------------------------------------------------------------------------------------------------------------------------------------------------------------------------------------------------------------------|------------------|
| Georgia      | STEPS Noncommunicable Disease Risk Factors Survey                                                                                                                                                                             | 2010             |
| Georgia      | Multiple Indicator Cluster Survey (MICS)                                                                                                                                                                                      | 2005             |
| Georgia      | WHO Multicountry Survey on Health and Health System Responsiveness                                                                                                                                                            | 2000             |
| Germany      | Health Behaviour in School-Aged Children                                                                                                                                                                                      | 2001, 2005, 2009 |
| Germany      | Germany National Nutrition Survey II 2005-2007                                                                                                                                                                                | 2005             |
| Germany      | German Health Interview and Examination Survey for Adults (DEGS1)                                                                                                                                                             | 2008             |
| Germany      | Eurobarometer                                                                                                                                                                                                                 | 1989, 2005       |
| Germany      | International Social Survey Programme (ISSP)                                                                                                                                                                                  | 2007, 2012       |
| Germany      | Germany National Health Interview and Examination Survey                                                                                                                                                                      | 1998             |
| Germany      | Germany Telephone Health Survey on Chronic Diseases and their Conditions 2003                                                                                                                                                 | 2003             |
| Germany      | Survey of Health, Ageing and Retirement in Europe (SHARE)                                                                                                                                                                     | 2004, 2007, 2011 |
| Germany      | Apfelbacher CJ, Loerbroks A, Cairns J, Behrendt H, Ring J, Krämer U. Predictors of overweight and obesity in five to seven-year-old children in Germany: results from cross-sectional studies. BMC Public Health. 2008;8:171. | 1991             |
| Germany      | Bayer O, Rosario AS, Wabitsch M, von Kries R. Sleep duration and obesity in children: is the association dependent on age and choice of the outcome parameter? Sleep. 2009 Sep;32(9):1183-9.                                  | 2003             |

| Country Name | Survey Name                                                                                                                                                                                                                                   | Years                  |
|--------------|-----------------------------------------------------------------------------------------------------------------------------------------------------------------------------------------------------------------------------------------------|------------------------|
| Germany      | Boneberger A, von Kries R, Milde-Busch A, Bolte G, Rochat MK, Rückinger S, GME Study Group. Association between peer relationship problems and childhood overweight/obesity. <i>Acta Paediatr.</i> 2009 Dec;98(12):1950–5.                    | 2005                   |
| Germany      | Buchwald S, Kocher T, Biffar R, Harb A, Holtfreter B, Meisel P. Tooth loss and periodontitis by socio-economic status and inflammation in a longitudinal population-based study. <i>J. Clin. Periodontol.</i> 2013 Mar;40(3):203–11.          | 2002                   |
| Germany      | De Zwaan M, Gruss B, Müller A, Philipsen A, Graap H, Martin A, Glaesmer H, Hilbert A. Association between obesity and adult attention-deficit/hyperactivity disorder in a German community-based sample. <i>Obes Facts.</i> 2011;4(3):204–11. | 2009                   |
| Germany      | Frye C, Heinrich J. Trends and predictors of overweight and obesity in East German children. <i>Int. J. Obes. Relat. Metab. Disord.</i> 2003 Aug;27(8):963–9.                                                                                 | 1992, 1995, 1998       |
| Germany      | Kalies H, Lenz J, von Kries R. Prevalence of overweight and obesity and trends in body mass index in German pre-school children, 1982-1997. <i>Int. J. Obes. Relat. Metab. Disord.</i> 2002 Sep;26(9):1211–7.                                 | 1982, 1987, 1992, 1997 |
| Germany      | Kuntz B, Lampert T. Socioeconomic factors and obesity. <i>Dtsch Arztebl Int.</i> 2010 Jul;107(30):517–22.                                                                                                                                     | 2002                   |



| Country Name | Survey Name                                                                                                                                                                                                                                                                                                  | Years                        |
|--------------|--------------------------------------------------------------------------------------------------------------------------------------------------------------------------------------------------------------------------------------------------------------------------------------------------------------|------------------------------|
| Germany      | Lampert T. Smoking, physical inactivity, and obesity: associations with social status. Dtsch Arztebl Int. 2010 Jan;107(1-2):1-7.                                                                                                                                                                             | 2002                         |
| Germany      | Liese AD, Hirsch T, von Mutius E, Weiland SK. Burden of overweight in Germany: prevalence differences between former East and West German children. Eur J Public Health. 2006 Oct;16(5):526-31.                                                                                                              | 1995                         |
| Germany      | Mond JM, Stich H, Hay PJ, Kraemer A, Baune BT. Associations between obesity and developmental functioning in pre-school children: a population-based study. Int J Obes (Lond). 2007 Jul;31(7):1068-73.                                                                                                       | 1997                         |
| Germany      | Nagel G, Wabitsch M, Galm C, Berg S, Brandstetter S, Fritz M, Klenk J, Peter R, Prokopchuk D, Steiner R, Stroth S, Wartha O, Weiland SK, Steinacker J. Determinants of obesity in the Ulm Research on Metabolism, Exercise and Lifestyle in Children (URMEL-ICE). Eur. J. Pediatr. 2009 Oct;168(10):1259-67. | 2006                         |
| Germany      | Ottova V, Erhart M, Rajmil L, Dettenborn-Betz L, Ravens-Sieberer U. Overweight and its impact on the health-related quality of life in children and adolescents: results from the European KIDSCREEN survey. Qual Life Res. 2012 Feb;21(1):59-69.                                                            | 2003                         |
| Ghana        | Demographic and Health Survey (DHS)                                                                                                                                                                                                                                                                          | 1988, 1993, 1998, 2003, 2008 |

| Country Name | Survey Name                                                                                                                                                                                                                                                                                                                       | Years            |
|--------------|-----------------------------------------------------------------------------------------------------------------------------------------------------------------------------------------------------------------------------------------------------------------------------------------------------------------------------------|------------------|
| Ghana        | WHO Study on Global Ageing and Adult Health (SAGE)                                                                                                                                                                                                                                                                                | 2007             |
| Ghana        | WHO STEPS Global School-Based Health Survey (GSHS)                                                                                                                                                                                                                                                                                | 2007             |
| Ghana        | Multiple Indicator Cluster Survey (MICS)                                                                                                                                                                                                                                                                                          | 2006, 2011       |
| Greece       | Eurobarometer                                                                                                                                                                                                                                                                                                                     | 1989, 2005       |
| Greece       | Health Behaviour in School-Aged Children                                                                                                                                                                                                                                                                                          | 2001, 2005, 2009 |
| Greece       | Survey of Health, Ageing and Retirement in Europe (SHARE)                                                                                                                                                                                                                                                                         | 2004, 2007       |
| Greece       | Androustos O, Grammatikaki E, Moschonis G, Roma-Giannikou E, Chrousos GP, Manios Y, Kanaka-Gantenbein C. Neck circumference: a useful screening tool of cardiovascular risk in children. <i>Pediatr Obes.</i> 2012 Jun;7(3):187–95.                                                                                               | 2007             |
| Greece       | Brug J, van Stralen MM, Te Velde SJ, Chinapaw MJM, De Bourdeaudhuij I, Lien N, Bere E, Maskini V, Singh AS, Maes L, Moreno L, Jan N, Kovacs E, Lobstein T, Manios Y. Differences in weight status and energy-balance related behaviors among schoolchildren across Europe: the ENERGY-project. <i>PLoS ONE.</i> 2012;7(4):e34742. | 2010             |
| Greece       | Georgiadis G, Nassis GP. Prevalence of overweight and obesity in a national representative sample of Greek children and adolescents. <i>Eur J Clin Nutr.</i> 2007 Sep;61(9):1072–4.                                                                                                                                               | 1990             |

| Country Name | Survey Name                                                                                                                                                                                                                                       | Years      |
|--------------|---------------------------------------------------------------------------------------------------------------------------------------------------------------------------------------------------------------------------------------------------|------------|
| Greece       | Giannouli P, Zervas I, Armeni E, Koundi K, Spyropoulou A, Alexandrou A, Kazani A, Areti A, Creatsa M, Lambrinouadaki I. Determinants of quality of life in Greek middle-age women: a population survey. <i>Maturitas</i> . 2012 Feb;71(2):154–61. | 2007       |
| Greece       | Karayiannis D, Yannakoulia M, Terzidou M, Sidossis LS, Kokkevi A. Prevalence of overweight and obesity in Greek school-aged children and adolescents. <i>Eur J Clin Nutr</i> . 2003 Sep;57(9):1189–92.                                            | 1997       |
| Greece       | Kontogianni MD, Farmaki A-E, Vidra N, Sofrona S, Magkanari F, Yannakoulia M. Associations between lifestyle patterns and body mass index in a sample of Greek children and adolescents. <i>J Am Diet Assoc</i> . 2010 Feb;110(2):215–21.          | 2007       |
| Greece       | Magkos F, Manios Y, Christakis G, Kafatos AG. Secular trends in cardiovascular risk factors among school-aged boys from Crete, Greece, 1982-2002. <i>Eur J Clin Nutr</i> . 2005 Jan;59(1):1–7.                                                    | 1982, 2002 |
| Greece       | Manios Y, Costarelli V, Kolotourou M, Kondakis K, Tzavara C, Moschonis G. Prevalence of obesity in preschool Greek children, in relation to parental characteristics and region of residence. <i>BMC Public Health</i> . 2007;7:178.              | 2003       |

| Country Name | Survey Name                                                                                                                                                                                                                                  | Years      |
|--------------|----------------------------------------------------------------------------------------------------------------------------------------------------------------------------------------------------------------------------------------------|------------|
| Greece       | Manios Y, Yiannakouris N, Papoutsakis C, Moschonis G, Magkos F, Skenderi K, Zampelas A. Behavioral and physiological indices related to BMI in a cohort of primary schoolchildren in Greece. <i>Am. J. Hum. Biol.</i> 2004 Dec;16(6):639–47. | 2001       |
| Greece       | Papadimitriou A, Kounadi D, Konstantinidou M, Xepapadaki P, Nicolaidou P. Prevalence of obesity in elementary schoolchildren living in Northeast Attica, Greece. <i>Obesity (Silver Spring)</i> . 2006 Jul;14(7):1113–7.                     | 2005       |
| Greece       | Roskam A-JR, Kunst AE. The predictive value of different socio-economic indicators for overweight in nine European countries. <i>Public Health Nutr.</i> 2008 Dec;11(12):1256–66.                                                            | 2000       |
| Greece       | Savva SC, Kourides Y, Tornaritis M, Epiphaniou-Savva M, Chadjigeorgiou C, Kafatos A. Obesity in children and adolescents in Cyprus. Prevalence and predisposing factors. <i>Int. J. Obes. Relat. Metab. Disord.</i> 2002 Aug;26(8):1036–45.  | 1999       |
| Greece       | Smpokos EA, Linardakis M, Papadaki A, Kafatos A. Secular changes in anthropometric measurements and blood pressure in children of Crete, Greece, during 1992/93 and 2006/07. <i>Prev Med.</i> 2011 Apr;52(3-4):213–7.                        | 1992, 2006 |

| Country Name | Survey Name                                                                                                                                                                                                                                                                      | Years                |
|--------------|----------------------------------------------------------------------------------------------------------------------------------------------------------------------------------------------------------------------------------------------------------------------------------|----------------------|
| Greece       | Tambalis KD, Panagiotakos DB, Psarra G, Sidossis LS. Inverse but independent trends in obesity and fitness levels among Greek children: a time-series analysis from 1997 to 2007. <i>Obes Facts</i> . 2011;4(2):165–74.                                                          | 1997-2001, 2003-2007 |
| Greece       | Tokmakidis SP, Kasambalis A, Christodoulos AD. Fitness levels of Greek primary schoolchildren in relationship to overweight and obesity. <i>Eur. J. Pediatr</i> . 2006 Dec;165(12):867–74.                                                                                       | 2003                 |
| Greece       | Tzotzas T, Kapantais E, Tziomalos K, Ioannidis I, Mortoglou A, Bakatselos S, Kaklamanou M, Lanaras L, Kaklamanos I. Epidemiological survey for the prevalence of overweight and abdominal obesity in Greek adolescents. <i>Obesity (Silver Spring)</i> . 2008 Jul;16(7):1718–22. | 2003                 |
| Greece       | Veltsista A, Laitinen J, Sovio U, Roma E, Järvelin M-R, Bakoula C. Relationship between eating behavior, breakfast consumption, and obesity among Finnish and Greek adolescents. <i>J Nutr Educ Behav</i> . 2010 Dec;42(6):417–21.                                               | 2001                 |
| Greece       | Yannakoulia M, Panagiotakos D, Pitsavos C, Lentzas Y, Chrysohoou C, Skoumas I, Stefanadis C. Five-year incidence of obesity and its determinants: the ATTICA study. <i>Public Health Nutr</i> . 2009 Jan;12(1):36–43.                                                            | 2006                 |

| Country Name  | Survey Name                                                                                                                                                                                       | Years                  |
|---------------|---------------------------------------------------------------------------------------------------------------------------------------------------------------------------------------------------|------------------------|
| Greece        | Yannakoulia M, Panagiotakos DB, Pitsavos C, Stefanadis C. Correlates of BMI misreporting among apparently healthy individuals: the ATTICA study. Obesity (Silver Spring). 2006 May;14(5):894-901. | 2001                   |
| Guatemala     | World Bank - Living Standards and Measurement Survey (LSMS)                                                                                                                                       | 2000                   |
| Guatemala     | Demographic and Health Survey (DHS)                                                                                                                                                               | 1987, 1995, 1998       |
| Guatemala     | Reproductive Health Survey (RHS)                                                                                                                                                                  | 2002, 2008             |
| Guinea        | Demographic and Health Survey (DHS)                                                                                                                                                               | 1999, 2005             |
| Guinea        | STEPS Noncommunicable Disease Risk Factors Survey                                                                                                                                                 | 2009                   |
| Guinea-Bissau | Multiple Indicator Cluster Survey (MICS)                                                                                                                                                          | 2000, 2006             |
| Guyana        | Multiple Indicator Cluster Survey (MICS)                                                                                                                                                          | 2000, 2006             |
| Guyana        | World Bank - Living Standards and Measurement Survey (LSMS)                                                                                                                                       | 1992                   |
| Guyana        | WHO STEPS Global School-Based Health Survey (GSHS)                                                                                                                                                | 2004                   |
| Guyana        | Demographic and Health Survey (DHS)                                                                                                                                                               | 2009                   |
| Haiti         | Demographic and Health Survey (DHS)                                                                                                                                                               | 1994, 2000, 2005, 2012 |
| Haiti         | Haiti Living Condition Survey 2001                                                                                                                                                                | 2001                   |
| Honduras      | Demographic and Health Survey (DHS)                                                                                                                                                               | 2005, 2011             |
| Honduras      | Reproductive Health Survey (RHS)                                                                                                                                                                  | 2001                   |
| Hungary       | World Health Survey (WHS)                                                                                                                                                                         | 2003                   |
| Hungary       | Hungary National Population Health Survey 2003                                                                                                                                                    | 2003                   |
| Hungary       | Health Behaviour in School-Aged Children                                                                                                                                                          | 2001, 2005, 2009       |
| Hungary       | Eurobarometer                                                                                                                                                                                     | 2005                   |

| Country Name | Survey Name                                                                                                                                                                                                                                                                                                                | Years                              |
|--------------|----------------------------------------------------------------------------------------------------------------------------------------------------------------------------------------------------------------------------------------------------------------------------------------------------------------------------|------------------------------------|
| Hungary      | Survey of Health, Ageing and Retirement in Europe (SHARE)                                                                                                                                                                                                                                                                  | 2011                               |
| Hungary      | Brug J, van Stralen MM, Te Velde SJ, Chinapaw MJM, De Bourdeaudhuij I, Lien N, Bere E, Maskini V, Singh AS, Maes L, Moreno L, Jan N, Kovacs E, Lobstein T, Manios Y. Differences in weight status and energy-balance related behaviors among schoolchildren across Europe: the ENERGY-project. PLoS ONE. 2012;7(4):e34742. | 2010                               |
| Hungary      | Ottova V, Erhart M, Rajmil L, Dettenborn-Betz L, Ravens-Sieberer U. Overweight and its impact on the health-related quality of life in children and adolescents: results from the European KIDSCREEN survey. Qual Life Res. 2012 Feb;21(1):59–69.                                                                          | 2003                               |
| Iceland      | Health and Well-Being of the Icelandic Population                                                                                                                                                                                                                                                                          | 2007                               |
| Iceland      | Iceland Dietary Survey 2002                                                                                                                                                                                                                                                                                                | 2002                               |
| Iceland      | Health Behaviour in School-Aged Children                                                                                                                                                                                                                                                                                   | 2005, 2009                         |
| Iceland      | National Nutrition Survey 2010-2011                                                                                                                                                                                                                                                                                        | 2010                               |
| Iceland      | Eiösdóttir SP, Kristjánsson AL, Sigfúsdóttir ID, Garber CE, Allegrante JP. Trends in body mass index among Icelandic adolescents and young adults from 1992 to 2007. Int J Environ Res Public Health. 2010 May;7(5):2191–207.                                                                                              | 1992, 1997, 2000, 2004, 2006, 2007 |

| Country Name | Survey Name                                                                                                                                                                                                                                                                                                                          | Years            |
|--------------|--------------------------------------------------------------------------------------------------------------------------------------------------------------------------------------------------------------------------------------------------------------------------------------------------------------------------------------|------------------|
| Iceland      | Matthiasdottir E, Jonsson SH, Kristjansson AL. Body weight dissatisfaction in the Icelandic adult population: a normative discontent? Eur J Public Health. 2012 Feb;22(1):116–21.                                                                                                                                                    | 2007             |
| Iceland      | Olafsdottir LB, Gudjonsson H, Jonsdottir HH, Thjodleifsson B. Natural history of heartburn: a 10-year population-based study. World J. Gastroenterol. 2011 Feb 7;17(5):639–45.                                                                                                                                                       | 2006             |
| Iceland      | Yngve A, De Bourdeaudhuij I, Wolf A, Grjibovski A, Brug J, Due P, Ehrenblad B, Elmadfa I, Franchini B, Klepp K-I, Poortvliet E, Rasmussen M, Thorsdottir I, Perez Rodrigo C. Differences in prevalence of overweight and stunting in 11-year olds across Europe: The Pro Children Study. Eur J Public Health. 2008 Apr;18(2):126–30. | 2003             |
| India        | India Human Development Survey                                                                                                                                                                                                                                                                                                       | 2004             |
| India        | WHO STEPS Global School-Based Health Survey (GSHS)                                                                                                                                                                                                                                                                                   | 2007             |
| India        | WHO Multicountry Survey on Health and Health System Responsiveness                                                                                                                                                                                                                                                                   | 2000             |
| India        | Demographic and Health Survey (DHS)                                                                                                                                                                                                                                                                                                  | 1992, 1998, 2005 |
| India        | WHO Study on Global Ageing and Adult Health (SAGE)                                                                                                                                                                                                                                                                                   | 2007             |



| Country Name | Survey Name                                                                                                                                                                                                                                                                                                                    | Years |
|--------------|--------------------------------------------------------------------------------------------------------------------------------------------------------------------------------------------------------------------------------------------------------------------------------------------------------------------------------|-------|
| India        | Daniel CR, Prabhakaran D, Kapur K, Graubard BI, Devasenapathy N, Ramakrishnan L, George PS, Shetty H, Ferrucci LM, Yurgalevitch S, Chatterjee N, Reddy KS, Rastogi T, Gupta PC, Mathew A, Sinha R. A cross-sectional investigation of regional patterns of diet and cardio-metabolic risk in India. <i>Nutr J.</i> 2011;10:12. | 2006  |
| India        | Deepa M, Farooq S, Deepa R, Manjula D, Mohan V. Prevalence and significance of generalized and central body obesity in an urban Asian Indian population in Chennai, India (CURES: 47). <i>Eur J Clin Nutr.</i> 2009 Feb;63(2):259–67.                                                                                          | 2001  |
| India        | Gupta R, Deedwania PC, Gupta A, Rastogi S, Panwar RB, Kothari K. Prevalence of metabolic syndrome in an Indian urban population. <i>Int. J. Cardiol.</i> 2004 Nov;97(2):257–61.                                                                                                                                                | 2001  |
| India        | Kaur S, Sachdev HPS, Dwivedi SN, Lakshmy R, Kapil U. Prevalence of overweight and obesity amongst school children in Delhi, India. <i>Asia Pac J Clin Nutr.</i> 2008;17(4):592–6.                                                                                                                                              | 2005  |
| India        | Sachdev HPS, Osmond C, Fall CHD, Lakshmy R, Ramji S, Dey Biswas SK, Prabhakaran D, Tandon N, Reddy KS, Barker DJP, Bhargava SK. Predicting adult metabolic syndrome from childhood body mass index: follow-up of the New Delhi birth cohort. <i>Arch. Dis. Child.</i> 2009 Oct;94(10):768–74.                                  | 1983  |

| Country Name     | Survey Name                                                                                                                                                                                                                                             | Years                  |
|------------------|---------------------------------------------------------------------------------------------------------------------------------------------------------------------------------------------------------------------------------------------------------|------------------------|
| <b>India</b>     | Subramanian SV, Smith GD. Patterns, distribution, and determinants of under- and overnutrition: a population-based study of women in India. <i>Am. J. Clin. Nutr.</i> 2006 Sep;84(3):633–40.                                                            | 1998                   |
| <b>Indonesia</b> | National Basic Health Research (Riskesdas)                                                                                                                                                                                                              | 2007, 2010             |
| <b>Indonesia</b> | STEPS Noncommunicable Disease Risk Factors Survey                                                                                                                                                                                                       | 2001, 2003, 2006       |
| <b>Indonesia</b> | WHO Multicountry Survey on Health and Health System Responsiveness                                                                                                                                                                                      | 2000                   |
| <b>Indonesia</b> | Indonesia Family Life Survey                                                                                                                                                                                                                            | 1993, 1997, 2000, 2007 |
| <b>Indonesia</b> | Krishnan A, Ekowati R, Baridalayne N, Kusumawardani N, Suhardi, Kapoor SK, Leowski J. Evaluation of community-based interventions for non-communicable diseases: experiences from India and Indonesia. <i>Health Promot Int.</i> 2011 Sep;26(3):276–89. | 2003                   |
| <b>Iran</b>      | WHO Multicountry Survey on Health and Health System Responsiveness                                                                                                                                                                                      | 2000                   |
| <b>Iran</b>      | STEPS Noncommunicable Disease Risk Factors Survey                                                                                                                                                                                                       | 2005, 2006, 2007, 2009 |

| Country Name | Survey Name                                                                                                                                                                                                                                                                                                                                        | Years |
|--------------|----------------------------------------------------------------------------------------------------------------------------------------------------------------------------------------------------------------------------------------------------------------------------------------------------------------------------------------------------|-------|
| Iran         | Esteghamati A, Meysamie A, Khalilzadeh O, Rashidi A, Haghazali M, Asgari F, Kamgar M, Gouya MM, Abbasi M. Third national Surveillance of Risk Factors of Non-Communicable Diseases (SuRFNCD-2007) in Iran: methods and results on prevalence of diabetes, hypertension, obesity, central obesity, and dyslipidemia. BMC Public Health. 2009;9:167. | 2007  |
| Iran         | Janghorbani M, Amini M, Rezvanian H, Gouya M-M, Delavari A, Alikhani S, Mahdavi A. Association of body mass index and abdominal obesity with marital status in adults. Arch Iran Med. 2008 May;11(3):274–81.                                                                                                                                       | 2004  |
| Iran         | Kelishadi R, Ardalan G, Gheiratmand R, Majdzadeh R, Hosseini M, Gouya MM, Razaghi EM, Delavari A, Motaghian M, Barekati H, Mahmoud-Arabi MS, Lock K, Caspian Study Group. Thinness, overweight and obesity in a national sample of Iranian children and adolescents: CASPIAN Study. Child Care Health Dev. 2008 Jan;34(1):44–54.                   | 2003  |
| Iran         | Nabipour I, Amiri M, Imami SR, Jahfari SM, Nosrati A, Iranpour D, Soltanian AR. Unhealthy lifestyles and ischaemic electrocardiographic abnormalities: the Persian Gulf Healthy Heart Study. East. Mediterr. Health J. 2008 Aug;14(4):858–68.                                                                                                      | 2003  |

| Country Name   | Survey Name                                                                                                                                                                                                                                   | Years            |
|----------------|-----------------------------------------------------------------------------------------------------------------------------------------------------------------------------------------------------------------------------------------------|------------------|
| <b>Iran</b>    | Rashidy-Pour A, Malek M, Eskandarian R, Ghorbani R. Obesity in the Iranian population. <i>Obes Rev.</i> 2009 Jan;10(1):2–6.                                                                                                                   | 2005             |
| <b>Iraq</b>    | STEPS Noncommunicable Disease Risk Factors Survey                                                                                                                                                                                             | 2006             |
| <b>Iraq</b>    | Multiple Indicator Cluster Survey (MICS)                                                                                                                                                                                                      | 2000, 2006, 2011 |
| <b>Ireland</b> | Irish National Nutrition Survey                                                                                                                                                                                                               | 1990             |
| <b>Ireland</b> | Ireland Survey of Lifestyle Attitudes and Nutrition                                                                                                                                                                                           | 1998, 2002, 2007 |
| <b>Ireland</b> | Eurobarometer                                                                                                                                                                                                                                 | 1989, 2005       |
| <b>Ireland</b> | North/South Ireland Food Consumption Survey                                                                                                                                                                                                   | 2001             |
| <b>Ireland</b> | Health Behaviour in School-Aged Children                                                                                                                                                                                                      | 2001, 2005, 2009 |
| <b>Ireland</b> | National Adult Nutrition Survey                                                                                                                                                                                                               | 2011             |
| <b>Ireland</b> | World Health Survey (WHS)                                                                                                                                                                                                                     | 2003             |
| <b>Ireland</b> | International Social Survey Programme (ISSP)                                                                                                                                                                                                  | 2007             |
| <b>Ireland</b> | Evans DS, Glacken M, Goggin D. Childhood obesity: the extent of the problem among 6-year-old Irish national school children. <i>Child Care Health Dev.</i> 2011 May;37(3):352–9.                                                              | 2004-2007        |
| <b>Ireland</b> | Lutomski JE, van den Broeck J, Harrington J, Shiely F, Perry JJ. Sociodemographic, lifestyle, mental health and dietary factors associated with direction of misreporting of energy intake. <i>Public Health Nutr.</i> 2011 Mar;14(3):532–41. | 2007             |
| <b>Ireland</b> | McCrary C, Layte R. Breastfeeding and risk of overweight and obesity at nine-years of age. <i>Soc Sci Med.</i> 2012 Jul;75(2):323–30.                                                                                                         | 2007             |

| Country Name | Survey Name                                                                                                                                                                                                                                                                                                                                                                  | Years      |
|--------------|------------------------------------------------------------------------------------------------------------------------------------------------------------------------------------------------------------------------------------------------------------------------------------------------------------------------------------------------------------------------------|------------|
| Ireland      | Roskam A-JR, Kunst AE. The predictive value of different socio-economic indicators for overweight in nine European countries. Public Health Nutr. 2008 Dec;11(12):1256–66.                                                                                                                                                                                                   | 2000       |
| Ireland      | Shelley E, Daly L, Kilcoyne D, Graham I. Obesity: a public health problem in Ireland? Ir J Med Sci. 1991 Jan;160 Suppl 9:29–34.                                                                                                                                                                                                                                              | 1985       |
| Ireland      | Whelton H, Harrington J, Crowley E, Kelleher V, Cronin M, Perry JJ. Prevalence of overweight and obesity on the island of Ireland: results from the North South Survey of Children's Height, Weight and Body Mass Index, 2002. BMC Public Health. 2007;7:187.                                                                                                                | 2002       |
| Ireland      | Wijnhoven TMA, van Raaij JMA, Spinelli A, Rito AI, Hovengen R, Kunesova M, Starc G, Rutter H, Sjöberg A, Petrauskiene A, O'Dwyer U, Petrova S, Farrugia Sant'angelo V, Wauters M, Yngve A, Rubana I-M, Breda J. WHO European Childhood Obesity Surveillance Initiative 2008: weight, height and body mass index in 6-9-year-old children. Pediatr Obes. 2013 Apr;8(2):79–97. | 2007       |
| Israel       | World Health Survey (WHS)                                                                                                                                                                                                                                                                                                                                                    | 2003       |
| Israel       | Survey of Health, Ageing and Retirement in Europe (SHARE)                                                                                                                                                                                                                                                                                                                    | 2004       |
| Israel       | MABAT: First Israeli National Health and Nutrition Survey 1999-2001                                                                                                                                                                                                                                                                                                          | 1999       |
| Israel       | Israel National Health and Nutrition Survey of the Elderly                                                                                                                                                                                                                                                                                                                   | 2005       |
| Israel       | International Social Survey Programme (ISSP)                                                                                                                                                                                                                                                                                                                                 | 2007, 2012 |

| Country Name | Survey Name                                                                                                                                                                                                                                                                                                                                                           | Years                                                      |
|--------------|-----------------------------------------------------------------------------------------------------------------------------------------------------------------------------------------------------------------------------------------------------------------------------------------------------------------------------------------------------------------------|------------------------------------------------------------|
| Israel       | Israel National Health and Nutrition Survey 2003                                                                                                                                                                                                                                                                                                                      | 2003                                                       |
| Israel       | Israel Health Interview Survey                                                                                                                                                                                                                                                                                                                                        | 2003                                                       |
| Israel       | Health Behaviour in School-Aged Children                                                                                                                                                                                                                                                                                                                              | 2001, 2005                                                 |
| Italy        | Osservatorio epidemiologico cardiovascolare                                                                                                                                                                                                                                                                                                                           | 1998                                                       |
| Italy        | Eurobarometer                                                                                                                                                                                                                                                                                                                                                         | 1989, 2005                                                 |
| Italy        | Health Behaviour in School-Aged Children                                                                                                                                                                                                                                                                                                                              | 2001, 2005, 2009                                           |
| Italy        | Italy Lifestyle and Health                                                                                                                                                                                                                                                                                                                                            | 2002, 2003, 2005, 2006, 2007, 2008, 2009, 2010, 2011, 2012 |
| Italy        | Survey of Health, Ageing and Retirement in Europe (SHARE)                                                                                                                                                                                                                                                                                                             | 2004, 2007, 2011                                           |
| Italy        | Italy Health Conditions, Risk Factors and Use of Health Services 2005                                                                                                                                                                                                                                                                                                 | 2005                                                       |
| Italy        | Health Conditions and Use of Health Services Survey                                                                                                                                                                                                                                                                                                                   | 1999                                                       |
| Italy        | Albertini A, Tripodi A, Fabbri A, Mattioli M, Cavrini G, Cecchetti R, Dalle Donne E, Cortesi C, De Giorgi S, Contarini V, Andreotti L, Veronesi B, Stefanelli I, Di Martino E. Prevalence of obesity in 6- and 9-year-old children living in Central-North Italy. Analysis of determinants and indicators of risk of overweight. <i>Obes Rev.</i> 2008 Jan;9(1):4–10. | 2003, 2005                                                 |

| Country Name | Survey Name                                                                                                                                                                                                                                                                                                                             | Years |
|--------------|-----------------------------------------------------------------------------------------------------------------------------------------------------------------------------------------------------------------------------------------------------------------------------------------------------------------------------------------|-------|
| Italy        | Bertoncello C, Cazzaro R, Ferrareso A, Mazzer R, Moretti G. Prevalence of overweight and obesity among school-aged children in urban, rural and mountain areas of the Veneto Region, Italy. <i>Public Health Nutr.</i> 2008 Sep;11(9):887–90.                                                                                           | 2004  |
| Italy        | Binkin N, Fontana G, Lamberti A, Cattaneo C, Baglio G, Perra A, Spinelli A. A national survey of the prevalence of childhood overweight and obesity in Italy. <i>Obes Rev.</i> 2010 Jan;11(1):2–10.                                                                                                                                     | 2008  |
| Italy        | Celi F, Bini V, De Giorgi G, Molinari D, Faraoni F, Di Stefano G, Bacosi ML, Berlioli MG, Contessa G, Falorni A. Epidemiology of overweight and obesity among school children and adolescents in three provinces of central Italy, 1993-2001: study of potential influencing variables. <i>Eur J Clin Nutr.</i> 2003 Sep;57(9):1045–51. | 1993  |
| Italy        | Gallus S, Odone A, Lugo A, Bosetti C, Colombo P, Zuccaro P, La Vecchia C. Overweight and obesity prevalence and determinants in Italy: an update to 2010. <i>Eur J Nutr.</i> 2013 Mar;52(2):677–85.                                                                                                                                     | 2006  |
| Italy        | Gualdi-Russo E, Albertini A, Argnani L, Celenza F, Nicolucci M, Toselli S. Weight status and body image perception in Italian children. <i>J Hum Nutr Diet.</i> 2008 Feb;21(1):39–45.                                                                                                                                                   | 2000  |

| Country Name | Survey Name                                                                                                                                                                                                                                                      | Years |
|--------------|------------------------------------------------------------------------------------------------------------------------------------------------------------------------------------------------------------------------------------------------------------------|-------|
| Italy        | Gualdi-Russo E, Manzon VS, Masotti S, Toselli S, Albertini A, Celenza F, Zaccagni L. Weight status and perception of body image in children: the effect of maternal immigrant status. <i>Nutr J.</i> 2012;11:85.                                                 | 2004  |
| Italy        | Lazzeri G, Pammolli A, Pilato V, Giacchi MV. Relationship between 8/9-yr-old school children BMI, parents' BMI and educational level: a cross sectional survey. <i>Nutr J.</i> 2011;10:76.                                                                       | 2010  |
| Italy        | Lazzeri G, Pammolli A, Simi R, Pilato V, Giacchi MV. BMI from nutritional surveillance of 8-9 years old children in Tuscany (Italy). <i>J Prev Med Hyg.</i> 2011 Dec;52(4):181-5.                                                                                | 2008  |
| Italy        | Maffei C, Consolaro A, Cavarzere P, Chini L, Banzato C, Grezzani A, Silvagni D, Salzano G, De Luca F, Tatò L. Prevalence of overweight and obesity in 2- to 6-year-old Italian children. <i>Obesity (Silver Spring).</i> 2006 May;14(5):765-9.                   | 2002  |
| Italy        | Marcellini F, Giuli C, Papa R, Tirabassi G, Faloia E, Boscaro M, Polito A, Ciarapica D, Zaccaria M, Mocchegiani E. Obesity and body mass index (BMI) in relation to life-style and psycho-social aspects. <i>Arch Gerontol Geriatr.</i> 2009;49 Suppl 1:195-206. | 2006  |
| Italy        | Pagano R, La Vecchia C. Overweight and obesity in Italy, 1990-91. <i>Int. J. Obes. Relat. Metab. Disord.</i> 1994 Oct;18(10):665-9.                                                                                                                              | 1990  |



| Country Name | Survey Name                                                                                                                                                                                                                                                                                                                                                                         | Years |
|--------------|-------------------------------------------------------------------------------------------------------------------------------------------------------------------------------------------------------------------------------------------------------------------------------------------------------------------------------------------------------------------------------------|-------|
| Italy        | Pagano R, Negri E, Decarli A, La Vecchia C. Smoking and weight in the 1983 Italian National Health Survey. <i>Int J Obes.</i> 1987;11(4):333–8.                                                                                                                                                                                                                                     | 1983  |
| Italy        | Roskam A-JR, Kunst AE. The predictive value of different socio-economic indicators for overweight in nine European countries. <i>Public Health Nutr.</i> 2008 Dec;11(12):1256–66.                                                                                                                                                                                                   | 2000  |
| Italy        | Turconi G, Maccarini L, Bazzano R, Roggi C. Overweight and blood pressure: results from the examination of a selected group of adolescents in northern Italy. <i>Public Health Nutr.</i> 2008 Sep;11(9):905–13.                                                                                                                                                                     | 2001  |
| Italy        | Turconi G, Rossi M, Roggi C, Maccarini L. Nutritional status, dietary habits, nutritional knowledge and self-care assessment in a group of older adults attending community centres in Pavia, Northern Italy. <i>J Hum Nutr Diet.</i> 2013 Feb;26(1):48–55.                                                                                                                         | 2009  |
| Italy        | Wijnhoven TMA, van Raaij JMA, Spinelli A, Rito AI, Hovengen R, Kunesova M, Starc G, Rutter H, Sjöberg A, Petrauskiene A, O'Dwyer U, Petrova S, Farrugia Sant'angelo V, Wauters M, Yngve A, Rubana I-M, Breda J. WHO European Childhood Obesity Surveillance Initiative 2008: weight, height and body mass index in 6-9-year-old children. <i>Pediatr Obes.</i> 2013 Apr;8(2):79–97. | 2007  |
| Jamaica      | Jamaica Health and Lifestyle Survey                                                                                                                                                                                                                                                                                                                                                 | 2007  |

| Country Name | Survey Name                                                                                                                                                                                                              | Years     |
|--------------|--------------------------------------------------------------------------------------------------------------------------------------------------------------------------------------------------------------------------|-----------|
| Jamaica      | WHO STEPS Global School-Based Health Survey (GSHS)                                                                                                                                                                       | 2010      |
| Jamaica      | Fox K, Gordon-Strachan G, Johnson A, Ashley D. Jamaican youth health status 2005. West Indian Med J. 2009 Dec;58(6):533–8.                                                                                               | 2006      |
| Jamaica      | Ichinohe M, Mita R, Saito K, Shinkawa H, Nakaji S, Coombs M, Carney A, Wright B, Fuller EL. The prevalence of obesity and its relationship with lifestyle factors in Jamaica. Tohoku J. Exp. Med. 2005 Sep;207(1):21–32. | 1999      |
| Jamaica      | Ragoobirsingh D, Morrison EYSA, Johnson P, Lewis-Fuller E. Obesity in the Caribbean: the Jamaican experience. Diabetes Obes Metab. 2004 Jan;6(1):23–7.                                                                   | 2001      |
| Japan        | International Social Survey Programme (ISSP)                                                                                                                                                                             | 2011      |
| Japan        | Japan National Health and Nutrition Survey                                                                                                                                                                               | 1980-2011 |
| Japan        | Hayashi R, Iwasaki M, Otani T, Wang N, Miyazaki H, Yoshiaki S, Aoki S, Koyama H, Suzuki S. Body mass index and mortality in a middle-aged Japanese cohort. J Epidemiol. 2005 May;15(3):70–7.                             | 1993      |

| Country Name | Survey Name                                                                                                                                                                                                                                                                                                                                                       | Years                              |
|--------------|-------------------------------------------------------------------------------------------------------------------------------------------------------------------------------------------------------------------------------------------------------------------------------------------------------------------------------------------------------------------|------------------------------------|
| Japan        | Kadota A, Hozawa A, Okamura T, Kadowak T, Nakmaura K, Murakami Y, Hayakawa T, Kita Y, Okayama A, Nakamura Y, Kashiwagi A, Ueshima H, NIPPON DATA Research Group. Relationship between metabolic risk factor clustering and cardiovascular mortality stratified by high blood glucose and obesity: NIPPON DATA90, 1990-2000. Diabetes Care. 2007 Jun;30(6):1533-8. | 1990                               |
| Japan        | Matsushita Y, Takahashi Y, Mizoue T, Inoue M, Noda M, Tsugane S, JPHC Study Group. Overweight and obesity trends among Japanese adults: a 10-year follow-up of the JPHC Study. Int J Obes (Lond). 2008 Dec;32(12):1861-7.                                                                                                                                         | 1990, 1993, 1995, 1998, 2000, 2003 |
| Japan        | Nakano T, Sei M, Ewis AA, Munakata H, Onishi C, Nakahori Y. Tracking overweight and obesity in Japanese children; a six years longitudinal study. J. Med. Invest. 2010 Feb;57(1-2):114-23.                                                                                                                                                                        | 2001-2007                          |
| Japan        | Niizeki T, Takeishi Y, Takabatake N, Shibata Y, Konta T, Kato T, Kawata S, Kubota I. Circulating levels of heart-type fatty acid-binding protein in a general Japanese population: effects of age, gender, and physiologic characteristics. Circ. J. 2007 Sep;71(9):1452-7.                                                                                       | 2004                               |

| Country Name | Survey Name                                                                                                                                                                                                                                                                                                                                                                     | Years      |
|--------------|---------------------------------------------------------------------------------------------------------------------------------------------------------------------------------------------------------------------------------------------------------------------------------------------------------------------------------------------------------------------------------|------------|
| Japan        | Niwa Y, Yatsuya H, Tamakoshi K, Nishio K, Kondo T, Lin Y, Suzuki S, Wakai K, Tokudome S, Yamamoto A, Hamajima N, Toyoshima H, Tamakoshi A, JACC Study Group. Relationship between body mass index and the risk of ovarian cancer in the Japanese population: findings from the Japanese Collaborate Cohort (JACC) study. <i>J. Obstet. Gynaecol. Res.</i> 2005 Oct;31(5):452–8. | 1988       |
| Japan        | Saito I, Mori M, Shibata H, Hirose H, Tsujioka M, Kawabe H. Prevalence of metabolic syndrome in young men in Japan. <i>J. Atheroscler. Thromb.</i> 2007 Feb;14(1):27–30.                                                                                                                                                                                                        | 2004       |
| Japan        | Sakai R. Relationship between prevalence of childhood obesity in 17-year-olds and socioeconomic and environmental factors: prefecture-level analysis in Japan. <i>Asia Pac J Public Health.</i> 2013 Mar;25(2):159–69.                                                                                                                                                          | 2008       |
| Japan        | Sakamoto N, Yang L. BMI centile curves for Japanese children aged 5-17 years in 2000-2005. <i>Public Health Nutr.</i> 2009 Oct;12(10):1688–92.                                                                                                                                                                                                                                  | 2000, 2005 |
| Japan        | Sekine M, Yamagami T, Hamanishi S, Handa K, Saito T, Nanri S, Kawaminami K, Tokui N, Yoshida K, Kagamimori S. Parental obesity, lifestyle factors and obesity in preschool children: results of the Toyama Birth Cohort study. <i>J Epidemiol.</i> 2002 Jan;12(1):33–9.                                                                                                         | 1992       |

| Country Name | Survey Name                                                                                                                                                                                                                                                                                       | Years                              |
|--------------|---------------------------------------------------------------------------------------------------------------------------------------------------------------------------------------------------------------------------------------------------------------------------------------------------|------------------------------------|
| Japan        | Sun Y, Sekine M, Kagamimori S. Lifestyle and overweight among Japanese adolescents: the Toyama Birth Cohort Study. <i>J Epidemiol.</i> 2009;19(6):303–10.                                                                                                                                         | 2002                               |
| Japan        | Takahashi Y, Sakai M, Tokuda Y, Takahashi O, Ohde S, Nakayama T, Fukuhara S, Fukui T, Shimbo T. The relation between self-reported body weight and health-related quality of life: a cross-sectional study in Japan. <i>J Public Health (Oxf).</i> 2011 Dec;33(4):518–26.                         | 2003                               |
| Japan        | Tanaka K, Kiyohara Y, Kubo M, Matsumoto T, Tanizaki Y, Okubo K, Ninomiya T, Oishi Y, Shikata K, Iida M. Secular trends in the incidence, mortality, and survival rate of gastric cancer in a general Japanese population: the Hisayama study. <i>Cancer Causes Control.</i> 2005 Jun;16(5):573–8. | 1988                               |
| Japan        | Yoshiike N, Seino F, Tajima S, Arai Y, Kawano M, Furuhashi T, Inoue S. Twenty-year changes in the prevalence of overweight in Japanese adults: the National Nutrition Survey 1976-95. <i>Obes Rev.</i> 2002 Aug;3(3):183–90.                                                                      | 1981, 1986, 1991                   |
| Jordan       | STEPS Noncommunicable Disease Risk Factors Survey                                                                                                                                                                                                                                                 | 2004, 2007                         |
| Jordan       | Demographic and Health Survey (DHS)                                                                                                                                                                                                                                                               | 1990, 1997, 2002, 2007, 2009, 2012 |

| Country Name | Survey Name                                                                                                                                                                                                      | Years                  |
|--------------|------------------------------------------------------------------------------------------------------------------------------------------------------------------------------------------------------------------|------------------------|
| Jordan       | Hamaideh SH, Al-Khateeb RY, Al-Rawashdeh AB. Overweight and obesity and their correlates among Jordanian adolescents. J Nurs Scholarsh. 2010 Dec;42(4):387-94.                                                   | 2007                   |
| Jordan       | Khader YS, Batiha A, Jaddou H, Batiha Z, El-Khateeb M, Ajlouni K. Metabolic abnormalities associated with obesity in children and adolescents in Jordan. Int J Pediatr Obes. 2011 Aug;6(3-4):215-22.             | 2009                   |
| Jordan       | Zindah M, Belbeisi A, Walke H, Mokdad AH. Obesity and diabetes in Jordan: findings from the behavioral risk factor surveillance system, 2004. Prev Chronic Dis. 2008 Jan;5(1):A17.                               | 2004                   |
| Kazakhstan   | Multiple Indicator Cluster Survey (MICS)                                                                                                                                                                         | 2006, 2010             |
| Kazakhstan   | Demographic and Health Survey (DHS)                                                                                                                                                                              | 1995, 1999             |
| Kenya        | Demographic and Health Survey (DHS)                                                                                                                                                                              | 1993, 1998, 2003, 2008 |
| Kenya        | Multiple Indicator Cluster Survey (MICS)                                                                                                                                                                         | 2000                   |
| Kenya        | Steyn NP, Nel JH, Parker W, Ayah R, Mbithe D. Urbanisation and the nutrition transition: a comparison of diet and weight status of South African and Kenyan women. Scand J Public Health. 2012 May;40(3):229-38. | 2005                   |
| Kiribati     | STEPS Noncommunicable Disease Risk Factors Survey                                                                                                                                                                | 2004                   |
| Kuwait       | STEPS Noncommunicable Disease Risk Factors Survey                                                                                                                                                                | 2006                   |

| Country Name      | Survey Name                                                                                                                                                                                                                                                                                                       | Years                                    |
|-------------------|-------------------------------------------------------------------------------------------------------------------------------------------------------------------------------------------------------------------------------------------------------------------------------------------------------------------|------------------------------------------|
| <b>Kuwait</b>     | Al Zenki S, Al Omirah H, Al Hooti S, Al Hamad N, Jackson RT, Rao A, Al Jahmah N, Al Obaid I, Al Ghanim J, Al Somaie M, Zaghoul S, Al Othman A. High prevalence of metabolic syndrome among Kuwaiti adults--a wake-up call for public health intervention. Int J Environ Res Public Health. 2012 May;9(5):1984–96. | 2008                                     |
| <b>Kuwait</b>     | Zaghoul S, Al-Hooti SN, Al-Hamad N, Al-Zenki S, Alomirah H, Alayan I, Al-Attar H, Al-Othman A, Al-Shami E, Al-Somaie M, Jackson RT. Evidence for nutrition transition in Kuwait: over-consumption of macronutrients and obesity. Public Health Nutr. 2013 Apr;16(4):596–607.                                      | 2008                                     |
| <b>Kyrgyzstan</b> | Demographic and Health Survey (DHS)                                                                                                                                                                                                                                                                               | 1997                                     |
| <b>Kyrgyzstan</b> | Multiple Indicator Cluster Survey (MICS)                                                                                                                                                                                                                                                                          | 2005                                     |
| <b>Laos</b>       | STEPS Noncommunicable Disease Risk Factors Survey                                                                                                                                                                                                                                                                 | 2008                                     |
| <b>Laos</b>       | Multiple Indicator Cluster Survey (MICS)                                                                                                                                                                                                                                                                          | 2000, 2006, 2011                         |
| <b>Latvia</b>     | Health Behaviour in School-Aged Children                                                                                                                                                                                                                                                                          | 2001, 2005, 2009                         |
| <b>Latvia</b>     | Eurobarometer                                                                                                                                                                                                                                                                                                     | 2005                                     |
| <b>Latvia</b>     | Health Behavior Among Latvian Adult Population                                                                                                                                                                                                                                                                    | 1998, 2000, 2002, 2004, 2006, 2008, 2012 |
| <b>Latvia</b>     | Latvia Health Behavior Among the Adult Population 2010                                                                                                                                                                                                                                                            | 2010                                     |
| <b>Latvia</b>     | World Health Survey (WHS)                                                                                                                                                                                                                                                                                         | 2003                                     |

| Country Name | Survey Name                                                                                                                                                                                                                                                                                                                                                                  | Years      |
|--------------|------------------------------------------------------------------------------------------------------------------------------------------------------------------------------------------------------------------------------------------------------------------------------------------------------------------------------------------------------------------------------|------------|
| Latvia       | Pomerleau J, Pudule I, Grinberga D, Kadziauskiene K, Abaravicius A, Bartkeviciute R, Vaask S, Robertson A, McKee M. Patterns of body weight in the Baltic Republics. Public Health Nutr. 2000 Mar;3(1):3–10.                                                                                                                                                                 | 1997       |
| Latvia       | Wijnhoven TMA, van Raaij JMA, Spinelli A, Rito AI, Hovengen R, Kunesova M, Starc G, Rutter H, Sjöberg A, Petrauskiene A, O'Dwyer U, Petrova S, Farrugia Sant'angelo V, Wauters M, Yngve A, Rubana I-M, Breda J. WHO European Childhood Obesity Surveillance Initiative 2008: weight, height and body mass index in 6-9-year-old children. Pediatr Obes. 2013 Apr;8(2):79–97. | 2007       |
| Lebanon      | WHO Multicountry Survey on Health and Health System Responsiveness                                                                                                                                                                                                                                                                                                           | 2000       |
| Lebanon      | Lebanon Family Health Survey                                                                                                                                                                                                                                                                                                                                                 | 2004       |
| Lebanon      | STEPS Noncommunicable Disease Risk Factors Survey                                                                                                                                                                                                                                                                                                                            | 2008       |
| Lebanon      | Chacar HR, Salameh P. Public schools adolescents' obesity and growth curves in Lebanon. J Med Liban. 2011 Jun;59(2):80–8.                                                                                                                                                                                                                                                    | 2007       |
| Lesotho      | STEPS Noncommunicable Disease Risk Factors Survey                                                                                                                                                                                                                                                                                                                            | 2012       |
| Lesotho      | Demographic and Health Survey (DHS)                                                                                                                                                                                                                                                                                                                                          | 2004, 2009 |
| Lesotho      | Multiple Indicator Cluster Survey (MICS)                                                                                                                                                                                                                                                                                                                                     | 2000       |
| Liberia      | STEPS Noncommunicable Disease Risk Factors Survey                                                                                                                                                                                                                                                                                                                            | 2011       |
| Liberia      | Demographic and Health Survey (DHS)                                                                                                                                                                                                                                                                                                                                          | 2006       |



| Country Name | Survey Name                                                                                                                                                                                                                                                                                                                                                                  | Years            |
|--------------|------------------------------------------------------------------------------------------------------------------------------------------------------------------------------------------------------------------------------------------------------------------------------------------------------------------------------------------------------------------------------|------------------|
| Libya        | STEPS Noncommunicable Disease Risk Factors Survey                                                                                                                                                                                                                                                                                                                            | 2009             |
| Libya        | WHO STEPS Global School-Based Health Survey (GSHS)                                                                                                                                                                                                                                                                                                                           | 2007             |
| Lithuania    | Health Behaviour in School-Aged Children                                                                                                                                                                                                                                                                                                                                     | 2001, 2005, 2009 |
| Lithuania    | Eurobarometer                                                                                                                                                                                                                                                                                                                                                                | 2005             |
| Lithuania    | International Social Survey Programme (ISSP)                                                                                                                                                                                                                                                                                                                                 | 2011             |
| Lithuania    | Pomerleau J, Pudule I, Grinberga D, Kadziauskiene K, Abaravicius A, Bartkeviciute R, Vaask S, Robertson A, McKee M. Patterns of body weight in the Baltic Republics. Public Health Nutr. 2000 Mar;3(1):3-10.                                                                                                                                                                 | 1997             |
| Lithuania    | Wijnhoven TMA, van Raaij JMA, Spinelli A, Rito AI, Hovengen R, Kunesova M, Starc G, Rutter H, Sjöberg A, Petrauskiene A, O'Dwyer U, Petrova S, Farrugia Sant'angelo V, Wauters M, Yngve A, Rubana I-M, Breda J. WHO European Childhood Obesity Surveillance Initiative 2008: weight, height and body mass index in 6-9-year-old children. Pediatr Obes. 2013 Apr;8(2):79-97. | 2007             |
| Luxembourg   | Eurobarometer                                                                                                                                                                                                                                                                                                                                                                | 1989, 2005       |
| Luxembourg   | World Health Survey (WHS)                                                                                                                                                                                                                                                                                                                                                    | 2003             |
| Luxembourg   | Health Behaviour in School-Aged Children                                                                                                                                                                                                                                                                                                                                     | 2005, 2009       |
| Luxembourg   | Tchicaya A, Lorentz N. Socioeconomic inequality and obesity prevalence trends in Luxembourg, 1995-2007. BMC Res Notes. 2012;5:467.                                                                                                                                                                                                                                           | 1995, 2007       |
| Macedonia    | WHO STEPS Global School-Based Health Survey (GSHS)                                                                                                                                                                                                                                                                                                                           | 2007             |

| Country Name | Survey Name                                                                                                                                                                                                           | Years                  |
|--------------|-----------------------------------------------------------------------------------------------------------------------------------------------------------------------------------------------------------------------|------------------------|
| Macedonia    | Multiple Indicator Cluster Survey (MICS)                                                                                                                                                                              | 2005, 2011             |
| Macedonia    | Health Behaviour in School-Aged Children                                                                                                                                                                              | 2001, 2005, 2009       |
| Macedonia    | Macedonia Survey on the Health and Nutrition of the Elderly 1999                                                                                                                                                      | 1999                   |
| Madagascar   | Demographic and Health Survey (DHS)                                                                                                                                                                                   | 1992, 1997, 2003, 2008 |
| Madagascar   | STEPS Noncommunicable Disease Risk Factors Survey                                                                                                                                                                     | 2005                   |
| Malawi       | World Bank - Living Standards and Measurement Survey (LSMS)                                                                                                                                                           | 2010                   |
| Malawi       | Demographic and Health Survey (DHS)                                                                                                                                                                                   | 1992, 2000, 2004, 2010 |
| Malawi       | Multiple Indicator Cluster Survey (MICS)                                                                                                                                                                              | 2006                   |
| Malawi       | STEPS Noncommunicable Disease Risk Factors Survey                                                                                                                                                                     | 2009                   |
| Malaysia     | Adult Nutrition Survey                                                                                                                                                                                                | 2002                   |
| Malaysia     | STEPS Noncommunicable Disease Risk Factors Survey                                                                                                                                                                     | 2005                   |
| Malaysia     | Rampal L, Rampal S, Khor GL, Zain AM, Ooyub SB, Rahmat RB, Ghani SN, Krishnan J. A national study on the prevalence of obesity among 16,127 Malaysians. Asia Pacific journal of clinical nutrition. 2007;16(3):561-6. | 2004                   |
| Malaysia     | Sumarni Mohd G, Muhammad Amir K, Ibrahim Md S, Mohd Rodi I, Izzuna Mudla MG, Nurziyana I. Obesity among schoolchildren in Kuala Selangor: a cross-sectional study. Trop Biomed. 2006 Dec;23(2):148-54.                | 2003                   |
| Maldives     | Multiple Indicator Cluster Survey (MICS)                                                                                                                                                                              | 2001                   |

| Country Name     | Survey Name                                                                                                                                                                                                                                                                                                                                                                  | Years                  |
|------------------|------------------------------------------------------------------------------------------------------------------------------------------------------------------------------------------------------------------------------------------------------------------------------------------------------------------------------------------------------------------------------|------------------------|
| Maldives         | Demographic and Health Survey (DHS)                                                                                                                                                                                                                                                                                                                                          | 2009                   |
| Mali             | Demographic and Health Survey (DHS)                                                                                                                                                                                                                                                                                                                                          | 1987, 1995, 2001, 2006 |
| Mali             | STEPS Noncommunicable Disease Risk Factors Survey                                                                                                                                                                                                                                                                                                                            | 2007                   |
| Malta            | Health Behaviour in School-Aged Children                                                                                                                                                                                                                                                                                                                                     | 2001, 2005             |
| Malta            | Eurobarometer                                                                                                                                                                                                                                                                                                                                                                | 2005                   |
| Malta            | Malta Lifestyle Survey                                                                                                                                                                                                                                                                                                                                                       | 2003, 2007             |
| Malta            | Grech V, Farrugia Sant' Angelo V. Body mass index estimation in a school-entry aged cohort in Malta. Int J Pediatr Obes. 2009;4(2):126-8.                                                                                                                                                                                                                                    | 2007                   |
| Malta            | Wijnhoven TMA, van Raaij JMA, Spinelli A, Rito AI, Hovengen R, Kunesova M, Starc G, Rutter H, Sjöberg A, Petrauskiene A, O'Dwyer U, Petrova S, Farrugia Sant'angelo V, Wauters M, Yngve A, Rubana I-M, Breda J. WHO European Childhood Obesity Surveillance Initiative 2008: weight, height and body mass index in 6-9-year-old children. Pediatr Obes. 2013 Apr;8(2):79-97. | 2007                   |
| Marshall Islands | STEPS Noncommunicable Disease Risk Factors Survey                                                                                                                                                                                                                                                                                                                            | 2002                   |
| Mauritania       | Demographic and Health Survey (DHS)                                                                                                                                                                                                                                                                                                                                          | 2000                   |
| Mauritania       | Multiple Indicator Cluster Survey (MICS)                                                                                                                                                                                                                                                                                                                                     | 2007                   |
| Mauritius        | STEPS Noncommunicable Disease Risk Factors Survey                                                                                                                                                                                                                                                                                                                            | 2004                   |

| Country Name | Survey Name                                                                                                                                                                                                                                                                                       | Years      |
|--------------|---------------------------------------------------------------------------------------------------------------------------------------------------------------------------------------------------------------------------------------------------------------------------------------------------|------------|
| Mauritius    | Caleyachetty R, Rudnicka AR, Echouffo-Tcheugui JB, Siegel KR, Richards N, Whincup PH. Prevalence of overweight, obesity and thinness in 9-10 year old children in Mauritius. <i>Global Health</i> . 2012;8:28.                                                                                    | 2006       |
| Mauritius    | Dowse GK, Zimmet PZ, Gareeboo H, George K, Alberti MM, Tuomilehto J, Finch CF, Chitson P, Tulsidas H. Abdominal obesity and physical inactivity as risk factors for NIDDM and impaired glucose tolerance in Indian, Creole, and Chinese Mauritians. <i>Diabetes Care</i> . 1991 Apr;14(4):271-82. | 1987       |
| Mexico       | Mexico Survey of Health and Nutrition (ENSANUT) 2005                                                                                                                                                                                                                                              | 2005       |
| Mexico       | WHO Multicountry Survey on Health and Health System Responsiveness                                                                                                                                                                                                                                | 2000       |
| Mexico       | Mexican Health and Aging Study                                                                                                                                                                                                                                                                    | 2001, 2003 |
| Mexico       | Mexico Family Health Survey                                                                                                                                                                                                                                                                       | 2002, 2005 |
| Mexico       | WHO Study on Global Ageing and Adult Health (SAGE)                                                                                                                                                                                                                                                | 2009       |
| Mexico       | International Social Survey Programme (ISSP)                                                                                                                                                                                                                                                      | 2007       |
| Mexico       | Mexico Survey of Health and Nutrition (ENSANUT) 2011-2012                                                                                                                                                                                                                                         | 2011       |
| Mexico       | Mexico National Nutrition Survey (ENN)                                                                                                                                                                                                                                                            | 1999       |
| Mexico       | Aradillas-García C, Malacara JM, Garay-Sevilla ME, Guízar JM, Camacho N, De la Cruz-Mendoza E, Quemada L, Sierra JFH. Prediabetes in rural and urban children in 3 states in Mexico. <i>J Cardiometab Syndr</i> . 2007;2(1):35-9.                                                                 | 2004       |

| Country Name      | Survey Name                                                                                                                                                                                                           | Years            |
|-------------------|-----------------------------------------------------------------------------------------------------------------------------------------------------------------------------------------------------------------------|------------------|
| <b>Mexico</b>     | Eckhardt CL, Torheim LE, Monterrubio E, Barquera S, Ruel MT. The overlap of overweight and anaemia among women in three countries undergoing the nutrition transition. <i>Eur J Clin Nutr.</i> 2008 Feb;62(2):238–46. | 1998             |
| <b>Mexico</b>     | National Nutrition Survey                                                                                                                                                                                             | 1999             |
| <b>Moldova</b>    | Demographic and Health Survey (DHS)                                                                                                                                                                                   | 2005             |
| <b>Mongolia</b>   | STEPS Noncommunicable Disease Risk Factors Survey                                                                                                                                                                     | 2005             |
| <b>Mongolia</b>   | Multiple Indicator Cluster Survey (MICS)                                                                                                                                                                              | 2000, 2005, 2010 |
| <b>Mongolia</b>   | Dugee O, Khor GL, Lye M-S, Luvsannyam L, Janchiv O, Jamyan B, Esa N. Association of major dietary patterns with obesity risk among Mongolian men and women. <i>Asia Pac J Clin Nutr.</i> 2009;18(3):433–40.           | 2005             |
| <b>Montenegro</b> | Multiple Indicator Cluster Survey (MICS)                                                                                                                                                                              | 2005             |
| <b>Morocco</b>    | Demographic and Health Survey (DHS)                                                                                                                                                                                   | 1987, 1992, 2003 |
| <b>Morocco</b>    | Tazi MA, Abir-Khalil S, Lahmouz F, Arrach ML, Chaouki N. Risk factors for hypertension among the adult Moroccan population. <i>East. Mediterr. Health J.</i> 2009 Aug;15(4):827–41.                                   | 2000             |
| <b>Mozambique</b> | STEPS Noncommunicable Disease Risk Factors Survey                                                                                                                                                                     | 2005             |
| <b>Mozambique</b> | Demographic and Health Survey (DHS)                                                                                                                                                                                   | 1997, 2003, 2011 |
| <b>Mozambique</b> | Multiple Indicator Cluster Survey (MICS)                                                                                                                                                                              | 2008             |
| <b>Myanmar</b>    | WHO STEPS Global School-Based Health Survey (GSHS)                                                                                                                                                                    | 2007             |

| Country Name | Survey Name                                                                                                                                                                                   | Years                              |
|--------------|-----------------------------------------------------------------------------------------------------------------------------------------------------------------------------------------------|------------------------------------|
| Myanmar      | STEPS Noncommunicable Disease Risk Factors Survey                                                                                                                                             | 2009                               |
| Myanmar      | Multiple Indicator Cluster Survey (MICS)                                                                                                                                                      | 2000                               |
| Namibia      | Demographic and Health Survey (DHS)                                                                                                                                                           | 1992, 2000, 2006                   |
| Nepal        | STEPS Noncommunicable Disease Risk Factors Survey                                                                                                                                             | 2005, 2007                         |
| Nepal        | Demographic and Health Survey (DHS)                                                                                                                                                           | 1996, 2001, 2006, 2011             |
| Netherlands  | Health Behaviour in School-Aged Children                                                                                                                                                      | 2001, 2005, 2009                   |
| Netherlands  | National Food Consumption Survey                                                                                                                                                              | 1987, 1992, 1997, 2005, 2007, 2010 |
| Netherlands  | International Social Survey Programme (ISSP)                                                                                                                                                  | 2011                               |
| Netherlands  | Integrated System of Social Surveys (POLS) and Health Survey                                                                                                                                  | 2000-2009                          |
| Netherlands  | Eurobarometer                                                                                                                                                                                 | 1989, 2005                         |
| Netherlands  | Netherlands Risk Factors and Health Survey 2000                                                                                                                                               | 2000                               |
| Netherlands  | Netherlands Dutch National Bank Household Survey                                                                                                                                              | 1993-2009                          |
| Netherlands  | Survey of Health, Ageing and Retirement in Europe (SHARE)                                                                                                                                     | 2004, 2007, 2011                   |
| Netherlands  | Baecke JA, Burema J, Frijters JE, Hautvast JG, van der Wiel-Wetzels WA. Obesity in young Dutch adults: I, socio-demographic variables and body mass index. <i>Int J Obes.</i> 1983;7(1):1-12. | 1980                               |

| Country Name | Survey Name                                                                                                                                                                                                                                                                                                                | Years |
|--------------|----------------------------------------------------------------------------------------------------------------------------------------------------------------------------------------------------------------------------------------------------------------------------------------------------------------------------|-------|
| Netherlands  | Brug J, van Stralen MM, Te Velde SJ, Chinapaw MJM, De Bourdeaudhuij I, Lien N, Bere E, Maskini V, Singh AS, Maes L, Moreno L, Jan N, Kovacs E, Lobstein T, Manios Y. Differences in weight status and energy-balance related behaviors among schoolchildren across Europe: the ENERGY-project. PLoS ONE. 2012;7(4):e34742. | 2010  |
| Netherlands  | De Wit LM, van Straten A, van Herten M, Penninx BWJH, Cuijpers P. Depression and body mass index, a u-shaped association. BMC Public Health. 2009;9:14.                                                                                                                                                                    | 2001  |
| Netherlands  | Kupper NM, Schreurs H, Ten Klooster PM, Bode C, van Ameijden EJC. Prevention for elderly people: demand-oriented or problem-oriented? Health Policy. 2011 Sep;102(1):96–103.                                                                                                                                               | 2006  |
| Netherlands  | Ottova V, Erhart M, Rajmil L, Dettenborn-Betz L, Ravens-Sieberer U. Overweight and its impact on the health-related quality of life in children and adolescents: results from the European KIDSCREEN survey. Qual Life Res. 2012 Feb;21(1):59–69.                                                                          | 2003  |
| Netherlands  | Rodenburg G, Oenema A, Pasma M, Kremers SPJ, van de Mheen D. Clustering of food and activity preferences in primary school children. Appetite. 2013 Jan;60(1):123–32.                                                                                                                                                      | 2008  |

| Country Name | Survey Name                                                                                                                                                                                                                                                                                                                                 | Years            |
|--------------|---------------------------------------------------------------------------------------------------------------------------------------------------------------------------------------------------------------------------------------------------------------------------------------------------------------------------------------------|------------------|
| Netherlands  | Snoek HM, van Strien T, Janssens JMAM, Engels RCME. Emotional, external, restrained eating and overweight in Dutch adolescents. <i>Scand J Psychol.</i> 2007 Feb;48(1):23–32.                                                                                                                                                               | 2003             |
| Netherlands  | Steenhuis IHM, Bos AER, Mayer B. (Mis)interpretation of body weight in adult women and men. <i>J Hum Nutr Diet.</i> 2006 Jun;19(3):219–28.                                                                                                                                                                                                  | 2003             |
| Netherlands  | Van Strien T, Herman CP, Verheijden MW. Eating style, overeating and weight gain. A prospective 2-year follow-up study in a representative Dutch sample. <i>Appetite.</i> 2012 Dec;59(3):782–9.                                                                                                                                             | 2009             |
| Netherlands  | Visscher TLS, Viet AL, Kroesbergen IHT, Seidell JC. Underreporting of BMI in adults and its effect on obesity prevalence estimations in the period 1998 to 2001. <i>Obesity (Silver Spring).</i> 2006 Nov;14(11):2054–63.                                                                                                                   | 1998             |
| Netherlands  | Yngve A, De Bourdeaudhuij I, Wolf A, Grjibovski A, Brug J, Due P, Ehrenblad B, Elmadfa I, Franchini B, Klepp K-I, Poortvliet E, Rasmussen M, Thorsdottir I, Perez Rodrigo C. Differences in prevalence of overweight and stunting in 11-year olds across Europe: The Pro Children Study. <i>Eur J Public Health.</i> 2008 Apr;18(2):126–30. | 2003             |
| New Zealand  | Life in New Zealand Survey                                                                                                                                                                                                                                                                                                                  | 1989             |
| New Zealand  | New Zealand Health Survey                                                                                                                                                                                                                                                                                                                   | 2002, 2006, 2011 |
| New Zealand  | 2002 National Children's Nutrition Survey                                                                                                                                                                                                                                                                                                   | 2002             |



| Country Name | Survey Name                                                                                                                                                                                                                  | Years |
|--------------|------------------------------------------------------------------------------------------------------------------------------------------------------------------------------------------------------------------------------|-------|
| New Zealand  | New Zealand Adult Nutrition Survey 2008-2009                                                                                                                                                                                 | 2008  |
| New Zealand  | The Health and Wellbeing of New Zealand Secondary School Students in 2012 (Youth2000 Survey Series)                                                                                                                          | 2012  |
| New Zealand  | Youth'07 Survey                                                                                                                                                                                                              | 2007  |
| New Zealand  | International Social Survey Programme (ISSP)                                                                                                                                                                                 | 2007  |
| New Zealand  | New Zealand National Nutrition Survey 1997                                                                                                                                                                                   | 1996  |
| New Zealand  | Howe AS, Mandic S, Parnell WR, Skidmore PML. Attitudes to food differ between adolescent dieters and non-dieters from Otago, New Zealand, but overall food intake does not. Public Health Nutr. 2013 Jan;16(1):36–45.        | 2009  |
| New Zealand  | Leong SL, Madden C, Gray A, Horwath C. Self-determined, autonomous regulation of eating behavior is related to lower body mass index in a nationwide survey of middle-aged women. J Acad Nutr Diet. 2012 Sep;112(9):1337–46. | 2009  |
| New Zealand  | Rush E, Reed P, McLennan S, Coppinger T, Simmons D, Graham D. A school-based obesity control programme: Project Energize. Two-year outcomes. Br. J. Nutr. 2012 Feb;107(4):581–7.                                             | 2004  |

| Country Name | Survey Name                                                                                                                                                                                                                                                                          | Years      |
|--------------|--------------------------------------------------------------------------------------------------------------------------------------------------------------------------------------------------------------------------------------------------------------------------------------|------------|
| New Zealand  | Rush E, Reed PW, Simmons D, Coppinger T, McLennan S, Graham D. Baseline measures for a school-based obesity control programme: Project Energize: differences by ethnicity, rurality, age and school socio-economic status. <i>J Paediatr Child Health</i> . 2013 Apr;49(4):E324–331. | 2005       |
| New Zealand  | Utter J, Denny S, Crengle S, Ameratunga S, Robinson E, Clark T, Percival T, Maddison R. Overweight among New Zealand adolescents: associations with ethnicity and deprivation. <i>Int J Pediatr Obes</i> . 2010 Dec;5(6):461–6.                                                      | 2007       |
| New Zealand  | Utter J, Scragg R, Schaaf D, Fitzgerald E, Wilson N. Correlates of body mass index among a nationally representative sample of New Zealand children. <i>Int J Pediatr Obes</i> . 2007;2(2):104–13.                                                                                   | 2002       |
| New Zealand  | Wickens K, Barry D, Friezema A, Rhodius R, Bone N, Purdie G, Crane J. Obesity and asthma in 11-12 year old New Zealand children in 1989 and 2000. <i>Thorax</i> . 2005 Jan;60(1):7–12.                                                                                               | 1989, 2000 |
| Nicaragua    | World Bank - Living Standards and Measurement Survey (LSMS)                                                                                                                                                                                                                          | 2005       |
| Nicaragua    | Demographic and Health Survey (DHS)                                                                                                                                                                                                                                                  | 1997, 2001 |
| Nicaragua    | Reproductive Health Survey (RHS)                                                                                                                                                                                                                                                     | 2006       |
| Niger        | STEPS Noncommunicable Disease Risk Factors Survey                                                                                                                                                                                                                                    | 2007       |
| Niger        | Multiple Indicator Cluster Survey (MICS)                                                                                                                                                                                                                                             | 2000       |

| Country Name | Survey Name                                                                                                                                                                                                                                                                                                                                       | Years                        |
|--------------|---------------------------------------------------------------------------------------------------------------------------------------------------------------------------------------------------------------------------------------------------------------------------------------------------------------------------------------------------|------------------------------|
| Niger        | Demographic and Health Survey (DHS)                                                                                                                                                                                                                                                                                                               | 1992, 1998, 2006, 2012       |
| Nigeria      | WHO Multicountry Survey on Health and Health System Responsiveness                                                                                                                                                                                                                                                                                | 2000                         |
| Nigeria      | Demographic and Health Survey (DHS)                                                                                                                                                                                                                                                                                                               | 1986, 1990, 2003, 2008       |
| Nigeria      | Multiple Indicator Cluster Survey (MICS)                                                                                                                                                                                                                                                                                                          | 2007, 2011                   |
| Niue         | WHO STEPS Global School-Based Health Survey (GSHS)                                                                                                                                                                                                                                                                                                | 2010                         |
| North Korea  | STEPS Noncommunicable Disease Risk Factors Survey                                                                                                                                                                                                                                                                                                 | 2008                         |
| Norway       | Health Behaviour in School-Aged Children                                                                                                                                                                                                                                                                                                          | 2001, 2005, 2009             |
| Norway       | International Social Survey Programme (ISSP)                                                                                                                                                                                                                                                                                                      | 2012                         |
| Norway       | World Health Survey (WHS)                                                                                                                                                                                                                                                                                                                         | 2003                         |
| Norway       | Norway Survey of Living Conditions                                                                                                                                                                                                                                                                                                                | 1998, 2002, 2005, 2008, 2012 |
| Norway       | Bere E, Westersjø JH. Nature trips and traditional methods for food procurement in relation to weight status. Scand J Public Health. 2013 Mar;41(2):180-4.                                                                                                                                                                                        | 2008                         |
| Norway       | Bjelland M, Bergh IH, Grydeland M, Klepp K-I, Andersen LF, Anderssen SA, Ommundsen Y, Lien N. Changes in adolescents' intake of sugar-sweetened beverages and sedentary behaviour: results at 8 month mid-way assessment of the HEIA study--a comprehensive, multi-component school-based randomized trial. Int J Behav Nutr Phys Act. 2011;8:63. | 2007                         |

| Country Name | Survey Name                                                                                                                                                                                                                                                                                                                        | Years |
|--------------|------------------------------------------------------------------------------------------------------------------------------------------------------------------------------------------------------------------------------------------------------------------------------------------------------------------------------------|-------|
| Norway       | Bjornelv S, Lydersen S, Holmen J, Lund Nilsen TI, Holmen TL. Sex differences in time trends for overweight and obesity in adolescents: the Young-HUNT study. <i>Scand J Public Health</i> . 2009 Nov;37(8):881–9.                                                                                                                  | 1995  |
| Norway       | Brug J, van Stralen MM, Te Velde SJ, Chinapaw MJM, De Bourdeaudhuij I, Lien N, Bere E, Maskini V, Singh AS, Maes L, Moreno L, Jan N, Kovacs E, Lobstein T, Manios Y. Differences in weight status and energy-balance related behaviors among schoolchildren across Europe: the ENERGY-project. <i>PLoS ONE</i> . 2012;7(4):e34742. | 2010  |
| Norway       | Grøholt E-K, Stigum H, Nordhagen R. Overweight and obesity among adolescents in Norway: cultural and socio-economic differences. <i>J Public Health (Oxf)</i> . 2008 Sep;30(3):258–65.                                                                                                                                             | 2000  |
| Norway       | Hjartåker A, Laake P, Lund E. Body mass index and weight change attempts among adult women. The Norwegian Women and Cancer Study. <i>Eur J Public Health</i> . 2001 Jun;11(2):141–6.                                                                                                                                               | 1996  |
| Norway       | Júlíusson PB, Eide GE, Roelants M, Waaler PE, Hauspie R, Bjerknes R. Overweight and obesity in Norwegian children: prevalence and socio-demographic risk factors. <i>Acta Paediatr</i> . 2010 Jun;99(6):900–5.                                                                                                                     | 2003  |

| Country Name | Survey Name                                                                                                                                                                                                                                                                                                                                                                  | Years |
|--------------|------------------------------------------------------------------------------------------------------------------------------------------------------------------------------------------------------------------------------------------------------------------------------------------------------------------------------------------------------------------------------|-------|
| Norway       | Oellingrath IM, Svendsen MV, Brantsaeter AL. Eating patterns and overweight in 9- to 10-year-old children in Telemark County, Norway: a cross-sectional study. Eur J Clin Nutr. 2010 Nov;64(11):1272–9.                                                                                                                                                                      | 2007  |
| Norway       | Van der Sluis ME, Lien N, Twisk JWR, Steenhuis IHM, Bere E, Klepp K-I, Wind M. Longitudinal associations of energy balance-related behaviours and cross-sectional associations of clusters and body mass index in Norwegian adolescents. Public Health Nutr. 2010 Oct;13(10A):1716–21.                                                                                       | 2005  |
| Norway       | Wijnhoven TMA, van Raaij JMA, Spinelli A, Rito AI, Hovengen R, Kunesova M, Starc G, Rutter H, Sjöberg A, Petrauskiene A, O'Dwyer U, Petrova S, Farrugia Sant'angelo V, Wauters M, Yngve A, Rubana I-M, Breda J. WHO European Childhood Obesity Surveillance Initiative 2008: weight, height and body mass index in 6-9-year-old children. Pediatr Obes. 2013 Apr;8(2):79–97. | 2007  |
| Norway       | Yngve A, De Bourdeaudhuij I, Wolf A, Grjibovski A, Brug J, Due P, Ehrenblad B, Elmadfa I, Franchini B, Klepp K-I, Poortvliet E, Rasmussen M, Thorsdottir I, Perez Rodrigo C. Differences in prevalence of overweight and stunting in 11-year olds across Europe: The Pro Children Study. Eur J Public Health. 2008 Apr;18(2):126–30.                                         | 2003  |
| Oman         | Oman National Health Survey 2000                                                                                                                                                                                                                                                                                                                                             | 2000  |

| Country Name            | Survey Name                                                                                                                                                                                                       | Years                                                      |
|-------------------------|-------------------------------------------------------------------------------------------------------------------------------------------------------------------------------------------------------------------|------------------------------------------------------------|
| <b>Oman</b>             | STEPS Noncommunicable Disease Risk Factors Survey                                                                                                                                                                 | 2006                                                       |
| <b>Oman</b>             | Al-Lawati JA, Jousilahti PJ. Prevalence and 10-year secular trend of obesity in Oman. Saudi Med J. 2004 Mar;25(3):346-51.                                                                                         | 1991                                                       |
| <b>Pakistan</b>         | Demographic and Health Survey (DHS)                                                                                                                                                                               | 1990, 2012                                                 |
| <b>Pakistan</b>         | Pakistan National Nutrition Survey Report                                                                                                                                                                         | 2010                                                       |
| <b>Pakistan</b>         | WHO STEPS Global School-Based Health Survey (GSHS)                                                                                                                                                                | 2009                                                       |
| <b>Pakistan</b>         | Khan AH, Iqbal R, Naureen G, Dar FJ, Ahmed FN. Prevalence of vitamin D deficiency and its correlates: results of a community-based study conducted in Karachi, Pakistan. Arch Osteoporos. 2012 Dec;7(1-2):275-82. | 2011                                                       |
| <b>Palestine</b>        | STEPS Noncommunicable Disease Risk Factors Survey                                                                                                                                                                 | 2010                                                       |
| <b>Panama</b>           | Living Standards Survey                                                                                                                                                                                           | 1982, 2003                                                 |
| <b>Papua New Guinea</b> | STEPS Noncommunicable Disease Risk Factors Survey                                                                                                                                                                 | 2007                                                       |
| <b>Paraguay</b>         | Demographic and Health Survey (DHS)                                                                                                                                                                               | 1990                                                       |
| <b>Paraguay</b>         | STEPS Noncommunicable Disease Risk Factors Survey                                                                                                                                                                 | 2011                                                       |
| <b>Peru</b>             | WHO STEPS Global School-Based Health Survey (GSHS)                                                                                                                                                                | 2010                                                       |
| <b>Peru</b>             | Demographic and Health Survey (DHS)                                                                                                                                                                               | 1991, 1996, 2000, 2005, 2007, 2008, 2009, 2010, 2011, 2012 |

| Country Name       | Survey Name                                                                                                                                                                                                                              | Years                              |
|--------------------|------------------------------------------------------------------------------------------------------------------------------------------------------------------------------------------------------------------------------------------|------------------------------------|
| <b>Peru</b>        | Peru National Living Standards and Measurement Survey                                                                                                                                                                                    | 2000                               |
| <b>Philippines</b> | Demographic and Health Survey (DHS)                                                                                                                                                                                                      | 1993                               |
| <b>Philippines</b> | Philippines National Nutrition Survey                                                                                                                                                                                                    | 1993, 1998, 2003, 2005, 2008, 2011 |
| <b>Philippines</b> | Philippines - Cebu Longitudinal Health and Nutrition Survey                                                                                                                                                                              | 2002, 2004                         |
| <b>Philippines</b> | International Social Survey Programme (ISSP)                                                                                                                                                                                             | 2007, 2011                         |
| <b>Poland</b>      | International Social Survey Programme (ISSP)                                                                                                                                                                                             | 2007, 2013                         |
| <b>Poland</b>      | Health Behaviour in School-Aged Children                                                                                                                                                                                                 | 2001, 2005, 2009                   |
| <b>Poland</b>      | Survey of Health, Ageing and Retirement in Europe (SHARE)                                                                                                                                                                                | 2007                               |
| <b>Poland</b>      | Eurobarometer                                                                                                                                                                                                                            | 2005                               |
| <b>Poland</b>      | Chrzanowska M, Koziel S, Ulijaszek SJ. Changes in BMI and the prevalence of overweight and obesity in children and adolescents in Cracow, Poland, 1971-2000. <i>Econ Hum Biol.</i> 2007 Dec;5(3):370–8.                                  | 1983, 2000                         |
| <b>Poland</b>      | Jodkowska M, Oblacinska A, Tabak I. Overweight and obesity among adolescents in Poland: gender and regional differences. <i>Public Health Nutr.</i> 2010 Oct;13(10A):1688–92.                                                            | 2005                               |
| <b>Poland</b>      | Matusik P, Malecka-Tendera E, Klimek K, Polish Childhood Obesity Study Group. Nutritional state of Polish prepubertal children assessed by population-specific and international standards. <i>Acta Paediatr.</i> 2007 Feb;96(2):276–80. | 2001                               |

| Country Name | Survey Name                                                                                                                                                                                                                                                                                                                                                                  | Years            |
|--------------|------------------------------------------------------------------------------------------------------------------------------------------------------------------------------------------------------------------------------------------------------------------------------------------------------------------------------------------------------------------------------|------------------|
| Poland       | Mazur A, Klimek K, Telega G, Hejda G, Wdowiak L, Ma?ecka-Tendera E. Risk factors for obesity development in school children from south-eastern Poland. Ann Agric Environ Med. 2008 Dec;15(2):281-5.                                                                                                                                                                          | 1998             |
| Poland       | Ottova V, Erhart M, Rajmil L, Dettenborn-Betz L, Ravens-Sieberer U. Overweight and its impact on the health-related quality of life in children and adolescents: results from the European KIDSCREEN survey. Qual Life Res. 2012 Feb;21(1):59-69.                                                                                                                            | 2003             |
| Portugal     | Survey of Health, Ageing and Retirement in Europe (SHARE)                                                                                                                                                                                                                                                                                                                    | 2011             |
| Portugal     | Health Behaviour in School-Aged Children                                                                                                                                                                                                                                                                                                                                     | 2001, 2005, 2009 |
| Portugal     | Eurobarometer                                                                                                                                                                                                                                                                                                                                                                | 2005             |
| Portugal     | Portugal National Health Survey 2005-2006                                                                                                                                                                                                                                                                                                                                    | 2005             |
| Portugal     | International Social Survey Programme (ISSP)                                                                                                                                                                                                                                                                                                                                 | 2013             |
| Portugal     | World Health Survey (WHS)                                                                                                                                                                                                                                                                                                                                                    | 2003             |
| Portugal     | Wijnhoven TMA, van Raaij JMA, Spinelli A, Rito AI, Hovengen R, Kunesova M, Starc G, Rutter H, Sjöberg A, Petrauskiene A, O'Dwyer U, Petrova S, Farrugia Sant'angelo V, Wauters M, Yngve A, Rubana I-M, Breda J. WHO European Childhood Obesity Surveillance Initiative 2008: weight, height and body mass index in 6-9-year-old children. Pediatr Obes. 2013 Apr;8(2):79-97. | 2007             |



| Country Name | Survey Name                                                                                                                                                                                                                             | Years |
|--------------|-----------------------------------------------------------------------------------------------------------------------------------------------------------------------------------------------------------------------------------------|-------|
| Portugal     | Ferreira RJ, Marques-Vidal PM. Prevalence and determinants of obesity in children in public schools of Sintra, Portugal. <i>Obesity (Silver Spring)</i> . 2008 Feb;16(2):497–500.                                                       | 2004  |
| Portugal     | Marques-Vidal P, Paccaud F, Ravasco P. Ten-year trends in overweight and obesity in the adult Portuguese population, 1995 to 2005. <i>BMC Public Health</i> . 2011;11:772.                                                              | 1995  |
| Portugal     | Moreira P, Padez C, Mourão I, Rosado V. Dietary calcium and body mass index in Portuguese children. <i>Eur J Clin Nutr</i> . 2005 Jul;59(7):861–7.                                                                                      | 2002  |
| Portugal     | Moreira P, Padrão P. Educational, economic and dietary determinants of obesity in Portuguese adults: a cross-sectional study. <i>Eat Behav</i> . 2006 Aug;7(3):220–8.                                                                   | 1998  |
| Portugal     | Roskam A-JR, Kunst AE. The predictive value of different socio-economic indicators for overweight in nine European countries. <i>Public Health Nutr</i> . 2008 Dec;11(12):1256–66.                                                      | 2000  |
| Portugal     | Santos R, Santos MP, Ribeiro JC, Mota J. Physical activity and other lifestyle behaviors in a Portuguese sample of adults: results from the Azorean Physical Activity and Health Study. <i>J Phys Act Health</i> . 2009 Nov;6(6):750–9. | 2004  |

| Country Name       | Survey Name                                                                                                                                                                                                                                                                                                                                  | Years |
|--------------------|----------------------------------------------------------------------------------------------------------------------------------------------------------------------------------------------------------------------------------------------------------------------------------------------------------------------------------------------|-------|
| <b>Portugal</b>    | Sardinha LB, Santos R, Vale S, Silva AM, Ferreira JP, Raimundo AM, Moreira H, Baptista F, Mota J. Prevalence of overweight and obesity among Portuguese youth: a study in a representative sample of 10-18-year-old children and adolescents. <i>Int J Pediatr Obes</i> . 2011 Jun;6(2-2):e124-128.                                          | 2008  |
| <b>Portugal</b>    | Yngve A, De Bourdeaudhuij I, Wolf A, Grjibovski A, Brug J, Due P, Ehrenblad B, Elmadfa I, Franchini B, Klepp K-I, Poortvliet E, Rasmussen M, Thorsdottir I, Perez Rodrigo C. Differences in prevalence of overweight and stunting in 11-year olds across Europe: The Pro Children Study. <i>Eur J Public Health</i> . 2008 Apr;18(2):126-30. | 2003  |
| <b>Puerto Rico</b> | González-Rodríguez LA, Felici-Giovanini ME, Haddock L. Thyroid dysfunction in an adult female population: A population-based study of Latin American Vertebral Osteoporosis Study (LAVOS) - Puerto Rico site. <i>P R Health Sci J</i> . 2013 Jun;32(2):57-62.                                                                                | 2003  |
| <b>Puerto Rico</b> | Pérez CM, Guzmán M, Ortiz AP, Estrella M, Valle Y, Pérez N, Haddock L, Suárez E. Prevalence of the metabolic syndrome in San Juan, Puerto Rico. <i>Ethn Dis</i> . 2008;18(4):434-41.                                                                                                                                                         | 2005  |
| <b>Qatar</b>       | STEPS Noncommunicable Disease Risk Factors Survey                                                                                                                                                                                                                                                                                            | 2012  |

| Country Name   | Survey Name                                                                                                                                                                                                                                                     | Years                  |
|----------------|-----------------------------------------------------------------------------------------------------------------------------------------------------------------------------------------------------------------------------------------------------------------|------------------------|
| <b>Qatar</b>   | Bener A, Tewfik I. Prevalence of overweight, obesity, and associated psychological problems in Qatari's female population. <i>Obes Rev.</i> 2006 May;7(2):139-45.                                                                                               | 2004                   |
| <b>Qatar</b>   | Bener A, Zirie M, Musallam M, Khader YS, Al-Hamaq AOAA. Prevalence of metabolic syndrome according to Adult Treatment Panel III and International Diabetes Federation criteria: a population-based study. <i>Metab Syndr Relat Disord.</i> 2009 Jun;7(3):221-9. | 2007                   |
| <b>Romania</b> | Eurobarometer                                                                                                                                                                                                                                                   | 2005                   |
| <b>Romania</b> | Health Behaviour in School-Aged Children                                                                                                                                                                                                                        | 2005, 2009             |
| <b>Russia</b>  | Russia Longitudinal Monitoring Survey                                                                                                                                                                                                                           | 1992-2003              |
| <b>Russia</b>  | WHO Study on Global Ageing and Adult Health (SAGE)                                                                                                                                                                                                              | 2007                   |
| <b>Russia</b>  | World Health Survey (WHS)                                                                                                                                                                                                                                       | 2003                   |
| <b>Russia</b>  | Health Behaviour in School-Aged Children                                                                                                                                                                                                                        | 2001, 2005, 2009       |
| <b>Russia</b>  | International Social Survey Programme (ISSP)                                                                                                                                                                                                                    | 2007, 2011             |
| <b>Russia</b>  | Jahns L, Adair L, Mroz T, Popkin BM. The declining prevalence of overweight among Russian children: income, diet, and physical activity behavior changes. <i>Econ Hum Biol.</i> 2012 Mar;10(2):139-46.                                                          | 1995                   |
| <b>Rwanda</b>  | Demographic and Health Survey (DHS)                                                                                                                                                                                                                             | 1992, 2000, 2005, 2010 |
| <b>Rwanda</b>  | Multiple Indicator Cluster Survey (MICS)                                                                                                                                                                                                                        | 2000                   |

| Country Name                 | Survey Name                                                                                                                                                                                                                                                              | Years |
|------------------------------|--------------------------------------------------------------------------------------------------------------------------------------------------------------------------------------------------------------------------------------------------------------------------|-------|
| <b>Saint Lucia</b>           | Gardner K, Bird J, Canning PM, Frizzell LM, Smith LM. Prevalence of overweight, obesity and underweight among 5-year-old children in Saint Lucia by three methods of classification and a comparison with historical rates. Child Care Health Dev. 2011 Jan;37(1):143–9. | 2006  |
| <b>Samoa</b>                 | STEPS Noncommunicable Disease Risk Factors Survey                                                                                                                                                                                                                        | 2002  |
| <b>Sao Tome and Principe</b> | Demographic and Health Survey (DHS)                                                                                                                                                                                                                                      | 2008  |
| <b>Sao Tome and Principe</b> | STEPS Noncommunicable Disease Risk Factors Survey                                                                                                                                                                                                                        | 2008  |
| <b>Saudi Arabia</b>          | Saudi Arabia Health Interview Survey                                                                                                                                                                                                                                     | 2013  |
| <b>Saudi Arabia</b>          | STEPS Noncommunicable Disease Risk Factors Survey                                                                                                                                                                                                                        | 2004  |
| <b>Saudi Arabia</b>          | Al-Baghli NA, Al-Ghamdi AJ, Al-Turki KA, El-Zubaier AG, Al-Ameer MM, Al-Baghli FA. Overweight and obesity in the eastern province of Saudi Arabia. Saudi Med J. 2008 Sep;29(9):1319–25.                                                                                  | 2004  |
| <b>Saudi Arabia</b>          | Al-Nozha MM, Al-Mazrou YY, Al-Maatouq MA, Arafah MR, Khalil MZ, Khan NB, Al-Marzouki K, Abdullah MA, Al-Khadra AH, Al-Harhi SS, Al-Shahid MS, Al-Mobeireek A, Nouh MS. Obesity in Saudi Arabia. Saudi Med J. 2005 May;26(5):824–9.                                       | 1995  |

| Country Name | Survey Name                                                                                                                                                                                                                                | Years                  |
|--------------|--------------------------------------------------------------------------------------------------------------------------------------------------------------------------------------------------------------------------------------------|------------------------|
| Saudi Arabia | Al-Othaimen AI, Al-Nozha M, Osman AK. Obesity: an emerging problem in Saudi Arabia. Analysis of data from the National Nutrition Survey. East. Mediterr. Health J. 2007 Apr;13(2):441–8.                                                   | 1985                   |
| Saudi Arabia | Amin TT, Al-Sultan AI, Ali A. Overweight and obesity and their relation to dietary habits and socio-demographic characteristics among male primary school children in Al-Hassa, Kingdom of Saudi Arabia. Eur J Nutr. 2008 Sep;47(6):310–8. | 2005                   |
| Saudi Arabia | El-Hazmi MAF, Warsy AS. A comparative study of prevalence of overweight and obesity in children in different provinces of Saudi Arabia. J. Trop. Pediatr. 2002 Jun;48(3):172–7.                                                            | 1994                   |
| Saudi Arabia | Osman AK, al-Nozha MM. Risk factors of coronary artery disease in different regions of Saudi Arabia. East. Mediterr. Health J. 2000 May;6(2-3):465–74.                                                                                     | 1989                   |
| Saudi Arabia | al-Nuaim AR, al-Rubeaan K, al-Mazrou Y, al-Attas O, al-Daghari N, Khoja T. High prevalence of overweight and obesity in Saudi Arabia. Int. J. Obes. Relat. Metab. Disord. 1996 Jun;20(6):547–52.                                           | 1990                   |
| Senegal      | Demographic and Health Survey (DHS)                                                                                                                                                                                                        | 1986, 1992, 2005, 2010 |
| Senegal      | Multiple Indicator Cluster Survey (MICS)                                                                                                                                                                                                   | 2000                   |

| Country Name | Survey Name                                                                                                                                                                                                                                                                                                                             | Years            |
|--------------|-----------------------------------------------------------------------------------------------------------------------------------------------------------------------------------------------------------------------------------------------------------------------------------------------------------------------------------------|------------------|
| Senegal      | Pessinaba S, Mbaye A, Kane A, Guene BD, Mbaye Ndour M, Niang K, Jobe M, Cazaubon M, Mathieu J-BS, Kane M, Sow DD, Diack B, Kane A. [Screening for asymptomatic peripheral arterial occlusive disease of the lower limbs by measuring the ankle-brachial index in the general population (Senegal)]. J Mal Vasc. 2012 Jul;37(4):195–200. | 2010             |
| Serbia       | Multiple Indicator Cluster Survey (MICS)                                                                                                                                                                                                                                                                                                | 1999, 2005, 2010 |
| Serbia       | Serbia National Health Survey                                                                                                                                                                                                                                                                                                           | 2006             |
| Seychelles   | STEPS Noncommunicable Disease Risk Factors Survey                                                                                                                                                                                                                                                                                       | 1989, 2004       |
| Seychelles   | Bovet P, Chiolero A, Shamlaye C, Paccaud F. Prevalence of overweight in the Seychelles: 15 year trends and association with socio-economic status. Obes Rev. 2008 Nov;9(6):511–7.                                                                                                                                                       | 1989, 1994, 2004 |
| Seychelles   | Chiolero A, Madeleine G, Gabriel A, Burnier M, Paccaud F, Bovet P. Prevalence of elevated blood pressure and association with overweight in children of a rapidly developing country. J Hum Hypertens. 2007 Feb;21(2):120–7.                                                                                                            | 2002             |
| Seychelles   | Tappy L, Bovet P, Shamlaye C. Prevalence of diabetes and obesity in the adult population of the Seychelles. Diabet. Med. 1991 Jun;8(5):448–52.                                                                                                                                                                                          | 1988             |
| Sierra Leone | Demographic and Health Survey (DHS)                                                                                                                                                                                                                                                                                                     | 2008             |

| Country Name | Survey Name                                                                                                                                                                                                                                                     | Years            |
|--------------|-----------------------------------------------------------------------------------------------------------------------------------------------------------------------------------------------------------------------------------------------------------------|------------------|
| Sierra Leone | STEPS Noncommunicable Disease Risk Factors Survey                                                                                                                                                                                                               | 2009             |
| Sierra Leone | Multiple Indicator Cluster Survey (MICS)                                                                                                                                                                                                                        | 2000, 2005, 2010 |
| Singapore    | Singapore National Health Survey                                                                                                                                                                                                                                | 1998, 2004, 2010 |
| Singapore    | Singapore National Health Surveillance Survey 2007                                                                                                                                                                                                              | 2007             |
| Singapore    | Subramaniam M, Picco L, He V, Vaingankar JA, Abdin E, Verma S, Rekhi G, Yap M, Lee J, Chong SA. Body mass index and risk of mental disorders in the general population: results from the Singapore Mental Health Study. J Psychosom Res. 2013 Feb;74(2):135–41. | 2009             |
| Slovakia     | International Social Survey Programme (ISSP)                                                                                                                                                                                                                    | 2007             |
| Slovakia     | Slovakia National Anthropometric Survey                                                                                                                                                                                                                         | 2001             |
| Slovakia     | Eurobarometer                                                                                                                                                                                                                                                   | 2005             |
| Slovakia     | World Health Survey (WHS)                                                                                                                                                                                                                                       | 2003             |
| Slovakia     | WHO Multicountry Survey on Health and Health System Responsiveness                                                                                                                                                                                              | 2000             |
| Slovakia     | Health Behaviour in School-Aged Children 2005/2006                                                                                                                                                                                                              | 2005, 2009       |
| Slovenia     | International Social Survey Programme (ISSP)                                                                                                                                                                                                                    | 2011             |
| Slovenia     | Survey of Health, Ageing and Retirement in Europe (SHARE)                                                                                                                                                                                                       | 2011             |
| Slovenia     | European Health Interview Survey                                                                                                                                                                                                                                | 2007             |
| Slovenia     | Eurobarometer                                                                                                                                                                                                                                                   | 2005             |
| Slovenia     | Health Behaviour in School-Aged Children                                                                                                                                                                                                                        | 2001, 2005, 2009 |

| Country Name           | Survey Name                                                                                                                                                                                                                                                                                                                                                                  | Years     |
|------------------------|------------------------------------------------------------------------------------------------------------------------------------------------------------------------------------------------------------------------------------------------------------------------------------------------------------------------------------------------------------------------------|-----------|
| <b>Slovenia</b>        | Brug J, van Stralen MM, Te Velde SJ, Chinapaw MJM, De Bourdeaudhuij I, Lien N, Bere E, Maskini V, Singh AS, Maes L, Moreno L, Jan N, Kovacs E, Lobstein T, Manios Y. Differences in weight status and energy-balance related behaviors among schoolchildren across Europe: the ENERGY-project. PLoS ONE. 2012;7(4):e34742.                                                   | 2010      |
| <b>Slovenia</b>        | Leskosek B, Strel J, Kovac M. Overweight and obesity in Slovenian schoolgirls, 1991-2006. Coll Antropol. 2010 Dec;34(4):1303-8.                                                                                                                                                                                                                                              | 1991-2006 |
| <b>Slovenia</b>        | Starc G, Strel J. Tracking excess weight and obesity from childhood to young adulthood: a 12-year prospective cohort study in Slovenia. Public Health Nutr. 2011 Jan;14(1):49-55.                                                                                                                                                                                            | 2008      |
| <b>Slovenia</b>        | Wijnhoven TMA, van Raaij JMA, Spinelli A, Rito AI, Hovengen R, Kunesova M, Starc G, Rutter H, Sjöberg A, Petrauskiene A, O'Dwyer U, Petrova S, Farrugia Sant'angelo V, Wauters M, Yngve A, Rubana I-M, Breda J. WHO European Childhood Obesity Surveillance Initiative 2008: weight, height and body mass index in 6-9-year-old children. Pediatr Obes. 2013 Apr;8(2):79-97. | 2007      |
| <b>Solomon Islands</b> | STEPS Noncommunicable Disease Risk Factors Survey                                                                                                                                                                                                                                                                                                                            | 2005      |
| <b>Somalia</b>         | Multiple Indicator Cluster Survey (MICS)                                                                                                                                                                                                                                                                                                                                     | 2006      |



| Country Name | Survey Name                                                                                                                                                                                                                                                                                                   | Years                                    |
|--------------|---------------------------------------------------------------------------------------------------------------------------------------------------------------------------------------------------------------------------------------------------------------------------------------------------------------|------------------------------------------|
| South Africa | The South African National Health and Nutrition Examination Survey (SANational Health and Nutrition Examination Survey (NHANES)-1)                                                                                                                                                                            | 2013                                     |
| South Africa | Demographic and Health Survey (DHS)                                                                                                                                                                                                                                                                           | 1998, 2003                               |
| South Africa | South Africa Integrated Family Survey                                                                                                                                                                                                                                                                         | 1999                                     |
| South Africa | South Africa Kwazulu Natal Income DynaMultiple Indicator Cluster Survey (MICS) Study                                                                                                                                                                                                                          | 1993, 1998, 2004                         |
| South Africa | Armstrong MEG, Lambert MI, Sharwood KA, Lambert EV. Obesity and overweight in South African primary school children -- the Health of the Nation Study. S. Afr. Med. J. 2006 May;96(5):439-44.                                                                                                                 | 2001                                     |
| South Africa | Kruger R, Kruger HS, Macintyre UE. The determinants of overweight and obesity among 10- to 15-year-old schoolchildren in the North West Province, South Africa - the THUSA BANA (Transition and Health during Urbanisation of South Africans; BANA, children) study. Public Health Nutr. 2006 May;9(3):351-8. | 2000                                     |
| South Africa | National Income Dynamics Study                                                                                                                                                                                                                                                                                | 2008, 2010, 2012                         |
| South Korea  | International Social Survey Programme (ISSP)                                                                                                                                                                                                                                                                  | 2007, 2011                               |
| South Korea  | Korean Longitudinal Study of Aging                                                                                                                                                                                                                                                                            | 2006                                     |
| South Korea  | National Health and Examination of Nutrition Survey                                                                                                                                                                                                                                                           | 1998, 2001, 2005, 2007, 2008, 2009, 2011 |

| Country Name | Survey Name                                                                                                                                                                                                                                | Years                                          |
|--------------|--------------------------------------------------------------------------------------------------------------------------------------------------------------------------------------------------------------------------------------------|------------------------------------------------|
| South Korea  | Jones DW, Kim JS, Andrew ME, Kim SJ, Hong YP. Body mass index and blood pressure in Korean men and women: the Korean National Blood Pressure Survey. <i>J. Hypertens.</i> 1994 Dec;12(12):1433-7.                                          | 1990                                           |
| South Korea  | Lee K, Lee S, Kim SY, Kim SJ, Kim YJ. Percent body fat cutoff values for classifying overweight and obesity recommended by the International Obesity Task Force (IOTF) in Korean children. <i>Asia Pac J Clin Nutr.</i> 2007;16(4):649-55. | 2003                                           |
| South Korea  | Lee K, Song Y-M. Parent-reported appetite of a child and the child's weight status over a 2-year period in Korean children. <i>J Am Diet Assoc.</i> 2007 Apr;107(4):678-80.                                                                | 2001                                           |
| South Sudan  | Multiple Indicator Cluster Survey (MICS)                                                                                                                                                                                                   | 2000                                           |
| Spain        | Survey of Health, Ageing and Retirement in Europe (SHARE)                                                                                                                                                                                  | 2004, 2007, 2011                               |
| Spain        | World Health Survey (WHS)                                                                                                                                                                                                                  | 2003                                           |
| Spain        | Spain National Health Survey                                                                                                                                                                                                               | 1987, 1993, 1995, 1997, 2001, 2003, 2006, 2011 |
| Spain        | Health Behaviour in School-Aged Children                                                                                                                                                                                                   | 2001, 2005, 2009                               |
| Spain        | The ALADINO Study: A National Study of Prevalence of Overweight and Obesity in Spanish Children in 2011                                                                                                                                    | 2010                                           |
| Spain        | Eurobarometer                                                                                                                                                                                                                              | 1989, 2005                                     |

| Country Name | Survey Name                                                                                                                                                                                                                                                                                                                       | Years |
|--------------|-----------------------------------------------------------------------------------------------------------------------------------------------------------------------------------------------------------------------------------------------------------------------------------------------------------------------------------|-------|
| Spain        | Alvarez-Torices JC, Franch-Nadal J, Alvarez-Guisasola F, Hernandez-Mejia R, Cueto-Espinar A. Self-reported height and weight and prevalence of obesity. Study in a Spanish population. <i>Int. J. Obes. Relat. Metab. Disord.</i> 1993 Nov;17(11):663-7.                                                                          | 1990  |
| Spain        | Brug J, van Stralen MM, Te Velde SJ, Chinapaw MJM, De Bourdeaudhuij I, Lien N, Bere E, Maskini V, Singh AS, Maes L, Moreno L, Jan N, Kovacs E, Lobstein T, Manios Y. Differences in weight status and energy-balance related behaviors among schoolchildren across Europe: the ENERGY-project. <i>PLoS ONE.</i> 2012;7(4):e34742. | 2010  |
| Spain        | Buckland G, Salas-Salvadó J, Roure E, Bulló M, Serra-Majem L. Sociodemographic risk factors associated with metabolic syndrome in a Mediterranean population. <i>Public Health Nutr.</i> 2008 Dec;11(12):1372-8.                                                                                                                  | 2002  |
| Spain        | Buckland GG, Salas-Salvadó J, Serra-Majem L, Castell C, Cabré J, Salleras-Sanmartí L. Increase in metabolic syndrome as defined by ATPIII from 1992-1993 to 2002-2003 in a Mediterranean population. <i>Nutr. Rev.</i> 2009 May;67 Suppl 1:S117-125.                                                                              | 1992  |

| Country Name | Survey Name                                                                                                                                                                                                                                                                   | Years            |
|--------------|-------------------------------------------------------------------------------------------------------------------------------------------------------------------------------------------------------------------------------------------------------------------------------|------------------|
| Spain        | Gonzalez Barcala FJ, Pertega S, Bamonde L, Garnelo L, Perez Castro T, Sampedro M, Sanchez Lastres J, San Jose Gonzalez MA, Lopez Silvarrey A. Mediterranean diet and asthma in Spanish schoolchildren. <i>Pediatr Allergy Immunol.</i> 2010 Nov;21(7):1021-7.                 | 2006             |
| Spain        | González-Molero I, Rojo-Martínez G, Morcillo S, Gutierrez C, Rubio E, Pérez-Valero V, Esteva I, Ruiz de Adana MS, Almaraz MC, Colomo N, Olveira G, Soriguer F. Hypovitaminosis D and incidence of obesity: a prospective study. <i>Eur J Clin Nutr.</i> 2013 Jun;67(6):680-2. | 1996, 2002, 2005 |
| Spain        | Gutiérrez-Fisac JL, León-Muñoz LM, Regidor E, Banegas J, Rodríguez-Artalejo F. Trends in obesity and abdominal obesity in the older adult population of Spain (2000-2010). <i>Obes Facts.</i> 2013;6(1):1-8.                                                                  | 2000, 2008       |
| Spain        | Gutiérrez-Fisac JL, López E, Banegas JR, Graciani A, Rodríguez-Artalejo F. Prevalence of overweight and obesity in elderly people in Spain. <i>Obesity research.</i> 2004;12(4):710-5.                                                                                        | 2000             |
| Spain        | Huerta JM, Tormo MJ, Egea-Caparrós JM, Ortolá-Devesa JB, Navarro C. Accuracy of self-reported diabetes, hypertension and hyperlipidemia in the adult Spanish population. DINO study findings. <i>Rev Esp Cardiol.</i> 2009 Feb;62(2):143-52.                                  | 2000             |

| Country Name | Survey Name                                                                                                                                                                                                                                                                                          | Years |
|--------------|------------------------------------------------------------------------------------------------------------------------------------------------------------------------------------------------------------------------------------------------------------------------------------------------------|-------|
| Spain        | Khader YS, Batiha A, Jaddou H, Batiha Z, El-Khateeb M, Ajlouni K. Metabolic abnormalities associated with obesity in children and adolescents in Jordan. <i>Int J Pediatr Obes.</i> 2011 Aug;6(3-4):215–22.                                                                                          | 1993  |
| Spain        | Martín-López R, Pérez-Farinós N, Hernández-Barrera V, de Andres AL, Carrasco-Garrido P, Jiménez-García R. The association between excess weight and self-rated health and psychological distress in women in Spain. <i>Public Health Nutr.</i> 2011 Jul;14(7):1259–65.                               | 2006  |
| Spain        | Martínez-Vizcaíno V, Sánchez López M, Moya Martínez P, Solera Martínez M, Notario Pacheco B, Salcedo Aguilar F, Rodríguez-Artalejo F. Trends in excess weight and thinness among Spanish schoolchildren in the period 1992-2004: the Cuenca study. <i>Public Health Nutr.</i> 2009 Jul;12(7):1015–8. | 2004  |
| Spain        | Muniz J, Hervada J, Juane R, Lopez-Rodriguez I, Castro-Beiras A. Prevalence of diabetes mellitus in the population aged 40-69 years in Galicia, northwest Spain. <i>Diabetes Res. Clin. Pract.</i> 1995 Nov;30(2):137–42.                                                                            | 1992  |
| Spain        | Ottova V, Erhart M, Rajmil L, Dettendorf-Betz L, Ravens-Sieberer U. Overweight and its impact on the health-related quality of life in children and adolescents: results from the European KIDSCREEN survey. <i>Qual Life Res.</i> 2012 Feb;21(1):59–69.                                             | 2003  |

| Country Name | Survey Name                                                                                                                                                                                                                                                                       | Years                  |
|--------------|-----------------------------------------------------------------------------------------------------------------------------------------------------------------------------------------------------------------------------------------------------------------------------------|------------------------|
| Spain        | Regidor E, Banegas JR, Gutiérrez-Fisac JL, Domínguez V, Rodríguez-Artalejo F. Influence of childhood socioeconomic circumstances, height, and obesity on pulse pressure and systolic and diastolic blood pressure in older people. <i>J Hum Hypertens</i> . 2006 Jan;20(1):73–82. | 2000                   |
| Spain        | Rodríguez-Martín A, Novalbos Ruiz JP, Martínez Nieto JM, Escobar Jiménez L. Life-style factors associated with overweight and obesity among Spanish adults. <i>Nutr Hosp</i> . 2009 Apr;24(2):144–51.                                                                             | 2006                   |
| Spain        | Roskam A-JR, Kunst AE. The predictive value of different socio-economic indicators for overweight in nine European countries. <i>Public Health Nutr</i> . 2008 Dec;11(12):1256–66.                                                                                                | 2000                   |
| Spain        | Salcedo V, Gutiérrez-Fisac JL, Guallar-Castillón P, Rodríguez-Artalejo F. Trends in overweight and misperceived overweight in Spain from 1987 to 2007. <i>Int J Obes (Lond)</i> . 2010 Dec;34(12):1759–65.                                                                        | 1987, 1995, 2001, 2006 |
| Spain        | Serra-Majem L, Aranceta Bartrina J, Pérez-Rodrigo C, Ribas-Barba L, Delgado-Rubio A. Prevalence and determinants of obesity in Spanish children and young people. <i>Br. J. Nutr</i> . 2006 Aug;96 Suppl 1:S67–72.                                                                | 1998                   |

| Country Name | Survey Name                                                                                                                                                                                                                                                                                                                          | Years      |
|--------------|--------------------------------------------------------------------------------------------------------------------------------------------------------------------------------------------------------------------------------------------------------------------------------------------------------------------------------------|------------|
| Spain        | Serrano-Sanchez JA, Lera-Navarro A, Dorado-García C, González-Henriquez JJ, Sanchis-Moysi J. Contribution of individual and environmental factors to physical activity level among Spanish adults. PLoS ONE. 2012;7(6):e38693.                                                                                                       | 2004       |
| Spain        | Vázquez FL, Díaz O, Pomar C. Prevalence of overweight and obesity among preadolescent schoolchildren in Galicia, Spain. Child Care Health Dev. 2010 May;36(3):392–5.                                                                                                                                                                 | 2007       |
| Spain        | Yngve A, De Bourdeaudhuij I, Wolf A, Grjibovski A, Brug J, Due P, Ehrenblad B, Elmadfa I, Franchini B, Klepp K-I, Poortvliet E, Rasmussen M, Thorsdottir I, Perez Rodrigo C. Differences in prevalence of overweight and stunting in 11-year olds across Europe: The Pro Children Study. Eur J Public Health. 2008 Apr;18(2):126–30. | 2003       |
| Sri Lanka    | STEPS Noncommunicable Disease Risk Factors Survey                                                                                                                                                                                                                                                                                    | 2003, 2006 |
| Sri Lanka    | Demographic and Health Survey                                                                                                                                                                                                                                                                                                        | 2006       |
| Sri Lanka    | WHO STEPS Global School-Based Health Survey (GSHS)                                                                                                                                                                                                                                                                                   | 2008       |
| Sri Lanka    | Demographic and Health Survey (DHS)                                                                                                                                                                                                                                                                                                  | 1987       |

| Country Name     | Survey Name                                                                                                                                                                                                                                                                 | Years            |
|------------------|-----------------------------------------------------------------------------------------------------------------------------------------------------------------------------------------------------------------------------------------------------------------------------|------------------|
| <b>Sri Lanka</b> | Wijewardene K, Mohideen MR, Mendis S, Fernando DS, Kulathilaka T, Weerasekara D, Uluwitta P. Prevalence of hypertension, diabetes and obesity: baseline findings of a population based survey in four provinces in Sri Lanka. The Ceylon medical journal. 2005;50(2):62–70. | 2001             |
| <b>Sudan</b>     | Multiple Indicator Cluster Survey (MICS)                                                                                                                                                                                                                                    | 2000             |
| <b>Suriname</b>  | WHO STEPS Global School-Based Health Survey (GSHS)                                                                                                                                                                                                                          | 2009             |
| <b>Suriname</b>  | Multiple Indicator Cluster Survey (MICS)                                                                                                                                                                                                                                    | 2006, 2010       |
| <b>Swaziland</b> | Demographic and Health Survey (DHS)                                                                                                                                                                                                                                         | 2006             |
| <b>Swaziland</b> | Multiple Indicator Cluster Survey (MICS)                                                                                                                                                                                                                                    | 2000, 2010       |
| <b>Swaziland</b> | STEPS Noncommunicable Disease Risk Factors Survey                                                                                                                                                                                                                           | 2007             |
| <b>Sweden</b>    | Eurobarometer                                                                                                                                                                                                                                                               | 2005             |
| <b>Sweden</b>    | National Food Consumption Survey                                                                                                                                                                                                                                            | 1997, 2003, 2010 |
| <b>Sweden</b>    | Sweden National Survey of Public Health                                                                                                                                                                                                                                     | 2004-2012        |
| <b>Sweden</b>    | Survey of Health, Ageing and Retirement in Europe (SHARE)                                                                                                                                                                                                                   | 2004, 2007, 2011 |
| <b>Sweden</b>    | Health Behaviour in School-Aged Children                                                                                                                                                                                                                                    | 2001, 2005, 2009 |
| <b>Sweden</b>    | International Social Survey Programme (ISSP)                                                                                                                                                                                                                                | 2011             |
| <b>Sweden</b>    | World Health Survey (WHS)                                                                                                                                                                                                                                                   | 2003             |
| <b>Sweden</b>    | Alm A, Fåhraeus C, Wendt L-K, Koch G, Andersson-Gäre B, Birkhed D. Body adiposity status in teenagers and snacking habits in early childhood in relation to approximal caries at 15 years of age. Int J Paediatr Dent. 2008 May;18(3):189–96.                               | 2000             |



| Country Name | Survey Name                                                                                                                                                                                                                          | Years                  |
|--------------|--------------------------------------------------------------------------------------------------------------------------------------------------------------------------------------------------------------------------------------|------------------------|
| Sweden       | Djärv T, Wikman A, Nordenstedt H, Johar A, Lagergren J, Lagergren P. Physical activity, obesity and gastroesophageal reflux disease in the general population. <i>World J. Gastroenterol.</i> 2012 Jul 28;18(28):3710–4.             | 2008                   |
| Sweden       | Eklblom O, Oddsson K, Eklblom B. Prevalence and regional differences in overweight in 2001 and trends in BMI distribution in Swedish children from 1987 to 2001. <i>Scand J Public Health.</i> 2004;32(4):257–63.                    | 2001                   |
| Sweden       | Ekbäck G, Näslund I, Montgomery SM, Ordell S. Self-perceived oral health and obesity among 65 years old in two Swedish counties. <i>Swed Dent J.</i> 2010;34(4):207–15.                                                              | 2007                   |
| Sweden       | Gerdin EW, Angbratt M, Aronsson K, Eriksson E, Johansson I. Dental caries and body mass index by socio-economic status in Swedish children. <i>Community Dent Oral Epidemiol.</i> 2008 Oct;36(5):459–65.                             | 1995, 1996, 1998, 2001 |
| Sweden       | Hansson LM, Rasmussen F. Predictors of 10-year-olds' obesity stereotypes: A population-based study. <i>Int J Pediatr Obes.</i> 2010;5(1):25–33.                                                                                      | 2005                   |
| Sweden       | Hassing LB, Dahl AK, Pedersen NL, Johansson B. Overweight in midlife is related to lower cognitive function 30 years later: a prospective study with longitudinal assessments. <i>Dement Geriatr Cogn Disord.</i> 2010;29(6):543–52. | 1991                   |

| Country Name | Survey Name                                                                                                                                                                                                                                                                                                                   | Years      |
|--------------|-------------------------------------------------------------------------------------------------------------------------------------------------------------------------------------------------------------------------------------------------------------------------------------------------------------------------------|------------|
| Sweden       | Lager ACJ, Fossum B, Rörvall G, Bremberg SG. Children's overweight and obesity: local and national monitoring using electronic health records. <i>Scand J Public Health</i> . 2009 Mar;37(2):201-5.                                                                                                                           | 2004, 2005 |
| Sweden       | Lin Y, Wolk A, Håkansson N, Peñalvo JL, Lagergren J, Adlercreutz H, Lu Y. Validation of FFQ-based assessment of dietary lignans compared with serum enterolactone in Swedish women. <i>Br. J. Nutr.</i> 2013 May 28;109(10):1873-80.                                                                                          | 2003       |
| Sweden       | Lissner L, Mehlig K, Sjöberg A, Chaplin J, Niklasson A, Albertsson-Wikland K. Secular trends in weight, height and BMI in young Swedes: the "Grow up Gothenburg" studies. <i>Acta Paediatr.</i> 2013 Mar;102(3):314-7.                                                                                                        | 1992, 2008 |
| Sweden       | Löfdahl HE, Lane A, Lu Y, Lagergren P, Harvey RF, Blazeby JM, Lagergren J. Increased population prevalence of reflux and obesity in the United Kingdom compared with Sweden: a potential explanation for the difference in incidence of esophageal adenocarcinoma. <i>Eur J Gastroenterol Hepatol.</i> 2011 Feb;23(2):128-32. | 2008       |

| Country Name | Survey Name                                                                                                                                                                                                                                                                                                 | Years      |
|--------------|-------------------------------------------------------------------------------------------------------------------------------------------------------------------------------------------------------------------------------------------------------------------------------------------------------------|------------|
| Sweden       | Mårild S, Bondestam M, Bergström R, Ehnberg S, Hollsing A, Albertsson-Wikland K. Prevalence trends of obesity and overweight among 10-year-old children in western Sweden and relationship with parental body mass index. <i>Acta Paediatr.</i> 2004 Dec;93(12):1588–95.                                    | 2000       |
| Sweden       | Rasmussen F, Eriksson M, Nordquist T. Bias in height and weight reported by Swedish adolescents and relations to body dissatisfaction: the COMPASS study. <i>Eur J Clin Nutr.</i> 2007 Jul;61(7):870–6.                                                                                                     | 2000       |
| Sweden       | Sjöberg A, Moraeus L, Yngve A, Poortvliet E, Al-Ansari U, Lissner L. Overweight and obesity in a representative sample of schoolchildren - exploring the urban-rural gradient in Sweden. <i>Obes Rev.</i> 2011 May;12(5):305–14.                                                                            | 2008       |
| Sweden       | Sundquist J, Johansson S-E, Sundquist K. Levelling off of prevalence of obesity in the adult population of Sweden between 2000/01 and 2004/05. <i>BMC Public Health.</i> 2010;10:119.                                                                                                                       | 2000, 2004 |
| Sweden       | Uddenfeldt M, Janson C, Lampa E, Leander M, Norbäck D, Larsson L, Rask-Andersen A. High BMI is related to higher incidence of asthma, while a fish and fruit diet is related to a lower- Results from a long-term follow-up study of three age groups in Sweden. <i>Respir Med.</i> 2010 Jul;104(7):972–80. | 2003       |

| Country Name | Survey Name                                                                                                                                                                                                                                                                                                                                                                          | Years                        |
|--------------|--------------------------------------------------------------------------------------------------------------------------------------------------------------------------------------------------------------------------------------------------------------------------------------------------------------------------------------------------------------------------------------|------------------------------|
| Sweden       | Werner B, Bodin L. Obesity in Swedish schoolchildren is increasing in both prevalence and severity. <i>J Adolesc Health</i> . 2007 Dec;41(6):536–43.                                                                                                                                                                                                                                 | 1981                         |
| Sweden       | Wijnhoven TMA, van Raaij JMA, Spinelli A, Rito AI, Hovengen R, Kunesova M, Starc G, Rutter H, Sjöberg A, Petrauskiene A, O'Dwyer U, Petrova S, Farrugia Sant'angelo V, Wauters M, Yngve A, Rubana I-M, Breda J. WHO European Childhood Obesity Surveillance Initiative 2008: weight, height and body mass index in 6-9-year-old children. <i>Pediatr Obes</i> . 2013 Apr;8(2):79–97. | 2007                         |
| Sweden       | Yngve A, De Bourdeaudhuij I, Wolf A, Grijbovski A, Brug J, Due P, Ehrenblad B, Elmadfa I, Franchini B, Klepp K-I, Poortvliet E, Rasmussen M, Thorsdottir I, Perez Rodrigo C. Differences in prevalence of overweight and stunting in 11-year olds across Europe: The Pro Children Study. <i>Eur J Public Health</i> . 2008 Apr;18(2):126–30.                                         | 2003                         |
| Sweden       | Österberg T, Dey DK, Sundh V, Carlsson GE, Jansson J-O, Mellström D. Edentulism associated with obesity: a study of four national surveys of 16 416 Swedes aged 55&Acta Odontol. <i>Scand</i> . 2010 Nov;68(6):360–7.                                                                                                                                                                | 1980, 1988, 1996, 2002       |
| Switzerland  | Switzerland Health Survey                                                                                                                                                                                                                                                                                                                                                            | 1992, 1997, 2002, 2007, 2012 |
| Switzerland  | International Social Survey Programme (ISSP)                                                                                                                                                                                                                                                                                                                                         | 2011                         |
| Switzerland  | Health Behaviour in School-Aged Children                                                                                                                                                                                                                                                                                                                                             | 2001, 2005, 2009             |

| Country Name | Survey Name                                                                                                                                                                                                                                       | Years            |
|--------------|---------------------------------------------------------------------------------------------------------------------------------------------------------------------------------------------------------------------------------------------------|------------------|
| Switzerland  | Survey of Health, Ageing and Retirement in Europe (SHARE)                                                                                                                                                                                         | 2004, 2007, 2011 |
| Switzerland  | Chamay Weber C, Haller DM, Narring F. Is there a role for primary care physicians' screening of excessive weight and eating concerns in adolescence? J. Pediatr. 2010 Jul;157(1):32-5.                                                            | 2002             |
| Switzerland  | DeRoo LA, Vlastos AT, Mock P, Vlastos G, Morabia A. Comparison of women's breast cancer risk factors in Geneva, Switzerland and Shanghai, China. Prev Med. 2010 Dec;51(6):497-501.                                                                | 1996             |
| Switzerland  | Lasserre AM, Chiolero A, Cachat F, Paccaud F, Bovet P. Overweight in Swiss children and associations with children's and parents' characteristics. Obesity (Silver Spring). 2007 Dec;15(12):2912-9.                                               | 2005             |
| Switzerland  | Ottova V, Erhart M, Rajmil L, Dettenborn-Betz L, Ravens-Sieberer U. Overweight and its impact on the health-related quality of life in children and adolescents: results from the European KIDSCREEN survey. Qual Life Res. 2012 Feb;21(1):59-69. | 2003             |
| Syria        | WHO Multicountry Survey on Health and Health System Responsiveness                                                                                                                                                                                | 2000             |
| Syria        | STEPS Noncommunicable Disease Risk Factors Survey                                                                                                                                                                                                 | 2003             |
| Syria        | WHO STEPS Global School-Based Health Survey (GSHS)                                                                                                                                                                                                | 2010             |
| Syria        | Multiple Indicator Cluster Survey (MICS)                                                                                                                                                                                                          | 2006             |

| Country Name | Survey Name                                                                                                                                                                                       | Years            |
|--------------|---------------------------------------------------------------------------------------------------------------------------------------------------------------------------------------------------|------------------|
| Taiwan       | 1998 National Health Interview Survey of Drug Abuse                                                                                                                                               | 1998             |
| Taiwan       | International Social Survey Programme (ISSP)                                                                                                                                                      | 2012             |
| Taiwan       | National Health Interview Survey                                                                                                                                                                  | 2009             |
| Taiwan       | Chen L-J, Haase AM, Fox KR. Physical activity among adolescents in Taiwan. <i>Asia Pac J Clin Nutr.</i> 2007;16(2):354–61.                                                                        | 2001             |
| Taiwan       | Chen LJ, Fox KR, Haase A, Wang JM. Obesity, fitness and health in Taiwanese children and adolescents. <i>Eur J Clin Nutr.</i> 2006 Dec;60(12):1367–75.                                            | 1999, 2001       |
| Taiwan       | Chiu HC, Chang HY, Mau LW, Lee TK, Liu HW. Height, weight, and body mass index of elderly persons in Taiwan. <i>J. Gerontol. A Biol. Sci. Med. Sci.</i> 2000 Nov;55(11):M684–690.                 | 1989             |
| Taiwan       | Hu H-Y, Chou Y-J, Chou P, Chen L-K, Huang N. Association between obesity and injury among Taiwanese adults. <i>Int J Obes (Lond).</i> 2009 Aug;33(8):878–84.                                      | 2001             |
| Taiwan       | Huang K-C, Lee M-S, Lee S-D, Chang Y-H, Lin Y-C, Tu S-H, Pan W-H. Obesity in the elderly and its relationship with cardiovascular risk factors in Taiwan. <i>Obes. Res.</i> 2005 Jan;13(1):170–8. | 1999             |
| Taiwan       | Liou T-H, Huang Y-C, Chou P. Prevalence and secular trends in overweight and obese Taiwanese children and adolescents in 1991-2003. <i>Ann. Hum. Biol.</i> 2009 Apr;36(2):176–85.                 | 1991, 1997, 2003 |

| Country Name | Survey Name                                                                                                                                                                                                                                 | Years                        |
|--------------|---------------------------------------------------------------------------------------------------------------------------------------------------------------------------------------------------------------------------------------------|------------------------------|
| Taiwan       | Pu C, Chou Y-J. Health ratings for underweight, overweight and obese adolescents: disparities between adolescent's own report and the parent's report. <i>Asia Pac J Clin Nutr.</i> 2010;19(2):180-7.                                       | 2003                         |
| Tajikistan   | Micronutrient Status Survey in Tajikistan                                                                                                                                                                                                   | 2003                         |
| Tajikistan   | Demographic and Health Survey (DHS)                                                                                                                                                                                                         | 2012                         |
| Tajikistan   | Multiple Indicator Cluster Survey (MICS)                                                                                                                                                                                                    | 2005                         |
| Tajikistan   | Tajikistan Micronutrient Status Survey 2009                                                                                                                                                                                                 | 2009                         |
| Tanzania     | Demographic and Health Survey (DHS)                                                                                                                                                                                                         | 1991, 1996, 1999, 2004, 2009 |
| Tanzania     | STEPS Noncommunicable Disease Risk Factors Survey                                                                                                                                                                                           | 2011, 2012                   |
| Tanzania     | World Bank - Living Standards and Measurement Survey (LSMS)                                                                                                                                                                                 | 2004, 2010                   |
| Tanzania     | Core Welfare Indicators Questionnaire Survey (CWIQ)                                                                                                                                                                                         | 2006                         |
| Thailand     | Multiple Indicator Cluster Survey (MICS)                                                                                                                                                                                                    | 2005                         |
| Thailand     | Demographic and Health Survey (DHS)                                                                                                                                                                                                         | 1987                         |
| Thailand     | National Health Examination Survey (NHES)                                                                                                                                                                                                   | 2003                         |
| Thailand     | WHO STEPS Global School-Based Health Survey (GSHS)                                                                                                                                                                                          | 2008                         |
| Thailand     | Rerksuppaphol S, Rerksuppaphol L. Prevalence of overweight and obesity among school children in suburb Thailand defined by the International Obesity Task Force Standard. [corrected]. <i>J Med Assoc Thai.</i> 2010 Feb;93 Suppl 2:S27-31. | 2007                         |

| Country Name       | Survey Name                                                                                                                                                                                                                                                                  | Years      |
|--------------------|------------------------------------------------------------------------------------------------------------------------------------------------------------------------------------------------------------------------------------------------------------------------------|------------|
| <b>Thailand</b>    | Tangtrakulwanich B, Suwanno P. Epidemiology and risk factors of patellofemoral osteoarthritis in adults: a population-based study in southern Thailand. J Med Assoc Thai. 2012 Aug;95(8):1048–52.                                                                            | 2008       |
| <b>Thailand</b>    | The InterASIA Collaborative Group. Cardiovascular risk factor levels in urban and rural Thailand - The International Collaborative Study of Cardiovascular Disease in Asia (InterASIA). EUROPEAN JOURNAL OF CARDIOVASCULAR PREVENTION AND REHABILITATION. 2003;10(4):249–57. | 2000       |
| <b>Thailand</b>    | National Health Examination Survey                                                                                                                                                                                                                                           | 2008       |
| <b>The Bahamas</b> | Brathwaite N, Brathwaite A, Taylor M. The socio-economic determinants of obesity in adults in the Bahamas. West Indian Med J. 2011 Jul;60(4):434–41.                                                                                                                         | 2001       |
| <b>The Gambia</b>  | Multiple Indicator Cluster Survey (MICS)                                                                                                                                                                                                                                     | 2000, 2005 |
| <b>The Gambia</b>  | STEPS Noncommunicable Disease Risk Factors Survey                                                                                                                                                                                                                            | 2010       |
| <b>Timor-Leste</b> | Demographic and Health Survey (DHS)                                                                                                                                                                                                                                          | 2009       |
| <b>Timor-Leste</b> | Ramke J, Brian G. BMI among Timorese aged ? 40 years. Public Health Nutr. 2012 Nov;15(11):2118–23.                                                                                                                                                                           | 2009       |
| <b>Togo</b>        | STEPS Noncommunicable Disease Risk Factors Survey                                                                                                                                                                                                                            | 2010       |
| <b>Togo</b>        | Multiple Indicator Cluster Survey (MICS)                                                                                                                                                                                                                                     | 2006, 2010 |
| <b>Togo</b>        | Demographic and Health Survey (DHS)                                                                                                                                                                                                                                          | 1988, 1998 |



| Country Name               | Survey Name                                                                                                                                                                                                                                             | Years |
|----------------------------|---------------------------------------------------------------------------------------------------------------------------------------------------------------------------------------------------------------------------------------------------------|-------|
| <b>Tonga</b>               | STEPS Noncommunicable Disease Risk Factors Survey                                                                                                                                                                                                       | 2004  |
| <b>Tonga</b>               | WHO STEPS Global School-Based Health Survey (GSHS)                                                                                                                                                                                                      | 2010  |
| <b>Tonga</b>               | Smith BJ, Phongsavan P, Havea D, Halavatau V, Chey T. Body mass index, physical activity and dietary behaviours among adolescents in the Kingdom of Tonga. <i>Public Health Nutr.</i> 2007 Feb;10(2):137–44.                                            | 2000  |
| <b>Trinidad and Tobago</b> | Demographic and Health Survey (DHS)                                                                                                                                                                                                                     | 1987  |
| <b>Trinidad and Tobago</b> | STEPS Noncommunicable Disease Risk Factors Survey                                                                                                                                                                                                       | 2011  |
| <b>Trinidad and Tobago</b> | Multiple Indicator Cluster Survey (MICS)                                                                                                                                                                                                                | 2000  |
| <b>Trinidad and Tobago</b> | Mungrue K, Fyzul A, Ramroop S, Persad T, Asgarali A. Are teenagers at risk for developing cardiovascular disease in later life? <i>Int J Adolesc Med Health.</i> 2013;25(1):75–80.                                                                      | 2010  |
| <b>Tunisia</b>             | Demographic and Health Survey (DHS)                                                                                                                                                                                                                     | 1988  |
| <b>Tunisia</b>             | Aounallah-Skhiri H, Ben Romdhane H, Maire B, Elkhdim H, Eymard-Duvernay S, Delpuech F, Achour N. Health and behaviours of Tunisian school youth in an era of rapid epidemiological transition. <i>East. Mediterr. Health J.</i> 2009 Oct;15(5):1201–14. | 2005  |

| Country Name | Survey Name                                                                                                                                                                                                                                                 | Years            |
|--------------|-------------------------------------------------------------------------------------------------------------------------------------------------------------------------------------------------------------------------------------------------------------|------------------|
| Tunisia      | Aounallah-Skhiri H, Romdhane HB, Traissac P, Eymard-Duvernay S, Delpuech F, Achour N, Maire B. Nutritional status of Tunisian adolescents: associated gender, environmental and socio-economic factors. <i>Public Health Nutr.</i> 2008 Dec;11(12):1306–17. | 2004             |
| Turkey       | Eurobarometer                                                                                                                                                                                                                                               | 2005             |
| Turkey       | Turkey Prevalence, Awareness, Treatment and Control of Hypertension Study 2003                                                                                                                                                                              | 2003             |
| Turkey       | Turkey Chronic Diseases and Risk Factors Study 2011                                                                                                                                                                                                         | 2011             |
| Turkey       | Health Behaviour in School-Aged Children                                                                                                                                                                                                                    | 2005, 2009       |
| Turkey       | Turkey Health Interview Survey 2008                                                                                                                                                                                                                         | 2008             |
| Turkey       | Turkey Hypertension Prevalence Study 2012                                                                                                                                                                                                                   | 2012             |
| Turkey       | CREDIT Survey 2010                                                                                                                                                                                                                                          | 2010             |
| Turkey       | Demographic and Health Survey (DHS)                                                                                                                                                                                                                         | 1993, 1998, 2003 |
| Turkey       | WHO Multicountry Survey on Health and Health System Responsiveness                                                                                                                                                                                          | 2000             |
| Turkey       | International Social Survey Programme (ISSP)                                                                                                                                                                                                                | 2012             |
| Turkey       | Borici S, Agaoglu NB, Baykan OA, Agirbasli M. Blood pressure and anthropometric measurements in Albanian versus Turkish children and adolescents. <i>Acta Cardiol.</i> 2009 Dec;64(6):747–54.                                                               | 2007             |
| Turkey       | Oguz A, Temizhan A, Abaci A, Kozan O, Erol C, Ongen Z, Celik S. Obesity and abdominal obesity: an alarming challenge for cardio-metabolic risk in Turkish adults. <i>Anadolu Kardiyol Derg.</i> 2008 Dec;8(6):401–6.                                        | 2005             |

| Country Name         | Survey Name                                                                                                                                                                                                                                              | Years                        |
|----------------------|----------------------------------------------------------------------------------------------------------------------------------------------------------------------------------------------------------------------------------------------------------|------------------------------|
| Turkey               | Sahin I, Yildirim B, Cetin I, Etikan I, Ozturk B, Ozyurt H, Tasliyurt T. Prevalence of chronic kidney disease in the Black Sea Region, Turkey, and investigation of the related factors with chronic kidney disease. <i>Ren Fail.</i> 2009;31(10):920–7. | 2005                         |
| Turkey               | Simsek E, Akpinar S, Bahcebasi T, Senses DA, Kocabay K. The prevalence of overweight and obese children aged 6-17 years in the West Black Sea region of Turkey. <i>Int. J. Clin. Pract.</i> 2008 Jul;62(7):1033–8.                                       | 2005                         |
| Turkey               | Yuca SA, Yilmaz C, Cesur Y, Dogan M, Kaya A, Basaranoglu M. Prevalence of overweight and obesity in children and adolescents in eastern Turkey. <i>J Clin Res Pediatr Endocrinol.</i> 2010;2(4):159–63.                                                  | 2006                         |
| Turkmenistan         | Demographic and Health Survey                                                                                                                                                                                                                            | 2000                         |
| Uganda               | WHO STEPS Global School-Based Health Survey (GSHS)                                                                                                                                                                                                       | 2003                         |
| Uganda               | Demographic and Health Survey (DHS)                                                                                                                                                                                                                      | 1988, 1995, 2000, 2006, 2011 |
| Ukraine              | World Health Survey (WHS)                                                                                                                                                                                                                                | 2003                         |
| Ukraine              | Health Behaviour in School-Aged Children                                                                                                                                                                                                                 | 2001, 2005, 2009             |
| United Arab Emirates | WHO STEPS Global School-Based Health Survey (GSHS)                                                                                                                                                                                                       | 2005                         |
| United Arab Emirates | United Arab Emirates Health and Lifestyle Survey                                                                                                                                                                                                         | 2000                         |

| Country Name         | Survey Name                                                                                                                                                  | Years                                                                                                                  |
|----------------------|--------------------------------------------------------------------------------------------------------------------------------------------------------------|------------------------------------------------------------------------------------------------------------------------|
| United Arab Emirates | Al-Haddad FH, Little BB, Abdul Ghafoor AGM. Childhood obesity in United Arab Emirates schoolchildren: a national study. Ann. Hum. Biol. 2005 Feb;32(1):72-9. | 1998                                                                                                                   |
| United Arab Emirates | Malik M, Bakir A. Prevalence of overweight and obesity among children in the United Arab Emirates. Obes Rev. 2007 Jan;8(1):15-20.                            | 1998                                                                                                                   |
| United Kingdom       | Welsh Health Survey                                                                                                                                          | 1998, 2003, 2004, 2005, 2007, 2008, 2009, 2010, 2011, 2012                                                             |
| United Kingdom       | British Household Panel Survey                                                                                                                               | 2004, 2006                                                                                                             |
| United Kingdom       | Scottish Health Survey                                                                                                                                       | 1995, 1998, 2003, 2008, 2009, 2010, 2011, 2012                                                                         |
| United Kingdom       | International Social Survey Programme (ISSP)                                                                                                                 | 2011                                                                                                                   |
| United Kingdom       | United Kingdom Health Survey for England                                                                                                                     | 1991, 1993, 1994, 1995, 1996, 1997, 1998, 1999, 2000, 2001, 2002, 2003, 2004, 2005, 2006, 2007, 2008, 2009, 2010, 2011 |
| United Kingdom       | United Kingdom National Diet and Nutrition Survey 2000-2001                                                                                                  | 2000                                                                                                                   |
| United Kingdom       | United Kingdom Dietary and Nutritional Survey of British Adults 1986-1987                                                                                    | 1986                                                                                                                   |
| United Kingdom       | Northern Ireland Health Survey                                                                                                                               | 1997, 2005                                                                                                             |
| United Kingdom       | Eurobarometer                                                                                                                                                | 1989, 2005                                                                                                             |

| Country Name   | Survey Name                                                                                                                                                                                                                                                                           | Years            |
|----------------|---------------------------------------------------------------------------------------------------------------------------------------------------------------------------------------------------------------------------------------------------------------------------------------|------------------|
| United Kingdom | Health Behaviour in School-Aged Children                                                                                                                                                                                                                                              | 2001, 2005, 2009 |
| United Kingdom | Fisher L, Fraser J, Alexander C. Caregivers' inability to identify childhood adiposity: a cross-sectional survey of rural children and their caregivers' attitudes. <i>Aust J Rural Health.</i> 2006 Apr;14(2):56–61.                                                                 | 2002             |
| United Kingdom | Jebb SA, Rennie KL, Cole TJ. Prevalence of overweight and obesity among young people in Great Britain. <i>Public Health Nutr.</i> 2004 May;7(3):461–5.                                                                                                                                | 1997             |
| United Kingdom | Ottova V, Erhart M, Rajmil L, Dettenborn-Betz L, Ravens-Sieberer U. Overweight and its impact on the health-related quality of life in children and adolescents: results from the European KIDSCREEN survey. <i>Qual Life Res.</i> 2012 Feb;21(1):59–69.                              | 2003             |
| United Kingdom | Shiue I. Associated social factors of body mass index in adults and the very old in the UK. <i>Int. J. Cardiol.</i> 2013 Sep 20;168(1):543–5.                                                                                                                                         | 2009             |
| United Kingdom | Steele RM, van Sluijs EMF, Cassidy A, Griffin SJ, Ekelund U. Targeting sedentary time or moderate- and vigorous-intensity activity: independent relations with adiposity in a population-based sample of 10-y-old British children. <i>Am. J. Clin. Nutr.</i> 2009 Nov;90(5):1185–92. | 2007             |

| Country Name   | Survey Name                                                                                                                                                                                                                                                          | Years      |
|----------------|----------------------------------------------------------------------------------------------------------------------------------------------------------------------------------------------------------------------------------------------------------------------|------------|
| United Kingdom | Ul-Haq Z, Mackay DF, Fenwick E, Pell JP. Impact of metabolic comorbidity on the association between body mass index and health-related quality of life: a Scotland-wide cross-sectional study of 5,608 participants. BMC Public Health. 2012;12:143.                 | 2003       |
| United Kingdom | Wardle J, Williamson S, Johnson F, Edwards C. Depression in adolescent obesity: cultural moderators of the association between obesity and depressive symptoms. Int J Obes (Lond). 2006 Apr;30(4):634–43.                                                            | 1999       |
| United Kingdom | Watkins DC, Murray LJ, McCarron P, Boreham CAG, Cran GW, Young IS, McGartland C, Robson PJ, Savage JM. Ten-year trends for fatness in Northern Irish adolescents: the Young Hearts Projects--repeat cross-sectional study. Int J Obes (Lond). 2005 Jun;29(6):579–85. | 1989, 2000 |
| United Kingdom | Whelton H, Harrington J, Crowley E, Kelleher V, Cronin M, Perry JJ. Prevalence of overweight and obesity on the island of Ireland: results from the North South Survey of Children's Height, Weight and Body Mass Index, 2002. BMC Public Health. 2007;7:187.        | 2002       |
| United Kingdom | Yarnell JW, McCrum EE, Patterson CC, Skidmore P, Shields MD, McMahon J, Evans AE. Prevalence and awareness of excess weight in 13 and 14 year olds in Northern Ireland using recent international guidelines. Acta Paediatr. 2001 Dec;90(12):1435–9.                 | 1996       |

| Country Name   | Survey Name                                                                                                                                                                          | Years                                                                        |
|----------------|--------------------------------------------------------------------------------------------------------------------------------------------------------------------------------------|------------------------------------------------------------------------------|
| United Kingdom | Yarnell JW, Voyle GJ, Sweetnam PM, Milbank J, Richards CJ, Stephenson TP. Factors associated with urinary incontinence in women. J Epidemiol Community Health. 1982 Mar;36(1):58-63. | 1979                                                                         |
| United Kingdom | UK Health and Lifestyle Survey                                                                                                                                                       | 1984, 1991                                                                   |
| United States  | National Longitudinal Survey of Youth                                                                                                                                                | 1997-2011                                                                    |
| United States  | National Survey of Family Growth                                                                                                                                                     | 2006, 2007, 2008, 2009                                                       |
| United States  | National Longitudinal Survey of Adolescent Health                                                                                                                                    | 1994                                                                         |
| United States  | International Social Survey Programme (ISSP)                                                                                                                                         | 2012                                                                         |
| United States  | National Health Measurement Survey                                                                                                                                                   | 2006                                                                         |
| United States  | National Survey on Drug Abuse                                                                                                                                                        | 1995                                                                         |
| United States  | National Health and Nutrition Examination Survey (NHANES)                                                                                                                            | 1988, 1999, 2001, 2003, 2005, 2007, 2009, 2011                               |
| United States  | Behavioral Risk Factor Surveillance System (BRFSS)                                                                                                                                   | 1984-2012                                                                    |
| United States  | National Longitudinal Survey - Child/Young Adults                                                                                                                                    | 1986, 1988, 1990, 1992, 1994, 1996, 1998, 2000, 2002, 2004, 2006, 2008, 2010 |
| United States  | Health Behaviour in School-Aged Children                                                                                                                                             | 2001, 2005, 2009                                                             |
| United States  | National Health Interview Survey (NHIS)                                                                                                                                              | 1980-2012                                                                    |
| United States  | Pediatric Nutrition Surveillance                                                                                                                                                     | 2002-2011                                                                    |
| Uruguay        | International Social Survey Programme (ISSP)                                                                                                                                         | 2007                                                                         |
| Uzbekistan     | Multiple Indicator Cluster Survey (MICS)                                                                                                                                             | 2006                                                                         |

| Country Name                   | Survey Name                                                                                                                                                                                                   | Years                  |
|--------------------------------|---------------------------------------------------------------------------------------------------------------------------------------------------------------------------------------------------------------|------------------------|
| <b>Uzbekistan</b>              | Demographic and Health Survey (DHS)                                                                                                                                                                           | 1996, 2002             |
| <b>Vanuatu</b>                 | Multiple Indicator Cluster Survey (MICS)                                                                                                                                                                      | 2007                   |
| <b>Vanuatu</b>                 | STEPS Noncommunicable Disease Risk Factors Survey                                                                                                                                                             | 2011                   |
| <b>Vanuatu</b>                 | Vanuatu Non-communicable Disease Survey 1998                                                                                                                                                                  | 1998                   |
| <b>Vanuatu</b>                 | Taylor R, Jalaludin B, Levy S, Montaville B, Gee K, Sladden T. Prevalence of diabetes, hypertension and obesity at different levels of urbanisation in Vanuatu. Med. J. Aust. 1991 Jul 15;155(2):86–90.       | 1985                   |
| <b>Vietnam</b>                 | Vietnam STEPS NCD                                                                                                                                                                                             | 2009                   |
| <b>Vietnam</b>                 | Multiple Indicator Cluster Survey (MICS)                                                                                                                                                                      | 2000, 2010             |
| <b>Vietnam</b>                 | Ly KA, Ton TGN, Ngo QV, Vo TT, Fitzpatrick AL. Double burden: a cross-sectional survey assessing factors associated with underweight and overweight status in Danang, Vietnam. BMC Public Health. 2013;13:35. | 2010                   |
| <b>Vietnam</b>                 | Tuan NT, Tuong PD, Popkin BM. Body mass index (BMI) dynamics in Vietnam. Eur J Clin Nutr. 2008 Jan;62(1):78–86.                                                                                               | 2001                   |
| <b>Virgin Islands, British</b> | WHO STEPS Global School-Based Health Survey (GSHS)                                                                                                                                                            | 2009                   |
| <b>Yemen</b>                   | Demographic and Health Survey (DHS)                                                                                                                                                                           | 1991                   |
| <b>Zambia</b>                  | Demographic and Health Survey (DHS)                                                                                                                                                                           | 1992, 1996, 2001, 2007 |
| <b>Zambia</b>                  | World Health Survey (WHS)                                                                                                                                                                                     | 2003                   |
| <b>Zambia</b>                  | STEPS Noncommunicable Disease Risk Factors Survey                                                                                                                                                             | 2008                   |



| Country Name | Survey Name                                       | Years                              |
|--------------|---------------------------------------------------|------------------------------------|
| Zambia       | Living Conditions Monitoring Survey (LCMS)        | 1996, 1998, 2002, 2004, 2006, 2010 |
| Zambia       | Multiple Indicator Cluster Survey (MICS)          | 1999                               |
| Zimbabwe     | Multiple Indicator Cluster Survey (MICS)          | 2009                               |
| Zimbabwe     | STEPS Noncommunicable Disease Risk Factors Survey | 2005                               |
| Zimbabwe     | Demographic and Health Survey (DHS)               | 1988, 1994, 1999, 2005, 2010       |

**Webtable 8: List of sources reviewed but excluded from the current analysis**

| Country Name        | Survey                                                                                                                                                                                                                                            | Years      |
|---------------------|---------------------------------------------------------------------------------------------------------------------------------------------------------------------------------------------------------------------------------------------------|------------|
| Albania             | Shapo L, Pomerleau J, McKee M, Coker R, Ylli A. Body weight patterns in a country in transition: a population-based survey in Tirana City, Albania. <i>Public Health Nutr.</i> 2003 Aug;6(5):471–7.                                               | 2001       |
| Albania             | Spahija B, Qirjako G, Toçi E, Roshi E, Burazeri G. Socioeconomic and lifestyle determinants of obesity in a transitional southeast European population. <i>Med Arh.</i> 2012;66(3 Suppl 1):16–20.                                                 | 2007       |
| Antigua and Barbuda | WHO STEPS GSHS                                                                                                                                                                                                                                    | 2009       |
| Argentina           | De Sere day MS, Gonzalez C, Giorgini D, De Loredo L, Braguinsky J, Cobeñas C, Libman C, Tesone C. Prevalence of diabetes, obesity, hypertension and hyperlipidemia in the central area of Argentina. <i>Diabetes Metab.</i> 2004 Sep;30(4):335–9. | 1995       |
| Argentina           | Argentina National Survey of Risk Factors                                                                                                                                                                                                         | 2005, 2009 |
| Australia           | Dhaliwal SS, Howat P, Bejoy T, Welborn TA. Self-reported weight and height for evaluating obesity control programs. <i>Am J Health Behav.</i> 2010 Aug;34(4):489–99.                                                                              | 1989       |

|                   | Survey                                                                                                                                                                                                                                        | Years                  |
|-------------------|-----------------------------------------------------------------------------------------------------------------------------------------------------------------------------------------------------------------------------------------------|------------------------|
| <b>Australia</b>  | Flicker L, McCaul KA, Hankey GJ, Jamrozik K, Brown WJ, Byles JE, Almeida OP. Body mass index and survival in men and women aged 70 to 75. <i>J Am Geriatr Soc.</i> 2010 Feb;58(2):234–41.                                                     | 1996                   |
| <b>Australia</b>  | Sugiyama T, Merom D, Reeves M, Leslie E, Owen N. Habitual active transport moderates the association of TV viewing time with body mass index. <i>J Phys Act Health.</i> 2010 Jan;7(1):11–6.                                                   | 2003                   |
| <b>Australia</b>  | Van Zutphen M, Bell AC, Kremer PJ, Swinburn BA. Association between the family environment and television viewing in Australian children. <i>J Paediatr Child Health.</i> 2007 Jun;43(6):458–63.                                              | 2003                   |
| <b>Australia</b>  | WHO MONICA Databook                                                                                                                                                                                                                           | 1983, 1988, 1989, 1994 |
| <b>Austria</b>    | Kirchengast S, Steiner V. Sexual dimorphism in body composition, weight status and growth in prepubertal school children from rural areas of eastern Austria. <i>Coll Antropol.</i> 2001 Jun;25(1):21–30.                                     | 1998                   |
| <b>Austria</b>    | Österreichische Ernährungsbericht [Austrian Nutrition Report]                                                                                                                                                                                 | 2012                   |
| <b>Bahrain</b>    | Gharib NM, Shah P. Anthropometry and body composition of school children in Bahrain. <i>Ann Saudi Med.</i> 2009 Aug;29(4):258–69.                                                                                                             | 1999                   |
| <b>Bangladesh</b> | Hussain A, Vaaler S, Sayeed MA, Mahtab H, Ali SMK, Khan AKA. Type 2 diabetes and impaired fasting blood glucose in rural Bangladesh: a population-based study. <i>Eur J Public Health.</i> 2007 Jun;17(3):291–6.                              | 1999                   |
| <b>Bangladesh</b> | Shafique S, Akhter N, Stallkamp G, de Pee S, Panagides D, Bloem MW. Trends of under- and overweight among rural and urban poor women indicate the double burden of malnutrition in Bangladesh. <i>Int J Epidemiol.</i> 2007 Apr;36(2):449–57. | 2000                   |
| <b>Bangladesh</b> | STEPS Noncommunicable Disease Risk Factors Survey                                                                                                                                                                                             | 2002                   |
| <b>Bangladesh</b> | World Health Survey (WHS)                                                                                                                                                                                                                     | 2003                   |
| <b>Bangladesh</b> | Bangladesh Urban Health Survey                                                                                                                                                                                                                | 2006                   |
| <b>Barbados</b>   | Foster C, Rotimi C, Fraser H, Sundarum C, Liao Y, Gibson E, Holder Y, Hoyos M, Mellanson-King R. Hypertension, diabetes, and obesity in Barbados: findings from a recent population-based survey. <i>Ethn Dis.</i> 1993;3(4):404–12.          | 1990                   |
| <b>Barbados</b>   | Survey on Health, Well-Being and Aging in Latin America and the Caribbean (SABE)                                                                                                                                                              | 1999                   |

|                 | Survey                                                                                                                                                                                                                                                                        | Years                        |
|-----------------|-------------------------------------------------------------------------------------------------------------------------------------------------------------------------------------------------------------------------------------------------------------------------------|------------------------------|
| <b>Belgium</b>  | WHO MONICA Databook                                                                                                                                                                                                                                                           | 1983, 1985, 1987, 1988, 1990 |
| <b>Benin</b>    | STEPS Noncommunicable Disease Risk Factors Survey                                                                                                                                                                                                                             | 2007                         |
| <b>Bhutan</b>   | STEPS Noncommunicable Disease Risk Factors Survey                                                                                                                                                                                                                             | 2007                         |
| <b>Botswana</b> | WHO STEPS GSHS                                                                                                                                                                                                                                                                | 2005                         |
| <b>Brazil</b>   | Ramos de Marins VM, Varnier Almeida RM, Pereira RA, Barros MB. Factors associated with overweight and central body fat in the city of Rio de Janeiro: results of a two-stage random sampling survey. <i>Public Health</i> . 2001 May;115(3):236–42.                           | 1995                         |
| <b>Brazil</b>   | Survey on Health, Well-Being and Aging in Latin America and the Caribbean (SABE)                                                                                                                                                                                              | 1999                         |
| <b>Brazil</b>   | De Assis MAA, Rolland-Cachera MF, Grosseman S, de Vasconcelos FAG, Luna MEP, Calvo MCM, Barros MVG, Pires MMS, Bellisle F. Obesity, overweight and thinness in schoolchildren of the city of Florianópolis, Southern Brazil. <i>Eur J Clin Nutr</i> . 2005 Sep;59(9):1015–21. | 2002                         |
| <b>Brazil</b>   | De Assis MAA, Rolland-Cachera MF, de Vasconcelos FAG, Bellisle F, Conde W, Calvo MCM, Luna MEP, Ireton MJ, Grosseman S. Central adiposity in Brazilian schoolchildren aged 7-10 years. <i>Br. J. Nutr</i> . 2007 Apr;97(4):799–805.                                           | 2002                         |
| <b>Brazil</b>   | Reichert FF, Azevedo MR, Breier A, Gerage AM. Physical activity and prevalence of hypertension in a population-based sample of Brazilian adults and elderly. <i>Prev Med</i> . 2009 Sep;49(2-3):200–4.                                                                        | 2003                         |
| <b>Brazil</b>   | World Health Survey (WHS)                                                                                                                                                                                                                                                     | 2003                         |
| <b>Brazil</b>   | Guimarães JMN, de Souza Lopes C, Baima J, Sichieri R. Depression symptoms and hypothyroidism in a population-based study of middle-aged Brazilian women. <i>J Affect Disord</i> . 2009 Sep;117(1-2):120–3.                                                                    | 2004                         |
| <b>Brazil</b>   | Oliveira AM, Oliveira AC, Almeida MS, Oliveira N, Adan L. Influence of the family nucleus on obesity in children from northeastern Brazil: a cross-sectional study. <i>BMC Public Health</i> . 2007;7:235.                                                                    | 2004                         |
| <b>Brazil</b>   | Sichieri R, Dos Santos Barbosa F, Moura EC. Relationship between short stature and obesity in Brazil: a multilevel analysis. <i>Br. J. Nutr</i> . 2010 May;103(10):1534–8.                                                                                                    | 2006                         |

| Survey                          |                                                                                                                                                                                                                                                                      | Years      |
|---------------------------------|----------------------------------------------------------------------------------------------------------------------------------------------------------------------------------------------------------------------------------------------------------------------|------------|
| <b>Brazil</b>                   | De Andrade FB, de França Caldas A Jr, Kitoko PM. Relationship between oral health, nutrient intake and nutritional status in a sample of Brazilian elderly people. <i>Gerodontology</i> . 2009 Mar;26(1):40–5.                                                       | 2006       |
| <b>Brazil</b>                   | Duncan S, Duncan EK, Fernandes RA, Buonani C, Bastos KD-N, Segatto AFM, Codogno JS, Gomes IC, Freitas IF Jr. Modifiable risk factors for overweight and obesity in children and adolescents from São Paulo, Brazil. <i>BMC Public Health</i> . 2011;11:585.          | 2008       |
| <b>Brazil</b>                   | Santos Silva DA, Petroski EL, Peres MA. Is high body fat estimated by body mass index and waist circumference a predictor of hypertension in adults? A population-based study. <i>Nutr J</i> . 2012;11:112.                                                          | 2009       |
| <b>Brazil</b>                   | Machado EC, Silveira MF da, Silveira VMF da. Prevalence of weight-loss strategies and use of substances for weight-loss among adults: a population study. <i>Cad Saude Publica</i> . 2012 Aug;28(8):1439–49.                                                         | 2010       |
| <b>Brazil</b>                   | Moura EC, Claro RM. Estimates of obesity trends in Brazil, 2006–2009. <i>Int J Public Health</i> . 2012 Feb;57(1):127–33.                                                                                                                                            | 2006–2009  |
| <b>Burkina Faso</b>             | World Health Survey (WHS)                                                                                                                                                                                                                                            | 2003       |
| <b>Burkina Faso</b>             | Ouédraogo HZ, Fournet F, Martin-Prével Y, Gary J, Henry MC, Salem G. Socio-spatial disparities of obesity among adults in the urban setting of Ouagadougou, Burkina Faso. <i>Public Health Nutr</i> . 2008 Dec;11(12):1280–7.                                        | 2004       |
| <b>Cambodia</b>                 | King H, Keuky L, Seng S, Khun T, Roglic G, Pinget M. Diabetes and associated disorders in Cambodia: two epidemiological surveys. <i>Lancet</i> . 2005 Nov 5;366(9497):1633–9.                                                                                        | 2004       |
| <b>Cameroon</b>                 | Pasquet P, Temgoua LS, Melaman-Sego F, Froment A, Rikong-Adié H. Prevalence of overweight and obesity for urban adults in Cameroon. <i>Ann. Hum. Biol</i> . 2003 Oct;30(5):551–62.                                                                                   | 1998       |
| <b>Cameroon</b>                 | Kamadjeu RM, Edwards R, Atanga JS, Kiawi EC, Unwin N, Mbanya J-C. Anthropometry measures and prevalence of obesity in the urban adult population of Cameroon: an update from the Cameroon Burden of Diabetes Baseline Survey. <i>BMC Public Health</i> . 2006;6:228. | 2003       |
| <b>Cameroon</b>                 | STEPS Noncommunicable Disease Risk Factors Survey                                                                                                                                                                                                                    | 2003       |
| <b>Canada</b>                   | WHO MONICA Databook                                                                                                                                                                                                                                                  | 1985, 1995 |
| <b>Central African Republic</b> | STEPS Noncommunicable Disease Risk Factors Survey                                                                                                                                                                                                                    | 2010       |

|              | Survey                                                                                                                                                                                                                                                          | Years |
|--------------|-----------------------------------------------------------------------------------------------------------------------------------------------------------------------------------------------------------------------------------------------------------------|-------|
| <b>Chad</b>  | World Health Survey (WHS)                                                                                                                                                                                                                                       | 2003  |
| <b>Chad</b>  | STEPS Noncommunicable Disease Risk Factors Survey                                                                                                                                                                                                               | 2008  |
| <b>Chile</b> | Survey on Health, Well-Being and Aging in Latin America and the Caribbean (SABE)                                                                                                                                                                                | 1999  |
| <b>China</b> | Zheng W, Chow W-H, Yang G, Jin F, Rothman N, Blair A, Li H-L, Wen W, Ji B-T, Li Q, Shu X-O, Gao Y-T. The Shanghai Women's Health Study: rationale, study design, and baseline characteristics. <i>Am. J. Epidemiol.</i> 2005 Dec 1;162(11):1123–31.             | 1996  |
| <b>China</b> | Qin Y, Melse-Boonstra A, Pan X, Yuan B, Dai Y, Zhao J, Zimmermann MB, Kok FJ, Zhou M, Shi Z. Anemia in relation to body mass index and waist circumference among Chinese women. <i>Nutr J.</i> 2013;12:10.                                                      | 2002  |
| <b>China</b> | Lee S-A, Wen W, Xu WH, Zheng W, Li H, Yang G, Xiang Y-B, Shu X-O. Prevalence of obesity and correlations with lifestyle and dietary factors in Chinese men. <i>Obesity (Silver Spring)</i> . 2008 Jun;16(6):1440–7.                                             | 2002  |
| <b>China</b> | Sung RYT, Yu CCW, Choi KC, McManus A, Li AMC, Xu SLY, Chan D, Lo AFC, Chan JCN, Fok TF. Waist circumference and body mass index in Chinese children: cutoff values for predicting cardiovascular risk factors. <i>Int J Obes (Lond)</i> . 2007 Mar;31(3):550–8. | 2002  |
| <b>China</b> | Xie B, Chou C-P, Spruijt-Metz D, Reynolds K, Clark F, Palmer PH, Gallaher P, Sun P, Guo Q, Johnson CA. Socio-demographic and economic correlates of overweight status in Chinese adolescents. <i>Am J Health Behav.</i> 2007 Aug;31(4):339–52.                  | 2002  |
| <b>China</b> | World Health Survey (WHS)                                                                                                                                                                                                                                       | 2002  |
| <b>China</b> | Hou X, Jia W, Bao Y, Lu H, Jiang S, Zuo Y, Gu H, Xiang K. Risk factors for overweight and obesity, and changes in body mass index of Chinese adults in Shanghai. <i>BMC Public Health.</i> 2008;8:389.                                                          | 2003  |
| <b>China</b> | Li M, Dibley MJ, Sibbritt D, Yan H. An assessment of adolescent overweight and obesity in Xi'an City, China. <i>Int J Pediatr Obes.</i> 2006;1(1):50–8.                                                                                                         | 2004  |
| <b>China</b> | Tian H, Xie H, Song G, Zhang H, Hu G. Prevalence of overweight and obesity among 2.6 million rural Chinese adults. <i>Prev Med.</i> 2009 Jan;48(1):59–63.                                                                                                       | 2004  |
| <b>China</b> | Zhang X, Sun Z, Zhang X, Zheng L, Liu S, Xu C, Li J, Zhao F, Li J, Hu D, Sun Y. Prevalence and associated factors of overweight and obesity in a Chinese rural population. <i>Obesity (Silver Spring)</i> . 2008 Jan;16(1):168–71.                              | 2004  |

|                      | Survey                                                                                                                                                                                                                                                                                    | Years            |
|----------------------|-------------------------------------------------------------------------------------------------------------------------------------------------------------------------------------------------------------------------------------------------------------------------------------------|------------------|
| <b>China</b>         | Mak KK, Ho SY, Lo WS, Thomas NG, McManus AM, Lam TH. The use of waist-to-stature ratio to identify underweight and overweight in adolescents. <i>Int J Pediatr Obes.</i> 2010 Oct;5(5):390–5.                                                                                             | 2006             |
| <b>China</b>         | Xu Y-Q, Ji C-Y. Prevalence of the metabolic syndrome in secondary school adolescents in Beijing, China. <i>Acta Paediatr.</i> 2008 Mar;97(3):348–53.                                                                                                                                      | 2006             |
| <b>China</b>         | Mak K-K, Lai C-M. Assessment of dietary restraint: psychometric properties of the revised restraint scale in Hong Kong adolescents. <i>Int J Behav Med.</i> 2012 Jun;19(2):199–207.                                                                                                       | 2007             |
| <b>China</b>         | Ma Y-N, Chen T, Wang D, Liu M-M, He Q-C, Dong G-H. Prevalence of overweight and obesity among preschool children from six cities of northeast China. <i>Arch. Med. Res.</i> 2011 Oct;42(7):633–40.                                                                                        | 2008             |
| <b>China</b>         | Dong Q, Liu J-J, Zheng R-Z, Dong Y-H, Feng X-M, Li J, Huang F. Obesity and depressive symptoms in the elderly: a survey in the rural area of Chizhou, Anhui province. <i>Int J Geriatr Psychiatry.</i> 2013 Mar;28(3):227–32.                                                             | 2010             |
| <b>China</b>         | Xiao Y, Zhao N, Wang H, Zhang J, He Q, Su D, Zhao M, Wang L, Zhang X, Gong W, Hu R, Yu M, Ding G, Cong L, Ye Z. Association between socioeconomic status and obesity in a Chinese adult population. <i>BMC Public Health.</i> 2013;13:355.                                                | 2010             |
| <b>China</b>         | WHO MONICA Databook                                                                                                                                                                                                                                                                       | 1984, 1988, 1993 |
| <b>Colombia</b>      | McDonald CM, Baylin A, Arsenault JE, Mora-Plazas M, Villamor E. Overweight is more prevalent than stunting and is associated with socioeconomic status, maternal obesity, and a snacking dietary pattern in school children from Bogota, Colombia. <i>J. Nutr.</i> 2009 Feb;139(2):370–6. | 2006             |
| <b>Comoros</b>       | World Health Survey (WHS)                                                                                                                                                                                                                                                                 | 2003             |
| <b>Congo</b>         | World Health Survey (WHS)                                                                                                                                                                                                                                                                 | 2003             |
| <b>Congo</b>         | STEPS Noncommunicable Disease Risk Factors Survey                                                                                                                                                                                                                                         | 2004             |
| <b>Cote d'Ivoire</b> | World Health Survey (WHS)                                                                                                                                                                                                                                                                 | 2003             |
| <b>Cuba</b>          | Survey on Health, Well-Being and Aging in Latin America and the Caribbean (SABE)                                                                                                                                                                                                          | 1999             |

| Survey                    |                                                                                                                                                                                                                                                                                                                                                                                         | Years            |
|---------------------------|-----------------------------------------------------------------------------------------------------------------------------------------------------------------------------------------------------------------------------------------------------------------------------------------------------------------------------------------------------------------------------------------|------------------|
| <b>Czech Republic</b>     | Boylan S, Welch A, Pikhart H, Malyutina S, Pajak A, Kubinova R, Bragina O, Simonova G, Stepaniak U, Gilis-Januszevska A, Milla L, Peasey A, Marmot M, Bobak M. Dietary habits in three Central and Eastern European countries: the HAPIEE study. BMC Public Health. 2009;9:439.                                                                                                         | 2002             |
| <b>Czech Republic</b>     | WHO MONICA Databook                                                                                                                                                                                                                                                                                                                                                                     | 1985, 1988, 1992 |
| <b>Denmark</b>            | Ekelund U, Sardinha LB, Anderssen SA, Harro M, Franks PW, Brage S, Cooper AR, Andersen LB, Riddoch C, Froberg K. Associations between objectively assessed physical activity and indicators of body fatness in 9- to 10-y-old European children: a population-based study from 4 distinct regions in Europe (the European Youth Heart Study). Am. J. Clin. Nutr. 2004 Sep;80(3):584–90. | 2001             |
| <b>Denmark</b>            | Lund TB, Sandøe P, Lassen J. Attitudes to publicly funded obesity treatment and prevention. Obesity (Silver Spring). 2011 Aug;19(8):1580–5.                                                                                                                                                                                                                                             | 2010             |
| <b>Denmark</b>            | WHO MONICA Databook                                                                                                                                                                                                                                                                                                                                                                     | 1982, 1986, 1991 |
| <b>Dominica</b>           | WHO STEPS GSHS                                                                                                                                                                                                                                                                                                                                                                          | 2009             |
| <b>Dominican Republic</b> | World Health Survey (WHS)                                                                                                                                                                                                                                                                                                                                                               | 2003             |
| <b>Ecuador</b>            | World Health Survey (WHS)                                                                                                                                                                                                                                                                                                                                                               | 2003             |
| <b>Ethiopia</b>           | World Health Survey (WHS)                                                                                                                                                                                                                                                                                                                                                               | 2003             |
| <b>Ethiopia</b>           | STEPS Noncommunicable Disease Risk Factors Survey                                                                                                                                                                                                                                                                                                                                       | 2003, 2006       |
| <b>Fiji</b>               | King H, Zimmet P, Raper LR, Balkau B. Risk factors for diabetes in three Pacific populations. Am. J. Epidemiol. 1984 Mar;119(3):396–409.                                                                                                                                                                                                                                                | 1989             |
| <b>Finland</b>            | Shiri R, Solovieva S, Husgafvel-Pursiainen K, Taimela S, Saarikoski LA, Huupponen R, Viikari J, Raitakari OT, Viikari-Juntura E. The association between obesity and the prevalence of low back pain in young adults: the Cardiovascular Risk in Young Finns Study. Am. J. Epidemiol. 2008 May 1;167(9):1110–9.                                                                         | 1980, 1986       |
| <b>Finland</b>            | Vuorela N, Saha M-T, Salo MK. Change in prevalence of overweight and obesity in Finnish children - comparison between 1974 and 2001. Acta Paediatr. 2011 Jan;100(1):109–15.                                                                                                                                                                                                             | 1981, 1991       |
| <b>Finland</b>            | WHO MONICA Databook                                                                                                                                                                                                                                                                                                                                                                     | 1982, 1987, 1992 |

|                | Survey                                                                                                                                                                                                                                                                                                  | Years                                          |
|----------------|---------------------------------------------------------------------------------------------------------------------------------------------------------------------------------------------------------------------------------------------------------------------------------------------------------|------------------------------------------------|
| <b>Finland</b> | Ahti TM, Mäkivaara LA, Luukkaala T, Hakama M, Laurikka JO. Lifestyle factors and varicose veins: does cross-sectional design result in underestimate of the risk? <i>Phlebology</i> . 2010 Aug;25(4):201–6.                                                                                             | 1989, 1994                                     |
| <b>France</b>  | Thibault H, Contrand B, Saubusse E, Baine M, Maurice-Tison S. Risk factors for overweight and obesity in French adolescents: physical activity, sedentary behavior and parental characteristics. <i>Nutrition</i> . 2010 Feb;26(2):192–200.                                                             | 2004                                           |
| <b>France</b>  | WHO MONICA Databook                                                                                                                                                                                                                                                                                     | 1985, 1986, 1988, 1994, 1995                   |
| <b>France</b>  | Diouf I, Charles MA, Ducimetière P, Basdevant A, Eschwege E, Heude B. Evolution of obesity prevalence in France: an age-period-cohort analysis. <i>Epidemiology</i> . 2010 May;21(3):360–5.                                                                                                             | 1997, 2000, 2003, 2006                         |
| <b>Georgia</b> | World Health Survey (WHS)                                                                                                                                                                                                                                                                               | 2003                                           |
| <b>Germany</b> | Haenle MM, Brockmann SO, Kron M, Bertling U, Mason RA, Steinbach G, Boehm BO, Koenig W, Kern P, Piechotowski I, Kratzer W, EMIL-Study group. Overweight, physical activity, tobacco and alcohol consumption in a cross-sectional random sample of German adults. <i>BMC Public Health</i> . 2006;6:233. | 2002                                           |
| <b>Germany</b> | WHO MONICA Databook                                                                                                                                                                                                                                                                                     | 1982, 1983, 1984, 1988, 1989, 1991, 1993, 1994 |
| <b>Ghana</b>   | Ghana Urban Household Panel Survey                                                                                                                                                                                                                                                                      | 2003                                           |
| <b>Ghana</b>   | World Health Survey (WHS)                                                                                                                                                                                                                                                                               | 2003                                           |
| <b>Ghana</b>   | Cook-Huynh M, Ansong D, Steckelberg RC, Boakye I, Seligman K, Appiah L, Kumar N, Amuasi JH. Prevalence of hypertension and diabetes mellitus in adults from a rural community in Ghana. <i>Ethn Dis</i> . 2012;22(3):347–52.                                                                            | 2009                                           |
| <b>Ghana</b>   | Pereko KKA, Setorglo J, Owusu WB, Tiweh JM, Achampong EK. Overnutrition and associated factors among adults aged 20 years and above in fishing communities in the urban Cape Coast Metropolis, Ghana. <i>Public Health Nutr</i> . 2013 Apr;16(4):591–5.                                                 | 2010                                           |
| <b>Greece</b>  | Tokmakidis SP, Christodoulos AD, Mantzouranis NI. Validity of self-reported anthropometric values used to assess body mass index and estimate obesity in Greek school children. <i>J Adolesc Health</i> . 2007 Apr;40(4):305–10.                                                                        | 2004                                           |



| Survey         |                                                                                                                                                                                                                                                  | Years            |
|----------------|--------------------------------------------------------------------------------------------------------------------------------------------------------------------------------------------------------------------------------------------------|------------------|
| <b>Greece</b>  | Mavrakanas TA, Konsoula G, Patsonis I, Merkouris BP. Childhood obesity and elevated blood pressure in a rural population of northern Greece. Rural Remote Health. 2009 Jun;9(2):1150.                                                            | 2007             |
| <b>Grenada</b> | WHO STEPS GSHS                                                                                                                                                                                                                                   | 2008             |
| <b>Guyana</b>  | WHO STEPS GSHS                                                                                                                                                                                                                                   | 2004             |
| <b>Hungary</b> | Németh A, Bodzsár EB, Eiben OG. Comparisons of fatness indicators in Budapest children. Anthropol Anz. 1999 Dec;57(4):325–37.                                                                                                                    | 1994             |
| <b>Hungary</b> | WHO MONICA Databook                                                                                                                                                                                                                              | 1982, 1987       |
| <b>Iceland</b> | WHO MONICA Databook                                                                                                                                                                                                                              | 1983, 1988, 1993 |
| <b>India</b>   | Naidu AN, Rao NP. Body mass index: a measure of the nutritional status in Indian populations. Eur J Clin Nutr. 1994 Nov;48 Suppl 3:S131–140.                                                                                                     | 1988             |
| <b>India</b>   | Ramachandran A, Snehalatha C, Shyamala P, Vijay V, Viswanathan M. High prevalence of NIDDM and IGT in an elderly south Indian population with low rates of obesity. Diabetes Care. 1994 Oct;17(10):1190–2.                                       | 1991             |
| <b>India</b>   | Reddy KS, Prabhakaran D, Shah P, Shah B. Differences in body mass index and waist: hip ratios in North Indian rural and urban populations. Obes Rev. 2002 Aug;3(3):197–202.                                                                      | 1991             |
| <b>India</b>   | Bharati S, Pal M, Bhattacharya BN, Bharati P. Prevalence and causes of chronic energy deficiency and obesity in Indian women. Hum. Biol. 2007 Aug;79(4):395–412.                                                                                 | 1998             |
| <b>India</b>   | Ramachandran A, Snehalatha C, Vinitha R, Thayyil M, Kumar CKS, Sheeba L, Joseph S, Vijay V. Prevalence of overweight in urban Indian adolescent school children. Diabetes Res. Clin. Pract. 2002 Sep;57(3):185–90.                               | 1999             |
| <b>India</b>   | Venkatramana P, Reddy PC. Association of overall and abdominal obesity with coronary heart disease risk factors: comparison between urban and rural Indian men. Asia Pac J Clin Nutr. 2002;11(1):66–71.                                          | 1999             |
| <b>India</b>   | Krishnan A, Ekowati R, Baridalayne N, Kusumawardani N, Suhardi, Kapoor SK, Leowski J. Evaluation of community-based interventions for non-communicable diseases: experiences from India and Indonesia. Health Promot Int. 2011 Sep;26(3):276–89. | 2003             |
| <b>India</b>   | World Health Survey (WHS)                                                                                                                                                                                                                        | 2003             |

|           | Survey                                                                                                                                                                                                                                                                                                                                                    | Years      |
|-----------|-----------------------------------------------------------------------------------------------------------------------------------------------------------------------------------------------------------------------------------------------------------------------------------------------------------------------------------------------------------|------------|
| India     | Pandey RM, Gupta R, Misra A, Misra P, Singh V, Agrawal A, Dey S, Rao S, Menon VU, Kamalamma N, Devi KP, Revathi K, Sharma V. Determinants of urban-rural differences in cardiovascular risk factors in middle-aged women in India: a cross-sectional study. <i>Int. J. Cardiol.</i> 2013 Feb 20;163(2):157–62.                                            | 2004       |
| India     | Goyal RK, Shah VN, Saboo BD, Phatak SR, Shah NN, Gohel MC, Raval PB, Patel SS. Prevalence of overweight and obesity in Indian adolescent school going children: its relationship with socioeconomic status and associated lifestyle factors. <i>J Assoc Physicians India.</i> 2010 Mar;58:151–8.                                                          | 2006       |
| India     | Misra A, Shah P, Goel K, Hazra DK, Gupta R, Seth P, Tallikoti P, Mohan I, Bhargava R, Bajaj S, Madan J, Gulati S, Bhardwaj S, Sharma R, Gupta N, Pandey RM. The high burden of obesity and abdominal obesity in urban Indian schoolchildren: a multicentric study of 38,296 children. <i>Ann. Nutr. Metab.</i> 2011;58(3):203–11.                         | 2006       |
| India     | WHO STEPS GSHS                                                                                                                                                                                                                                                                                                                                            | 2007       |
| India     | Ghosh A. Rural-urban comparison in prevalence of overweight and obesity among children and adolescents of Asian Indian origin. <i>Asia Pac J Public Health.</i> 2011 Nov;23(6):928–35.                                                                                                                                                                    | 2008       |
| India     | Gupta R, Deedwania PC, Sharma K, Gupta A, Guptha S, Achari V, Asirvatham AJ, Bhansali A, Gupta B, Gupta S, Jali MV, Mahanta TG, Maheshwari A, Saboo B, Singh J, Gupta R. Association of educational, occupational and socioeconomic status with cardiovascular risk factors in Asian Indians: a cross-sectional study. <i>PLoS ONE.</i> 2012;7(8):e44098. | 2009       |
| India     | Bhagyalaxmi A, Atul T, Shikha J. Prevalence of risk factors of non-communicable diseases in a District of Gujarat, India. <i>J Health Popul Nutr.</i> 2013 Mar;31(1):78–85.                                                                                                                                                                               | 2010       |
| India     | India Noncommunicable Disease Risk Factors Survey                                                                                                                                                                                                                                                                                                         | 2003, 2007 |
| Indonesia | Soekirman, Hardinsyah, Jus'at I, Jahari AB. Regional study of nutritional status of urban primary schoolchildren. 2. West Jakarta and Bogor, Indonesia. <i>Food Nutr Bull.</i> 2002 Mar;23(1):31–40.                                                                                                                                                      | 1989       |
| Indonesia | WHO STEPS GSHS                                                                                                                                                                                                                                                                                                                                            | 2007       |
| Iran      | Soori H. Pattern of dietary behaviour and obesity in Ahwaz, Islamic Republic of Iran. <i>East. Mediterr. Health J.</i> 2001 Mar;7(1-2):163–70.                                                                                                                                                                                                            | 1988       |

|      | Survey                                                                                                                                                                                                                                                            | Years |
|------|-------------------------------------------------------------------------------------------------------------------------------------------------------------------------------------------------------------------------------------------------------------------|-------|
| Iran | Dorosty AR, Siassi F, Reilly JJ. Obesity in Iranian children. Arch. Dis. Child. 2002 Nov;87(5):388–391; discussion 388–391.                                                                                                                                       | 1995  |
| Iran | Bakhshi E, Eshraghian MR, Mohammad K, Foroushani AR, Zeraati H, Fotouhi A, Siassi F, Seifi B. Sociodemographic and smoking associated with obesity in adult women in Iran: results from the National Health Survey. J Public Health (Oxf). 2008 Dec;30(4):429–35. | 1999  |
| Iran | Kelishadi R, Gharipour M, Sadri GH, Tavasoli AA, Amani A. Cardiovascular disease risk factors, metabolic syndrome and obesity in an Iranian population. East. Mediterr. Health J. 2008 Oct;14(5):1070–9.                                                          | 2000  |
| Iran | Fazizi F, Esmailzadeh A, Mirmiran FP. Obesity and cardiovascular disease risk factors in Tehran adults: a population-based study. East. Mediterr. Health J. 2004 Nov;10(6):887–97.                                                                                | 2001  |
| Iran | Dastgiri S, Mahdavi R, TuTunchi H, Faramarzi E. Prevalence of obesity, food choices and socio-economic status: a cross-sectional study in the north-west of Iran. Public Health Nutr. 2006 Dec;9(8):996–1000.                                                     | 2003  |
| Iran | Esmailzadeh A, Mirmiran P, Azizi F. Comparative evaluation of anthropometric measures to predict cardiovascular risk factors in Tehranian adult women. Public Health Nutr. 2006 Feb;9(1):61–9.                                                                    | 2003  |
| Iran | Hajian-Tilaki KO, Heidari B. Prevalence of obesity, central obesity and the associated factors in urban population aged 20–70 years, in the north of Iran: a population-based study and regression approach. Obes Rev. 2007 Jan;8(1):3–10.                        | 2004  |
| Iran | Maddah M. Overweight and obesity among Iranian female adolescents in Rasht: more overweight in the lower social group. Public Health Nutr. 2007 May;10(5):450–3.                                                                                                  | 2004  |
| Iran | Azadbakht L, Esmailzadeh A. Dietary and non-dietary determinants of central adiposity among Tehrani women. Public Health Nutr. 2008 May;11(5):528–34.                                                                                                             | 2005  |
| Iran | Maddah M, Nikooyeh B. Factors associated with overweight in children in Rasht, Iran: gender, maternal education, skipping breakfast and parental obesity. Public Health Nutr. 2010 Feb;13(2):196–200.                                                             | 2006  |
| Iran | Maddah M, Nikooyeh B. Obesity among Iranian adolescent girls: location of residence and parental obesity. J Health Popul Nutr. 2010 Feb;28(1):61–6.                                                                                                               | 2006  |

|                | Survey                                                                                                                                                                                                                                                                | Years                        |
|----------------|-----------------------------------------------------------------------------------------------------------------------------------------------------------------------------------------------------------------------------------------------------------------------|------------------------------|
| <b>Iran</b>    | Shirani S, Heidari K, Sabzghabaee AM, Mirmoghtadaee P, Hoseini L, Aalifar H, Fadaei H, Esnaashari H, Soltani R. The modifiable noncommunicable risk factors among an Iranian population. <i>Southeast Asian J. Trop. Med. Public Health</i> . 2012 Sep;43(5):1227–32. | 2007                         |
| <b>Iran</b>    | STEPS Noncommunicable Disease Risk Factors Survey                                                                                                                                                                                                                     | 2008                         |
| <b>Iran</b>    | Khazaie H, Najafi F, Rezaie L, Tahmasian M, Sepehry AA, Herth FJF. Prevalence of symptoms and risk of obstructive sleep apnea syndrome in the general population. <i>Arch Iran Med</i> . 2011 Sep;14(5):335–8.                                                        | 2008                         |
| <b>Iraq</b>    | STEPS Noncommunicable Disease Risk Factors Survey                                                                                                                                                                                                                     | 2003                         |
| <b>Ireland</b> | McMaster C, Cullen L, Raymond N. Overweight and obesity in Irish primary schools: retrospective cohort study. <i>Child Care Health Dev</i> . 2005 Sep;31(5):499–506.                                                                                                  | 2001                         |
| <b>Israel</b>  | WHO MONICA Databook                                                                                                                                                                                                                                                   | 1985                         |
| <b>Italy</b>   | Barba G, Troiano E, Russo P, Strazzullo P, Siani A. Body mass, fat distribution and blood pressure in Southern Italian children: results of the ARCA project. <i>Nutr Metab Cardiovasc Dis</i> . 2006 May;16(4):239–48.                                               | 2003                         |
| <b>Italy</b>   | Vidal E, Carlin E, Driul D, Tomat M, Tenore A. A comparison study of the prevalence of overweight and obese Italian preschool children using different reference standards. <i>Eur. J. Pediatr</i> . 2006 Oct;165(10):696–700.                                        | 2003                         |
| <b>Italy</b>   | WHO MONICA Databook                                                                                                                                                                                                                                                   | 1982, 1986, 1989, 1993, 1994 |
| <b>Japan</b>   | Sekine M, Yamagami T, Hamanishi S, Kagamimori S. Accuracy of the estimated prevalence of childhood obesity from height and weight values reported by parents: results of the Toyama Birth Cohort study. <i>J Epidemiol</i> . 2002 Jan;12(1):9–13.                     | 1999                         |
| <b>Japan</b>   | Aoyagi K, Kusano Y, Takamura N, Abe Y, Osaki M, Une H. Obesity and cardiovascular risk factors among men and women aged 40 years and older in a rural area of Japan. <i>J Physiol Anthropol</i> . 2006 Nov;25(6):371–5.                                               | 2004                         |
| <b>Japan</b>   | Yoshinaga M, Shimago A, Koriyama C, Nomura Y, Miyata K, Hashiguchi J, Arima K. Rapid increase in the prevalence of obesity in elementary school children. <i>Int. J. Obes. Relat. Metab. Disord</i> . 2004 Apr;28(4):494–9.                                           | 1989-2002                    |
| <b>Japan</b>   | Kouda K, Nakamura H, Tokunaga R, Takeuchi H. Trends in levels of cholesterol in Japanese children from 1993 through 2001. <i>J Epidemiol</i> . 2004 May;14(3):78–82.                                                                                                  | 1993-2001                    |

|                   | Survey                                                                                                                                                                                                                                                                       | Years            |
|-------------------|------------------------------------------------------------------------------------------------------------------------------------------------------------------------------------------------------------------------------------------------------------------------------|------------------|
| <b>Jordan</b>     | Ghalayini IF, Al-Ghazo MA, Al-Azab R, Bani-Hani I, Matani YS, Barham A-E, Harfeil MNA, Haddad Y. Erectile dysfunction in a Mediterranean country: results of an epidemiological survey of a representative sample of men. <i>Int. J. Impot. Res.</i> 2010 Jun;22(3):196–203. | 2007             |
| <b>Jordan</b>     | WHO STEPS GSHS                                                                                                                                                                                                                                                               | 2007             |
| <b>Kazakhstan</b> | World Health Survey (WHS)                                                                                                                                                                                                                                                    | 2003             |
| <b>Kenya</b>      | WHO STEPS GSHS                                                                                                                                                                                                                                                               | 2003             |
| <b>Kenya</b>      | World Health Survey (WHS)                                                                                                                                                                                                                                                    | 2004             |
| <b>Kiribati</b>   | King H, Taylor R, Zimmet P, Pargeter K, Raper LR, Beriki T, Tekanene J. Non-insulin-dependent diabetes (NIDDM) in a newly independent Pacific nation: the Republic of Kiribati. <i>Diabetes Care.</i> 1984 Oct;7(5):409–15.                                                  | 1981             |
| <b>Kiribati</b>   | King H, Zimmet P, Raper LR, Balkau B. Risk factors for diabetes in three Pacific populations. <i>Am. J. Epidemiol.</i> 1984 Mar;119(3):396–409.                                                                                                                              | 1981             |
| <b>Laos</b>       | World Health Survey (WHS)                                                                                                                                                                                                                                                    | 2003             |
| <b>Lebanon</b>    | Jabre P, Sikias P, Khater-Menassa B, Baddoura R, Awada H. Overweight children in Beirut: prevalence estimates and characteristics. <i>Child Care Health Dev.</i> 2005 Mar;31(2):159–65.                                                                                      | 2000             |
| <b>Lebanon</b>    | WHO STEPS GSHS                                                                                                                                                                                                                                                               | 2005             |
| <b>Lithuania</b>  | WHO MONICA Databook                                                                                                                                                                                                                                                          | 1983, 1986, 1992 |
| <b>Lithuania</b>  | Tutkuvienė J. Body mass index, prevalence of overweight and obesity in Lithuanian children and adolescents, 1985-2002. <i>Coll Antropol.</i> 2007 Mar;31(1):109–21.                                                                                                          | 1985, 2000, 2002 |
| <b>Lithuania</b>  | Jakimaviciene EM, Tutkuvienė J. Trends in body mass index, prevalence of overweight and obesity in preschool Lithuanian children, 1986-2006. <i>Coll Antropol.</i> 2007 Mar;31(1):79–88.                                                                                     | 1986, 2003       |
| <b>Macedonia</b>  | WHO MONICA Databook                                                                                                                                                                                                                                                          | 1984, 1988, 1994 |
| <b>Madagascar</b> | Mauny F, Viel JF, Roubaux F, Ratsimandresy R, Sellin B. Blood pressure, body mass index and socio-economic status in the urban population of Antananarivo (Madagascar). <i>Ann Trop Med Parasitol.</i> 2003 Sep;97(6):645–54.                                                | 1997             |
| <b>Malawi</b>     | World Health Survey (WHS)                                                                                                                                                                                                                                                    | 2003             |
| <b>Malaysia</b>   | Tee E-S, Khor S-C, Ooi H-E, Young S-I, Zakayah O, Zulkafli H. Regional study of nutritional status of urban primary schoolchildren. 3. Kuala Lumpur, Malaysia. <i>Food Nutr Bull.</i> 2002 Mar;23(1):41–7.                                                                   | 1989             |

|            | Survey                                                                                                                                                                                                                                | Years |
|------------|---------------------------------------------------------------------------------------------------------------------------------------------------------------------------------------------------------------------------------------|-------|
| Malaysia   | World Health Survey (WHS)                                                                                                                                                                                                             | 2003  |
| Malaysia   | Muhammad NA, Omar K, Shah SA, Muthupalaniappen LAP, Arshad F. Parental perception of their children's weight status, and its association with their nutrition and obesity knowledge. <i>Asia Pac J Clin Nutr.</i> 2008;17(4):597–602. | 2005  |
| Malaysia   | Jan Mohamed HJB, Mitra AK, Zainuddin LRM, Leng SK, Wan Muda WM. Women are at a higher risk of metabolic syndrome in rural Malaysia. <i>Women Health.</i> 2013;53(4):335–48.                                                           | 2008  |
| Maldives   | STEPS Noncommunicable Disease Risk Factors Survey                                                                                                                                                                                     | 2004  |
| Mali       | Torheim LE, Ouattara F, Diarra MM, Thiam FD, Barikmo I, Hatløy A, Oshaug A. Nutrient adequacy and dietary diversity in rural Mali: association and determinants. <i>European journal of clinical nutrition.</i> 2004;58(4):594–604.   | 1997  |
| Mali       | Torheim LE, Granli GI, Sidibé CS, Traoré AK, Oshaug A. Women's iodine status and its determinants in an iodine-deficient area in the Kayes region, Mali. <i>Public health nutrition.</i> 2005;8(4):387–94.                            | 1999  |
| Mali       | World Health Survey (WHS)                                                                                                                                                                                                             | 2003  |
| Malta      | WHO MONICA Databook                                                                                                                                                                                                                   | 1984  |
| Mauritania | World Health Survey (WHS)                                                                                                                                                                                                             | 2003  |
| Mauritania | STEPS Noncommunicable Disease Risk Factors Survey                                                                                                                                                                                     | 2006  |
| Mauritius  | World Health Survey (WHS)                                                                                                                                                                                                             | 2003  |
| Mexico     | Arroyo P, Loria A, Fernández V, Flegal KM, Kuri-Morales P, Olaiz G, Tapia-Conyer R. Prevalence of pre-obesity and obesity in urban adult Mexicans in comparison with other large surveys. <i>Obes. Res.</i> 2000 Mar;8(2):179–85.     | 1992  |
| Mexico     | Survey on Health, Well-Being and Aging in Latin America and the Caribbean (SABE)                                                                                                                                                      | 1999  |
| Mexico     | World Health Survey (WHS)                                                                                                                                                                                                             | 2003  |
| Morocco    | World Health Survey (WHS)                                                                                                                                                                                                             | 2003  |
| Morocco    | WHO STEPS GSHS                                                                                                                                                                                                                        | 2006  |
| Myanmar    | STEPS Noncommunicable Disease Risk Factors Survey                                                                                                                                                                                     | 2003  |
| Myanmar    | World Health Survey (WHS)                                                                                                                                                                                                             | 2003  |
| Namibia    | World Health Survey (WHS)                                                                                                                                                                                                             | 2003  |
| Nepal      | STEPS Noncommunicable Disease Risk Factors Survey                                                                                                                                                                                     | 2003  |

|                    | Survey                                                                                                                                                                                                                          | Years                              |
|--------------------|---------------------------------------------------------------------------------------------------------------------------------------------------------------------------------------------------------------------------------|------------------------------------|
| <b>Nepal</b>       | World Health Survey (WHS)                                                                                                                                                                                                       | 2003                               |
| <b>New Zealand</b> | Williams S. Body Mass Index reference curves derived from a New Zealand birth cohort. <i>N. Z. Med. J.</i> 2000 Jul 28;113(1114):308–11.                                                                                        | 1981, 1983, 1985, 1987, 1990, 1993 |
| <b>New Zealand</b> | WHO MONICA Databook                                                                                                                                                                                                             | 1982, 1993                         |
| <b>Nicaragua</b>   | Iniciativa Centroamericana de Diabetes (CAMDI)                                                                                                                                                                                  | 2003                               |
| <b>Nigeria</b>     | Ezeoma IT, Abioye-Kuteyi EA, Oladeji AO. Body build and blood pressure in a rural Nigerian community. <i>Niger Postgrad Med J.</i> 2001 Sep;8(3):140–4.                                                                         | 1995                               |
| <b>Nigeria</b>     | STEPS Noncommunicable Disease Risk Factors Survey                                                                                                                                                                               | 2003                               |
| <b>Nigeria</b>     | Goon DT, Toriola AL, Shaw BS. Screening for body-weight disorders in Nigerian children using contrasting definitions. <i>Obes Rev.</i> 2010 Jul;11(7):508–15.                                                                   | 2005                               |
| <b>Nigeria</b>     | Famodu AA, Awodu OA. Anthropometric indices as determinants of haemorheological cardiovascular disease risk factors in Nigerian adults living in a semi-urban community. <i>Clin. Hemorheol. Microcirc.</i> 2009;43(4):335–44.  | 2006                               |
| <b>Nigeria</b>     | Nwizu SE, Njokanma OF, Okoromah CA, David NA. Relationship between bioelectrical impedance analysis and body mass index in adolescent urban Nigerians. <i>West Afr J Med.</i> 2011 Apr;30(2):99–103.                            | 2006                               |
| <b>Nigeria</b>     | Iliyasu Z, Abubakar IS, Abubakar S, Lawan UM, Gajida AU, Jibo AM. A survey of weight perception and social desirability of obesity among adults in Kano Metropolis, Northern Nigeria. <i>Niger J Med.</i> 2013 Jun;22(2):101–8. | 2010                               |
| <b>Nigeria</b>     | Senbanjo IO, Oshikoya KA, Olutekunbi OA, Njokanma OF. Body fat distribution of children and adolescents in Abeokuta, Southwest Nigeria. <i>Am. J. Phys. Anthropol.</i> 2013 Apr;150(4):647–54.                                  | 2010                               |
| <b>North Korea</b> | STEPS Noncommunicable Disease Risk Factors Survey                                                                                                                                                                               | 2005, 2007                         |
| <b>Norway</b>      | Kvaavik E, Tell GS, Klepp K-I. Predictors and tracking of body mass index from adolescence into adulthood: follow-up of 18 to 20 years in the Oslo Youth Study. <i>Arch Pediatr Adolesc Med.</i> 2003 Dec;157(12):1212–8.       | 1999                               |

| Survey                  |                                                                                                                                                                                                                                                                                                                                                                                                | Years      |
|-------------------------|------------------------------------------------------------------------------------------------------------------------------------------------------------------------------------------------------------------------------------------------------------------------------------------------------------------------------------------------------------------------------------------------|------------|
| <b>Norway</b>           | Ekelund U, Sardinha LB, Anderssen SA, Harro M, Franks PW, Brage S, Cooper AR, Andersen LB, Riddoch C, Froberg K. Associations between objectively assessed physical activity and indicators of body fatness in 9- to 10-y-old European children: a population-based study from 4 distinct regions in Europe (the European Youth Heart Study). <i>Am. J. Clin. Nutr.</i> 2004 Sep;80(3):584–90. | 2001       |
| <b>Oman</b>             | WHO STEPS GSHS                                                                                                                                                                                                                                                                                                                                                                                 | 2005, 2010 |
| <b>Pakistan</b>         | World Health Survey (WHS)                                                                                                                                                                                                                                                                                                                                                                      | 2003       |
| <b>Palestine</b>        | Abdul-Rahim HF, Abu-Rmeileh NM, Husseini A, Holmboe-Ottesen G, Jervell J, Bjertness E. Obesity and selected co-morbidities in an urban Palestinian population. <i>Int. J. Obes. Relat. Metab. Disord.</i> 2001 Nov;25(11):1736–40.                                                                                                                                                             | 1998       |
| <b>Palestine</b>        | Abdul-Rahim HF, Husseini A, Bjertness E, Giacaman R, Gordon NH, Jervell J. The metabolic syndrome in the West Bank population: an urban-rural comparison. <i>Diabetes Care.</i> 2001 Feb;24(2):275–9.                                                                                                                                                                                          | 1996, 1998 |
| <b>Papua New Guinea</b> | King H, Collins V, King LF, Finch C, Alpers MP. Blood pressure, hypertension and other cardiovascular risk factors in six communities in Papua New Guinea, 1985-1986. <i>P N G Med J.</i> 1994 Jun;37(2):100–9.                                                                                                                                                                                | 1985       |
| <b>Paraguay</b>         | World Health Survey (WHS)                                                                                                                                                                                                                                                                                                                                                                      | 2003       |
| <b>Philippines</b>      | WHO STEPS GSHS                                                                                                                                                                                                                                                                                                                                                                                 | 2003       |
| <b>Philippines</b>      | World Health Survey (WHS)                                                                                                                                                                                                                                                                                                                                                                      | 2003       |
| <b>Philippines</b>      | Carba DB, Bas IN, Gultiano SA, Lee NR, Adair LS. Waist circumference and the risk of hypertension and prediabetes among Filipino women. <i>Eur J Nutr.</i> 2013 Mar;52(2):825–32.                                                                                                                                                                                                              | 2005       |
| <b>Poland</b>           | Boylan S, Welch A, Pikhart H, Maljutina S, Pajak A, Kubinova R, Bragina O, Simonova G, Stepaniak U, Gilis-Januszewska A, Milla L, Peasey A, Marmot M, Bobak M. Dietary habits in three Central and Eastern European countries: the HAPIEE study. <i>BMC Public Health.</i> 2009;9:439.                                                                                                         | 2002       |
| <b>Poland</b>           | Mikołajczyk J, Piotrowska E, Biernat J, Wyka J, Zecha-Czajkowska A. [Assessment of risk factors of metabolic syndrome in girls and boys from south-west area of Poland]. <i>Rocz Panstw Zakl Hig.</i> 2011;62(1):83–92.                                                                                                                                                                        | 2003       |



|                 | Survey                                                                                                                                                                                                                                                                                 | Years                              |
|-----------------|----------------------------------------------------------------------------------------------------------------------------------------------------------------------------------------------------------------------------------------------------------------------------------------|------------------------------------|
| <b>Poland</b>   | Ostrowska-Nawarycz L, Nawarycz T. Prevalence of excessive body weight and high blood pressure in children and adolescents in the city of ?ód?. <i>Kardiol Pol.</i> 2007 Sep;65(9):1079–1087; discussion 1088–1089.                                                                     | 2005                               |
| <b>Poland</b>   | WHO MONICA Databook                                                                                                                                                                                                                                                                    | 1983, 1987, 1988, 1992, 1993       |
| <b>Portugal</b> | Ramos E, Barros H. Family and school determinants of overweight in 13-year-old Portuguese adolescents. <i>Acta Paediatr.</i> 2007 Feb;96(2):281–6.                                                                                                                                     | 2003                               |
| <b>Portugal</b> | Ribeiro J, Santos P, Duarte J, Mota J. Association between overweight and early sexual maturation in Portuguese boys and girls. <i>Ann. Hum. Biol.</i> 2006 Feb;33(1):55–63.                                                                                                           | 2003                               |
| <b>Portugal</b> | Mota J, Fidalgo F, Silva R, Ribeiro JC, Santos R, Carvalho J, Santos MP. Relationships between physical activity, obesity and meal frequency in adolescents. <i>Ann. Hum. Biol.</i> 2008 Feb;35(1):1–10.                                                                               | 2005                               |
| <b>Portugal</b> | Pereira M, Lunet N, Paulo C, Severo M, Azevedo A, Barros H. Incidence of hypertension in a prospective cohort study of adults from Porto, Portugal. <i>BMC Cardiovasc Disord.</i> 2012;12:114.                                                                                         | 2005                               |
| <b>Portugal</b> | Portuguese National Nutritional Surveillance System (COSI Portugal)                                                                                                                                                                                                                    | 2007                               |
| <b>Qatar</b>    | Bener A, Al-Mahdi HS, Ali AI, Al-Nufal M, Vachhani PJ, Tewfik I. Obesity and low vision as a result of excessive Internet use and television viewing. <i>Int J Food Sci Nutr.</i> 2011 Feb;62(1):60–2.                                                                                 | 2009                               |
| <b>Romania</b>  | WHO MONICA Databook                                                                                                                                                                                                                                                                    | 1986                               |
| <b>Romania</b>  | Hurjui DM, Nit,a( O, Graur LI, Mihalache L, Popescu DS, Hut,anas,u IC, Ungureanu D, Graur M. Non-alcoholic fatty liver disease is associated with cardiovascular risk factors of metabolic syndrome. <i>Rev Med Chir Soc Med Nat Iasi.</i> 2012 Sep;116(3):692–9.                      | 2009                               |
| <b>Russia</b>   | Health of women in the northern Russian cities of Arkhangelsk and Murmansk                                                                                                                                                                                                             | 1998                               |
| <b>Russia</b>   | CINDI Behavioral Risk Factors Monitoring                                                                                                                                                                                                                                               | 2000                               |
| <b>Russia</b>   | Boylan S, Welch A, Pikhart H, Malyutina S, Pajak A, Kubinova R, Bragina O, Simonova G, Stepaniak U, Gilis-Januszewska A, Milla L, Peasey A, Marmot M, Bobak M. Dietary habits in three Central and Eastern European countries: the HAPIEE study. <i>BMC Public Health.</i> 2009;9:439. | 2002                               |
| <b>Russia</b>   | WHO MONICA Databook                                                                                                                                                                                                                                                                    | 1984, 1985, 1988, 1992, 1994, 1995 |

|                                         | Survey                                                                                                                                                                                                                           | Years |
|-----------------------------------------|----------------------------------------------------------------------------------------------------------------------------------------------------------------------------------------------------------------------------------|-------|
| <b>Saint Lucia</b>                      | WHO STEPS GSHS                                                                                                                                                                                                                   | 2007  |
| <b>Saint Vincent and the Grenadines</b> | WHO STEPS GSHS                                                                                                                                                                                                                   | 2007  |
| <b>Saudi Arabia</b>                     | Rahman Al-Nuaim A. High prevalence of metabolic risk factors for cardiovascular diseases among Saudi population, aged 30-64 years. <i>Int. J. Cardiol.</i> 1997 Dec 19;62(3):227–35.                                             | 1990  |
| <b>Saudi Arabia</b>                     | Warsy AS, el-Hazmi MA. Diabetes mellitus, hypertension and obesity--common multifactorial disorders in Saudis. <i>East. Mediterr. Health J.</i> 1999 Nov;5(6):1236–42.                                                           | 1992  |
| <b>Saudi Arabia</b>                     | al-Shammari SA, Khoja TA, al-Maatouq MA, al-Nuaim LA. High prevalence of clinical obesity among Saudi females: a prospective, cross-sectional study in the Riyadh region. <i>J Trop Med Hyg.</i> 1994 Jun;97(3):183–8.           | 1992  |
| <b>Saudi Arabia</b>                     | Abahussain NA, Musaiger AO, Nicholls PJ, Stevens R. Nutritional status of adolescent girls in the eastern province of Saudi Arabia. <i>Nutr Health.</i> 1999;13(3):171–7.                                                        | 1996  |
| <b>Saudi Arabia</b>                     | Al-Almaie SM. Prevalence of obesity and overweight among Saudi adolescents in Eastern Saudi Arabia. <i>Saudi Med J.</i> 2005 Apr;26(4):607–11.                                                                                   | 2001  |
| <b>Senegal</b>                          | Astagneau P, Lang T, Delarocque E, Jeannee E, Salem G. Arterial hypertension in urban Africa: an epidemiological study on a representative sample of Dakar inhabitants in Senegal. <i>J. Hypertens.</i> 1992 Sep;10(9):1095–101. | 1989  |
| <b>Senegal</b>                          | World Health Survey (WHS)                                                                                                                                                                                                        | 2003  |
| <b>Senegal</b>                          | WHO STEPS GSHS                                                                                                                                                                                                                   | 2005  |
| <b>Seychelles</b>                       | Bovet P, Kizirian N, Madeleine G, Blössner M, Chiolero A. Prevalence of thinness in children and adolescents in the Seychelles: comparison of two international growth references. <i>Nutr J.</i> 2011;10:65.                    | 1998  |
| <b>Seychelles</b>                       | WHO STEPS GSHS                                                                                                                                                                                                                   | 2007  |
| <b>South Africa</b>                     | Cameron N, Getz B. Sex differences in the prevalence of obesity in rural African adolescents. <i>Int. J. Obes. Relat. Metab. Disord.</i> 1997 Sep;21(9):775–82.                                                                  | 1985  |
| <b>South Africa</b>                     | Jinabhai CC, Taylor M, Sullivan KR. Changing patterns of under- and over-nutrition in South African children-future risks of non-communicable diseases. <i>Ann Trop Paediatr.</i> 2005 Mar;25(1):3–15.                           | 1995  |

|              | Survey                                                                                                                                                                                                                                                                                                                                                         | Years |
|--------------|----------------------------------------------------------------------------------------------------------------------------------------------------------------------------------------------------------------------------------------------------------------------------------------------------------------------------------------------------------------|-------|
| South Africa | Monyeki KD, Kemper HCG, Makgae PJ. Relationship between fat patterns, physical fitness and blood pressure of rural South African children: Ellisras Longitudinal Growth and Health Study. <i>J Hum Hypertens</i> . 2008 May;22(5):311–9.                                                                                                                       | 2000  |
| South Africa | Thorogood M, Connor M, Tollman S, Lewando Hundt G, Fowkes G, Marsh J. A cross-sectional study of vascular risk factors in a rural South African population: data from the Southern African Stroke Prevention Initiative (SASPI). <i>BMC Public Health</i> . 2007;7:326.                                                                                        | 2002  |
| South Africa | World Health Survey (WHS)                                                                                                                                                                                                                                                                                                                                      | 2003  |
| South Africa | WHO SAGE                                                                                                                                                                                                                                                                                                                                                       | 2007  |
| South Korea  | Yoo S, Lee S-Y, Kim K-N, Sung E. Obesity in Korean pre-adolescent school children: comparison of various anthropometric measurements based on bioelectrical impedance analysis. <i>Int J Obes (Lond)</i> . 2006 Jul;30(7):1086–90.                                                                                                                             | 2003  |
| South Korea  | Chang Y, Woo H-Y, Sung E, Kim CH, Kang H, Ju YS, Park KH. Prevalence of acanthosis nigricans in relation to anthropometric measures: community-based cross-sectional study in Korean pre-adolescent school children. <i>Pediatr Int</i> . 2008 Oct;50(5):667–73.                                                                                               | 2005  |
| South Korea  | Yoo S, Kim H-B, Lee S-Y, Kim B-S, Kim J-H, Yu J-H, Kim B-J, Hong S-J. Association between obesity and the prevalence of allergic diseases, atopy, and bronchial hyperresponsiveness in Korean adolescents. <i>Int. Arch. Allergy Immunol</i> . 2011;154(1):42–8.                                                                                               | 2006  |
| Spain        | Rodríguez-Artalejo F, Garcés C, Gorgojo L, López García E, Martín-Moreno JM, Benavente M, del Barrio JL, Rubio R, Ortega H, Fernández O, de Oya M, Investigators of the Four Provinces Study. Dietary patterns among children aged 6-7 y in four Spanish cities with widely differing cardiovascular mortality. <i>Eur J Clin Nutr</i> . 2002 Feb;56(2):141–8. | 1998  |
| Spain        | Tambalis KD, Panagiotakos DB, Psarra G, Sidossis LS. Inverse but independent trends in obesity and fitness levels among Greek children: a time-series analysis from 1997 to 2007. <i>Obes Facts</i> . 2011;4(2):165–74.                                                                                                                                        | 2000  |

|                  | Survey                                                                                                                                                                                                                                                                                                                                                                                                                                                              | Years            |
|------------------|---------------------------------------------------------------------------------------------------------------------------------------------------------------------------------------------------------------------------------------------------------------------------------------------------------------------------------------------------------------------------------------------------------------------------------------------------------------------|------------------|
| <b>Spain</b>     | Suárez-Varela MM, Alvarez LG-M, Kogan MD, Ferreira JC, Martínez Gimeno A, Aguinaga Ontoso I, González Díaz C, Arnedo Pena A, Domínguez Aurrecochea B, Busquets Monge RM, Blanco Quiros A, Batlles Garrido J, García de Andoain N, Varela AL-S, García Merino A, Gimeno Clemente N, Llopis González A. Diet and prevalence of atopic eczema in 6 to 7-year-old schoolchildren in Spain: ISAAC phase III. <i>J Investig Allergol Clin Immunol.</i> 2010;20(6):469–75. | 2001             |
| <b>Spain</b>     | WHO MONICA Databook                                                                                                                                                                                                                                                                                                                                                                                                                                                 | 1986, 1990, 1994 |
| <b>Spain</b>     | Ortiz-Moncada R, García M, González-Zapata LI, Fernandez E, Alvarez-Dardet C. Incidence of overweight and obesity in a Mediterranean population-based cohort: the Cornellà Health Interview Survey Follow-up Study (CHIS.FU). <i>Prev Med.</i> 2010 Feb;50(1-2):45–9.                                                                                                                                                                                               | 1994, 2002       |
| <b>Sri Lanka</b> | Wickramasinghe VP, Lamabadusuriya SP, Atapattu N, Sathyadas G, Kuruparanantha S, Karunarathne P. Nutritional status of schoolchildren in an urban area of Sri Lanka. <i>Ceylon Med J.</i> 2004 Dec;49(4):114–8.                                                                                                                                                                                                                                                     | 2002             |
| <b>Sri Lanka</b> | World Health Survey (WHS)                                                                                                                                                                                                                                                                                                                                                                                                                                           | 2003             |
| <b>Sri Lanka</b> | Dassanayake AS, Kasturiratne A, Rajindrajith S, Kalubowila U, Chakrawarthy S, De Silva AP, Makaya M, Mizoue T, Kato N, Wickremasinghe AR, de Silva HJ. Prevalence and risk factors for non-alcoholic fatty liver disease among adults in an urban Sri Lankan population. <i>J. Gastroenterol. Hepatol.</i> 2009 Jul;24(7):1284–8.                                                                                                                                   | 2007             |
| <b>Sri Lanka</b> | Wickramasinghe VP, Arambepola C, Bandara P, Abeysekera M, Kuruppu S, Dilshan P, Dissanayake BS. Distribution of obesity-related metabolic markers among 5-15 year old children from an urban area of Sri Lanka. <i>Ann. Hum. Biol.</i> 2013 Mar;40(2):168–74.                                                                                                                                                                                                       | 2009             |
| <b>Sudan</b>     | STEPS Noncommunicable Disease Risk Factors Survey                                                                                                                                                                                                                                                                                                                                                                                                                   | 2005             |
| <b>Swaziland</b> | WHO STEPS GSHS                                                                                                                                                                                                                                                                                                                                                                                                                                                      | 2003             |
| <b>Swaziland</b> | World Health Survey (WHS)                                                                                                                                                                                                                                                                                                                                                                                                                                           | 2003             |
| <b>Sweden</b>    | Eriksson H, Welin L, Wilhelmsen L, Larsson B, Ohlson LO, Svärdsudd K, Tibblin G. Metabolic disturbances in hypertension: results from the population study “men born in 1913.” <i>J. Intern. Med.</i> 1992 Nov;232(5):389–95.                                                                                                                                                                                                                                       | 1980             |

|                    | Survey                                                                                                                                                                                                                      | Years                  |
|--------------------|-----------------------------------------------------------------------------------------------------------------------------------------------------------------------------------------------------------------------------|------------------------|
| <b>Sweden</b>      | Ekelund U, Neovius M, Linné Y, Brage S, Wareham NJ, Rössner S. Associations between physical activity and fat mass in adolescents: the Stockholm Weight Development Study. <i>Am. J. Clin. Nutr.</i> 2005 Feb;81(2):355–60. | 2001                   |
| <b>Sweden</b>      | Neovius M, Rossner SM, Vågstrand K, von Hausswolff-Juhlin YL, Hoffstedt J, Ekelund U. Adiposity measures as indicators of metabolic risk factors in adolescents. <i>Obes Facts.</i> 2009;2(5):294–301.                      | 2001                   |
| <b>Sweden</b>      | Angbratt M, Ekberg J, Walter L, Timpka T. Prediction of obesity from infancy to adolescence. <i>Acta Paediatr.</i> 2011 Sep;100(9):1249–52.                                                                                 | 2007                   |
| <b>Sweden</b>      | Theorell-Haglöw J, Berglund L, Janson C, Lindberg E. Sleep duration and central obesity in women - differences between short sleepers and long sleepers. <i>Sleep Med.</i> 2012 Sep;13(8):1079–85.                          | 2009                   |
| <b>Sweden</b>      | Gustafsson PE, Persson M, Hammarström A. Socio-economic disadvantage and body mass over the life course in women and men: results from the Northern Swedish Cohort. <i>Eur J Public Health.</i> 2012 Jun;22(3):322–7.       | 1981, 1986, 1995, 2008 |
| <b>Sweden</b>      | WHO MONICA Databook                                                                                                                                                                                                         | 1985, 1986, 1990, 1994 |
| <b>Sweden</b>      | Sundblom E, Petzold M, Rasmussen F, Callmer E, Lissner L. Childhood overweight and obesity prevalences levelling off in Stockholm but socioeconomic differences persist. <i>Int J Obes (Lond).</i> 2008 Oct;32(10):1525–30. | 1999, 2003             |
| <b>Switzerland</b> | WHO MONICA Databook                                                                                                                                                                                                         | 1984, 1985, 1988, 1992 |
| <b>Switzerland</b> | Faeh D, Braun J, Bopp M. Prevalence of obesity in Switzerland 1992-2007: the impact of education, income and occupational class. <i>Obes Rev.</i> 2011 Mar;12(3):151–66.                                                    | 1992, 1997, 2002, 2007 |
| <b>Switzerland</b> | Marques-Vidal P, Bovet P, Paccaud F, Chiolero A. Changes of overweight and obesity in the adult Swiss population according to educational level, from 1992 to 2007. <i>BMC Public Health.</i> 2010;10:87.                   | 1992, 1997, 2002, 2007 |
| <b>Switzerland</b> | Volken T, Schaffert R, Rüesch P. Need for weight management in Switzerland: findings from National Blood Pressure Week 2009. <i>BMC Public Health.</i> 2011;11:473.                                                         | 2007, 2009             |
| <b>Taiwan</b>      | Tai TY, Chuang LM, Wu HP, Chen CJ. Association of body build with non-insulin-dependent diabetes mellitus and hypertension among Chinese adults: a 4-year follow-up study. <i>Int J Epidemiol.</i> 1992 Jun;21(3):511–7.    | 1986                   |

|                            | Survey                                                                                                                                                                                                                                                                                                                              | Years      |
|----------------------------|-------------------------------------------------------------------------------------------------------------------------------------------------------------------------------------------------------------------------------------------------------------------------------------------------------------------------------------|------------|
| <b>Taiwan</b>              | Page RM, Lee C-M, Miao N-F. Assessing prevalence of overweight and obesity through self-reports of height and weight by high school students in Taipei, Taiwan. <i>J Sch Health</i> . 2004 Dec;74(10):401–7.                                                                                                                        | 1999       |
| <b>Taiwan</b>              | Ng K-C, Lai S-W. Application of anthropometric indices in childhood obesity. <i>South. Med. J</i> . 2004 Jun;97(6):566–70.                                                                                                                                                                                                          | 2000       |
| <b>Taiwan</b>              | Lin F-H, Chu N-F, Hsieh A-T. The trend of hypertension and its relationship to the weight status among Taiwanese young adolescents. <i>J Hum Hypertens</i> . 2012 Jan;26(1):48–55.                                                                                                                                                  | 1996, 2006 |
| <b>Tanzania</b>            | Aspray TJ, Mugusi F, Rashid S, Whiting D, Edwards R, Alberti KG, Unwin NC. Essential Non-Communicable Disease Health Intervention Project. Rural and urban differences in diabetes prevalence in Tanzania: the role of obesity, physical inactivity and urban living. <i>Trans. R. Soc. Trop. Med. Hyg</i> . 2000 Dec;94(6):637–44. | 1996       |
| <b>Tanzania</b>            | Ghana Urban Household Panel Survey                                                                                                                                                                                                                                                                                                  | 2003       |
| <b>Togo</b>                | Baragou S, Djibril M, Atta B, Damorou F, Pio M, Balogou A. Prevalence of cardiovascular risk factors in an urban area of Togo: a WHO STEPS-wise approach in Lome, Togo. <i>Cardiovasc J Afr</i> . 2012 Jul;23(6):309–12.                                                                                                            | 2009       |
| <b>Trinidad and Tobago</b> | WHO STEPS GSHS                                                                                                                                                                                                                                                                                                                      | 2007       |
| <b>Tunisia</b>             | Ghannem H, Darioli R, Limam K, Harrabi I, Gaha R, Trabelsi L, Fredj AH, Bouslama A. Epidemiology of cardiovascular risk factors among schoolchildren in Sousse, Tunisia. <i>J Cardiovasc Risk</i> . 2001 Apr;8(2):87–91.                                                                                                            | 1988       |
| <b>Tunisia</b>             | Ghannem H, Hadj Fredj A. Prevalence of cardiovascular risk factors in the urban population of Soussa in Tunisia. <i>J Public Health Med</i> . 1997 Dec;19(4):392–6.                                                                                                                                                                 | 1995       |
| <b>Tunisia</b>             | Ghannem H, Khelifa K, Harrabi I, Ben Abdelaziz A, Gaha R. Study of cardiovascular disease risk factors among urban schoolchildren in Sousse, Tunisia. <i>East. Mediterr. Health J</i> . 2000 Nov;6(5-6):1046–54.                                                                                                                    | 1997       |
| <b>Tunisia</b>             | Ghannem H, Trabelsi L, Gaha R, Harrabi I, Essoussi AS. Study of cardiovascular disease risk factors among rural schoolchildren in Sousse, Tunisia. <i>East. Mediterr. Health J</i> . 2001 Sep;7(4-5):617–24.                                                                                                                        | 1998       |
| <b>Tunisia</b>             | World Health Survey (WHS)                                                                                                                                                                                                                                                                                                           | 2003       |

|                      | Survey                                                                                                                                                                                                                                        | Years |
|----------------------|-----------------------------------------------------------------------------------------------------------------------------------------------------------------------------------------------------------------------------------------------|-------|
| Turkey               | Agirbasli M, Cakir S, Ozme S, Ciliz G. Metabolic syndrome in Turkish children and adolescents. <i>Metab. Clin. Exp.</i> 2006 Aug;55(8):1002–6.                                                                                                | 1992  |
| Turkey               | Erem C, Yildiz R, Kavgaci H, Karahan C, Deger O, Can G, Telatar M. Prevalence of diabetes, obesity and hypertension in a Turkish population (Trabzon city). <i>Diabetes Res. Clin. Pract.</i> 2001 Dec;54(3):203–8.                           | 1998  |
| Turkey               | Manios Y, Kolotourou M, Moschonis G, Sur H, Keskin Y, Kocaoglu B, Hayran O. Macronutrient intake, physical activity, serum lipids and increased body weight in primary schoolchildren in Istanbul. <i>Pediatr Int.</i> 2005 Apr;47(2):159–66. | 2001  |
| Turkey               | Oner N, Vatansever U, Sari A, Ekuklu E, Güzel A, Karasalihoglu S, Boris NW. Prevalence of underweight, overweight and obesity in Turkish adolescents. <i>Swiss Med Wkly.</i> 2004 Sep 4;134(35-36):529–33.                                    | 2001  |
| Turkey               | Sundblom E, Petzold M, Rasmussen F, Callmer E, Lissner L. Childhood overweight and obesity prevalences levelling off in Stockholm but socioeconomic differences persist. <i>Int J Obes (Lond).</i> 2008 Oct;32(10):1525–30.                   | 2001  |
| Turkey               | World Health Survey (WHS)                                                                                                                                                                                                                     | 2003  |
| Turkey               | Ozmen D, Ozmen E, Ergin D, Cetinkaya AC, Sen N, Dundar PE, Taskin EO. The association of self-esteem, depression and body satisfaction with obesity among Turkish adolescents. <i>BMC Public Health.</i> 2007;7:80.                           | 2004  |
| Turkey               | Ozer BK. Growth reference centiles and secular changes in Turkish children and adolescents. <i>Econ Hum Biol.</i> 2007 Jul;5(2):280–301.                                                                                                      | 2005  |
| United Arab Emirates | Carter AO, Saadi HF, Reed RL, Dunn EV. Assessment of obesity, lifestyle, and reproductive health needs of female citizens of Al Ain, United Arab Emirates. <i>J Health Popul Nutr.</i> 2004 Mar;22(1):75–83.                                  | 2000  |
| United Arab Emirates | World Health Survey (WHS)                                                                                                                                                                                                                     | 2003  |
| United Arab Emirates | Zaal AAB, Brebner J, Musaiger AO, Souza RD. Anthropometric characteristics and obesity among adolescents in the United Arab Emirates. <i>East. Mediterr. Health J.</i> 2011 May;17(5):382–6.                                                  | 2008  |

|                | Survey                                                                                                                                                                                                                                                                                                                       | Years                        |
|----------------|------------------------------------------------------------------------------------------------------------------------------------------------------------------------------------------------------------------------------------------------------------------------------------------------------------------------------|------------------------------|
| United Kingdom | Löfdahl HE, Lane A, Lu Y, Lagergren P, Harvey RF, Blazey JM, Lagergren J. Increased population prevalence of reflux and obesity in the United Kingdom compared with Sweden: a potential explanation for the difference in incidence of esophageal adenocarcinoma. <i>Eur J Gastroenterol Hepatol.</i> 2011 Feb;23(2):128–32. | 1996                         |
| United Kingdom | Mitchell RT, McDougall CM, Crum JE. Decreasing prevalence of obesity in primary schoolchildren. <i>Arch. Dis. Child.</i> 2007 Feb;92(2):153–4.                                                                                                                                                                               | 2004                         |
| United Kingdom | Sandercock GRH, Ogunleye A, Voss C. Comparison of cardiorespiratory fitness and body mass index between rural and urban youth: findings from the East of England Healthy Hearts Study. <i>Pediatr Int.</i> 2011 Oct;53(5):718–24.                                                                                            | 2007                         |
| United Kingdom | WHO MONICA Databook                                                                                                                                                                                                                                                                                                          | 1983, 1986, 1991, 1992, 1995 |
| United Kingdom | Stamatakis E, Zaninotto P, Falaschetti E, Mindell J, Head J. Time trends in childhood and adolescent obesity in England from 1995 to 2007 and projections of prevalence to 2015. <i>J Epidemiol Community Health.</i> 2010 Feb;64(2):167–74.                                                                                 | 1995-2007                    |
| United States  | WHO MONICA Databook                                                                                                                                                                                                                                                                                                          | 1979, 1985, 1989             |
| Uruguay        | Survey on Health, Well-Being and Aging in Latin America and the Caribbean (SABE)                                                                                                                                                                                                                                             | 1999                         |
| Uruguay        | World Health Survey (WHS)                                                                                                                                                                                                                                                                                                    | 2003                         |
| Uruguay        | WHO STEPS GSHS                                                                                                                                                                                                                                                                                                               | 2006                         |
| Uruguay        | STEPS Noncommunicable Disease Risk Factors Survey                                                                                                                                                                                                                                                                            | 2006                         |
| Vietnam        | Dieu HTT, Dibley MJ, Sibbritt DW, Hanh TTM. Trends in overweight and obesity in pre-school children in urban areas of Ho Chi Minh City, Vietnam, from 2002 to 2005. <i>Public Health Nutr.</i> 2009 May;12(5):702–9.                                                                                                         | 2002                         |
| Vietnam        | Tang HK, Dibley MJ, Sibbritt D, Tran HM. Gender and socio-economic differences in BMI of secondary high school students in Ho Chi Minh city. <i>Asia Pac J Clin Nutr.</i> 2007;16(1):74–83.                                                                                                                                  | 2002                         |
| Vietnam        | World Health Survey (WHS)                                                                                                                                                                                                                                                                                                    | 2003                         |
| Vietnam        | Hong TK, Dibley MJ, Sibbritt D, Binh PNT, Trang NHHD, Hanh TTM. Overweight and obesity are rapidly emerging among adolescents in Ho Chi Minh City, Vietnam, 2002-2004. <i>Int J Pediatr Obes.</i> 2007;2(4):194–201.                                                                                                         | 2004                         |



| Survey   |                                                                                                                                                                                                                          | Years |
|----------|--------------------------------------------------------------------------------------------------------------------------------------------------------------------------------------------------------------------------|-------|
| Vietnam  | Walls HL, Peeters A, Son PT, Quang NN, Hoai NTT, Loi DD, Viet NL, Khai PG, Reid CM. Prevalence of underweight, overweight and obesity in urban Hanoi, Vietnam. <i>Asia Pac J Clin Nutr.</i> 2009;18(2):234–9.            | 2004  |
| Vietnam  | Dieu HTT, Dibley MJ, Sibbritt D, Hanh TTM. Prevalence of overweight and obesity in preschool children and associated socio-demographic factors in Ho Chi Minh City, Vietnam. <i>Int J Pediatr Obes.</i> 2007;2(1):40–50. | 2005  |
| Zambia   | Ng'andu NH. Blood pressure levels of Zambian rural adolescents and their relationship to age, sex, weight, height and three weight-for-height indices. <i>Int J Epidemiol.</i> 1992 Apr;21(2):246–52.                    | 1986  |
| Zambia   | WHO STEPS GSHS                                                                                                                                                                                                           | 2004  |
| Zimbabwe | World Health Survey (WHS)                                                                                                                                                                                                | 2003  |

**Webtable 9:** Prevalence of overweight and obesity

| Country/Region              | Males, 1980         |                     | Females, 1980       |                     | Males, 1990         |                     | Females, 1990       |                     | Males, 2000         |                     | Females, 2000       |                     | Males, 2013         |                     | Females, 2013       |                     |
|-----------------------------|---------------------|---------------------|---------------------|---------------------|---------------------|---------------------|---------------------|---------------------|---------------------|---------------------|---------------------|---------------------|---------------------|---------------------|---------------------|---------------------|
|                             | <20                 | >20                 | <20                 | >20                 | <20                 | >20                 | <20                 | >20                 | <20                 | >20                 | <20                 | >20                 | <20                 | >20                 | <20                 | >20                 |
| <b>Andean Latin America</b> | 17.5<br>(15.6-19.5) | 42.0<br>(40.2-43.8) | 24.2<br>(21.8-26.8) | 53.1<br>(51.2-55.0) | 18.0<br>(16.3-19.7) | 42.6<br>(40.9-44.3) | 25.1<br>(22.9-27.5) | 54.1<br>(52.7-55.5) | 17.4<br>(15.9-19.0) | 42.1<br>(40.2-44.1) | 27.5<br>(25.3-29.7) | 61.5<br>(60.4-62.6) | 16.7<br>(15.1-18.3) | 45.0<br>(43.2-46.8) | 27.2<br>(24.9-29.5) | 66.7<br>(65.6-67.7) |
| <b>Bolivia</b>              | 19.7<br>(16.6-23.0) | 49.9<br>(47.1-52.7) | 24.1<br>(20.5-28.4) | 45.1<br>(42.2-48.2) | 19.8<br>(16.9-22.8) | 50.0<br>(47.2-52.8) | 24.3<br>(20.9-28.0) | 44.8<br>(42.1-47.6) | 21.0<br>(18.3-24.1) | 51.2<br>(48.3-54.0) | 28.0<br>(24.5-31.7) | 56.0<br>(54.1-57.9) | 20.5<br>(17.4-24.0) | 51.9<br>(49.1-54.5) | 28.2<br>(24.4-32.4) | 62.0<br>(59.7-64.4) |
| <b>Ecuador</b>              | 11.6<br>(9.6-13.7)  | 35.1<br>(32.5-37.7) | 24.9<br>(20.8-29.6) | 63.5<br>(60.5-66.4) | 12.6<br>(10.6-14.9) | 37.6<br>(34.9-40.2) | 27.1<br>(22.9-31.7) | 66.2<br>(63.4-69.2) | 12.9<br>(10.9-15.1) | 38.3<br>(35.5-41.2) | 28.5<br>(24.7-32.3) | 68.2<br>(66.0-70.2) | 13.7<br>(11.4-16.2) | 40.2<br>(37.5-42.9) | 29.6<br>(25.4-34.2) | 69.8<br>(67.2-72.1) |
| <b>Peru</b>                 | 19.6<br>(16.6-22.8) | 42.8<br>(40.0-45.8) | 23.9<br>(20.2-27.9) | 50.9<br>(48.1-53.5) | 19.9<br>(17.1-22.8) | 42.9<br>(40.1-45.5) | 24.4<br>(20.8-28.1) | 51.2<br>(49.2-53.1) | 18.4<br>(16.0-20.9) | 41.3<br>(38.4-44.4) | 26.8<br>(23.6-30.2) | 59.9<br>(58.4-61.5) | 16.6<br>(14.2-19.4) | 45.4<br>(42.7-48.2) | 25.6<br>(22.3-29.2) | 66.5<br>(65.1-67.9) |
| <b>Australasia</b>          | 16.2<br>(14.2-18.4) | 56.1<br>(53.8-58.3) | 16.2<br>(14.0-18.6) | 42.9<br>(40.7-45.4) | 18.1<br>(16.0-20.4) | 55.7<br>(53.9-57.5) | 17.7<br>(15.5-20.2) | 42.0<br>(40.2-43.9) | 21.3<br>(19.4-23.3) | 61.9<br>(60.0-63.5) | 20.5<br>(18.5-22.6) | 49.2<br>(47.2-51.1) | 25.3<br>(22.7-28.2) | 68.6<br>(66.3-70.6) | 24.0<br>(21.3-26.9) | 56.7<br>(54.4-59.1) |
| <b>Australia</b>            | 15.5<br>(13.2-18.3) | 56.1<br>(53.5-58.8) | 15.8<br>(13.2-18.6) | 42.7<br>(40.0-45.6) | 17.3<br>(14.9-20.1) | 55.3<br>(53.2-57.4) | 17.2<br>(14.5-20.2) | 41.1<br>(39.0-43.4) | 20.2<br>(17.9-22.7) | 61.5<br>(59.3-63.6) | 19.3<br>(16.9-21.9) | 48.5<br>(46.2-50.9) | 24.4<br>(21.4-28.0) | 68.2<br>(65.6-70.5) | 23.0<br>(19.9-26.5) | 56.1<br>(53.4-58.9) |

| Country/Region                          | Males, 1980         |                     | Females, 1980       |                     | Males, 1990         |                     | Females, 1990       |                     | Males, 2000         |                     | Females, 2000       |                     | Males, 2013         |                     | Females, 2013       |                     |
|-----------------------------------------|---------------------|---------------------|---------------------|---------------------|---------------------|---------------------|---------------------|---------------------|---------------------|---------------------|---------------------|---------------------|---------------------|---------------------|---------------------|---------------------|
|                                         | <20                 | >20                 | <20                 | >20                 | <20                 | >20                 | <20                 | >20                 | <20                 | >20                 | <20                 | >20                 | <20                 | >20                 | <20                 | >20                 |
| <b>New Zealand</b>                      | 19.2<br>(16.2-22.5) | 55.8<br>(52.9-58.5) | 17.9<br>(15.0-21.4) | 43.8<br>(40.8-46.7) | 21.4<br>(18.4-24.7) | 57.8<br>(55.2-60.2) | 20.3<br>(17.0-23.7) | 46.7<br>(44.3-49.3) | 26.5<br>(23.8-29.3) | 63.5<br>(61.8-65.2) | 25.8<br>(23.2-28.5) | 52.2<br>(50.5-53.8) | 29.6<br>(26.0-33.3) | 71.4<br>(69.6-73.3) | 28.7<br>(25.3-32.6) | 60.0<br>(57.8-62.2) |
| <b>Caribbean</b>                        | 10.2<br>(9.3-11.2)  | 32.2<br>(31.0-33.6) | 15.8<br>(14.4-17.2) | 41.1<br>(39.6-42.3) | 10.0<br>(9.2-10.9)  | 32.4<br>(31.2-33.8) | 15.3<br>(14.0-16.6) | 41.0<br>(39.7-42.3) | 11.5<br>(10.6-12.5) | 33.9<br>(32.5-35.2) | 17.4<br>(16.0-18.7) | 45.9<br>(44.5-47.4) | 13.4<br>(12.3-14.6) | 37.8<br>(36.4-39.1) | 19.9<br>(18.4-21.5) | 50.4<br>(49.1-51.8) |
| <b>Antigua and Barbuda</b>              | 8.3<br>(6.8-9.9)    | 28.5<br>(26.2-30.8) | 15.8<br>(13.1-18.9) | 41.8<br>(39.0-44.8) | 10.5<br>(8.7-12.7)  | 33.8<br>(31.3-36.4) | 19.2<br>(16.0-22.8) | 47.0<br>(44.1-50.1) | 9.7<br>(8.1-11.6)   | 31.8<br>(29.3-34.3) | 18.3<br>(15.4-21.9) | 45.6<br>(42.7-48.4) | 11.2<br>(9.4-13.4)  | 35.5<br>(32.7-38.4) | 20.5<br>(17.3-24.2) | 49.1<br>(46.3-52.0) |
| <b>Barbados</b>                         | 22.6<br>(19.3-26.5) | 64.1<br>(61.5-66.7) | 29.1<br>(24.8-33.6) | 66.8<br>(64.1-69.4) | 23.7<br>(20.1-27.7) | 64.1<br>(61.3-66.8) | 30.1<br>(25.8-34.7) | 68.0<br>(65.6-70.4) | 22.4<br>(19.1-25.9) | 56.1<br>(53.8-58.5) | 29.1<br>(25.4-33.3) | 66.7<br>(64.9-68.7) | 25.3<br>(21.6-29.1) | 57.5<br>(54.7-60.1) | 32.4<br>(27.9-37.3) | 69.9<br>(67.2-72.4) |
| <b>Belize</b>                           | 20.8<br>(17.7-24.3) | 55.2<br>(52.3-58.0) | 30.1<br>(25.8-35.0) | 72.6<br>(70.1-75.0) | 20.9<br>(17.8-24.4) | 55.2<br>(52.4-58.0) | 30.0<br>(25.8-34.6) | 72.6<br>(70.1-75.1) | 20.7<br>(17.6-23.9) | 56.5<br>(53.8-59.4) | 29.7<br>(25.6-34.1) | 73.8<br>(71.4-76.1) | 18.4<br>(15.7-21.4) | 58.6<br>(55.9-61.4) | 27.1<br>(23.1-31.5) | 75.3<br>(72.9-77.5) |
| <b>Cuba</b>                             | 12.4<br>(10.4-14.8) | 32.2<br>(29.7-34.7) | 19.7<br>(16.4-23.3) | 45.6<br>(42.7-48.4) | 12.2<br>(10.1-14.4) | 31.4<br>(29.0-34.2) | 19.4<br>(16.2-22.8) | 45.2<br>(42.3-48.2) | 13.3<br>(11.1-15.8) | 32.8<br>(30.4-35.5) | 20.9<br>(17.5-24.8) | 47.1<br>(44.1-50.3) | 15.7<br>(13.1-18.4) | 37.5<br>(34.5-40.4) | 23.9<br>(20.3-28.1) | 51.4<br>(48.5-54.3) |
| <b>Dominica</b>                         | 8.2<br>(6.7-9.8)    | 22.9<br>(20.9-24.9) | 18.1<br>(15.2-21.4) | 63.4<br>(60.8-66.3) | 11.9<br>(9.8-14.1)  | 30.7<br>(28.3-33.1) | 24.1<br>(20.3-28.1) | 69.5<br>(66.9-72.1) | 13.3<br>(11.0-15.9) | 32.8<br>(30.3-35.5) | 26.3<br>(22.3-30.6) | 71.6<br>(69.2-73.9) | 15.2<br>(12.7-18.0) | 36.6<br>(33.8-39.1) | 29.2<br>(24.5-33.6) | 74.0<br>(71.5-76.4) |
| <b>Dominican Republic</b>               | 9.9<br>(8.2-11.8)   | 42.8<br>(40.0-45.8) | 12.9<br>(10.5-15.3) | 35.5<br>(32.7-38.3) | 11.0<br>(9.3-12.9)  | 44.0<br>(41.2-47.1) | 13.8<br>(11.6-16.5) | 37.7<br>(35.6-39.9) | 14.6<br>(12.4-17.1) | 46.0<br>(42.9-49.0) | 19.4<br>(16.5-22.6) | 49.7<br>(46.9-52.4) | 17.8<br>(14.8-20.9) | 50.7<br>(47.9-53.7) | 25.2<br>(21.5-29.5) | 54.8<br>(51.7-57.9) |
| <b>Grenada</b>                          | 9.5<br>(7.9-11.3)   | 31.7<br>(29.2-34.2) | 17.8<br>(14.6-21.4) | 45.0<br>(42.2-48.0) | 10.8<br>(8.7-13.0)  | 34.6<br>(32.1-37.2) | 19.7<br>(16.4-23.1) | 47.6<br>(44.8-50.6) | 10.5<br>(8.7-12.5)  | 33.5<br>(30.8-36.1) | 19.4<br>(16.3-23.0) | 47.3<br>(44.3-50.3) | 11.6<br>(9.7-13.9)  | 36.5<br>(33.9-39.0) | 21.2<br>(17.8-25.1) | 50.2<br>(47.2-53.2) |
| <b>Guyana</b>                           | 8.5<br>(7.0-10.2)   | 35.4<br>(32.8-38.3) | 15.9<br>(13.0-18.9) | 56.8<br>(53.7-59.8) | 8.8<br>(7.3-10.5)   | 36.0<br>(33.4-38.8) | 16.2<br>(13.3-19.5) | 57.4<br>(54.5-60.5) | 10.8<br>(9.1-12.8)  | 40.0<br>(37.4-42.5) | 20.0<br>(16.8-23.3) | 61.3<br>(58.3-63.9) | 11.5<br>(9.8-13.3)  | 40.9<br>(38.6-43.2) | 22.2<br>(18.8-25.8) | 62.3<br>(60.2-64.5) |
| <b>Haiti</b>                            | 6.7<br>(5.5-8.1)    | 14.8<br>(13.3-16.4) | 10.2<br>(8.4-12.6)  | 21.3<br>(19.1-23.3) | 6.3<br>(5.2-7.6)    | 13.8<br>(12.4-15.2) | 9.7<br>(7.9-11.7)   | 19.3<br>(17.6-21.2) | 6.5<br>(5.6-7.6)    | 14.2<br>(13.2-15.3) | 9.5<br>(8.2-11.1)   | 25.5<br>(24.0-27.1) | 7.7<br>(6.5-9.1)    | 16.6<br>(15.1-18.4) | 9.5<br>(7.9-11.5)   | 30.8<br>(28.7-33.0) |
| <b>Jamaica</b>                          | 11.2<br>(9.4-13.4)  | 30.3<br>(28.1-32.9) | 23.6<br>(19.9-27.6) | 54.2<br>(51.2-57.2) | 11.5<br>(9.5-13.8)  | 30.9<br>(28.4-33.5) | 23.9<br>(20.1-28.1) | 54.6<br>(51.6-57.6) | 12.2<br>(10.1-14.4) | 32.6<br>(30.1-35.0) | 27.2<br>(23.1-31.5) | 57.4<br>(54.6-60.0) | 13.4<br>(11.1-15.7) | 37.1<br>(34.3-39.9) | 31.0<br>(26.5-36.0) | 62.7<br>(59.7-65.2) |
| <b>Saint Lucia</b>                      | 11.0<br>(9.1-13.1)  | 37.8<br>(35.0-40.5) | 12.3<br>(10.1-14.9) | 35.9<br>(33.0-38.8) | 13.3<br>(11.0-15.7) | 42.8<br>(40.1-45.5) | 14.6<br>(11.8-17.5) | 40.0<br>(37.2-42.7) | 14.8<br>(12.2-17.4) | 45.1<br>(42.3-48.0) | 16.1<br>(13.3-19.2) | 42.5<br>(39.6-45.4) | 15.8<br>(13.2-18.7) | 46.9<br>(44.0-49.6) | 17.0<br>(13.9-20.2) | 44.2<br>(41.4-47.2) |
| <b>Saint Vincent and the Grenadines</b> | 10.3<br>(8.5-12.4)  | 33.8<br>(31.2-36.3) | 19.0<br>(15.8-22.4) | 46.8<br>(44.0-49.7) | 10.7<br>(9.0-12.7)  | 34.5<br>(32.0-37.1) | 19.5<br>(16.3-23.1) | 47.6<br>(44.6-50.4) | 12.1<br>(10.1-14.4) | 37.0<br>(34.3-39.5) | 21.7<br>(18.2-25.9) | 50.7<br>(47.6-53.9) | 15.3<br>(12.7-17.9) | 43.5<br>(40.8-46.3) | 26.0<br>(22.1-30.7) | 56.5<br>(53.2-59.7) |

| Country/Region             | Males, 1980         |                     | Females, 1980       |                     | Males, 1990         |                     | Females, 1990       |                     | Males, 2000         |                     | Females, 2000       |                     | Males, 2013         |                     | Females, 2013       |                     |
|----------------------------|---------------------|---------------------|---------------------|---------------------|---------------------|---------------------|---------------------|---------------------|---------------------|---------------------|---------------------|---------------------|---------------------|---------------------|---------------------|---------------------|
|                            | <20                 | >20                 | <20                 | >20                 | <20                 | >20                 | <20                 | >20                 | <20                 | >20                 | <20                 | >20                 | <20                 | >20                 | <20                 | >20                 |
| <b>Suriname</b>            | 8.5<br>(7.0-10.3)   | 42.7<br>(40.1-45.5) | 17.2<br>(14.3-20.4) | 57.6<br>(54.7-60.6) | 9.5<br>(7.7-11.4)   | 45.4<br>(42.6-48.1) | 19.0<br>(15.8-22.6) | 60.1<br>(57.0-63.0) | 10.1<br>(8.3-12.1)  | 46.1<br>(43.1-49.0) | 20.2<br>(16.7-24.1) | 61.3<br>(58.2-64.2) | 11.8<br>(9.8-14.0)  | 49.7<br>(46.9-52.5) | 22.6<br>(19.0-26.3) | 64.7<br>(61.8-67.5) |
| <b>The Bahamas</b>         | 11.8<br>(9.9-14.0)  | 37.1<br>(34.5-39.9) | 21.1<br>(17.6-25.0) | 49.8<br>(46.7-52.6) | 12.9<br>(10.8-15.3) | 39.4<br>(36.7-42.2) | 22.6<br>(18.9-26.6) | 51.9<br>(48.7-54.9) | 13.5<br>(11.1-16.1) | 39.9<br>(37.1-42.7) | 23.4<br>(19.8-27.4) | 53.0<br>(49.9-56.1) | 19.1<br>(16.3-22.3) | 49.9<br>(47.1-52.8) | 33.3<br>(28.7-38.3) | 64.3<br>(61.4-67.2) |
| <b>Trinidad and Tobago</b> | 7.6<br>(6.3-9.1)    | 52.8<br>(49.9-55.7) | 9.0<br>(7.3-10.9)   | 63.1<br>(60.4-65.8) | 8.3<br>(6.8-10.1)   | 51.6<br>(48.5-54.5) | 10.0<br>(8.0-12.0)  | 62.3<br>(59.6-65.1) | 14.4<br>(12.0-17.1) | 51.4<br>(48.5-54.4) | 16.7<br>(13.8-19.8) | 62.8<br>(59.9-65.4) | 19.2<br>(16.3-22.1) | 55.5<br>(53.2-57.7) | 21.3<br>(18.0-25.0) | 66.1<br>(64.1-68.1) |
| <b>Central Asia</b>        | 15.4<br>(14.2-16.6) | 40.5<br>(39.4-41.7) | 16.4<br>(15.1-17.8) | 44.5<br>(43.4-45.6) | 17.1<br>(15.8-18.4) | 43.3<br>(42.1-44.5) | 17.8<br>(16.4-19.3) | 46.6<br>(45.5-47.6) | 17.0<br>(15.8-18.3) | 44.7<br>(43.7-45.6) | 17.7<br>(16.4-19.2) | 47.7<br>(46.8-48.7) | 19.9<br>(18.6-21.4) | 50.8<br>(49.5-52.0) | 20.6<br>(19.0-22.1) | 53.2<br>(52.0-54.4) |
| <b>Armenia</b>             | 16.8<br>(14.1-19.8) | 34.3<br>(31.7-36.8) | 18.9<br>(15.8-22.4) | 51.7<br>(49.1-54.5) | 17.7<br>(14.7-20.7) | 35.9<br>(33.4-38.6) | 20.1<br>(16.9-23.4) | 53.0<br>(50.5-55.7) | 19.0<br>(16.4-21.5) | 38.3<br>(35.9-40.7) | 21.2<br>(18.2-24.5) | 55.7<br>(54.2-57.2) | 23.3<br>(20.1-27.1) | 44.7<br>(42.1-47.3) | 24.1<br>(20.7-28.2) | 60.4<br>(58.0-62.7) |
| <b>Azerbaijan</b>          | 9.9<br>(8.2-11.8)   | 41.3<br>(38.8-43.9) | 10.5<br>(8.6-12.7)  | 52.1<br>(49.5-54.9) | 10.8<br>(9.0-12.9)  | 43.6<br>(40.9-46.3) | 11.4<br>(9.1-13.6)  | 54.2<br>(51.5-56.7) | 13.9<br>(11.8-16.2) | 48.3<br>(46.0-50.9) | 13.9<br>(11.8-16.4) | 58.5<br>(56.2-60.9) | 24.9<br>(21.2-28.6) | 59.0<br>(56.6-61.4) | 23.1<br>(19.5-26.9) | 67.3<br>(65.1-69.5) |
| <b>Georgia</b>             | 16.6<br>(13.8-19.6) | 45.8<br>(42.8-48.6) | 20.4<br>(16.9-23.9) | 43.3<br>(40.5-45.9) | 17.4<br>(14.5-20.4) | 47.0<br>(44.1-50.0) | 21.0<br>(17.5-24.7) | 44.2<br>(41.5-47.0) | 23.0<br>(19.4-26.9) | 54.9<br>(52.1-57.7) | 26.9<br>(23.0-31.2) | 52.3<br>(49.6-55.1) | 26.3<br>(22.5-30.1) | 58.7<br>(56.0-61.4) | 29.9<br>(25.7-34.3) | 59.7<br>(57.1-62.5) |
| <b>Kazakhstan</b>          | 11.5<br>(9.6-13.7)  | 35.6<br>(32.9-38.5) | 15.1<br>(12.5-18.0) | 48.5<br>(45.8-51.3) | 13.4<br>(11.3-15.9) | 40.0<br>(37.3-42.9) | 17.3<br>(14.3-20.4) | 52.0<br>(49.6-54.3) | 14.2<br>(11.9-16.8) | 40.7<br>(38.1-43.6) | 16.1<br>(13.6-18.8) | 48.6<br>(46.5-50.6) | 20.5<br>(17.6-23.8) | 52.7<br>(49.9-55.4) | 21.9<br>(18.6-25.8) | 55.9<br>(53.1-58.7) |
| <b>Kyrgyzstan</b>          | 17.5<br>(14.7-20.7) | 47.3<br>(44.6-50.1) | 14.6<br>(12.0-17.5) | 43.3<br>(40.7-45.8) | 19.3<br>(16.2-22.5) | 50.1<br>(47.1-52.8) | 16.0<br>(13.3-19.1) | 45.4<br>(43.0-47.7) | 18.5<br>(15.6-21.5) | 49.0<br>(46.2-51.9) | 16.8<br>(14.2-19.5) | 46.6<br>(44.6-48.4) | 19.7<br>(16.6-23.1) | 50.9<br>(47.9-53.6) | 19.1<br>(15.8-22.6) | 50.0<br>(47.2-52.8) |
| <b>Mongolia</b>            | 14.0<br>(11.5-16.4) | 36.9<br>(34.4-39.8) | 18.9<br>(15.6-22.5) | 48.0<br>(45.2-50.9) | 13.2<br>(11.1-15.8) | 35.3<br>(33.0-38.1) | 18.1<br>(15.1-21.6) | 46.7<br>(43.9-49.6) | 13.5<br>(11.5-15.7) | 35.9<br>(33.6-38.3) | 18.0<br>(15.4-20.7) | 47.9<br>(45.3-50.4) | 15.5<br>(13.1-18.2) | 44.3<br>(42.0-46.7) | 18.9<br>(15.9-22.2) | 53.8<br>(51.3-56.2) |
| <b>Tajikistan</b>          | 11.9<br>(9.8-14.3)  | 37.0<br>(34.4-39.6) | 12.6<br>(10.3-15.2) | 27.7<br>(25.2-30.1) | 13.1<br>(10.9-15.6) | 39.3<br>(36.8-42.2) | 13.8<br>(11.2-16.6) | 29.8<br>(27.2-32.3) | 13.1<br>(10.9-15.4) | 38.9<br>(36.4-41.7) | 12.9<br>(10.5-15.5) | 35.1<br>(32.4-37.7) | 13.0<br>(11.0-15.3) | 39.6<br>(37.1-42.4) | 13.3<br>(10.8-15.7) | 41.8<br>(39.5-44.2) |
| <b>Turkmenistan</b>        | 15.2<br>(12.6-18.0) | 43.4<br>(40.5-46.1) | 17.8<br>(14.8-21.0) | 44.6<br>(41.7-47.5) | 17.1<br>(14.4-20.2) | 46.7<br>(43.8-49.3) | 19.8<br>(16.5-23.6) | 47.6<br>(44.8-50.4) | 18.3<br>(15.4-21.6) | 48.4<br>(45.7-51.3) | 21.0<br>(17.5-24.7) | 49.6<br>(46.7-52.6) | 21.5<br>(18.2-25.1) | 53.2<br>(50.4-56.0) | 24.2<br>(20.4-28.4) | 53.7<br>(50.7-56.7) |
| <b>Uzbekistan</b>          | 19.9<br>(16.8-23.1) | 43.9<br>(41.0-46.8) | 18.4<br>(15.1-21.9) | 39.0<br>(36.5-41.7) | 22.0<br>(19.0-25.4) | 46.9<br>(44.2-49.5) | 20.2<br>(17.0-23.5) | 41.1<br>(38.6-43.4) | 19.0<br>(16.4-21.9) | 45.4<br>(43.4-47.3) | 18.9<br>(16.0-22.0) | 42.3<br>(40.5-44.3) | 20.2<br>(17.3-23.5) | 49.2<br>(46.6-51.9) | 20.6<br>(17.1-24.3) | 46.6<br>(43.8-49.2) |
| <b>Central Europe</b>      | 17.2<br>(16.1-18.3) | 58.1<br>(57.0-59.2) | 16.7<br>(15.6-17.9) | 47.8<br>(46.8-48.9) | 17.6<br>(16.5-18.7) | 58.2<br>(57.1-59.2) | 16.8<br>(15.8-18.0) | 47.6<br>(46.6-48.7) | 19.1<br>(18.0-20.3) | 59.4<br>(58.3-60.6) | 18.1<br>(17.0-19.2) | 48.3<br>(47.2-49.3) | 21.3<br>(20.0-22.7) | 62.2<br>(61.1-63.3) | 20.3<br>(18.9-21.6) | 50.4<br>(49.2-51.5) |

| Country/Region                | Males, 1980         |                     | Females, 1980       |                     | Males, 1990         |                     | Females, 1990       |                     | Males, 2000         |                     | Females, 2000       |                     | Males, 2013         |                     | Females, 2013       |                     |
|-------------------------------|---------------------|---------------------|---------------------|---------------------|---------------------|---------------------|---------------------|---------------------|---------------------|---------------------|---------------------|---------------------|---------------------|---------------------|---------------------|---------------------|
|                               | <20                 | >20                 | <20                 | >20                 | <20                 | >20                 | <20                 | >20                 | <20                 | >20                 | <20                 | >20                 | <20                 | >20                 | <20                 | >20                 |
| <b>Albania</b>                | 31.5<br>(27.4-35.9) | 46.6<br>(43.6-49.7) | 28.5<br>(24.2-32.7) | 37.9<br>(35.0-40.8) | 32.3<br>(27.7-36.5) | 46.8<br>(43.9-49.8) | 29.0<br>(25.0-32.9) | 37.9<br>(35.2-40.8) | 33.7<br>(30.1-37.9) | 50.3<br>(47.9-53.0) | 29.0<br>(25.6-32.5) | 40.5<br>(38.1-42.9) | 32.8<br>(28.5-37.3) | 56.2<br>(53.6-58.7) | 26.7<br>(22.9-30.5) | 45.8<br>(43.3-48.5) |
| <b>Bosnia and Herzegovina</b> | 11.2<br>(9.2-13.2)  | 47.6<br>(44.9-50.3) | 15.5<br>(12.8-18.6) | 44.3<br>(41.6-46.9) | 12.1<br>(10.0-14.4) | 49.5<br>(46.7-52.3) | 16.5<br>(13.7-19.8) | 45.8<br>(43.2-48.4) | 14.6<br>(12.4-16.8) | 53.6<br>(50.8-56.2) | 19.4<br>(16.3-22.7) | 49.1<br>(46.6-51.7) | 17.2<br>(14.7-20.1) | 57.3<br>(54.5-60.2) | 22.7<br>(19.2-26.3) | 51.9<br>(49.2-54.7) |
| <b>Bulgaria</b>               | 33.1<br>(28.9-37.5) | 68.0<br>(65.4-70.4) | 32.5<br>(27.9-37.6) | 56.0<br>(53.4-58.8) | 29.5<br>(25.5-33.9) | 64.1<br>(61.5-66.6) | 29.2<br>(24.9-34.0) | 52.4<br>(49.4-55.4) | 25.6<br>(21.8-29.5) | 58.9<br>(56.1-61.4) | 25.4<br>(21.7-29.2) | 47.9<br>(45.1-50.5) | 26.7<br>(22.9-30.8) | 59.7<br>(56.9-62.2) | 25.7<br>(21.9-29.9) | 48.8<br>(46.1-51.7) |
| <b>Croatia</b>                | 22.9<br>(19.4-26.6) | 53.1<br>(50.3-55.8) | 11.6<br>(9.5-14.2)  | 41.6<br>(38.9-44.4) | 24.6<br>(20.8-28.6) | 54.9<br>(52.2-57.6) | 12.4<br>(10.1-14.8) | 43.1<br>(40.4-45.7) | 27.0<br>(23.2-31.0) | 59.4<br>(56.7-62.0) | 15.1<br>(12.6-17.8) | 46.4<br>(44.0-48.8) | 29.5<br>(25.3-33.8) | 65.5<br>(62.9-68.2) | 19.7<br>(16.5-23.1) | 51.0<br>(48.3-53.7) |
| <b>Czech Republic</b>         | 20.3<br>(17.3-23.7) | 60.1<br>(57.5-62.8) | 18.2<br>(15.2-21.6) | 51.4<br>(48.6-54.1) | 21.1<br>(17.9-24.6) | 61.1<br>(58.4-63.5) | 18.8<br>(15.9-22.1) | 51.9<br>(49.0-54.9) | 21.7<br>(18.5-25.4) | 63.0<br>(60.4-65.6) | 18.5<br>(15.3-21.9) | 50.4<br>(47.8-53.2) | 22.3<br>(19.1-26.3) | 65.5<br>(62.9-68.2) | 18.0<br>(15.0-21.0) | 50.0<br>(47.2-52.7) |
| <b>Hungary</b>                | 26.1<br>(22.2-30.1) | 64.6<br>(61.8-67.0) | 22.6<br>(18.9-26.5) | 55.1<br>(52.3-57.9) | 28.0<br>(23.8-32.2) | 66.0<br>(63.5-68.5) | 23.7<br>(20.0-27.2) | 56.3<br>(53.4-59.3) | 27.3<br>(23.4-31.4) | 63.6<br>(61.1-66.4) | 23.0<br>(19.4-27.1) | 53.8<br>(51.0-56.5) | 30.2<br>(26.3-34.4) | 65.6<br>(63.0-68.1) | 24.9<br>(21.3-28.6) | 54.8<br>(52.0-57.5) |
| <b>Macedonia</b>              | 17.3<br>(14.6-20.2) | 44.2<br>(41.5-47.2) | 16.6<br>(13.7-19.7) | 44.0<br>(41.3-46.7) | 18.8<br>(15.7-22.2) | 46.4<br>(43.5-49.4) | 17.7<br>(14.6-21.1) | 45.5<br>(42.8-48.2) | 22.4<br>(19.1-26.0) | 52.1<br>(49.4-54.8) | 20.6<br>(17.6-24.2) | 49.0<br>(46.3-51.8) | 23.7<br>(20.5-27.2) | 57.0<br>(54.2-59.9) | 22.3<br>(19.1-25.9) | 51.7<br>(49.0-54.3) |
| <b>Montenegro</b>             | 19.3<br>(16.1-22.5) | 51.6<br>(48.4-54.6) | 20.9<br>(17.5-24.8) | 49.9<br>(46.9-52.9) | 21.2<br>(17.7-24.5) | 53.9<br>(50.9-56.7) | 22.6<br>(19.2-26.6) | 52.0<br>(49.0-54.9) | 23.6<br>(20.3-27.4) | 56.6<br>(53.6-59.5) | 24.6<br>(20.9-28.6) | 54.2<br>(51.3-57.1) | 26.3<br>(22.7-30.2) | 60.1<br>(57.1-62.9) | 27.3<br>(23.1-31.4) | 57.0<br>(54.1-60.1) |
| <b>Poland</b>                 | 17.2<br>(14.4-20.0) | 61.1<br>(58.5-63.6) | 13.6<br>(11.3-16.5) | 47.3<br>(44.7-49.9) | 17.6<br>(14.9-20.7) | 61.0<br>(58.2-63.7) | 14.1<br>(11.6-16.7) | 46.7<br>(44.1-49.3) | 19.8<br>(17.0-22.7) | 62.3<br>(59.6-64.9) | 15.6<br>(13.2-18.2) | 47.6<br>(45.0-50.3) | 21.9<br>(18.6-25.7) | 64.0<br>(61.4-66.7) | 17.8<br>(14.7-21.3) | 49.4<br>(46.8-52.1) |
| <b>Romania</b>                | 8.1<br>(6.7-9.8)    | 54.0<br>(51.3-56.7) | 16.0<br>(13.4-19.1) | 45.1<br>(42.3-48.0) | 7.8<br>(6.5-9.4)    | 52.8<br>(50.3-55.5) | 15.6<br>(12.9-18.3) | 44.1<br>(41.5-46.7) | 9.0<br>(7.5-10.8)   | 55.8<br>(53.2-58.4) | 17.4<br>(14.4-20.7) | 46.4<br>(43.7-49.1) | 11.0<br>(9.2-13.2)  | 60.4<br>(57.6-63.0) | 20.3<br>(17.1-24.2) | 50.3<br>(47.6-53.0) |
| <b>Serbia</b>                 | 8.2<br>(6.7-9.7)    | 47.6<br>(44.7-50.3) | 10.5<br>(8.6-12.8)  | 43.3<br>(40.7-46.1) | 9.0<br>(7.5-10.6)   | 49.8<br>(47.0-52.6) | 11.3<br>(9.3-13.6)  | 45.3<br>(42.5-48.0) | 13.1<br>(11.0-15.4) | 52.5<br>(50.1-54.8) | 16.0<br>(13.4-19.1) | 47.8<br>(45.4-50.3) | 19.2<br>(16.5-22.5) | 55.7<br>(53.5-58.2) | 23.1<br>(19.8-26.7) | 50.4<br>(47.8-52.8) |
| <b>Slovakia</b>               | 14.2<br>(11.8-16.9) | 58.6<br>(55.9-61.3) | 10.3<br>(8.4-12.5)  | 47.4<br>(44.8-50.1) | 16.4<br>(13.8-19.4) | 61.9<br>(59.2-64.5) | 11.6<br>(9.5-14.0)  | 49.9<br>(47.1-52.5) | 18.0<br>(15.0-21.0) | 63.0<br>(60.1-65.8) | 12.4<br>(10.2-15.0) | 50.3<br>(47.9-53.0) | 20.6<br>(17.5-23.8) | 64.4<br>(61.8-66.9) | 13.5<br>(11.0-16.4) | 51.5<br>(48.9-54.1) |
| <b>Slovenia</b>               | 24.4<br>(20.8-28.4) | 57.1<br>(54.4-59.7) | 14.1<br>(11.6-16.9) | 44.6<br>(42.0-47.5) | 26.2<br>(22.5-30.5) | 58.9<br>(56.3-61.6) | 14.6<br>(13.1-16.2) | 46.1<br>(43.4-49.0) | 29.6<br>(25.3-33.8) | 62.1<br>(59.3-64.7) | 18.1<br>(16.7-19.8) | 49.4<br>(46.7-52.0) | 33.1<br>(29.4-36.9) | 65.1<br>(62.3-67.6) | 24.0<br>(20.7-27.3) | 52.1<br>(49.1-54.8) |
| <b>Central Latin America</b>  | 18.5<br>(16.5-20.5) | 42.4<br>(40.8-44.0) | 19.0<br>(17.2-21.1) | 50.6<br>(48.9-52.2) | 19.4<br>(17.5-21.6) | 45.6<br>(44.0-47.2) | 19.5<br>(17.8-21.3) | 52.8<br>(51.5-54.1) | 19.3<br>(17.9-20.9) | 51.0<br>(49.8-52.2) | 22.6<br>(21.1-24.0) | 60.7<br>(59.8-61.6) | 21.7<br>(20.1-23.3) | 57.1<br>(56.0-58.2) | 25.5<br>(23.7-27.3) | 65.2<br>(64.1-66.2) |

| Country/Region                          | Males, 1980         |                     | Females, 1980       |                     | Males, 1990         |                     | Females, 1990       |                     | Males, 2000         |                     | Females, 2000       |                     | Males, 2013         |                     | Females, 2013       |                     |
|-----------------------------------------|---------------------|---------------------|---------------------|---------------------|---------------------|---------------------|---------------------|---------------------|---------------------|---------------------|---------------------|---------------------|---------------------|---------------------|---------------------|---------------------|
|                                         | <20                 | >20                 | <20                 | >20                 | <20                 | >20                 | <20                 | >20                 | <20                 | >20                 | <20                 | >20                 | <20                 | >20                 | <20                 | >20                 |
| <b>Colombia</b>                         | 10.3<br>(8.5-12.2)  | 32.3<br>(29.8-34.8) | 15.6<br>(12.9-18.5) | 46.7<br>(43.6-49.7) | 11.2<br>(9.3-13.3)  | 36.1<br>(33.3-38.8) | 17.4<br>(14.6-20.7) | 49.8<br>(47.3-52.5) | 13.3<br>(11.2-15.8) | 43.9<br>(41.4-46.8) | 18.3<br>(15.6-21.3) | 53.9<br>(52.1-55.9) | 15.4<br>(13.1-18.0) | 52.7<br>(50.4-54.9) | 18.3<br>(15.4-21.6) | 57.0<br>(54.9-59.2) |
| <b>Costa Rica</b>                       | 15.1<br>(12.7-17.6) | 44.5<br>(42.0-47.2) | 29.7<br>(25.1-34.6) | 57.0<br>(53.8-59.6) | 17.8<br>(14.9-21.0) | 50.2<br>(47.3-53.0) | 33.4<br>(28.6-38.7) | 61.7<br>(58.7-64.7) | 19.2<br>(16.2-22.4) | 53.0<br>(50.4-55.8) | 35.5<br>(30.9-40.5) | 64.2<br>(61.5-66.9) | 20.8<br>(17.6-24.4) | 55.2<br>(52.5-58.2) | 37.7<br>(32.5-42.9) | 66.5<br>(63.6-69.2) |
| <b>El Salvador</b>                      | 8.2<br>(6.7-9.9)    | 26.5<br>(24.3-28.8) | 18.7<br>(15.8-22.3) | 54.1<br>(51.1-57.1) | 9.4<br>(7.8-11.0)   | 29.9<br>(27.5-32.6) | 21.1<br>(17.8-24.7) | 57.8<br>(54.8-60.8) | 10.2<br>(8.6-12.1)  | 33.2<br>(30.7-35.9) | 24.8<br>(21.6-28.4) | 64.2<br>(62.1-66.4) | 11.2<br>(9.3-13.3)  | 35.7<br>(33.0-38.4) | 25.4<br>(22.0-29.1) | 71.0<br>(68.7-73.1) |
| <b>Guatemala</b>                        | 11.9<br>(9.9-14.1)  | 31.9<br>(29.4-34.6) | 15.8<br>(12.9-18.8) | 43.3<br>(40.3-46.6) | 13.1<br>(11.1-15.4) | 34.7<br>(32.2-37.4) | 16.7<br>(14.1-19.4) | 44.7<br>(42.0-47.5) | 13.3<br>(12.1-14.7) | 35.0<br>(33.4-36.5) | 17.4<br>(16.0-19.1) | 49.0<br>(47.5-50.7) | 13.6<br>(11.4-16.2) | 41.4<br>(38.8-44.0) | 19.4<br>(16.5-22.8) | 54.5<br>(51.8-57.2) |
| <b>Honduras</b>                         | 6.6<br>(5.4-7.8)    | 22.1<br>(20.1-24.2) | 15.8<br>(12.9-18.8) | 45.8<br>(42.7-48.9) | 7.6<br>(6.3-9.3)    | 25.8<br>(23.6-28.3) | 17.7<br>(14.6-20.8) | 49.5<br>(46.4-52.7) | 9.1<br>(7.6-10.9)   | 30.6<br>(28.2-33.2) | 19.8<br>(17.0-23.0) | 55.3<br>(53.0-57.4) | 11.4<br>(9.5-13.5)  | 35.9<br>(33.3-38.6) | 21.5<br>(18.2-24.8) | 66.0<br>(64.0-67.9) |
| <b>Mexico</b>                           | 25.1<br>(21.2-28.8) | 51.7<br>(48.9-54.5) | 20.1<br>(16.9-23.8) | 53.6<br>(50.8-56.5) | 26.5<br>(22.8-30.6) | 55.7<br>(52.8-58.6) | 20.4<br>(17.4-23.7) | 56.1<br>(53.9-58.3) | 25.8<br>(23.1-28.8) | 61.7<br>(59.8-63.6) | 25.2<br>(22.8-27.5) | 67.4<br>(66.0-68.8) | 28.4<br>(25.3-31.6) | 66.8<br>(64.9-68.6) | 29.3<br>(25.8-32.5) | 71.4<br>(69.5-73.2) |
| <b>Nicaragua</b>                        | 12.6<br>(10.5-15.0) | 36.1<br>(33.5-38.8) | 18.1<br>(15.2-21.4) | 54.4<br>(51.6-57.2) | 13.0<br>(11.0-15.3) | 37.6<br>(34.9-40.3) | 19.0<br>(15.9-22.4) | 56.0<br>(53.2-58.8) | 13.7<br>(11.5-16.1) | 39.5<br>(37.0-42.2) | 21.4<br>(18.5-24.6) | 62.4<br>(60.9-64.0) | 14.8<br>(12.4-17.5) | 43.0<br>(40.3-45.8) | 23.4<br>(19.9-27.1) | 67.6<br>(65.3-69.9) |
| <b>Panama</b>                           | 5.2<br>(4.2-6.3)    | 6.3<br>(5.6-7.0)    | 5.8<br>(4.6-7.1)    | 12.1<br>(10.8-13.3) | 6.9<br>(5.6-8.4)    | 8.3<br>(7.5-9.2)    | 6.8<br>(5.5-8.3)    | 15.1<br>(13.5-16.6) | 8.6<br>(7.1-10.4)   | 17.5<br>(15.9-19.2) | 8.1<br>(6.7-9.9)    | 26.4<br>(24.4-28.8) | 10.6<br>(8.9-12.6)  | 21.4<br>(19.5-23.5) | 9.9<br>(8.1-12.0)   | 30.9<br>(28.4-33.5) |
| <b>Venezuela</b>                        | 13.8<br>(11.5-16.6) | 38.7<br>(35.9-41.5) | 22.1<br>(18.7-25.9) | 50.4<br>(47.4-53.5) | 13.1<br>(10.8-15.6) | 38.4<br>(35.6-41.2) | 21.1<br>(17.4-25.0) | 49.7<br>(46.6-53.0) | 13.4<br>(11.0-15.9) | 39.6<br>(36.9-42.3) | 21.6<br>(17.9-25.3) | 50.7<br>(47.7-53.9) | 18.4<br>(15.5-21.6) | 48.7<br>(45.7-51.5) | 27.7<br>(23.7-31.9) | 58.4<br>(55.6-61.4) |
| <b>Central Sub-Saharan Africa</b>       | 10.9<br>(9.5-12.4)  | 23.2<br>(22.1-24.3) | 14.7<br>(12.9-16.5) | 20.9<br>(19.8-22.1) | 10.6<br>(9.3-12.0)  | 22.6<br>(21.5-23.8) | 14.4<br>(12.7-16.4) | 20.7<br>(19.7-21.9) | 10.8<br>(9.8-12.1)  | 23.2<br>(22.1-24.4) | 14.9<br>(13.2-16.6) | 22.7<br>(21.5-23.9) | 10.3<br>(9.2-11.6)  | 24.8<br>(23.7-26.1) | 14.6<br>(12.9-16.3) | 25.7<br>(24.4-27.1) |
| <b>Angola</b>                           | 12.8<br>(10.5-15.2) | 36.4<br>(33.8-39.2) | 17.2<br>(14.3-20.7) | 41.4<br>(38.7-44.3) | 11.4<br>(9.5-13.7)  | 33.7<br>(31.1-36.1) | 15.8<br>(12.9-19.0) | 39.1<br>(36.3-41.9) | 12.6<br>(10.7-14.6) | 36.5<br>(33.8-39.1) | 17.2<br>(14.6-20.2) | 42.6<br>(39.7-45.6) | 15.5<br>(13.0-18.3) | 42.9<br>(40.1-45.7) | 20.9<br>(17.5-24.6) | 49.1<br>(46.1-52.0) |
| <b>Central African Republic</b>         | 15.8<br>(13.2-18.7) | 42.4<br>(39.6-45.3) | 13.4<br>(10.9-16.0) | 9.8<br>(8.8-11.0)   | 13.3<br>(11.1-15.7) | 37.7<br>(35.0-40.5) | 11.4<br>(9.3-13.6)  | 8.2<br>(7.3-9.2)    | 12.8<br>(10.9-15.2) | 36.1<br>(33.7-38.8) | 12.8<br>(10.8-15.1) | 8.6<br>(7.6-9.6)    | 10.2<br>(8.5-12.0)  | 33.7<br>(31.2-36.3) | 11.2<br>(9.1-13.6)  | 10.1<br>(9.0-11.3)  |
| <b>Congo</b>                            | 13.9<br>(11.5-16.4) | 38.5<br>(35.9-41.5) | 15.0<br>(12.5-18.0) | 34.9<br>(32.4-37.9) | 14.0<br>(11.8-16.8) | 38.9<br>(36.2-41.5) | 15.3<br>(12.7-18.2) | 35.4<br>(32.5-38.1) | 12.3<br>(10.3-14.8) | 35.8<br>(33.4-38.5) | 15.0<br>(12.6-17.7) | 37.7<br>(35.3-40.0) | 8.9<br>(7.4-10.7)   | 29.2<br>(27.0-31.6) | 11.2<br>(9.3-13.2)  | 37.9<br>(35.7-40.2) |
| <b>Democratic Republic of the Congo</b> | 9.6<br>(7.8-11.7)   | 15.7<br>(14.2-17.2) | 13.9<br>(11.4-16.5) | 14.5<br>(13.1-16.0) | 9.8<br>(8.1-11.8)   | 15.9<br>(14.4-17.5) | 14.0<br>(11.6-16.9) | 14.8<br>(13.3-16.4) | 9.8<br>(8.4-11.5)   | 16.4<br>(14.9-17.9) | 14.1<br>(11.9-16.6) | 16.1<br>(14.6-17.7) | 8.5<br>(7.0-10.2)   | 17.5<br>(15.9-19.2) | 12.6<br>(10.5-15.0) | 17.7<br>(16.1-19.5) |

| Country/Region                    | Males, 1980         |                     | Females, 1980       |                     | Males, 1990         |                     | Females, 1990       |                     | Males, 2000         |                     | Females, 2000       |                     | Males, 2013         |                     | Females, 2013       |                     |
|-----------------------------------|---------------------|---------------------|---------------------|---------------------|---------------------|---------------------|---------------------|---------------------|---------------------|---------------------|---------------------|---------------------|---------------------|---------------------|---------------------|---------------------|
|                                   | <20                 | >20                 | <20                 | >20                 | <20                 | >20                 | <20                 | >20                 | <20                 | >20                 | <20                 | >20                 | <20                 | >20                 | <20                 | >20                 |
| <b>Equatorial Guinea</b>          | 23.4<br>(20.0-27.0) | 53.8<br>(51.1-56.6) | 28.9<br>(24.5-33.5) | 57.0<br>(54.1-60.0) | 23.9<br>(20.6-27.6) | 54.5<br>(51.9-57.3) | 29.6<br>(25.4-34.3) | 57.8<br>(54.9-60.8) | 25.4<br>(22.1-29.0) | 56.6<br>(53.7-59.4) | 31.2<br>(27.1-35.5) | 60.4<br>(57.5-63.5) | 27.2<br>(23.3-31.3) | 59.6<br>(56.8-62.4) | 33.2<br>(28.9-38.0) | 63.4<br>(60.6-66.2) |
| <b>Gabon</b>                      | 10.2<br>(8.3-12.3)  | 36.7<br>(34.1-39.4) | 14.2<br>(11.8-17.1) | 38.9<br>(36.3-41.8) | 10.8<br>(9.0-13.0)  | 38.3<br>(35.7-41.1) | 15.0<br>(12.2-18.1) | 40.4<br>(37.7-43.3) | 11.8<br>(9.9-13.7)  | 40.0<br>(37.5-42.7) | 16.9<br>(14.3-19.9) | 48.1<br>(45.7-50.5) | 13.3<br>(11.4-15.4) | 42.1<br>(39.8-44.5) | 20.1<br>(17.1-23.4) | 59.6<br>(57.5-61.7) |
| <b>East Asia</b>                  | 7.0<br>(5.8-8.4)    | 9.8<br>(8.8-10.9)   | 4.5<br>(3.7-5.5)    | 13.0<br>(11.8-14.4) | 10.0<br>(8.7-11.5)  | 11.8<br>(11.1-12.5) | 8.2<br>(7.1-9.4)    | 14.8<br>(14.1-15.6) | 15.5<br>(13.6-17.6) | 20.2<br>(19.1-21.2) | 10.7<br>(9.3-12.2)  | 22.3<br>(21.4-23.1) | 22.6<br>(19.8-25.6) | 28.0<br>(26.2-29.7) | 13.7<br>(11.8-15.8) | 27.1<br>(25.5-28.7) |
| <b>China</b>                      | 6.9<br>(5.7-8.4)    | 9.6<br>(8.6-10.8)   | 4.5<br>(3.6-5.5)    | 13.0<br>(11.8-14.4) | 9.9<br>(8.6-11.5)   | 11.7<br>(11.0-12.3) | 8.2<br>(7.0-9.4)    | 14.9<br>(14.1-15.7) | 15.6<br>(13.7-17.7) | 20.2<br>(19.2-21.3) | 10.8<br>(9.3-12.3)  | 22.5<br>(21.6-23.4) | 23.0<br>(20.1-26.1) | 28.3<br>(26.4-30.0) | 14.0<br>(12.0-16.1) | 27.4<br>(25.8-29.0) |
| <b>North Korea</b>                | 1.0<br>(0.8-1.2)    | 4.0<br>(3.5-4.5)    | 0.9<br>(0.7-1.1)    | 4.7<br>(4.1-5.3)    | 1.1<br>(0.9-1.3)    | 4.3<br>(3.8-4.8)    | 1.0<br>(0.8-1.2)    | 5.0<br>(4.4-5.6)    | 1.0<br>(0.8-1.3)    | 4.1<br>(3.7-4.6)    | 1.0<br>(0.8-1.2)    | 4.7<br>(4.1-5.4)    | 1.0<br>(0.8-1.3)    | 4.1<br>(3.7-4.6)    | 1.0<br>(0.8-1.2)    | 4.7<br>(4.2-5.2)    |
| <b>Taiwan (Province of China)</b> | 17.0<br>(14.2-20.0) | 23.2<br>(21.2-25.4) | 11.4<br>(9.5-13.6)  | 22.5<br>(20.6-24.7) | 20.6<br>(18.3-22.9) | 26.3<br>(24.1-28.7) | 13.7<br>(12.2-15.5) | 25.2<br>(23.0-27.4) | 22.7<br>(20.8-24.8) | 29.9<br>(28.5-31.2) | 15.5<br>(14.1-17.1) | 27.4<br>(26.1-28.9) | 25.9<br>(22.3-29.9) | 33.8<br>(31.3-36.4) | 17.4<br>(14.5-20.7) | 30.9<br>(28.4-33.4) |
| <b>Eastern Europe</b>             | 13.0<br>(11.4-14.8) | 43.5<br>(41.5-45.3) | 14.8<br>(12.9-16.6) | 51.5<br>(49.6-53.4) | 15.1<br>(13.8-16.5) | 45.7<br>(44.4-46.9) | 16.9<br>(15.5-18.5) | 53.8<br>(52.4-55.0) | 16.7<br>(15.1-18.4) | 49.1<br>(48.1-50.1) | 16.8<br>(15.2-18.6) | 57.4<br>(56.5-58.4) | 19.0<br>(16.7-21.4) | 55.0<br>(52.8-56.9) | 18.8<br>(16.5-21.2) | 57.8<br>(55.9-59.7) |
| <b>Belarus</b>                    | 12.3<br>(10.1-14.5) | 37.6<br>(34.9-40.3) | 14.3<br>(11.8-17.1) | 39.7<br>(36.9-42.5) | 13.7<br>(11.4-16.3) | 40.5<br>(37.7-43.3) | 15.8<br>(12.9-18.8) | 42.1<br>(39.3-44.9) | 13.6<br>(11.4-16.0) | 40.6<br>(38.0-43.4) | 15.7<br>(13.0-18.5) | 42.0<br>(39.0-45.1) | 15.4<br>(12.9-18.5) | 44.1<br>(41.2-46.8) | 17.4<br>(14.4-20.5) | 44.7<br>(41.9-47.6) |
| <b>Estonia</b>                    | 14.0<br>(11.5-16.6) | 49.3<br>(46.5-52.1) | 19.5<br>(16.2-23.1) | 50.1<br>(47.3-52.8) | 15.0<br>(12.7-17.7) | 50.6<br>(47.6-53.3) | 20.0<br>(16.7-23.8) | 50.7<br>(48.0-53.3) | 20.2<br>(16.9-23.3) | 54.5<br>(51.8-57.3) | 20.2<br>(16.9-23.8) | 52.0<br>(49.5-54.5) | 24.0<br>(20.2-27.8) | 59.3<br>(56.5-62.0) | 21.4<br>(18.0-25.2) | 54.3<br>(51.5-57.2) |
| <b>Latvia</b>                     | 16.3<br>(13.7-19.4) | 51.6<br>(48.6-54.4) | 13.4<br>(10.9-15.9) | 54.5<br>(51.7-57.2) | 18.5<br>(15.5-21.9) | 54.8<br>(52.0-57.5) | 14.8<br>(12.2-17.7) | 56.8<br>(54.2-59.4) | 18.3<br>(15.5-21.3) | 53.6<br>(50.8-56.4) | 14.0<br>(11.4-16.6) | 54.9<br>(52.3-57.4) | 19.9<br>(16.8-23.2) | 56.3<br>(53.6-59.1) | 15.2<br>(12.6-18.1) | 55.8<br>(53.2-58.6) |
| <b>Lithuania</b>                  | 16.2<br>(13.5-19.2) | 48.0<br>(45.5-51.0) | 13.3<br>(11.1-15.9) | 46.0<br>(43.2-48.8) | 18.5<br>(15.5-21.7) | 51.8<br>(49.0-54.5) | 15.0<br>(12.4-17.7) | 49.0<br>(46.5-51.9) | 21.4<br>(18.3-24.9) | 57.9<br>(54.9-60.7) | 17.8<br>(15.0-21.1) | 52.9<br>(50.2-55.7) | 24.3<br>(20.8-28.1) | 63.9<br>(61.1-66.6) | 21.1<br>(17.8-24.6) | 56.2<br>(53.3-59.0) |
| <b>Moldova</b>                    | 11.9<br>(10.0-14.1) | 37.0<br>(34.3-39.7) | 12.0<br>(9.9-14.2)  | 53.1<br>(50.4-55.6) | 13.1<br>(10.8-15.5) | 39.5<br>(36.8-42.1) | 13.0<br>(10.7-15.6) | 55.1<br>(52.5-57.8) | 13.7<br>(11.5-16.0) | 40.5<br>(37.8-43.4) | 13.4<br>(11.1-15.9) | 56.2<br>(54.0-58.3) | 15.8<br>(13.2-18.6) | 44.7<br>(41.9-47.5) | 15.2<br>(12.7-18.1) | 58.8<br>(56.4-61.1) |
| <b>Russia</b>                     | 14.7<br>(12.3-17.3) | 40.4<br>(37.7-43.1) | 14.3<br>(11.9-16.9) | 52.2<br>(49.6-54.9) | 17.1<br>(15.2-19.1) | 42.4<br>(40.6-44.0) | 16.8<br>(14.9-18.9) | 54.3<br>(52.7-55.8) | 19.4<br>(17.1-21.8) | 47.4<br>(46.3-48.6) | 16.7<br>(14.5-19.3) | 59.7<br>(58.6-60.8) | 21.7<br>(18.5-25.0) | 54.3<br>(51.5-57.1) | 18.6<br>(15.5-21.9) | 58.9<br>(56.3-61.4) |
| <b>Ukraine</b>                    | 8.0<br>(6.6-9.8)    | 52.1<br>(49.1-54.7) | 16.3<br>(13.5-19.4) | 52.1<br>(49.3-55.0) | 9.2<br>(7.6-11.0)   | 55.2<br>(52.3-58.0) | 18.1<br>(14.9-21.4) | 54.7<br>(52.0-57.6) | 9.1<br>(7.5-10.9)   | 55.1<br>(52.3-57.9) | 17.9<br>(14.9-21.2) | 54.5<br>(51.7-57.4) | 10.6<br>(8.8-12.6)  | 59.1<br>(56.3-61.8) | 20.1<br>(16.8-23.8) | 57.4<br>(54.3-60.2) |

| Country/Region                    | Males, 1980         |                     | Females, 1980       |                     | Males, 1990         |                     | Females, 1990       |                     | Males, 2000         |                     | Females, 2000       |                     | Males, 2013         |                     | Females, 2013       |                     |
|-----------------------------------|---------------------|---------------------|---------------------|---------------------|---------------------|---------------------|---------------------|---------------------|---------------------|---------------------|---------------------|---------------------|---------------------|---------------------|---------------------|---------------------|
|                                   | <20                 | >20                 | <20                 | >20                 | <20                 | >20                 | <20                 | >20                 | <20                 | >20                 | <20                 | >20                 | <20                 | >20                 | <20                 | >20                 |
| <b>Eastern Sub-Saharan Africa</b> | 9.4<br>(8.8-10.0)   | 14.8<br>(14.3-15.2) | 10.7<br>(10.0-11.3) | 16.2<br>(15.7-16.7) | 8.9<br>(8.4-9.4)    | 14.3<br>(13.9-14.8) | 10.3<br>(9.8-10.9)  | 15.7<br>(15.3-16.2) | 8.4<br>(8.0-8.9)    | 14.0<br>(13.6-14.5) | 10.9<br>(10.3-11.5) | 19.0<br>(18.5-19.4) | 8.4<br>(7.9-8.9)    | 14.9<br>(14.4-15.4) | 12.0<br>(11.3-12.7) | 23.7<br>(23.2-24.3) |
| <b>Burundi</b>                    | 4.9<br>(4.0-5.9)    | 17.3<br>(15.7-19.1) | 6.3<br>(5.2-7.7)    | 11.7<br>(10.5-13.1) | 4.7<br>(3.8-5.7)    | 16.8<br>(15.3-18.4) | 6.1<br>(4.9-7.6)    | 11.0<br>(9.8-12.3)  | 5.6<br>(4.7-6.7)    | 19.7<br>(17.9-21.6) | 7.6<br>(6.2-9.3)    | 10.3<br>(9.3-11.5)  | 7.0<br>(5.9-8.3)    | 23.0<br>(20.9-25.1) | 9.3<br>(7.7-10.9)   | 10.3<br>(9.3-11.3)  |
| <b>Comoros</b>                    | 16.1<br>(13.4-18.9) | 24.9<br>(22.8-27.2) | 19.0<br>(15.9-22.7) | 33.6<br>(31.4-36.0) | 17.3<br>(14.7-20.2) | 26.3<br>(24.0-28.7) | 20.2<br>(16.9-23.6) | 35.2<br>(33.0-37.5) | 21.4<br>(18.7-24.3) | 25.2<br>(22.9-27.4) | 23.6<br>(20.3-27.2) | 40.6<br>(38.3-42.9) | 19.0<br>(16.2-22.2) | 25.6<br>(23.5-27.9) | 23.9<br>(20.4-27.9) | 48.5<br>(45.9-51.1) |
| <b>Djibouti</b>                   | 5.8<br>(4.6-7.3)    | 9.8<br>(8.7-10.9)   | 15.5<br>(12.8-18.3) | 40.3<br>(37.3-43.1) | 6.1<br>(4.8-7.6)    | 10.3<br>(9.3-11.5)  | 16.2<br>(13.6-19.1) | 41.4<br>(38.5-44.3) | 7.1<br>(5.8-8.6)    | 12.3<br>(11.1-13.7) | 18.8<br>(15.9-21.9) | 46.0<br>(43.0-49.1) | 9.2<br>(7.6-10.9)   | 16.3<br>(14.7-17.8) | 23.5<br>(20.0-27.4) | 53.0<br>(50.0-55.9) |
| <b>Eritrea</b>                    | 3.8<br>(3.1-4.7)    | 10.7<br>(9.5-11.8)  | 5.1<br>(4.2-6.3)    | 11.1<br>(10.0-12.2) | 3.9<br>(3.2-4.6)    | 10.9<br>(9.8-12.1)  | 5.3<br>(4.3-6.4)    | 11.3<br>(10.2-12.5) | 3.8<br>(3.1-4.5)    | 11.3<br>(10.1-12.5) | 5.4<br>(4.4-6.5)    | 13.9<br>(12.7-15.2) | 4.1<br>(3.4-5.1)    | 12.2<br>(11.0-13.6) | 6.2<br>(5.0-7.5)    | 16.4<br>(14.8-18.1) |
| <b>Ethiopia</b>                   | 3.7<br>(3.1-4.5)    | 3.0<br>(2.6-3.4)    | 4.7<br>(3.7-5.9)    | 4.4<br>(3.9-5.0)    | 3.6<br>(3.0-4.5)    | 3.0<br>(2.6-3.3)    | 4.7<br>(3.8-5.8)    | 4.4<br>(3.9-4.9)    | 4.1<br>(3.4-4.9)    | 3.4<br>(3.0-3.8)    | 5.5<br>(4.6-6.7)    | 5.3<br>(4.7-5.8)    | 4.6<br>(3.8-5.5)    | 4.0<br>(3.6-4.4)    | 6.3<br>(5.2-7.7)    | 8.0<br>(7.2-8.9)    |
| <b>Kenya</b>                      | 11.9<br>(9.8-14.4)  | 34.5<br>(31.7-37.3) | 13.3<br>(11.0-16.1) | 24.2<br>(22.0-26.3) | 10.7<br>(8.9-12.8)  | 32.0<br>(29.5-34.4) | 12.2<br>(10.1-14.5) | 22.3<br>(20.6-24.1) | 10.3<br>(8.7-12.0)  | 31.1<br>(28.5-33.6) | 13.1<br>(11.1-15.3) | 27.8<br>(25.8-29.9) | 9.4<br>(7.8-11.3)   | 30.0<br>(27.5-32.5) | 13.2<br>(11.0-15.8) | 34.1<br>(31.6-36.7) |
| <b>Madagascar</b>                 | 6.3<br>(5.2-7.6)    | 10.9<br>(9.7-12.1)  | 6.1<br>(4.8-7.5)    | 10.7<br>(9.5-11.9)  | 5.4<br>(4.5-6.5)    | 9.7<br>(8.6-10.8)   | 5.4<br>(4.4-6.6)    | 9.7<br>(8.7-10.8)   | 5.4<br>(4.5-6.5)    | 8.7<br>(8.0-9.6)    | 5.3<br>(4.3-6.6)    | 10.8<br>(9.8-11.8)  | 6.3<br>(5.2-7.6)    | 9.3<br>(8.4-10.4)   | 5.6<br>(4.5-7.0)    | 12.6<br>(11.4-14.0) |
| <b>Malawi</b>                     | 22.3<br>(18.8-26.0) | 14.0<br>(12.5-15.4) | 17.2<br>(14.2-20.4) | 16.5<br>(14.9-18.2) | 19.8<br>(17.0-22.8) | 12.3<br>(11.0-13.7) | 15.9<br>(13.3-18.5) | 14.7<br>(13.4-16.1) | 15.3<br>(13.3-17.4) | 13.6<br>(12.3-15.0) | 19.9<br>(17.0-23.0) | 18.9<br>(17.6-20.3) | 12.7<br>(10.9-14.7) | 15.6<br>(14.3-16.9) | 24.3<br>(20.9-27.9) | 25.7<br>(24.0-27.4) |
| <b>Mauritius</b>                  | 16.6<br>(13.9-19.6) | 29.8<br>(27.2-32.3) | 14.3<br>(11.9-17.0) | 36.3<br>(33.9-38.9) | 18.4<br>(15.3-21.9) | 32.5<br>(29.9-35.2) | 16.1<br>(13.2-19.2) | 38.8<br>(36.7-41.0) | 20.0<br>(17.1-23.2) | 35.2<br>(32.6-37.9) | 19.2<br>(16.1-22.8) | 44.5<br>(41.6-47.3) | 22.9<br>(19.8-26.2) | 39.4<br>(36.5-42.4) | 21.9<br>(18.4-26.0) | 49.3<br>(46.5-52.1) |
| <b>Mozambique</b>                 | 10.5<br>(8.6-12.8)  | 11.0<br>(9.8-12.1)  | 11.7<br>(9.4-14.2)  | 18.6<br>(16.9-20.5) | 10.5<br>(8.7-12.7)  | 11.0<br>(9.8-12.2)  | 11.7<br>(9.5-14.2)  | 18.5<br>(16.9-20.3) | 11.9<br>(10.2-14.0) | 12.5<br>(11.3-13.9) | 13.1<br>(11.1-15.5) | 21.9<br>(20.2-23.6) | 12.3<br>(10.4-14.4) | 14.1<br>(12.7-15.6) | 14.4<br>(12.3-16.9) | 26.5<br>(24.6-28.3) |
| <b>Rwanda</b>                     | 13.7<br>(11.3-16.3) | 5.6<br>(4.9-6.3)    | 18.3<br>(15.3-21.8) | 18.7<br>(16.8-20.7) | 11.1<br>(9.4-13.0)  | 4.5<br>(4.0-5.1)    | 15.3<br>(12.9-18.0) | 15.8<br>(14.2-17.5) | 10.8<br>(9.2-12.6)  | 4.5<br>(4.0-5.1)    | 15.9<br>(13.6-18.4) | 15.5<br>(14.4-16.8) | 11.3<br>(9.5-13.3)  | 5.4<br>(4.9-6.0)    | 18.4<br>(15.5-21.6) | 19.3<br>(17.8-21.0) |
| <b>Seychelles</b>                 | 10.4<br>(8.6-12.5)  | 27.3<br>(25.1-29.6) | 14.8<br>(12.2-17.8) | 49.0<br>(46.3-51.7) | 10.8<br>(8.9-13.1)  | 29.0<br>(27.4-30.5) | 15.3<br>(12.6-18.2) | 51.5<br>(49.8-53.3) | 12.0<br>(10.4-13.7) | 42.7<br>(40.7-44.8) | 16.9<br>(15.0-18.9) | 63.1<br>(61.0-65.1) | 12.7<br>(10.5-15.2) | 45.8<br>(43.0-48.7) | 17.6<br>(14.6-21.0) | 64.6<br>(62.0-67.0) |
| <b>Somalia</b>                    | 7.5<br>(6.2-9.0)    | 24.4<br>(22.3-26.5) | 9.6<br>(7.8-11.6)   | 27.3<br>(25.1-29.8) | 7.4<br>(6.1-9.0)    | 24.1<br>(22.1-26.3) | 9.5<br>(7.8-11.6)   | 27.2<br>(24.8-29.5) | 7.3<br>(6.1-8.8)    | 24.4<br>(22.2-26.5) | 9.6<br>(8.0-11.7)   | 27.8<br>(25.4-30.2) | 7.6<br>(6.2-9.1)    | 24.9<br>(22.8-27.1) | 10.0<br>(8.0-12.2)  | 28.7<br>(26.3-31.2) |

| Country/Region                      | Males, 1980         |                     | Females, 1980       |                     | Males, 1990         |                     | Females, 1990       |                     | Males, 2000         |                     | Females, 2000       |                     | Males, 2013         |                     | Females, 2013       |                     |
|-------------------------------------|---------------------|---------------------|---------------------|---------------------|---------------------|---------------------|---------------------|---------------------|---------------------|---------------------|---------------------|---------------------|---------------------|---------------------|---------------------|---------------------|
|                                     | <20                 | >20                 | <20                 | >20                 | <20                 | >20                 | <20                 | >20                 | <20                 | >20                 | <20                 | >20                 | <20                 | >20                 | <20                 | >20                 |
| <b>South Sudan</b>                  | 13.5<br>(11.2-15.9) | 37.8<br>(35.0-40.6) | 19.5<br>(16.4-23.0) | 45.2<br>(42.3-48.2) | 13.5<br>(11.3-15.9) | 37.8<br>(35.1-40.6) | 19.6<br>(16.5-23.0) | 45.2<br>(42.2-48.1) | 13.8<br>(11.6-16.0) | 38.5<br>(35.8-41.3) | 20.3<br>(17.2-23.9) | 46.4<br>(43.5-49.5) | 14.7<br>(12.3-17.4) | 40.4<br>(37.7-43.4) | 21.6<br>(18.0-25.6) | 48.5<br>(45.4-51.4) |
| <b>Tanzania</b>                     | 11.7<br>(9.7-14.0)  | 22.1<br>(20.0-24.1) | 12.1<br>(9.9-14.5)  | 18.8<br>(17.0-20.6) | 12.0<br>(10.0-14.1) | 22.7<br>(20.7-24.8) | 12.7<br>(10.7-15.0) | 19.8<br>(18.3-21.3) | 9.7<br>(8.2-11.4)   | 19.2<br>(17.5-21.0) | 11.2<br>(9.2-13.3)  | 28.5<br>(26.6-30.5) | 8.9<br>(7.4-10.5)   | 20.4<br>(18.7-22.1) | 12.0<br>(10.0-14.2) | 38.5<br>(36.5-40.5) |
| <b>Uganda</b>                       | 7.2<br>(5.7-8.9)    | 6.3<br>(5.6-7.1)    | 12.2<br>(10.0-14.6) | 13.6<br>(12.2-15.1) | 7.2<br>(6.1-8.7)    | 6.5<br>(5.7-7.3)    | 12.7<br>(10.6-15.1) | 13.8<br>(12.5-15.2) | 6.3<br>(5.3-7.5)    | 6.6<br>(5.9-7.4)    | 13.9<br>(11.9-16.0) | 18.3<br>(16.9-19.7) | 5.7<br>(4.6-6.9)    | 6.9<br>(6.3-7.6)    | 14.6<br>(12.1-17.1) | 24.6<br>(22.7-26.6) |
| <b>Zambia</b>                       | 20.1<br>(17.0-23.3) | 23.6<br>(21.4-25.8) | 17.4<br>(14.4-20.8) | 31.1<br>(29.0-33.3) | 17.5<br>(15.0-20.4) | 21.6<br>(19.5-23.7) | 16.0<br>(13.4-19.0) | 29.9<br>(28.1-31.7) | 20.3<br>(17.6-23.1) | 19.9<br>(18.1-22.0) | 18.7<br>(15.9-21.6) | 32.9<br>(31.0-34.7) | 20.9<br>(18.1-24.1) | 20.1<br>(18.4-22.2) | 20.5<br>(17.4-23.8) | 39.5<br>(37.1-41.7) |
| <b>High-income Asia Pacific</b>     | 12.1<br>(11.0-13.2) | 19.3<br>(18.5-20.1) | 9.8<br>(9.0-10.7)   | 20.8<br>(20.0-21.5) | 13.7<br>(12.6-14.9) | 22.0<br>(21.4-22.7) | 10.7<br>(9.8-11.6)  | 20.7<br>(20.1-21.3) | 16.6<br>(15.5-17.6) | 27.2<br>(26.3-28.2) | 13.9<br>(13.0-14.8) | 20.5<br>(19.8-21.2) | 17.2<br>(15.6-19.0) | 31.7<br>(30.4-33.0) | 12.6<br>(11.2-14.3) | 20.6<br>(19.7-21.6) |
| <b>Brunei</b>                       | 4.3<br>(3.5-5.2)    | 15.9<br>(14.4-17.5) | 3.8<br>(3.0-4.7)    | 12.9<br>(11.6-14.4) | 5.5<br>(4.5-6.6)    | 19.3<br>(17.4-21.2) | 4.6<br>(3.7-5.7)    | 15.3<br>(13.9-17.0) | 6.1<br>(4.9-7.3)    | 21.3<br>(19.3-23.4) | 5.1<br>(4.1-6.2)    | 16.5<br>(14.8-18.2) | 6.7<br>(5.5-8.0)    | 23.3<br>(21.2-25.2) | 5.6<br>(4.5-6.8)    | 17.9<br>(16.2-19.8) |
| <b>Japan</b>                        | 9.6<br>(8.8-10.5)   | 18.0<br>(17.2-18.8) | 8.9<br>(8.1-9.7)    | 19.4<br>(18.6-20.2) | 12.0<br>(11.0-12.9) | 21.5<br>(20.8-22.3) | 10.2<br>(9.3-11.0)  | 18.5<br>(18.0-19.1) | 15.6<br>(14.6-16.7) | 26.1<br>(24.9-27.2) | 14.7<br>(13.7-15.9) | 18.0<br>(17.2-18.7) | 15.3<br>(13.2-17.6) | 28.9<br>(27.1-30.7) | 12.4<br>(10.2-14.6) | 17.6<br>(16.5-18.9) |
| <b>Singapore</b>                    | 13.6<br>(11.2-16.0) | 31.2<br>(28.5-33.9) | 10.0<br>(8.1-12.2)  | 26.4<br>(24.1-28.8) | 14.8<br>(12.3-17.6) | 33.3<br>(30.7-36.0) | 10.9<br>(9.0-13.2)  | 28.0<br>(25.5-30.5) | 17.3<br>(14.6-20.1) | 37.8<br>(35.2-40.5) | 11.9<br>(9.7-14.2)  | 29.6<br>(27.2-32.0) | 20.9<br>(17.5-24.3) | 44.3<br>(41.4-47.1) | 13.3<br>(10.9-16.0) | 32.5<br>(30.0-35.1) |
| <b>South Korea</b>                  | 17.2<br>(14.2-20.2) | 23.7<br>(21.6-25.9) | 11.8<br>(9.7-14.2)  | 26.3<br>(24.0-28.6) | 17.2<br>(14.4-20.3) | 23.1<br>(21.5-24.6) | 11.9<br>(9.8-14.5)  | 26.8<br>(25.2-28.3) | 18.5<br>(16.3-21.1) | 30.4<br>(29.0-31.7) | 12.5<br>(10.7-14.5) | 26.6<br>(25.4-27.8) | 21.2<br>(17.9-24.5) | 36.9<br>(35.1-38.8) | 13.2<br>(10.9-15.7) | 27.2<br>(25.6-28.9) |
| <b>High-income North America</b>    | 18.8<br>(16.2-21.4) | 56.8<br>(54.5-59.2) | 19.2<br>(16.6-22.2) | 43.7<br>(41.3-46.3) | 21.1<br>(19.9-22.4) | 60.6<br>(59.2-61.9) | 21.9<br>(20.7-23.3) | 48.5<br>(47.1-50.0) | 27.8<br>(26.6-29.1) | 67.3<br>(66.2-68.4) | 27.8<br>(26.5-29.2) | 57.3<br>(56.0-58.5) | 28.5<br>(26.2-30.9) | 70.3<br>(68.7-71.7) | 29.1<br>(26.7-31.5) | 60.5<br>(58.6-62.2) |
| <b>Canada</b>                       | 18.2<br>(15.1-21.4) | 57.4<br>(54.7-59.9) | 15.8<br>(13.1-18.9) | 41.9<br>(39.1-44.5) | 19.7<br>(16.6-23.0) | 58.9<br>(57.0-60.9) | 17.6<br>(14.8-20.6) | 42.8<br>(40.9-44.8) | 26.1<br>(23.4-29.2) | 64.1<br>(61.8-66.3) | 22.4<br>(19.8-25.3) | 47.3<br>(45.0-49.6) | 25.5<br>(22.4-28.7) | 64.5<br>(62.0-67.0) | 22.0<br>(19.1-25.5) | 48.5<br>(45.9-51.1) |
| <b>United States</b>                | 18.9<br>(16.1-21.8) | 56.7<br>(54.2-59.4) | 19.6<br>(16.6-23.0) | 43.9<br>(41.2-46.7) | 21.2<br>(19.9-22.6) | 60.7<br>(59.3-62.2) | 22.4<br>(21.0-23.9) | 49.1<br>(47.6-50.7) | 28.0<br>(26.7-29.3) | 67.7<br>(66.5-68.9) | 28.4<br>(26.9-29.8) | 58.4<br>(57.0-59.7) | 28.8<br>(26.4-31.4) | 70.9<br>(69.2-72.5) | 29.7<br>(27.2-32.5) | 61.9<br>(59.8-63.8) |
| <b>North Africa and Middle East</b> | 16.4<br>(15.4-17.5) | 50.0<br>(49.0-51.0) | 21.5<br>(20.3-22.8) | 55.2<br>(54.2-56.2) | 19.3<br>(18.2-20.5) | 54.2<br>(53.3-55.0) | 24.8<br>(23.5-26.1) | 58.8<br>(57.9-59.7) | 20.2<br>(19.1-21.2) | 55.4<br>(54.6-56.1) | 26.1<br>(24.9-27.4) | 62.4<br>(61.8-63.0) | 22.2<br>(21.0-23.3) | 58.5<br>(57.8-59.2) | 27.9<br>(26.6-29.2) | 65.5<br>(64.7-66.2) |
| <b>Algeria</b>                      | 13.3<br>(11.1-15.7) | 28.2<br>(25.8-30.6) | 20.4<br>(16.9-24.2) | 44.6<br>(41.5-47.6) | 16.2<br>(13.7-19.3) | 32.9<br>(30.3-35.5) | 23.9<br>(20.3-28.0) | 49.6<br>(46.5-52.6) | 18.1<br>(15.0-21.3) | 35.3<br>(33.3-37.5) | 26.0<br>(22.1-30.6) | 52.1<br>(49.8-54.4) | 21.7<br>(18.5-25.2) | 42.0<br>(39.0-44.8) | 30.0<br>(25.5-34.5) | 57.8<br>(55.1-60.9) |



| Country/Region      | Males, 1980         |                     | Females, 1980       |                     | Males, 1990         |                     | Females, 1990       |                     | Males, 2000         |                     | Females, 2000       |                     | Males, 2013         |                     | Females, 2013       |                     |
|---------------------|---------------------|---------------------|---------------------|---------------------|---------------------|---------------------|---------------------|---------------------|---------------------|---------------------|---------------------|---------------------|---------------------|---------------------|---------------------|---------------------|
|                     | <20                 | >20                 | <20                 | >20                 | <20                 | >20                 | <20                 | >20                 | <20                 | >20                 | <20                 | >20                 | <20                 | >20                 | <20                 | >20                 |
| <b>Bahrain</b>      | 13.8<br>(11.3-16.3) | 35.2<br>(32.6-37.8) | 19.3<br>(16.0-22.9) | 61.9<br>(59.3-64.5) | 17.4<br>(14.4-20.6) | 43.4<br>(40.7-46.2) | 23.4<br>(19.9-27.2) | 66.8<br>(64.1-69.5) | 20.2<br>(17.4-23.3) | 60.8<br>(58.6-63.0) | 25.8<br>(22.5-29.5) | 71.0<br>(69.0-72.8) | 22.4<br>(19.2-26.0) | 67.7<br>(65.3-70.2) | 26.7<br>(22.5-30.8) | 75.2<br>(72.8-77.5) |
| <b>Egypt</b>        | 23.8<br>(20.4-27.7) | 63.1<br>(60.5-65.9) | 27.8<br>(23.6-32.1) | 63.8<br>(60.9-66.7) | 30.0<br>(26.2-34.5) | 69.2<br>(66.6-71.7) | 33.6<br>(29.5-38.0) | 67.5<br>(65.2-69.7) | 30.6<br>(26.7-34.8) | 70.8<br>(68.5-73.2) | 37.9<br>(33.8-42.6) | 77.0<br>(75.5-78.4) | 31.5<br>(27.5-35.7) | 71.2<br>(68.9-73.7) | 39.5<br>(34.7-44.3) | 79.4<br>(77.6-81.3) |
| <b>Iran</b>         | 17.7<br>(14.7-20.9) | 39.9<br>(37.3-42.9) | 24.3<br>(20.5-28.3) | 53.4<br>(50.5-56.3) | 21.3<br>(17.9-24.9) | 45.0<br>(42.0-47.8) | 28.0<br>(23.8-32.5) | 57.7<br>(54.8-60.6) | 21.4<br>(18.5-24.7) | 45.4<br>(43.3-47.5) | 27.1<br>(23.2-31.0) | 58.3<br>(56.2-60.6) | 21.6<br>(18.6-25.4) | 49.4<br>(47.2-51.6) | 26.2<br>(22.3-30.4) | 63.3<br>(61.0-65.4) |
| <b>Iraq</b>         | 10.1<br>(8.3-12.0)  | 50.8<br>(47.7-53.9) | 14.1<br>(11.5-16.8) | 57.4<br>(54.3-60.2) | 11.1<br>(9.1-13.2)  | 53.7<br>(51.0-56.7) | 15.2<br>(12.5-18.1) | 59.7<br>(56.8-62.5) | 15.2<br>(12.9-17.8) | 59.3<br>(56.6-62.1) | 20.7<br>(17.5-24.0) | 65.4<br>(62.4-68.2) | 19.5<br>(16.5-22.8) | 62.4<br>(59.7-65.3) | 25.0<br>(21.3-28.9) | 68.1<br>(65.1-70.9) |
| <b>Jordan</b>       | 16.9<br>(14.4-19.8) | 64.6<br>(61.8-67.1) | 19.7<br>(16.4-23.4) | 67.1<br>(64.4-69.5) | 19.5<br>(16.3-23.0) | 68.3<br>(65.4-70.9) | 22.4<br>(19.1-26.5) | 70.3<br>(68.0-72.8) | 21.0<br>(17.8-24.3) | 69.6<br>(67.3-72.0) | 22.7<br>(19.4-26.2) | 72.7<br>(71.0-74.3) | 24.1<br>(20.6-28.0) | 71.6<br>(69.3-74.1) | 25.4<br>(21.8-29.3) | 75.6<br>(74.0-77.3) |
| <b>Kuwait</b>       | 15.9<br>(13.2-18.8) | 64.6<br>(62.1-67.1) | 32.8<br>(28.2-37.8) | 77.3<br>(75.0-79.5) | 14.1<br>(11.7-16.9) | 61.9<br>(59.2-64.4) | 30.2<br>(26.0-35.2) | 75.5<br>(73.2-77.9) | 20.2<br>(17.0-23.6) | 70.5<br>(68.3-72.8) | 39.4<br>(34.5-44.6) | 81.3<br>(79.3-83.2) | 24.6<br>(21.1-28.5) | 74.5<br>(72.4-76.6) | 45.5<br>(40.1-50.9) | 84.3<br>(82.6-86.1) |
| <b>Lebanon</b>      | 22.7<br>(19.2-26.5) | 58.7<br>(55.8-61.6) | 21.2<br>(17.8-25.2) | 52.6<br>(49.8-55.6) | 28.6<br>(24.6-32.9) | 65.6<br>(62.9-68.4) | 26.4<br>(22.3-30.9) | 59.0<br>(56.1-61.8) | 30.9<br>(27.1-35.1) | 68.4<br>(65.9-70.8) | 28.0<br>(24.3-32.3) | 60.8<br>(58.2-63.4) | 33.1<br>(28.9-37.9) | 71.1<br>(68.9-73.4) | 29.8<br>(25.6-34.0) | 62.3<br>(59.9-64.8) |
| <b>Libya</b>        | 30.8<br>(26.6-35.5) | 68.6<br>(65.9-71.2) | 40.0<br>(35.0-45.1) | 75.6<br>(73.2-78.0) | 31.5<br>(27.2-36.1) | 69.4<br>(66.8-71.9) | 40.8<br>(36.1-45.7) | 76.1<br>(73.5-78.4) | 31.5<br>(27.2-35.9) | 69.6<br>(67.3-72.2) | 40.8<br>(35.7-45.9) | 76.3<br>(73.8-78.8) | 32.5<br>(28.5-36.9) | 70.6<br>(68.1-73.1) | 41.7<br>(36.3-46.8) | 77.0<br>(74.6-79.3) |
| <b>Morocco</b>      | 14.7<br>(12.2-17.2) | 43.9<br>(41.1-46.9) | 19.8<br>(16.7-23.4) | 41.0<br>(38.1-43.7) | 17.6<br>(15.0-20.5) | 48.0<br>(45.5-50.9) | 22.8<br>(19.5-26.4) | 43.4<br>(41.3-45.6) | 20.0<br>(17.2-23.1) | 50.4<br>(48.3-52.5) | 21.3<br>(18.3-24.4) | 47.7<br>(45.9-49.5) | 22.5<br>(19.3-26.1) | 54.7<br>(51.7-57.5) | 25.9<br>(22.1-30.2) | 52.8<br>(50.0-55.5) |
| <b>Oman</b>         | 12.8<br>(10.7-15.2) | 35.4<br>(32.9-37.9) | 26.6<br>(22.8-31.0) | 51.8<br>(48.9-55.0) | 14.7<br>(12.2-17.5) | 38.6<br>(36.1-40.9) | 29.6<br>(25.1-34.2) | 55.1<br>(53.0-57.2) | 18.0<br>(15.2-21.1) | 42.0<br>(39.5-44.4) | 35.9<br>(31.1-41.3) | 65.7<br>(63.0-68.5) | 24.5<br>(20.5-28.5) | 53.7<br>(50.9-56.7) | 42.3<br>(37.4-47.5) | 73.4<br>(71.0-75.7) |
| <b>Palestine</b>    | 16.9<br>(14.2-19.9) | 56.1<br>(53.2-58.8) | 19.6<br>(16.3-23.1) | 66.9<br>(64.2-69.5) | 20.1<br>(17.1-23.4) | 60.6<br>(57.9-63.2) | 22.9<br>(19.4-27.0) | 70.3<br>(67.7-72.8) | 23.4<br>(19.6-27.5) | 64.8<br>(62.3-67.5) | 26.0<br>(21.9-30.2) | 73.4<br>(71.0-75.9) | 27.9<br>(23.8-31.9) | 70.0<br>(67.4-72.4) | 30.6<br>(26.4-35.5) | 77.0<br>(74.8-79.2) |
| <b>Qatar</b>        | 30.8<br>(26.9-35.4) | 70.9<br>(68.6-73.4) | 12.4<br>(10.1-15.1) | 74.2<br>(71.9-76.6) | 35.5<br>(30.9-40.2) | 74.9<br>(72.7-77.2) | 14.7<br>(12.3-17.7) | 76.9<br>(74.7-79.1) | 32.6<br>(28.2-37.0) | 75.3<br>(73.0-77.4) | 17.3<br>(14.5-20.6) | 77.9<br>(75.7-80.3) | 33.5<br>(29.3-38.0) | 75.7<br>(73.8-77.4) | 22.1<br>(18.6-25.7) | 78.5<br>(77.0-80.1) |
| <b>Saudi Arabia</b> | 14.0<br>(11.7-16.5) | 49.0<br>(46.5-51.8) | 22.6<br>(19.1-26.6) | 57.3<br>(54.6-60.1) | 16.3<br>(13.9-19.0) | 54.7<br>(52.7-56.7) | 24.9<br>(21.3-29.0) | 61.6<br>(59.7-63.6) | 19.7<br>(16.7-22.6) | 66.4<br>(64.0-68.7) | 33.6<br>(28.8-38.1) | 71.4<br>(69.2-73.6) | 23.5<br>(20.2-26.8) | 69.0<br>(67.1-70.7) | 37.4<br>(32.8-42.5) | 74.2<br>(72.3-76.0) |
| <b>Sudan</b>        | 7.7<br>(6.3-9.3)    | 27.0<br>(24.8-29.1) | 10.5<br>(8.8-12.6)  | 31.5<br>(29.0-34.1) | 8.9<br>(7.4-10.7)   | 30.1<br>(27.7-32.5) | 11.9<br>(9.7-14.3)  | 34.4<br>(31.6-37.0) | 9.9<br>(8.4-11.6)   | 32.9<br>(30.5-35.6) | 13.1<br>(10.8-15.4) | 37.1<br>(34.4-40.0) | 11.2<br>(9.2-13.4)  | 35.8<br>(33.2-38.4) | 14.4<br>(12.0-17.6) | 39.9<br>(37.3-42.7) |

| Country/Region                        | Males, 1980         |                     | Females, 1980       |                     | Males, 1990         |                     | Females, 1990       |                     | Males, 2000         |                     | Females, 2000       |                     | Males, 2013         |                     | Females, 2013       |                     |
|---------------------------------------|---------------------|---------------------|---------------------|---------------------|---------------------|---------------------|---------------------|---------------------|---------------------|---------------------|---------------------|---------------------|---------------------|---------------------|---------------------|---------------------|
|                                       | <20                 | >20                 | <20                 | >20                 | <20                 | >20                 | <20                 | >20                 | <20                 | >20                 | <20                 | >20                 | <20                 | >20                 | <20                 | >20                 |
| <b>Syria</b>                          | 26.0<br>(22.2-30.0) | 64.7<br>(61.9-67.3) | 31.8<br>(27.7-36.3) | 66.7<br>(63.9-69.5) | 27.4<br>(23.6-31.4) | 66.2<br>(63.6-68.8) | 32.9<br>(28.2-37.5) | 67.9<br>(65.3-70.6) | 29.3<br>(25.6-33.4) | 68.6<br>(66.2-71.1) | 32.3<br>(27.6-36.8) | 69.8<br>(67.4-72.3) | 32.9<br>(28.6-37.5) | 72.0<br>(69.5-74.2) | 33.3<br>(28.8-38.3) | 72.7<br>(69.9-75.1) |
| <b>Tunisia</b>                        | 10.8<br>(9.1-12.9)  | 40.6<br>(37.9-43.5) | 14.5<br>(12.1-17.4) | 47.9<br>(44.9-50.9) | 13.2<br>(11.1-15.8) | 45.5<br>(42.7-48.4) | 17.3<br>(14.5-20.3) | 52.2<br>(49.2-55.1) | 15.6<br>(13.2-18.3) | 48.6<br>(45.8-51.6) | 20.7<br>(17.6-24.1) | 54.9<br>(51.9-57.9) | 17.7<br>(15.0-20.8) | 51.7<br>(48.8-54.4) | 23.4<br>(19.6-27.5) | 57.5<br>(54.4-60.3) |
| <b>Turkey</b>                         | 14.1<br>(11.7-16.7) | 60.2<br>(57.5-62.8) | 16.5<br>(13.6-19.8) | 59.6<br>(56.8-62.3) | 16.8<br>(13.8-19.5) | 64.4<br>(61.8-66.8) | 19.4<br>(16.4-22.6) | 64.1<br>(61.8-66.6) | 16.9<br>(14.5-19.7) | 62.1<br>(59.8-64.4) | 18.3<br>(15.8-21.1) | 65.8<br>(64.0-67.6) | 20.4<br>(17.5-23.6) | 63.8<br>(62.1-65.5) | 19.8<br>(16.6-23.0) | 65.8<br>(64.2-67.5) |
| <b>United Arab Emirates</b>           | 25.2<br>(21.8-28.9) | 62.8<br>(60.2-65.5) | 26.0<br>(22.1-30.1) | 57.5<br>(54.7-60.5) | 26.0<br>(22.6-29.7) | 64.3<br>(61.7-66.9) | 26.6<br>(23.0-30.7) | 58.7<br>(55.6-61.7) | 27.0<br>(24.4-29.5) | 64.1<br>(61.6-66.6) | 27.2<br>(25.0-29.4) | 58.5<br>(55.7-61.3) | 30.8<br>(26.5-35.1) | 66.1<br>(63.6-68.8) | 31.6<br>(27.1-36.2) | 60.6<br>(57.4-63.4) |
| <b>Yemen</b>                          | 7.4<br>(6.1-8.9)    | 25.9<br>(23.8-28.2) | 24.5<br>(20.2-28.7) | 54.4<br>(51.2-57.2) | 7.7<br>(6.4-9.1)    | 26.8<br>(24.6-29.2) | 25.5<br>(21.9-29.4) | 55.3<br>(52.4-58.4) | 7.8<br>(6.3-9.3)    | 27.2<br>(24.9-29.6) | 25.5<br>(21.7-29.6) | 55.8<br>(52.8-58.9) | 8.4<br>(6.9-10.0)   | 29.0<br>(26.8-31.2) | 26.9<br>(22.9-31.4) | 57.9<br>(55.1-60.8) |
| <b>Oceania</b>                        | 15.7<br>(14.0-17.6) | 39.6<br>(37.8-41.5) | 20.8<br>(18.8-23.0) | 46.7<br>(44.6-48.6) | 16.1<br>(14.3-18.1) | 40.4<br>(38.4-42.5) | 21.2<br>(19.0-23.7) | 47.9<br>(45.8-49.9) | 16.6<br>(14.7-18.7) | 41.7<br>(39.8-43.7) | 22.0<br>(19.8-24.5) | 49.9<br>(47.8-52.0) | 17.8<br>(15.6-20.0) | 43.7<br>(41.7-45.7) | 22.9<br>(20.5-25.6) | 51.5<br>(49.2-53.8) |
| <b>Federated States of Micronesia</b> | 26.3<br>(22.5-30.4) | 59.4<br>(56.5-62.2) | 53.8<br>(48.6-59.1) | 77.9<br>(75.7-79.9) | 27.1<br>(23.1-31.1) | 60.4<br>(57.6-63.3) | 54.8<br>(49.4-59.9) | 78.9<br>(76.7-81.0) | 26.8<br>(22.9-31.0) | 61.3<br>(58.9-63.7) | 56.3<br>(51.0-61.1) | 80.7<br>(78.8-82.4) | 29.7<br>(25.7-33.9) | 65.7<br>(63.1-68.3) | 61.4<br>(56.2-66.4) | 84.2<br>(82.3-85.8) |
| <b>Fiji</b>                           | 8.6<br>(7.2-10.4)   | 32.0<br>(29.6-34.8) | 18.3<br>(15.2-21.8) | 49.8<br>(46.8-52.6) | 9.8<br>(8.2-11.8)   | 35.0<br>(32.3-37.7) | 20.4<br>(16.9-24.6) | 53.4<br>(50.5-56.4) | 11.3<br>(9.4-13.3)  | 38.7<br>(36.0-41.3) | 22.7<br>(19.0-26.3) | 57.5<br>(54.7-60.4) | 12.8<br>(10.6-15.3) | 41.9<br>(39.0-44.8) | 24.9<br>(20.6-29.3) | 60.4<br>(57.4-63.4) |
| <b>Kiribati</b>                       | 44.8<br>(39.9-50.1) | 73.5<br>(71.2-75.6) | 63.5<br>(58.8-68.3) | 78.8<br>(76.6-80.9) | 42.8<br>(38.0-47.9) | 72.0<br>(69.6-74.4) | 62.0<br>(56.9-67.0) | 78.1<br>(75.9-80.2) | 44.2<br>(39.1-49.2) | 73.9<br>(71.5-76.0) | 63.3<br>(58.2-68.1) | 79.8<br>(78.0-81.7) | 47.7<br>(42.3-52.9) | 76.5<br>(74.1-78.6) | 66.1<br>(60.9-70.9) | 81.8<br>(79.9-83.6) |
| <b>Marshall Islands</b>               | 18.2<br>(14.9-21.5) | 59.3<br>(56.6-62.1) | 22.5<br>(19.0-26.7) | 67.8<br>(65.2-70.3) | 20.3<br>(17.1-24.1) | 62.4<br>(59.8-65.0) | 24.8<br>(21.0-28.7) | 70.7<br>(68.3-73.1) | 27.5<br>(23.6-31.6) | 71.0<br>(69.1-72.9) | 33.9<br>(29.1-38.8) | 79.4<br>(77.7-81.0) | 29.2<br>(25.0-33.3) | 72.7<br>(70.5-75.1) | 36.1<br>(31.1-40.9) | 80.8<br>(78.8-82.6) |
| <b>Papua New Guinea</b>               | 14.3<br>(11.9-17.0) | 35.6<br>(33.0-38.3) | 16.3<br>(13.6-19.3) | 40.6<br>(37.8-43.4) | 14.6<br>(12.2-17.3) | 36.1<br>(33.3-39.1) | 16.7<br>(13.7-20.1) | 41.8<br>(38.8-44.4) | 14.9<br>(12.3-17.7) | 37.3<br>(34.6-39.9) | 17.1<br>(14.4-20.4) | 43.7<br>(40.9-46.6) | 16.0<br>(13.2-18.9) | 39.6<br>(37.0-42.2) | 18.3<br>(15.3-21.6) | 45.8<br>(42.6-48.8) |
| <b>Samoa</b>                          | 33.1<br>(28.6-37.6) | 77.4<br>(75.2-79.6) | 41.2<br>(36.2-46.4) | 79.8<br>(77.8-82.0) | 35.2<br>(30.7-39.8) | 78.7<br>(76.6-81.0) | 43.4<br>(38.0-48.7) | 81.3<br>(79.2-83.3) | 37.3<br>(32.8-42.0) | 80.3<br>(78.3-82.3) | 45.3<br>(40.2-50.5) | 83.0<br>(81.0-85.0) | 42.2<br>(37.4-47.2) | 83.0<br>(81.1-85.0) | 50.0<br>(45.1-55.0) | 85.0<br>(83.0-86.9) |
| <b>Solomon Islands</b>                | 24.5<br>(20.7-28.5) | 54.7<br>(51.8-57.6) | 44.3<br>(39.0-49.9) | 63.5<br>(60.7-66.3) | 24.8<br>(21.0-28.8) | 55.0<br>(52.2-57.8) | 44.7<br>(39.5-50.5) | 64.4<br>(61.3-67.1) | 26.4<br>(22.7-30.5) | 57.7<br>(55.2-60.2) | 46.8<br>(41.9-52.4) | 67.4<br>(64.9-69.7) | 28.3<br>(24.5-32.5) | 60.2<br>(57.5-62.8) | 49.2<br>(43.9-54.3) | 69.4<br>(66.9-71.9) |
| <b>Tonga</b>                          | 28.5<br>(24.5-32.8) | 77.3<br>(75.1-79.5) | 43.1<br>(37.8-48.3) | 83.6<br>(81.7-85.4) | 31.5<br>(27.4-35.7) | 79.5<br>(77.5-81.4) | 46.4<br>(41.3-51.6) | 85.4<br>(83.6-86.9) | 33.5<br>(29.4-37.7) | 81.8<br>(80.0-83.5) | 49.8<br>(45.0-54.4) | 87.2<br>(85.7-88.6) | 34.5<br>(30.2-39.3) | 83.5<br>(81.8-85.2) | 52.6<br>(47.1-58.2) | 88.3<br>(86.7-89.7) |

| Country/Region        | Males, 1980         |                     | Females, 1980       |                     | Males, 1990         |                     | Females, 1990       |                     | Males, 2000         |                     | Females, 2000       |                     | Males, 2013         |                     | Females, 2013       |                     |
|-----------------------|---------------------|---------------------|---------------------|---------------------|---------------------|---------------------|---------------------|---------------------|---------------------|---------------------|---------------------|---------------------|---------------------|---------------------|---------------------|---------------------|
|                       | <20                 | >20                 | <20                 | >20                 | <20                 | >20                 | <20                 | >20                 | <20                 | >20                 | <20                 | >20                 | <20                 | >20                 | <20                 | >20                 |
| <b>Vanuatu</b>        | 14.7<br>(12.3-17.5) | 47.0<br>(44.1-49.8) | 17.2<br>(14.2-20.3) | 40.5<br>(37.6-43.3) | 14.7<br>(12.3-17.1) | 47.0<br>(44.2-50.0) | 18.7<br>(15.4-22.3) | 43.7<br>(40.7-46.4) | 14.3<br>(12.0-17.0) | 47.1<br>(44.5-49.6) | 21.5<br>(18.2-25.1) | 53.0<br>(50.4-55.6) | 14.5<br>(12.1-17.2) | 46.4<br>(44.4-48.6) | 23.2<br>(19.4-27.1) | 54.8<br>(52.7-57.0) |
| <b>South Asia</b>     | 4.9<br>(4.2-5.7)    | 15.9<br>(14.7-17.0) | 4.9<br>(4.2-5.6)    | 15.8<br>(14.5-17.2) | 5.7<br>(4.9-6.5)    | 17.4<br>(16.1-18.9) | 5.6<br>(4.8-6.5)    | 17.4<br>(16.0-18.9) | 5.5<br>(4.8-6.4)    | 19.3<br>(18.0-20.5) | 5.5<br>(4.8-6.3)    | 20.8<br>(19.6-22.0) | 5.7<br>(5.0-6.5)    | 20.2<br>(18.8-21.5) | 6.2<br>(5.4-7.1)    | 22.5<br>(21.1-23.9) |
| <b>Afghanistan</b>    | 15.3<br>(12.8-18.0) | 43.5<br>(40.7-46.3) | 16.6<br>(13.7-19.8) | 38.2<br>(35.5-41.0) | 16.8<br>(14.0-19.7) | 46.1<br>(43.5-49.2) | 18.0<br>(15.1-21.4) | 40.4<br>(37.6-43.2) | 17.8<br>(14.9-20.7) | 48.0<br>(44.9-50.6) | 18.8<br>(15.6-22.3) | 41.8<br>(39.0-44.7) | 18.5<br>(15.6-21.6) | 49.2<br>(46.5-52.0) | 19.5<br>(16.4-22.8) | 42.6<br>(40.5-44.8) |
| <b>Bangladesh</b>     | 3.2<br>(2.6-3.9)    | 8.5<br>(7.5-9.5)    | 2.9<br>(2.3-3.5)    | 5.7<br>(5.1-6.5)    | 3.5<br>(2.9-4.3)    | 9.4<br>(8.3-10.5)   | 3.3<br>(2.6-4.1)    | 6.4<br>(5.7-7.2)    | 3.8<br>(3.1-4.7)    | 12.2<br>(11.0-13.7) | 3.3<br>(2.6-4.1)    | 10.3<br>(9.3-11.3)  | 4.7<br>(3.8-5.8)    | 15.2<br>(13.8-16.5) | 4.3<br>(3.6-5.3)    | 18.7<br>(17.3-20.3) |
| <b>Bhutan</b>         | 8.3<br>(6.8-10.1)   | 27.8<br>(25.7-30.3) | 11.6<br>(9.5-13.9)  | 32.6<br>(30.1-35.1) | 8.8<br>(7.3-10.7)   | 29.3<br>(26.9-31.6) | 12.3<br>(9.9-14.9)  | 34.0<br>(31.4-36.7) | 9.6<br>(7.8-11.5)   | 31.3<br>(28.7-33.9) | 13.2<br>(10.8-15.7) | 36.3<br>(33.6-39.2) | 10.5<br>(8.8-12.3)  | 33.0<br>(30.5-35.6) | 14.4<br>(11.9-17.0) | 38.2<br>(35.3-41.2) |
| <b>India</b>          | 4.5<br>(3.7-5.5)    | 15.4<br>(13.9-16.9) | 4.2<br>(3.3-5.1)    | 15.4<br>(13.8-17.1) | 5.4<br>(4.5-6.5)    | 17.3<br>(15.7-19.2) | 4.9<br>(4.0-6.0)    | 17.2<br>(15.4-18.9) | 5.3<br>(4.4-6.4)    | 19.1<br>(17.5-20.5) | 4.9<br>(4.0-5.9)    | 20.5<br>(19.0-21.9) | 5.3<br>(4.3-6.4)    | 19.5<br>(17.8-21.2) | 5.2<br>(4.2-6.4)    | 20.7<br>(18.9-22.5) |
| <b>Nepal</b>          | 3.9<br>(3.2-4.7)    | 10.2<br>(9.2-11.4)  | 3.0<br>(2.3-3.7)    | 4.8<br>(4.2-5.4)    | 4.8<br>(4.0-5.8)    | 12.5<br>(11.2-13.9) | 3.6<br>(2.9-4.5)    | 5.8<br>(5.2-6.5)    | 4.6<br>(3.8-5.5)    | 12.7<br>(11.5-14.1) | 3.3<br>(2.7-4.0)    | 8.2<br>(7.4-9.0)    | 4.6<br>(3.8-5.6)    | 13.1<br>(11.8-14.6) | 4.0<br>(4.8)        | 13.0<br>(11.8-14.2) |
| <b>Pakistan</b>       | 8.1<br>(6.7-9.8)    | 24.0<br>(22.0-26.1) | 11.1<br>(8.8-13.3)  | 29.1<br>(26.6-31.6) | 8.2<br>(7.0-9.6)    | 24.5<br>(22.5-26.6) | 11.3<br>(9.4-13.4)  | 29.9<br>(27.4-32.7) | 6.2<br>(5.0-7.6)    | 25.5<br>(23.2-27.8) | 9.7<br>(8.0-11.6)   | 33.0<br>(30.1-35.8) | 6.2<br>(5.2-7.3)    | 27.9<br>(25.8-30.1) | 10.4<br>(8.7-12.3)  | 38.4<br>(36.4-40.6) |
| <b>Southeast Asia</b> | 3.9<br>(3.6-4.2)    | 12.3<br>(11.7-12.9) | 5.1<br>(4.6-5.6)    | 17.6<br>(16.8-18.5) | 4.1<br>(3.8-4.4)    | 12.9<br>(12.3-13.5) | 5.5<br>(5.0-6.1)    | 18.4<br>(17.6-19.1) | 5.0<br>(4.6-5.4)    | 16.2<br>(15.7-16.8) | 6.9<br>(6.3-7.6)    | 23.3<br>(22.6-24.0) | 6.8<br>(6.3-7.5)    | 22.1<br>(21.2-23.0) | 9.0<br>(8.1-9.9)    | 28.3<br>(27.2-29.3) |
| <b>Cambodia</b>       | 3.3<br>(2.7-4.0)    | 8.0<br>(7.2-8.9)    | 3.1<br>(2.5-3.9)    | 10.8<br>(9.7-12.1)  | 3.5<br>(2.9-4.2)    | 8.5<br>(7.5-9.5)    | 3.3<br>(2.6-4.1)    | 11.3<br>(10.1-12.5) | 3.7<br>(3.1-4.4)    | 9.8<br>(8.9-10.8)   | 3.6<br>(2.9-4.3)    | 13.4<br>(12.2-14.7) | 3.8<br>(3.1-4.5)    | 11.9<br>(11.1-12.7) | 3.8<br>(3.1-4.7)    | 18.3<br>(17.0-19.7) |
| <b>Indonesia</b>      | 2.8<br>(2.3-3.5)    | 10.1<br>(9.0-11.4)  | 5.4<br>(4.3-6.5)    | 17.8<br>(16.1-19.8) | 3.3<br>(2.7-4.0)    | 10.8<br>(9.7-11.8)  | 6.2<br>(5.1-7.6)    | 18.6<br>(17.0-20.4) | 3.9<br>(3.2-4.7)    | 14.3<br>(13.3-15.4) | 7.6<br>(6.2-9.2)    | 23.7<br>(22.4-25.1) | 6.0<br>(5.0-7.3)    | 21.4<br>(19.5-23.3) | 10.0<br>(8.3-12.1)  | 30.6<br>(28.4-33.1) |
| <b>Laos</b>           | 3.8<br>(3.1-4.5)    | 17.0<br>(15.4-18.7) | 5.4<br>(4.4-6.6)    | 20.8<br>(18.8-22.9) | 3.9<br>(3.2-4.7)    | 17.4<br>(15.8-19.2) | 5.5<br>(4.5-6.7)    | 21.1<br>(19.1-23.1) | 3.7<br>(3.1-4.5)    | 19.1<br>(17.4-20.8) | 5.6<br>(4.5-6.7)    | 23.3<br>(21.4-25.3) | 4.1<br>(3.4-4.9)    | 22.1<br>(20.3-23.8) | 5.8<br>(4.7-7.1)    | 27.0<br>(25.0-29.1) |
| <b>Malaysia</b>       | 16.7<br>(13.8-19.7) | 34.9<br>(32.1-37.4) | 14.3<br>(11.8-17.1) | 39.6<br>(36.7-42.6) | 17.3<br>(14.5-20.3) | 35.9<br>(33.3-38.7) | 14.9<br>(12.4-17.9) | 40.7<br>(37.9-43.7) | 19.8<br>(17.1-23.0) | 39.9<br>(37.4-42.3) | 16.8<br>(13.9-19.6) | 44.7<br>(42.1-47.4) | 22.5<br>(19.1-26.1) | 43.8<br>(41.1-46.5) | 19.1<br>(16.1-22.6) | 48.6<br>(45.6-51.5) |
| <b>Maldives</b>       | 5.2<br>(4.3-6.3)    | 19.2<br>(17.4-21.1) | 13.0<br>(10.7-15.4) | 44.7<br>(42.0-47.8) | 6.0<br>(4.9-7.2)    | 21.7<br>(19.7-23.8) | 14.6<br>(11.9-17.4) | 47.9<br>(45.1-50.8) | 6.8<br>(5.7-8.3)    | 23.9<br>(21.8-26.0) | 16.0<br>(13.2-19.1) | 50.7<br>(47.8-53.5) | 7.9<br>(6.5-9.5)    | 26.8<br>(24.6-28.9) | 18.0<br>(15.0-21.3) | 54.0<br>(51.7-56.3) |

| Country/Region                     | Males, 1980         |                     | Females, 1980       |                     | Males, 1990         |                     | Females, 1990       |                     | Males, 2000         |                     | Females, 2000       |                     | Males, 2013         |                     | Females, 2013       |                     |
|------------------------------------|---------------------|---------------------|---------------------|---------------------|---------------------|---------------------|---------------------|---------------------|---------------------|---------------------|---------------------|---------------------|---------------------|---------------------|---------------------|---------------------|
|                                    | <20                 | >20                 | <20                 | >20                 | <20                 | >20                 | <20                 | >20                 | <20                 | >20                 | <20                 | >20                 | <20                 | >20                 | <20                 | >20                 |
| <b>Myanmar</b>                     | 3.9<br>(3.2-4.7)    | 11.4<br>(10.1-12.7) | 6.4<br>(5.2-7.7)    | 18.9<br>(17.0-20.9) | 3.7<br>(3.0-4.5)    | 10.8<br>(9.7-12.1)  | 6.1<br>(5.0-7.4)    | 18.2<br>(16.3-20.2) | 3.9<br>(3.3-4.7)    | 11.7<br>(10.5-12.9) | 6.5<br>(5.4-7.8)    | 19.5<br>(17.6-21.4) | 4.6<br>(3.7-5.5)    | 13.8<br>(12.7-15.1) | 7.4<br>(6.1-8.9)    | 22.1<br>(20.6-23.8) |
| <b>Philippines</b>                 | 2.3<br>(1.9-2.8)    | 16.5<br>(14.8-18.3) | 3.1<br>(2.5-3.9)    | 16.7<br>(15.0-18.5) | 2.6<br>(2.0-3.1)    | 17.9<br>(16.2-19.7) | 3.4<br>(2.7-4.2)    | 17.7<br>(16.2-19.3) | 3.7<br>(3.0-4.5)    | 20.6<br>(18.8-22.5) | 4.3<br>(3.5-5.2)    | 22.3<br>(20.6-24.2) | 5.5<br>(4.5-6.6)    | 22.9<br>(21.0-24.8) | 5.4<br>(4.4-6.6)    | 25.9<br>(23.8-28.2) |
| <b>Sri Lanka</b>                   | 4.6<br>(3.8-5.5)    | 13.8<br>(12.5-15.3) | 8.2<br>(6.7-9.9)    | 25.4<br>(23.1-27.9) | 4.5<br>(3.7-5.4)    | 13.7<br>(12.3-15.1) | 8.0<br>(6.5-9.7)    | 25.0<br>(22.6-27.3) | 4.7<br>(3.8-5.7)    | 16.4<br>(15.0-17.8) | 8.4<br>(6.9-10.0)   | 28.8<br>(27.0-30.5) | 5.0<br>(4.1-6.0)    | 19.3<br>(17.5-21.1) | 8.9<br>(7.4-10.8)   | 32.4<br>(29.9-35.1) |
| <b>Thailand</b>                    | 7.5<br>(6.2-9.1)    | 17.4<br>(15.8-19.2) | 5.4<br>(4.2-6.9)    | 22.3<br>(20.2-24.3) | 7.8<br>(6.3-9.4)    | 17.6<br>(15.8-19.5) | 5.9<br>(4.7-7.3)    | 23.7<br>(21.6-25.8) | 10.8<br>(9.0-12.7)  | 23.0<br>(21.5-24.5) | 11.9<br>(9.9-14.2)  | 34.3<br>(32.1-36.7) | 13.3<br>(11.4-15.9) | 32.1<br>(30.1-34.2) | 15.4<br>(12.7-18.2) | 39.7<br>(37.1-42.4) |
| <b>Timor-Leste</b>                 | 6.3<br>(5.2-7.6)    | 3.0<br>(2.7-3.4)    | 5.2<br>(4.1-6.5)    | 6.5<br>(5.7-7.4)    | 6.3<br>(5.2-7.7)    | 3.0<br>(2.6-3.4)    | 5.2<br>(4.1-6.4)    | 6.5<br>(5.6-7.3)    | 6.4<br>(5.2-7.7)    | 3.0<br>(2.7-3.4)    | 5.3<br>(4.2-6.6)    | 6.4<br>(5.6-7.2)    | 7.0<br>(5.8-8.3)    | 3.2<br>(2.9-3.6)    | 5.7<br>(4.6-7.0)    | 6.6<br>(5.9-7.2)    |
| <b>Vietnam</b>                     | 1.6<br>(1.3-2.0)    | 4.3<br>(3.8-4.8)    | 2.3<br>(1.8-2.9)    | 6.2<br>(5.5-6.9)    | 1.8<br>(1.4-2.1)    | 4.7<br>(4.2-5.2)    | 2.5<br>(1.9-3.1)    | 6.7<br>(5.9-7.5)    | 2.5<br>(2.1-3.1)    | 7.4<br>(6.6-8.2)    | 3.3<br>(2.7-4.0)    | 8.7<br>(7.9-9.7)    | 5.2<br>(4.3-6.3)    | 13.6<br>(12.5-15.0) | 6.1<br>(5.0-7.4)    | 12.3<br>(11.2-13.4) |
| <b>Southern Latin America</b>      | 27.6<br>(24.7-30.4) | 59.3<br>(57.1-61.4) | 25.2<br>(22.2-28.2) | 52.2<br>(50.0-54.4) | 26.8<br>(23.9-29.9) | 58.2<br>(56.1-60.3) | 24.3<br>(21.5-27.1) | 51.3<br>(49.2-53.3) | 29.7<br>(26.6-32.8) | 60.6<br>(58.6-62.6) | 26.3<br>(23.5-29.3) | 53.4<br>(51.4-55.6) | 31.3<br>(28.0-34.4) | 60.0<br>(58.0-61.9) | 26.4<br>(23.7-29.6) | 53.0<br>(50.9-55.2) |
| <b>Argentina</b>                   | 30.7<br>(26.5-35.2) | 58.7<br>(55.9-61.5) | 25.0<br>(20.9-29.2) | 50.2<br>(47.2-53.1) | 29.2<br>(25.2-33.5) | 57.0<br>(54.1-59.8) | 23.8<br>(20.2-27.7) | 48.7<br>(45.6-51.5) | 30.5<br>(26.2-35.0) | 58.5<br>(55.7-61.5) | 24.9<br>(21.0-29.1) | 49.9<br>(46.9-53.1) | 29.1<br>(24.9-33.1) | 56.4<br>(53.5-59.2) | 23.6<br>(19.8-27.8) | 48.1<br>(45.0-51.1) |
| <b>Chile</b>                       | 20.7<br>(17.5-24.3) | 62.0<br>(59.1-64.8) | 23.4<br>(19.5-27.4) | 58.1<br>(55.3-61.1) | 20.7<br>(17.3-24.3) | 61.9<br>(59.3-64.6) | 23.2<br>(19.7-27.5) | 58.2<br>(55.2-61.1) | 27.5<br>(23.4-31.9) | 65.6<br>(63.6-67.7) | 27.5<br>(23.4-31.8) | 61.9<br>(59.4-64.3) | 37.0<br>(32.6-41.6) | 67.9<br>(65.5-70.3) | 31.6<br>(27.3-36.3) | 63.9<br>(61.3-66.4) |
| <b>Uruguay</b>                     | 29.8<br>(25.3-34.6) | 58.3<br>(55.3-61.1) | 37.0<br>(32.2-42.2) | 52.1<br>(49.1-55.2) | 28.0<br>(24.0-32.4) | 56.3<br>(53.5-59.2) | 34.9<br>(30.2-40.0) | 50.1<br>(47.0-53.2) | 30.1<br>(25.7-34.4) | 58.6<br>(55.7-61.4) | 36.9<br>(32.2-41.6) | 52.2<br>(49.3-55.1) | 31.2<br>(26.7-35.8) | 59.6<br>(56.7-62.4) | 37.7<br>(32.8-43.1) | 53.1<br>(49.9-56.1) |
| <b>Southern Sub-Saharan Africa</b> | 12.7<br>(11.0-14.5) | 31.8<br>(29.9-33.9) | 18.6<br>(16.2-20.9) | 54.4<br>(52.1-56.8) | 13.0<br>(11.5-14.5) | 31.2<br>(29.3-33.1) | 19.3<br>(17.2-21.4) | 54.1<br>(52.0-56.1) | 12.7<br>(11.7-13.8) | 31.7<br>(30.5-33.0) | 19.8<br>(18.6-21.1) | 56.5<br>(55.4-57.6) | 14.9<br>(13.7-16.1) | 34.2<br>(33.0-35.3) | 23.1<br>(21.6-24.6) | 63.7<br>(62.7-64.7) |
| <b>Botswana</b>                    | 5.8<br>(4.7-7.1)    | 19.3<br>(17.4-21.2) | 20.0<br>(16.6-23.7) | 48.7<br>(45.7-51.6) | 6.4<br>(5.3-7.6)    | 20.9<br>(18.9-23.0) | 21.5<br>(18.0-25.6) | 50.7<br>(47.8-53.7) | 6.3<br>(5.2-7.7)    | 20.7<br>(18.8-22.7) | 21.6<br>(18.1-25.5) | 51.1<br>(48.2-54.0) | 6.6<br>(5.5-7.9)    | 21.5<br>(19.7-23.5) | 22.4<br>(18.8-26.4) | 52.6<br>(50.0-55.1) |
| <b>Lesotho</b>                     | 16.0<br>(13.3-18.7) | 17.6<br>(15.9-19.5) | 25.1<br>(21.4-29.2) | 55.7<br>(52.9-58.6) | 16.6<br>(13.7-19.6) | 18.2<br>(16.4-20.1) | 26.5<br>(22.4-31.3) | 56.7<br>(53.8-59.7) | 13.5<br>(11.5-15.7) | 19.9<br>(18.1-21.7) | 26.0<br>(22.8-29.6) | 58.6<br>(56.3-60.9) | 9.1<br>(7.5-11.0)   | 21.6<br>(19.9-23.3) | 21.9<br>(18.8-25.8) | 60.2<br>(57.9-62.5) |
| <b>Namibia</b>                     | 6.0<br>(4.9-7.2)    | 21.4<br>(19.6-23.4) | 8.6<br>(6.9-10.3)   | 30.6<br>(28.1-33.2) | 5.6<br>(4.7-6.7)    | 20.3<br>(18.5-22.4) | 8.1<br>(6.7-9.7)    | 29.5<br>(27.5-31.7) | 5.3<br>(4.5-6.2)    | 20.0<br>(18.2-22.1) | 8.1<br>(6.7-9.7)    | 37.8<br>(35.5-40.4) | 6.0<br>(4.9-7.2)    | 21.2<br>(19.2-23.1) | 8.8<br>(7.3-10.7)   | 42.4<br>(39.8-45.1) |

| Country/Region                | Males, 1980         |                     | Females, 1980       |                     | Males, 1990         |                     | Females, 1990       |                     | Males, 2000         |                     | Females, 2000       |                     | Males, 2013         |                     | Females, 2013       |                     |
|-------------------------------|---------------------|---------------------|---------------------|---------------------|---------------------|---------------------|---------------------|---------------------|---------------------|---------------------|---------------------|---------------------|---------------------|---------------------|---------------------|---------------------|
|                               | <20                 | >20                 | <20                 | >20                 | <20                 | >20                 | <20                 | >20                 | <20                 | >20                 | <20                 | >20                 | <20                 | >20                 | <20                 | >20                 |
| <b>South Africa</b>           | 13.7<br>(11.3-16.3) | 36.1<br>(33.6-38.7) | 19.5<br>(16.1-22.8) | 58.7<br>(55.7-61.8) | 14.5<br>(12.6-16.8) | 36.2<br>(33.6-38.8) | 20.8<br>(17.9-23.7) | 59.2<br>(56.2-61.9) | 14.7<br>(13.2-16.3) | 36.5<br>(34.9-38.2) | 20.8<br>(19.1-22.6) | 61.3<br>(59.8-62.8) | 18.8<br>(17.0-20.6) | 38.8<br>(37.4-40.3) | 26.3<br>(24.3-28.5) | 69.3<br>(68.1-70.4) |
| <b>Swaziland</b>              | 14.6<br>(12.0-17.5) | 34.6<br>(32.1-37.2) | 29.1<br>(24.6-33.7) | 68.3<br>(65.7-70.9) | 14.5<br>(12.0-17.0) | 34.2<br>(31.8-36.8) | 29.1<br>(24.6-33.7) | 68.2<br>(65.7-70.9) | 13.5<br>(11.6-15.5) | 33.8<br>(31.3-36.2) | 28.2<br>(24.3-32.2) | 68.9<br>(66.3-71.1) | 11.6<br>(9.9-13.9)  | 33.5<br>(31.1-35.9) | 26.2<br>(22.6-30.4) | 68.6<br>(66.2-71.0) |
| <b>Zimbabwe</b>               | 10.6<br>(8.8-12.8)  | 17.4<br>(15.6-19.0) | 15.1<br>(12.5-17.9) | 37.0<br>(34.1-39.9) | 9.6<br>(8.0-11.4)   | 15.9<br>(14.4-17.6) | 14.3<br>(11.9-17.1) | 34.5<br>(32.2-36.9) | 8.7<br>(7.4-10.3)   | 15.5<br>(14.1-17.1) | 16.9<br>(14.4-19.6) | 36.8<br>(35.0-38.6) | 7.5<br>(6.2-9.0)    | 16.5<br>(15.2-17.8) | 16.1<br>(13.6-18.9) | 41.9<br>(39.7-44.1) |
| <b>Tropical Latin America</b> | 12.1<br>(10.1-14.3) | 38.2<br>(35.6-41.0) | 14.1<br>(11.8-16.6) | 44.2<br>(41.2-47.1) | 12.5<br>(10.7-14.5) | 38.6<br>(36.4-40.9) | 14.6<br>(12.5-17.0) | 44.5<br>(42.2-46.9) | 16.2<br>(14.9-17.6) | 42.1<br>(40.7-43.6) | 17.3<br>(15.8-18.9) | 44.6<br>(43.2-46.1) | 22.0<br>(18.9-25.6) | 52.7<br>(50.0-55.3) | 24.3<br>(20.7-28.0) | 58.8<br>(56.0-61.6) |
| <b>Brazil</b>                 | 12.1<br>(10.0-14.4) | 37.7<br>(35.1-40.6) | 14.0<br>(11.6-16.7) | 43.6<br>(40.5-46.5) | 12.4<br>(10.7-14.5) | 38.1<br>(35.8-40.4) | 14.6<br>(12.4-17.0) | 43.9<br>(41.5-46.3) | 16.1<br>(14.8-17.5) | 41.6<br>(40.1-43.1) | 17.1<br>(15.6-18.7) | 43.9<br>(42.5-45.4) | 22.1<br>(18.8-25.8) | 52.5<br>(49.6-55.2) | 24.3<br>(20.6-28.1) | 58.4<br>(55.6-61.3) |
| <b>Paraguay</b>               | 13.7<br>(11.3-16.3) | 58.9<br>(56.1-61.7) | 16.3<br>(13.4-19.3) | 69.5<br>(66.9-72.1) | 14.2<br>(12.2-16.7) | 59.4<br>(56.6-62.4) | 16.9<br>(14.2-20.0) | 70.0<br>(67.5-72.7) | 19.1<br>(16.0-22.4) | 62.1<br>(59.1-64.8) | 21.6<br>(18.0-25.7) | 72.1<br>(69.5-74.6) | 21.3<br>(18.1-24.5) | 62.9<br>(60.0-65.7) | 24.3<br>(20.6-28.5) | 73.0<br>(70.6-75.3) |
| <b>Western Europe</b>         | 19.6<br>(18.5-20.8) | 52.9<br>(51.9-54.0) | 17.6<br>(16.5-18.8) | 39.2<br>(38.2-40.2) | 20.6<br>(19.6-21.7) | 55.6<br>(54.7-56.5) | 18.4<br>(17.4-19.4) | 41.5<br>(40.6-42.4) | 22.6<br>(21.7-23.4) | 60.4<br>(59.7-61.1) | 20.5<br>(19.8-21.4) | 46.2<br>(45.5-46.9) | 24.2<br>(23.1-25.2) | 61.3<br>(60.5-62.2) | 22.0<br>(21.0-23.0) | 47.6<br>(46.8-48.4) |
| <b>Andorra</b>                | 13.5<br>(11.3-15.9) | 40.2<br>(37.6-42.8) | 14.8<br>(12.1-17.7) | 36.3<br>(33.8-39.1) | 14.3<br>(11.9-16.8) | 41.2<br>(38.7-43.7) | 15.7<br>(13.0-18.8) | 37.3<br>(34.8-39.9) | 15.0<br>(12.5-17.6) | 35.5<br>(33.2-38.0) | 17.5<br>(14.5-20.6) | 34.7<br>(32.3-37.3) | 15.9<br>(13.3-19.0) | 34.4<br>(32.0-37.1) | 18.4<br>(14.9-21.8) | 36.1<br>(33.5-38.7) |
| <b>Austria</b>                | 16.7<br>(14.1-19.8) | 45.0<br>(42.5-47.9) | 14.3<br>(11.7-17.0) | 27.1<br>(25.0-29.3) | 18.6<br>(15.5-21.9) | 49.7<br>(46.8-52.3) | 16.1<br>(13.3-19.3) | 30.4<br>(28.1-32.8) | 19.6<br>(16.8-22.9) | 59.2<br>(56.5-62.0) | 17.2<br>(14.4-20.7) | 40.5<br>(37.7-43.2) | 18.9<br>(15.9-22.1) | 59.7<br>(57.0-62.3) | 16.3<br>(13.5-19.4) | 42.8<br>(40.1-45.4) |
| <b>Belgium</b>                | 19.1<br>(16.1-22.4) | 50.6<br>(47.8-53.4) | 16.7<br>(13.8-19.7) | 40.9<br>(38.3-43.5) | 20.0<br>(16.8-23.6) | 53.1<br>(50.2-55.8) | 17.8<br>(14.7-21.3) | 43.0<br>(40.3-46.0) | 19.7<br>(16.7-23.0) | 55.9<br>(53.6-58.3) | 18.5<br>(15.5-21.8) | 45.1<br>(42.5-47.9) | 20.5<br>(17.7-23.6) | 58.0<br>(55.2-60.8) | 18.8<br>(16.0-21.8) | 47.1<br>(44.3-49.9) |
| <b>Cyprus</b>                 | 21.7<br>(18.2-25.2) | 61.8<br>(58.9-64.4) | 18.6<br>(15.3-22.2) | 47.5<br>(44.5-50.4) | 24.0<br>(20.3-27.9) | 64.8<br>(61.9-67.7) | 20.6<br>(17.1-24.3) | 50.3<br>(47.2-53.2) | 24.6<br>(21.1-28.2) | 65.9<br>(63.2-68.6) | 21.7<br>(18.2-25.3) | 51.1<br>(47.8-54.0) | 25.7<br>(21.9-29.6) | 67.8<br>(65.0-70.6) | 22.5<br>(18.9-26.2) | 52.1<br>(49.1-55.1) |
| <b>Denmark</b>                | 17.5<br>(14.6-20.9) | 49.8<br>(47.0-52.6) | 13.7<br>(10.9-16.3) | 33.5<br>(31.1-36.0) | 18.9<br>(15.9-22.1) | 52.5<br>(49.6-55.3) | 14.9<br>(12.4-17.7) | 36.1<br>(33.6-38.6) | 20.2<br>(17.3-23.7) | 57.8<br>(54.9-60.6) | 17.7<br>(14.8-21.1) | 43.7<br>(40.7-46.5) | 19.7<br>(16.8-23.1) | 59.2<br>(56.5-61.9) | 19.4<br>(15.8-23.2) | 44.7<br>(41.7-47.7) |
| <b>Finland</b>                | 20.8<br>(17.6-24.3) | 54.9<br>(52.1-57.7) | 16.7<br>(13.7-20.0) | 43.2<br>(40.5-45.8) | 21.3<br>(17.9-24.8) | 56.6<br>(53.8-59.3) | 17.2<br>(14.3-20.5) | 44.0<br>(41.5-46.5) | 22.5<br>(19.5-26.0) | 59.5<br>(57.0-62.0) | 18.3<br>(15.4-21.5) | 45.8<br>(43.5-47.9) | 26.0<br>(22.3-29.8) | 62.2<br>(59.5-64.9) | 21.1<br>(17.7-25.0) | 50.4<br>(47.5-53.2) |
| <b>France</b>                 | 17.8<br>(15.1-21.0) | 47.0<br>(44.4-49.8) | 14.3<br>(11.8-17.4) | 32.4<br>(30.0-34.9) | 19.7<br>(16.7-23.2) | 50.1<br>(47.4-53.0) | 15.7<br>(13.0-18.8) | 35.4<br>(32.8-38.0) | 21.2<br>(18.6-23.9) | 54.6<br>(52.0-57.2) | 16.7<br>(14.2-19.4) | 41.3<br>(38.6-44.1) | 19.9<br>(16.8-23.3) | 55.9<br>(53.2-58.7) | 16.0<br>(13.3-18.7) | 42.8<br>(40.0-45.7) |

| Country/Region     | Males, 1980         |                     | Females, 1980       |                     | Males, 1990         |                     | Females, 1990       |                     | Males, 2000         |                     | Females, 2000       |                     | Males, 2013         |                     | Females, 2013       |                     |
|--------------------|---------------------|---------------------|---------------------|---------------------|---------------------|---------------------|---------------------|---------------------|---------------------|---------------------|---------------------|---------------------|---------------------|---------------------|---------------------|---------------------|
|                    | <20                 | >20                 | <20                 | >20                 | <20                 | >20                 | <20                 | >20                 | <20                 | >20                 | <20                 | >20                 | <20                 | >20                 | <20                 | >20                 |
| <b>Germany</b>     | 16.6<br>(14.0-19.7) | 57.5<br>(54.7-60.3) | 15.2<br>(12.6-18.3) | 39.6<br>(36.9-42.3) | 16.9<br>(14.6-19.6) | 60.3<br>(57.7-62.9) | 15.8<br>(13.4-18.1) | 42.7<br>(40.2-45.3) | 18.8<br>(16.6-21.1) | 63.8<br>(62.0-65.7) | 18.0<br>(15.9-20.3) | 48.0<br>(45.9-49.9) | 20.5<br>(17.4-23.8) | 64.3<br>(61.9-66.8) | 19.4<br>(16.3-22.5) | 49.0<br>(46.5-51.4) |
| <b>Greece</b>      | 20.4<br>(17.5-23.9) | 56.2<br>(53.5-59.0) | 19.0<br>(15.8-22.3) | 43.0<br>(40.2-45.7) | 23.4<br>(20.4-26.7) | 61.9<br>(59.2-64.6) | 20.9<br>(18.0-24.2) | 45.8<br>(43.3-48.4) | 28.6<br>(25.6-31.5) | 71.7<br>(69.8-73.7) | 24.2<br>(21.5-27.1) | 48.2<br>(45.8-50.5) | 33.7<br>(29.6-37.7) | 71.4<br>(68.9-73.7) | 29.1<br>(25.3-33.1) | 51.1<br>(48.2-54.0) |
| <b>Iceland</b>     | 21.3<br>(18.0-24.6) | 66.7<br>(64.2-69.3) | 18.0<br>(15.0-21.1) | 52.1<br>(49.2-55.1) | 21.2<br>(18.1-24.7) | 67.1<br>(64.3-69.6) | 18.0<br>(15.0-21.1) | 52.4<br>(49.5-55.5) | 22.9<br>(19.7-26.5) | 70.3<br>(67.7-72.7) | 19.6<br>(16.3-23.3) | 56.4<br>(53.5-59.4) | 26.4<br>(22.7-30.2) | 73.6<br>(71.3-75.8) | 23.0<br>(19.7-26.6) | 60.9<br>(58.0-63.8) |
| <b>Ireland</b>     | 24.6<br>(21.1-28.0) | 56.2<br>(53.5-59.0) | 24.6<br>(20.9-28.6) | 43.6<br>(40.7-46.4) | 25.0<br>(21.3-28.8) | 58.9<br>(56.2-61.7) | 25.4<br>(21.4-29.1) | 45.1<br>(42.5-47.8) | 25.4<br>(22.6-28.3) | 64.8<br>(62.2-67.3) | 27.0<br>(23.9-30.2) | 50.0<br>(47.3-52.7) | 26.6<br>(23.2-30.8) | 66.4<br>(63.9-68.8) | 26.5<br>(22.9-30.5) | 50.9<br>(48.3-53.6) |
| <b>Israel</b>      | 16.9<br>(14.3-20.1) | 50.6<br>(47.6-53.6) | 13.3<br>(10.8-16.0) | 45.3<br>(42.4-48.1) | 19.3<br>(16.2-22.8) | 54.6<br>(52.0-57.1) | 15.2<br>(12.5-18.2) | 49.2<br>(46.5-52.1) | 24.8<br>(21.1-28.9) | 58.3<br>(55.9-60.5) | 19.5<br>(16.2-23.1) | 52.9<br>(50.9-55.1) | 31.0<br>(27.0-35.6) | 60.4<br>(57.6-63.2) | 26.6<br>(22.6-31.1) | 52.7<br>(49.6-55.6) |
| <b>Italy</b>       | 27.8<br>(23.8-32.2) | 54.5<br>(51.5-57.5) | 22.0<br>(18.2-25.7) | 38.0<br>(35.3-40.8) | 29.0<br>(25.1-33.3) | 56.3<br>(53.4-59.0) | 23.1<br>(19.2-26.8) | 39.2<br>(36.7-41.8) | 29.0<br>(26.2-32.1) | 58.3<br>(55.8-60.8) | 23.6<br>(20.8-26.5) | 41.6<br>(39.0-44.2) | 29.9<br>(26.4-33.9) | 58.3<br>(55.5-61.1) | 24.3<br>(21.0-27.9) | 41.4<br>(38.9-44.2) |
| <b>Luxembourg</b>  | 17.3<br>(14.6-20.4) | 51.0<br>(48.3-53.7) | 10.6<br>(8.6-13.0)  | 36.3<br>(33.5-39.0) | 20.1<br>(16.8-23.6) | 54.0<br>(51.0-56.8) | 12.4<br>(10.2-14.8) | 39.3<br>(36.7-42.0) | 26.5<br>(22.8-30.4) | 56.4<br>(53.6-59.1) | 16.9<br>(13.9-19.9) | 43.1<br>(40.3-46.1) | 29.3<br>(25.3-33.4) | 58.0<br>(55.1-60.8) | 17.7<br>(14.5-21.1) | 44.4<br>(41.6-47.2) |
| <b>Malta</b>       | 31.2<br>(26.8-35.6) | 68.0<br>(65.2-70.6) | 19.0<br>(15.6-22.5) | 51.0<br>(48.3-53.9) | 30.9<br>(26.8-35.6) | 68.3<br>(65.7-70.9) | 19.3<br>(16.1-23.0) | 51.3<br>(48.5-54.0) | 32.9<br>(28.5-37.3) | 72.0<br>(69.6-74.6) | 22.8<br>(19.3-26.3) | 55.2<br>(52.3-58.1) | 33.6<br>(29.3-38.0) | 74.0<br>(71.6-76.4) | 25.3<br>(21.6-29.3) | 57.8<br>(55.0-60.6) |
| <b>Netherlands</b> | 14.4<br>(11.9-17.2) | 48.9<br>(45.9-51.8) | 14.1<br>(11.6-17.0) | 42.4<br>(39.5-45.3) | 15.2<br>(12.8-18.1) | 50.5<br>(47.8-53.2) | 14.9<br>(12.2-17.7) | 43.1<br>(40.3-46.0) | 16.5<br>(14.1-19.2) | 49.9<br>(48.7-51.1) | 15.3<br>(12.8-18.1) | 40.8<br>(39.4-42.2) | 18.3<br>(15.7-21.3) | 53.2<br>(51.1-55.4) | 16.1<br>(13.4-18.9) | 44.9<br>(42.3-47.5) |
| <b>Norway</b>      | 17.5<br>(14.7-20.6) | 48.9<br>(46.0-51.6) | 13.3<br>(10.7-15.9) | 39.0<br>(36.3-41.9) | 18.1<br>(15.1-21.2) | 50.3<br>(47.5-53.0) | 13.8<br>(11.4-16.3) | 40.6<br>(37.6-43.4) | 19.2<br>(16.5-22.1) | 54.2<br>(51.3-57.0) | 14.6<br>(12.3-17.0) | 45.0<br>(42.1-48.1) | 20.1<br>(17.2-23.0) | 58.4<br>(55.7-61.0) | 16.0<br>(13.4-18.7) | 47.3<br>(44.4-50.2) |
| <b>Portugal</b>    | 19.9<br>(16.8-23.5) | 52.4<br>(49.5-55.2) | 18.0<br>(15.0-21.5) | 44.1<br>(41.1-46.9) | 24.7<br>(21.0-28.7) | 58.8<br>(56.1-61.8) | 21.8<br>(18.3-26.0) | 49.7<br>(46.6-52.7) | 27.3<br>(23.9-31.0) | 61.8<br>(59.3-64.4) | 25.1<br>(21.7-28.8) | 52.4<br>(49.7-55.3) | 28.7<br>(24.9-32.8) | 63.8<br>(61.2-66.4) | 27.1<br>(23.4-31.4) | 54.6<br>(51.7-57.6) |
| <b>Spain</b>       | 20.2<br>(17.1-23.5) | 51.5<br>(48.7-54.2) | 17.6<br>(14.6-20.8) | 40.8<br>(38.3-43.4) | 23.9<br>(20.5-27.4) | 55.5<br>(53.2-57.6) | 20.2<br>(16.9-23.6) | 44.2<br>(41.9-46.4) | 28.3<br>(25.6-31.4) | 63.4<br>(61.7-64.9) | 23.3<br>(20.3-26.3) | 48.1<br>(46.2-50.0) | 27.6<br>(23.9-31.2) | 62.3<br>(60.0-64.9) | 23.8<br>(20.2-27.4) | 46.5<br>(43.7-48.9) |
| <b>Sweden</b>      | 16.4<br>(14.7-18.2) | 53.2<br>(50.4-56.0) | 17.4<br>(15.6-19.5) | 40.6<br>(37.8-43.4) | 14.3<br>(12.4-16.6) | 53.5<br>(50.8-56.2) | 15.0<br>(12.7-17.4) | 41.1<br>(38.4-43.9) | 16.6<br>(15.1-18.1) | 56.6<br>(53.7-59.2) | 16.9<br>(15.4-18.7) | 43.8<br>(41.0-46.7) | 20.4<br>(17.5-23.4) | 58.2<br>(55.6-61.0) | 19.3<br>(16.5-22.5) | 45.8<br>(43.2-48.5) |
| <b>Switzerland</b> | 19.0<br>(15.9-22.5) | 52.4<br>(49.6-55.2) | 15.5<br>(12.7-18.7) | 35.0<br>(32.4-37.7) | 18.3<br>(15.4-21.7) | 51.7<br>(48.8-54.6) | 15.0<br>(12.3-17.8) | 34.4<br>(31.8-37.1) | 18.1<br>(15.4-21.3) | 53.6<br>(50.9-56.3) | 14.9<br>(12.5-17.7) | 36.9<br>(34.2-39.4) | 20.7<br>(17.4-24.4) | 56.6<br>(53.7-59.4) | 16.2<br>(13.4-19.4) | 39.9<br>(37.0-42.9) |

| Country/Region                    | Males, 1980         |                     | Females, 1980       |                     | Males, 1990         |                     | Females, 1990       |                     | Males, 2000         |                     | Females, 2000       |                     | Males, 2013         |                     | Females, 2013       |                     |
|-----------------------------------|---------------------|---------------------|---------------------|---------------------|---------------------|---------------------|---------------------|---------------------|---------------------|---------------------|---------------------|---------------------|---------------------|---------------------|---------------------|---------------------|
|                                   | <20                 | >20                 | <20                 | >20                 | <20                 | >20                 | <20                 | >20                 | <20                 | >20                 | <20                 | >20                 | <20                 | >20                 | <20                 | >20                 |
| <b>United Kingdom</b>             | 17.6<br>(14.8-20.7) | 53.8<br>(51.4-56.4) | 21.0<br>(17.8-24.7) | 43.8<br>(41.0-46.5) | 17.5<br>(15.4-19.6) | 55.9<br>(54.4-57.3) | 21.0<br>(18.6-23.5) | 45.3<br>(43.7-46.7) | 21.9<br>(20.9-23.0) | 64.4<br>(63.6-65.2) | 26.2<br>(25.0-27.5) | 53.7<br>(52.8-54.6) | 26.1<br>(23.8-28.5) | 66.6<br>(65.3-68.0) | 29.2<br>(26.8-31.9) | 57.2<br>(55.7-58.6) |
| <b>Western Sub-Saharan Africa</b> | 6.2<br>(5.6-6.9)    | 19.6<br>(18.6-20.6) | 7.1<br>(6.5-7.9)    | 20.9<br>(19.9-21.9) | 7.2<br>(6.6-8.0)    | 22.5<br>(21.3-23.6) | 8.2<br>(7.4-9.1)    | 23.1<br>(22.0-24.2) | 10.2<br>(9.3-11.2)  | 29.8<br>(28.5-31.2) | 11.3<br>(10.3-12.4) | 29.7<br>(28.6-30.7) | 11.0<br>(9.9-12.1)  | 32.6<br>(31.1-34.0) | 12.3<br>(11.3-13.5) | 34.5<br>(33.3-35.6) |
| <b>Benin</b>                      | 4.0<br>(3.2-5.0)    | 6.4<br>(5.6-7.2)    | 4.6<br>(3.7-5.6)    | 18.1<br>(16.5-20.0) | 4.6<br>(3.7-5.7)    | 7.4<br>(6.6-8.2)    | 5.4<br>(4.3-6.6)    | 20.3<br>(18.4-22.2) | 5.1<br>(4.2-5.9)    | 8.2<br>(7.4-9.2)    | 9.1<br>(7.5-10.9)   | 26.2<br>(24.4-28.2) | 6.9<br>(5.6-8.4)    | 9.4<br>(8.4-10.4)   | 13.1<br>(10.7-15.7) | 29.9<br>(27.6-32.4) |
| <b>Burkina Faso</b>               | 5.3<br>(4.4-6.4)    | 19.4<br>(17.5-21.3) | 4.3<br>(3.4-5.4)    | 6.1<br>(5.5-6.9)    | 7.2<br>(6.1-8.6)    | 25.0<br>(22.9-27.3) | 5.7<br>(4.6-6.9)    | 7.8<br>(7.1-8.7)    | 9.0<br>(7.6-10.7)   | 29.9<br>(27.5-32.6) | 7.2<br>(5.9-8.6)    | 10.1<br>(9.2-11.0)  | 9.1<br>(7.6-10.9)   | 31.3<br>(28.8-33.8) | 8.7<br>(7.3-10.6)   | 15.4<br>(14.1-16.9) |
| <b>Cameroon</b>                   | 13.5<br>(11.2-16.0) | 32.8<br>(30.2-35.4) | 13.3<br>(10.9-15.8) | 41.7<br>(39.2-44.5) | 12.9<br>(10.9-15.1) | 31.7<br>(29.4-34.1) | 12.7<br>(10.5-15.1) | 41.0<br>(38.5-43.7) | 15.9<br>(13.6-18.1) | 35.8<br>(34.0-37.6) | 16.4<br>(13.6-19.2) | 47.2<br>(45.5-49.1) | 16.4<br>(14.1-19.0) | 40.4<br>(37.8-43.1) | 19.8<br>(16.8-23.1) | 50.7<br>(48.4-53.0) |
| <b>Cape Verde</b>                 | 7.5<br>(6.2-9.2)    | 22.4<br>(20.3-24.5) | 12.8<br>(10.3-15.6) | 33.6<br>(31.1-36.3) | 9.3<br>(7.7-11.0)   | 26.7<br>(24.3-29.0) | 15.3<br>(12.6-18.3) | 38.1<br>(35.4-41.0) | 9.8<br>(8.1-11.7)   | 28.4<br>(26.3-30.9) | 16.0<br>(13.2-19.2) | 40.3<br>(37.4-43.1) | 11.5<br>(9.6-13.7)  | 31.8<br>(29.4-34.3) | 18.3<br>(15.0-21.7) | 44.0<br>(41.3-47.0) |
| <b>Chad</b>                       | 5.9<br>(4.8-7.1)    | 21.1<br>(19.3-23.1) | 5.6<br>(4.4-6.9)    | 7.1<br>(6.3-8.0)    | 6.1<br>(5.1-7.3)    | 21.8<br>(19.9-23.9) | 5.8<br>(4.6-7.1)    | 7.4<br>(6.6-8.2)    | 7.4<br>(6.3-8.7)    | 26.2<br>(24.1-28.5) | 7.2<br>(6.0-8.7)    | 10.3<br>(9.4-11.4)  | 8.3<br>(6.9-9.9)    | 28.2<br>(25.8-30.5) | 8.3<br>(6.7-10.1)   | 12.4<br>(11.1-13.8) |
| <b>Cote d'Ivoire</b>              | 6.0<br>(4.9-7.2)    | 14.5<br>(13.1-15.9) | 8.8<br>(7.3-10.5)   | 18.9<br>(17.1-20.9) | 5.2<br>(4.5-6.0)    | 13.3<br>(12.2-14.4) | 7.8<br>(6.9-8.9)    | 17.2<br>(15.9-18.5) | 7.1<br>(6.0-8.4)    | 22.2<br>(20.2-24.1) | 10.6<br>(8.9-12.4)  | 29.8<br>(27.7-31.7) | 8.8<br>(7.3-10.4)   | 26.6<br>(24.3-29.0) | 13.3<br>(11.1-15.8) | 35.4<br>(33.1-37.8) |
| <b>Ghana</b>                      | 3.1<br>(2.5-3.7)    | 12.8<br>(11.5-14.3) | 4.9<br>(3.9-5.9)    | 14.3<br>(12.8-15.8) | 3.6<br>(2.9-4.3)    | 14.9<br>(13.4-16.6) | 5.7<br>(4.7-6.9)    | 16.0<br>(14.5-17.7) | 5.0<br>(4.2-5.9)    | 21.4<br>(19.4-23.5) | 8.9<br>(7.4-10.7)   | 26.7<br>(25.0-28.5) | 5.3<br>(4.4-6.4)    | 27.9<br>(25.7-30.1) | 11.5<br>(9.6-13.8)  | 38.4<br>(36.0-41.1) |
| <b>Guinea</b>                     | 8.3<br>(6.9-10.0)   | 13.5<br>(12.1-14.9) | 10.2<br>(8.5-12.5)  | 21.9<br>(20.0-23.9) | 8.2<br>(6.7-9.9)    | 13.4<br>(12.0-14.8) | 9.7<br>(7.9-11.8)   | 20.9<br>(19.1-22.8) | 7.9<br>(6.7-9.2)    | 14.0<br>(12.6-15.5) | 10.1<br>(8.6-11.8)  | 23.4<br>(21.8-25.2) | 8.2<br>(6.8-9.9)    | 15.4<br>(13.8-16.9) | 11.7<br>(9.6-14.3)  | 29.1<br>(26.9-31.6) |
| <b>Guinea-Bissau</b>              | 6.9<br>(5.7-8.4)    | 23.9<br>(21.9-26.1) | 9.8<br>(8.0-12.1)   | 28.4<br>(25.8-30.8) | 8.2<br>(6.8-10.0)   | 27.4<br>(25.0-29.8) | 11.3<br>(9.2-13.7)  | 31.7<br>(29.2-34.2) | 10.9<br>(9.1-13.1)  | 34.6<br>(32.0-37.2) | 14.6<br>(12.0-17.2) | 39.0<br>(36.1-42.1) | 15.8<br>(13.3-18.5) | 44.0<br>(41.1-46.9) | 20.4<br>(17.2-23.8) | 47.8<br>(44.8-50.8) |
| <b>Liberia</b>                    | 12.8<br>(10.7-15.1) | 39.3<br>(36.5-42.1) | 12.9<br>(10.6-15.5) | 39.1<br>(36.7-41.6) | 12.0<br>(10.0-14.2) | 37.8<br>(35.0-40.4) | 12.2<br>(10.0-14.7) | 37.9<br>(35.6-40.4) | 12.1<br>(10.2-14.3) | 38.1<br>(35.4-40.8) | 12.1<br>(9.9-14.6)  | 42.4<br>(40.0-44.7) | 13.4<br>(11.1-16.0) | 40.6<br>(37.9-43.4) | 13.7<br>(11.3-16.5) | 49.4<br>(46.8-52.1) |
| <b>Mali</b>                       | 3.3<br>(2.7-4.1)    | 16.3<br>(14.8-17.9) | 3.4<br>(2.7-4.1)    | 22.9<br>(21.3-24.6) | 5.1<br>(4.2-6.0)    | 20.7<br>(18.8-22.7) | 4.8<br>(3.9-5.8)    | 26.7<br>(24.9-28.3) | 8.0<br>(6.8-9.3)    | 23.8<br>(21.8-25.9) | 8.4<br>(6.9-10.0)   | 35.4<br>(33.7-37.3) | 10.4<br>(8.6-12.3)  | 29.1<br>(26.8-31.6) | 12.8<br>(10.7-15.4) | 46.8<br>(44.4-49.2) |
| <b>Mauritania</b>                 | 4.5<br>(3.6-5.4)    | 16.6<br>(15.0-18.4) | 11.1<br>(9.1-13.4)  | 43.0<br>(40.1-45.9) | 5.6<br>(4.6-6.8)    | 20.1<br>(18.4-22.1) | 13.3<br>(11.0-15.8) | 48.3<br>(45.2-51.4) | 5.9<br>(4.9-7.0)    | 21.5<br>(19.4-23.4) | 14.4<br>(12.3-16.8) | 53.3<br>(51.3-55.1) | 5.7<br>(4.7-6.8)    | 21.4<br>(19.5-23.4) | 14.2<br>(11.5-17.1) | 55.7<br>(52.9-58.8) |

| Country/Region               | Males, 1980        |                     | Females, 1980       |                     | Males, 1990         |                     | Females, 1990       |                     | Males, 2000         |                     | Females, 2000       |                     | Males, 2013         |                     | Females, 2013       |                     |
|------------------------------|--------------------|---------------------|---------------------|---------------------|---------------------|---------------------|---------------------|---------------------|---------------------|---------------------|---------------------|---------------------|---------------------|---------------------|---------------------|---------------------|
|                              | <20                | >20                 | <20                 | >20                 | <20                 | >20                 | <20                 | >20                 | <20                 | >20                 | <20                 | >20                 | <20                 | >20                 | <20                 | >20                 |
| <b>Niger</b>                 | 6.5<br>(5.3-8.0)   | 17.4<br>(15.6-19.2) | 4.1<br>(3.2-5.0)    | 15.7<br>(14.2-17.4) | 6.7<br>(5.5-8.1)    | 17.8<br>(15.9-19.5) | 4.1<br>(3.3-5.0)    | 15.9<br>(14.6-17.4) | 9.0<br>(7.4-10.8)   | 20.2<br>(18.4-22.1) | 5.3<br>(4.4-6.4)    | 20.7<br>(19.1-22.3) | 11.8<br>(9.8-14.2)  | 23.7<br>(21.5-25.8) | 7.9<br>(6.4-9.5)    | 27.8<br>(25.8-29.7) |
| <b>Nigeria</b>               | 6.0<br>(4.9-7.2)   | 21.3<br>(19.4-23.2) | 6.7<br>(5.5-8.5)    | 20.1<br>(18.2-22.1) | 7.7<br>(6.5-9.2)    | 26.3<br>(24.0-28.5) | 8.6<br>(7.0-10.3)   | 24.0<br>(21.8-26.3) | 12.3<br>(10.5-14.5) | 37.3<br>(34.7-40.0) | 12.8<br>(10.7-15.1) | 30.5<br>(28.4-32.5) | 12.8<br>(10.7-15.1) | 39.5<br>(36.7-42.3) | 12.3<br>(10.1-14.7) | 33.6<br>(31.3-35.9) |
| <b>Sao Tome and Principe</b> | 7.4<br>(6.1-8.9)   | 19.6<br>(17.8-21.6) | 12.2<br>(10.2-14.7) | 32.8<br>(30.1-35.4) | 8.1<br>(6.7-9.8)    | 21.3<br>(19.2-23.3) | 13.2<br>(10.8-15.6) | 34.8<br>(32.1-37.4) | 9.7<br>(8.2-11.6)   | 25.4<br>(23.4-27.6) | 15.4<br>(12.6-18.2) | 39.9<br>(37.4-42.8) | 12.3<br>(10.3-14.4) | 30.6<br>(28.4-33.0) | 18.9<br>(16.0-22.0) | 45.7<br>(43.1-48.3) |
| <b>Senegal</b>               | 5.1<br>(4.1-6.2)   | 13.8<br>(12.3-15.2) | 7.3<br>(6.0-9.0)    | 23.3<br>(21.2-25.5) | 5.0<br>(4.2-6.0)    | 14.0<br>(12.7-15.5) | 7.2<br>(6.0-8.6)    | 23.9<br>(22.1-25.7) | 4.2<br>(3.5-4.9)    | 14.8<br>(13.4-16.4) | 7.7<br>(6.5-9.3)    | 32.5<br>(30.3-34.8) | 3.8<br>(3.1-4.6)    | 16.8<br>(15.5-18.2) | 8.3<br>(6.8-10.0)   | 37.4<br>(35.3-39.6) |
| <b>Sierra Leone</b>          | 11.2<br>(9.3-13.3) | 13.7<br>(12.3-15.1) | 14.9<br>(12.4-17.6) | 27.8<br>(25.4-30.2) | 11.4<br>(9.5-13.4)  | 14.0<br>(12.5-15.5) | 15.4<br>(12.6-18.1) | 28.6<br>(26.1-31.1) | 11.8<br>(10.1-13.8) | 15.2<br>(13.8-16.8) | 18.3<br>(15.4-21.5) | 30.9<br>(28.5-33.5) | 13.8<br>(11.8-15.8) | 16.4<br>(15.1-17.8) | 23.3<br>(19.7-26.7) | 32.9<br>(30.7-35.2) |
| <b>The Gambia</b>            | 10.2<br>(8.6-12.0) | 23.2<br>(21.0-25.3) | 16.9<br>(13.8-20.1) | 36.6<br>(33.8-39.3) | 12.2<br>(10.2-14.3) | 26.1<br>(23.8-28.5) | 19.0<br>(15.8-22.6) | 38.9<br>(36.2-41.7) | 11.4<br>(9.9-13.2)  | 28.2<br>(25.9-30.6) | 17.3<br>(14.8-20.2) | 41.6<br>(38.8-44.4) | 10.1<br>(8.3-12.1)  | 34.3<br>(31.7-36.9) | 14.8<br>(12.2-17.9) | 48.7<br>(45.9-51.6) |
| <b>Togo</b>                  | 4.0<br>(3.3-4.9)   | 14.1<br>(12.7-15.6) | 5.4<br>(4.4-6.6)    | 15.2<br>(13.7-16.8) | 4.4<br>(3.7-5.2)    | 14.7<br>(13.2-16.2) | 5.7<br>(4.6-6.8)    | 15.8<br>(14.3-17.5) | 6.4<br>(5.4-7.4)    | 17.3<br>(15.6-19.1) | 7.5<br>(6.1-9.0)    | 22.3<br>(20.5-24.1) | 5.7<br>(4.7-6.7)    | 18.8<br>(17.3-20.3) | 8.8<br>(7.3-10.6)   | 32.2<br>(30.1-34.5) |

Webtable 10: Prevalence of obesity

| Country/Region              | Males, 1980      |                    | Females, 1980    |                     | Males, 1990      |                    | Females, 1990    |                     | Males, 2000      |                    | Females, 2000    |                     | Males, 2013      |                    | Females, 2013    |                     |
|-----------------------------|------------------|--------------------|------------------|---------------------|------------------|--------------------|------------------|---------------------|------------------|--------------------|------------------|---------------------|------------------|--------------------|------------------|---------------------|
|                             | <20              | >20                | <20              | >20                 | <20              | >20                | <20              | >20                 | <20              | >20                | <20              | >20                 | <20              | >20                | <20              | >20                 |
| <b>Andean Latin America</b> | 3.9<br>(3.4-4.5) | 7.8<br>(7.2-8.4)   | 4.0<br>(3.5-4.6) | 15.7<br>(14.7-16.9) | 4.0<br>(3.5-4.6) | 7.9<br>(7.3-8.5)   | 4.1<br>(3.6-4.7) | 16.3<br>(15.3-17.3) | 4.1<br>(3.6-4.6) | 7.8<br>(7.2-8.4)   | 4.2<br>(3.7-4.8) | 19.7<br>(18.7-20.8) | 3.7<br>(3.3-4.2) | 8.5<br>(7.8-9.1)   | 4.4<br>(3.8-4.9) | 23.4<br>(22.2-24.6) |
| <b>Bolivia</b>              | 4.8<br>(3.9-5.9) | 10.4<br>(9.3-11.7) | 4.7<br>(3.7-5.9) | 14.5<br>(12.8-16.1) | 4.8<br>(4.0-5.8) | 10.4<br>(9.2-11.7) | 4.7<br>(3.8-5.8) | 14.5<br>(13.0-16.2) | 4.9<br>(4.0-5.8) | 10.4<br>(9.2-11.6) | 4.6<br>(3.8-5.5) | 19.5<br>(17.9-21.4) | 4.6<br>(3.7-5.5) | 10.2<br>(9.1-11.4) | 4.7<br>(3.7-5.7) | 24.5<br>(22.4-26.8) |
| <b>Ecuador</b>              | 2.6<br>(2.1-3.2) | 5.8<br>(5.1-6.6)   | 3.8<br>(3.0-4.8) | 16.2<br>(14.4-18.2) | 2.8<br>(2.2-3.5) | 6.3<br>(5.5-7.1)   | 4.2<br>(3.2-5.2) | 17.6<br>(15.7-19.8) | 2.9<br>(2.3-3.6) | 6.5<br>(5.7-7.3)   | 4.4<br>(3.5-5.4) | 18.7<br>(17.0-20.4) | 3.1<br>(2.4-3.7) | 6.9<br>(6.1-7.7)   | 4.6<br>(3.7-5.8) | 19.8<br>(17.6-22.0) |
| <b>Peru</b>                 | 4.2<br>(3.4-5.2) | 7.9<br>(7.0-8.8)   | 3.8<br>(3.1-4.8) | 15.9<br>(14.2-17.7) | 4.3<br>(3.5-5.2) | 7.9<br>(7.0-9.0)   | 3.9<br>(3.2-4.9) | 16.2<br>(14.7-17.7) | 4.3<br>(3.6-5.2) | 7.7<br>(6.8-8.6)   | 3.9<br>(3.3-4.8) | 20.3<br>(18.8-21.8) | 3.8<br>(3.1-4.5) | 8.8<br>(7.7-9.8)   | 4.1<br>(3.3-4.9) | 24.9<br>(23.1-26.6) |



| Country/Region             | Males, 1980       |                     | Females, 1980       |                     | Males, 1990       |                     | Females, 1990       |                     | Males, 2000       |                     | Females, 2000       |                     | Males, 2013       |                     | Females, 2013       |                     |
|----------------------------|-------------------|---------------------|---------------------|---------------------|-------------------|---------------------|---------------------|---------------------|-------------------|---------------------|---------------------|---------------------|-------------------|---------------------|---------------------|---------------------|
|                            | <20               | >20                 | <20                 | >20                 | <20               | >20                 | <20                 | >20                 | <20               | >20                 | <20                 | >20                 | <20               | >20                 | <20                 | >20                 |
| <b>Australasia</b>         | 3.7<br>(3.2-4.4)  | 14.7<br>(13.5-16.2) | 3.7<br>(3.1-4.4)    | 16.5<br>(15.1-18.0) | 4.6<br>(3.9-5.4)  | 14.9<br>(14.0-15.9) | 4.4<br>(3.7-5.4)    | 16.4<br>(15.3-17.5) | 6.4<br>(5.7-7.1)  | 21.2<br>(19.9-22.4) | 6.0<br>(5.3-6.7)    | 23.3<br>(22.0-24.8) | 7.5<br>(6.5-8.6)  | 27.6<br>(25.5-29.6) | 7.6<br>(6.4-9.0)    | 29.8<br>(27.7-32.0) |
| <b>Australia</b>           | 3.6<br>(2.9-4.3)  | 15.1<br>(13.6-16.8) | 3.5<br>(2.8-4.4)    | 16.6<br>(14.9-18.3) | 4.4<br>(3.7-5.3)  | 15.1<br>(14.0-16.2) | 4.3<br>(3.4-5.4)    | 16.1<br>(14.9-17.3) | 6.1<br>(5.2-7.0)  | 21.4<br>(19.8-22.9) | 5.6<br>(4.8-6.5)    | 23.5<br>(21.8-25.2) | 7.0<br>(5.8-8.2)  | 27.5<br>(25.2-29.8) | 7.3<br>(5.9-8.9)    | 29.8<br>(27.3-32.4) |
| <b>New Zealand</b>         | 4.6<br>(3.7-5.7)  | 12.9<br>(11.5-14.3) | 4.4<br>(3.4-5.4)    | 16.3<br>(14.6-18.3) | 5.5<br>(4.5-6.6)  | 14.1<br>(12.7-15.6) | 5.2<br>(4.1-6.4)    | 17.9<br>(16.3-19.7) | 7.8<br>(6.8-9.0)  | 20.2<br>(18.8-21.6) | 7.5<br>(6.4-8.6)    | 22.6<br>(21.4-24.0) | 9.7<br>(8.4-11.4) | 28.1<br>(26.3-29.9) | 9.0<br>(7.6-10.6)   | 30.0<br>(28.1-31.9) |
| <b>Caribbean</b>           | 4.2<br>(3.7-4.7)  | 10.9<br>(10.3-11.7) | 5.3<br>(4.7-6.0)    | 19.8<br>(18.6-21.0) | 4.0<br>(3.6-4.4)  | 10.8<br>(10.0-11.5) | 5.0<br>(4.5-5.6)    | 19.7<br>(18.6-20.8) | 4.2<br>(3.9-4.7)  | 11.1<br>(10.5-11.8) | 5.7<br>(5.2-6.3)    | 22.0<br>(20.9-23.2) | 4.5<br>(4.1-4.9)  | 12.3<br>(11.5-13.1) | 6.6<br>(5.9-7.3)    | 24.5<br>(23.4-25.9) |
| <b>Antigua and Barbuda</b> | 3.4<br>(2.7-4.2)  | 7.8<br>(7.0-8.8)    | 4.9<br>(3.8-6.1)    | 16.0<br>(14.4-17.9) | 4.2<br>(3.3-5.2)  | 9.5<br>(8.5-10.7)   | 6.1<br>(4.8-7.6)    | 18.9<br>(16.9-21.2) | 3.9<br>(3.1-4.8)  | 8.9<br>(7.9-10.0)   | 5.9<br>(4.6-7.2)    | 18.3<br>(16.4-20.4) | 4.5<br>(3.6-5.6)  | 10.1<br>(8.9-11.4)  | 6.7<br>(5.3-8.2)    | 20.5<br>(18.4-22.7) |
| <b>Barbados</b>            | 7.6<br>(6.2-9.2)  | 16.3<br>(14.7-18.1) | 12.5<br>(10.1-15.3) | 25.3<br>(22.8-27.9) | 7.9<br>(6.4-9.5)  | 16.9<br>(15.5-18.7) | 13.1<br>(10.6-15.9) | 26.7<br>(24.5-29.2) | 7.6<br>(6.1-9.1)  | 15.6<br>(14.2-17.0) | 12.9<br>(10.6-15.8) | 30.0<br>(28.1-32.1) | 8.7<br>(7.0-10.5) | 18.1<br>(16.4-20.0) | 14.9<br>(12.0-17.9) | 33.0<br>(30.6-35.8) |
| <b>Belize</b>              | 9.1<br>(7.3-11.1) | 20.8<br>(18.8-23.0) | 12.2<br>(9.8-15.0)  | 38.5<br>(35.3-41.6) | 9.1<br>(7.4-11.1) | 20.7<br>(18.6-22.9) | 12.3<br>(9.9-15.1)  | 38.7<br>(35.5-41.9) | 8.9<br>(7.2-10.9) | 22.1<br>(20.0-24.1) | 12.5<br>(9.9-15.2)  | 41.5<br>(38.7-44.3) | 7.9<br>(6.4-9.5)  | 23.0<br>(20.9-25.3) | 11.6<br>(9.3-14.2)  | 42.7<br>(39.5-45.8) |
| <b>Cuba</b>                | 6.0<br>(4.8-7.3)  | 13.4<br>(12.0-14.9) | 8.4<br>(6.8-10.3)   | 25.2<br>(22.7-28.0) | 5.9<br>(4.7-7.2)  | 13.1<br>(11.6-14.6) | 8.4<br>(6.7-10.4)   | 24.8<br>(22.4-27.3) | 6.4<br>(5.2-7.8)  | 13.9<br>(12.4-15.5) | 9.2<br>(7.4-11.2)   | 26.5<br>(23.9-29.2) | 7.4<br>(6.1-9.0)  | 16.0<br>(14.4-17.8) | 10.7<br>(8.5-13.0)  | 29.7<br>(26.9-32.6) |
| <b>Dominica</b>            | 2.6<br>(2.1-3.2)  | 6.5<br>(5.7-7.3)    | 7.2<br>(5.7-8.8)    | 27.2<br>(24.4-30.0) | 3.7<br>(3.0-4.5)  | 8.8<br>(7.8-10.0)   | 9.8<br>(7.8-12.0)   | 33.7<br>(30.9-36.8) | 4.1<br>(3.3-5.0)  | 9.5<br>(8.5-10.6)   | 10.9<br>(8.8-13.3)  | 36.4<br>(33.7-39.2) | 4.6<br>(3.7-5.7)  | 10.7<br>(9.7-11.9)  | 12.2<br>(9.9-14.9)  | 39.4<br>(36.8-42.1) |
| <b>Dominican Republic</b>  | 2.5<br>(2.0-3.0)  | 8.0<br>(7.0-9.1)    | 2.7<br>(2.1-3.3)    | 15.2<br>(13.5-17.0) | 2.7<br>(2.2-3.3)  | 8.2<br>(7.3-9.4)    | 3.1<br>(2.5-3.8)    | 15.8<br>(14.3-17.5) | 3.6<br>(3.0-4.4)  | 8.9<br>(7.9-10.1)   | 5.3<br>(4.3-6.4)    | 18.8<br>(17.2-20.7) | 4.3<br>(3.5-5.3)  | 10.3<br>(9.1-11.7)  | 7.3<br>(5.9-9.1)    | 20.9<br>(18.8-23.4) |
| <b>Grenada</b>             | 3.9<br>(3.1-4.8)  | 9.0<br>(7.9-10.2)   | 5.7<br>(4.5-7.0)    | 18.1<br>(16.1-20.1) | 4.3<br>(3.5-5.3)  | 9.8<br>(8.7-11.0)   | 6.3<br>(5.0-7.8)    | 19.6<br>(17.4-22.0) | 4.2<br>(3.4-5.2)  | 9.5<br>(8.5-10.7)   | 6.3<br>(4.9-8.0)    | 19.5<br>(17.5-21.6) | 4.7<br>(3.8-5.9)  | 10.5<br>(9.4-11.8)  | 7.0<br>(5.5-8.7)    | 21.3<br>(19.0-23.6) |
| <b>Guyana</b>              | 3.5<br>(2.8-4.4)  | 9.7<br>(8.5-10.8)   | 5.4<br>(4.3-6.7)    | 26.0<br>(23.6-28.6) | 3.7<br>(3.0-4.5)  | 9.9<br>(8.8-11.0)   | 5.5<br>(4.3-6.8)    | 26.5<br>(23.8-29.3) | 4.3<br>(3.5-5.3)  | 11.2<br>(10.1-12.6) | 7.2<br>(5.7-8.8)    | 29.8<br>(27.2-32.7) | 4.5<br>(3.6-5.4)  | 11.5<br>(10.4-12.7) | 8.6<br>(7.0-10.5)   | 30.4<br>(28.0-32.7) |
| <b>Haiti</b>               | 3.0<br>(2.4-3.7)  | 7.1<br>(6.2-7.9)    | 2.4<br>(1.8-3.1)    | 6.7<br>(5.9-7.6)    | 2.8<br>(2.3-3.4)  | 6.6<br>(5.8-7.4)    | 2.3<br>(1.8-2.9)    | 6.4<br>(5.6-7.2)    | 2.5<br>(2.1-3.1)  | 5.8<br>(5.1-6.6)    | 1.9<br>(1.5-2.4)    | 9.6<br>(8.6-10.6)   | 2.1<br>(1.7-2.6)  | 5.0<br>(4.4-5.6)    | 2.0<br>(1.6-2.5)    | 12.2<br>(11.2-13.4) |
| <b>Jamaica</b>             | 3.6<br>(2.8-4.5)  | 7.9<br>(6.9-8.9)    | 7.7<br>(6.1-9.5)    | 23.2<br>(20.6-25.8) | 3.7<br>(3.0-4.5)  | 8.0<br>(7.0-9.0)    | 7.9<br>(6.2-9.6)    | 23.6<br>(21.0-26.1) | 4.5<br>(3.7-5.6)  | 8.8<br>(7.8-9.9)    | 9.5<br>(7.6-11.6)   | 26.5<br>(24.2-29.0) | 5.3<br>(4.2-6.6)  | 10.6<br>(9.4-11.8)  | 10.9<br>(8.6-13.3)  | 32.0<br>(29.2-34.8) |

| Country/Region                          | Males, 1980        |                     | Females, 1980       |                     | Males, 1990        |                     | Females, 1990       |                     | Males, 2000        |                     | Females, 2000       |                     | Males, 2013         |                     | Females, 2013       |                     |
|-----------------------------------------|--------------------|---------------------|---------------------|---------------------|--------------------|---------------------|---------------------|---------------------|--------------------|---------------------|---------------------|---------------------|---------------------|---------------------|---------------------|---------------------|
|                                         | <20                | >20                 | <20                 | >20                 | <20                | >20                 | <20                 | >20                 | <20                | >20                 | <20                 | >20                 | <20                 | >20                 | <20                 | >20                 |
| <b>Saint Lucia</b>                      | 4.4<br>(3.6-5.4)   | 10.9<br>(9.7-12.2)  | 4.3<br>(3.4-5.3)    | 14.5<br>(12.8-16.3) | 5.2<br>(4.2-6.4)   | 12.6<br>(11.2-14.1) | 5.1<br>(4.0-6.3)    | 16.7<br>(14.8-18.6) | 5.8<br>(4.7-7.1)   | 13.7<br>(12.2-15.2) | 5.7<br>(4.6-6.9)    | 18.2<br>(16.3-20.3) | 6.2<br>(5.0-7.4)    | 14.4<br>(12.9-16.2) | 6.0<br>(4.7-7.5)    | 19.2<br>(17.3-21.5) |
| <b>Saint Vincent and the Grenadines</b> | 4.2<br>(3.3-5.1)   | 9.6<br>(8.5-10.8)   | 6.1<br>(4.8-7.5)    | 19.1<br>(17.0-21.2) | 4.4<br>(3.5-5.3)   | 9.8<br>(8.7-10.9)   | 6.3<br>(5.0-7.8)    | 19.6<br>(17.5-21.8) | 4.9<br>(3.9-6.0)   | 10.8<br>(9.6-12.1)  | 7.1<br>(5.6-8.7)    | 21.6<br>(19.3-24.0) | 6.0<br>(4.9-7.4)    | 13.3<br>(11.8-14.8) | 8.8<br>(7.0-10.9)   | 25.4<br>(23.0-28.0) |
| <b>Suriname</b>                         | 2.9<br>(2.3-3.7)   | 10.1<br>(8.9-11.3)  | 5.5<br>(4.2-7.1)    | 27.9<br>(25.3-30.6) | 3.2<br>(2.5-4.0)   | 10.9<br>(9.7-12.3)  | 6.1<br>(4.7-7.7)    | 29.8<br>(27.0-32.8) | 3.6<br>(2.9-4.4)   | 11.2<br>(9.9-12.5)  | 6.6<br>(5.2-8.4)    | 30.9<br>(28.1-33.8) | 4.2<br>(3.3-5.4)    | 12.5<br>(11.2-13.9) | 7.4<br>(5.8-9.2)    | 33.8<br>(30.7-36.8) |
| <b>The Bahamas</b>                      | 10.6<br>(8.7-12.8) | 22.1<br>(20.0-24.4) | 12.9<br>(10.5-15.7) | 35.6<br>(32.8-38.9) | 11.5<br>(9.4-13.9) | 23.6<br>(21.4-25.9) | 14.0<br>(11.0-17.0) | 37.5<br>(34.5-40.5) | 12.0<br>(9.5-14.7) | 24.2<br>(22.2-26.5) | 14.8<br>(12.0-18.1) | 39.0<br>(36.1-41.7) | 15.9<br>(12.9-18.9) | 30.9<br>(28.3-33.6) | 20.2<br>(16.6-24.2) | 47.7<br>(44.5-51.2) |
| <b>Trinidad and Tobago</b>              | 5.6<br>(4.5-6.9)   | 19.9<br>(17.9-22.0) | 2.5<br>(1.9-3.3)    | 33.4<br>(30.5-36.3) | 5.4<br>(4.3-6.7)   | 18.9<br>(17.0-21.2) | 3.0<br>(2.2-3.8)    | 32.6<br>(29.7-35.5) | 6.3<br>(5.0-7.8)   | 18.8<br>(16.9-20.7) | 5.9<br>(4.7-7.2)    | 33.0<br>(30.0-35.9) | 7.8<br>(6.3-9.4)    | 20.9<br>(19.3-22.5) | 7.2<br>(5.7-8.9)    | 36.2<br>(34.2-38.3) |
| <b>Central Asia</b>                     | 6.2<br>(5.4-7.1)   | 8.2<br>(7.8-8.6)    | 5.2<br>(4.5-6.0)    | 16.7<br>(15.9-17.5) | 6.9<br>(6.1-7.8)   | 9.0<br>(8.5-9.4)    | 5.7<br>(4.9-6.6)    | 18.0<br>(17.2-18.9) | 6.1<br>(5.4-6.8)   | 9.6<br>(9.2-10.1)   | 5.3<br>(4.7-6.1)    | 18.5<br>(17.8-19.3) | 6.8<br>(6.2-7.6)    | 12.6<br>(12.0-13.2) | 5.9<br>(5.3-6.7)    | 22.0<br>(21.1-22.9) |
| <b>Armenia</b>                          | 5.1<br>(4.0-6.5)   | 7.9<br>(7.0-8.9)    | 3.8<br>(2.9-4.9)    | 19.8<br>(17.8-21.9) | 5.4<br>(4.3-6.8)   | 8.4<br>(7.4-9.4)    | 4.0<br>(3.1-5.1)    | 20.6<br>(18.5-22.8) | 5.7<br>(4.7-7.1)   | 9.2<br>(8.2-10.3)   | 4.5<br>(3.6-5.4)    | 22.4<br>(20.7-24.3) | 7.3<br>(5.8-8.9)    | 11.4<br>(10.0-12.8) | 6.6<br>(5.2-8.2)    | 26.4<br>(24.1-28.8) |
| <b>Azerbaijan</b>                       | 3.5<br>(2.7-4.3)   | 4.8<br>(4.2-5.4)    | 3.4<br>(2.6-4.3)    | 19.1<br>(17.0-21.2) | 3.7<br>(3.0-4.7)   | 5.2<br>(4.6-5.8)    | 3.6<br>(2.8-4.7)    | 20.5<br>(18.4-22.6) | 4.7<br>(3.8-5.8)   | 6.1<br>(5.4-6.8)    | 4.5<br>(3.6-5.7)    | 23.4<br>(21.4-25.6) | 8.3<br>(6.5-10.4)   | 9.0<br>(8.0-10.0)   | 7.9<br>(6.2-9.9)    | 30.4<br>(28.2-32.8) |
| <b>Georgia</b>                          | 5.6<br>(4.5-6.9)   | 10.8<br>(9.5-12.1)  | 7.0<br>(5.5-8.8)    | 15.0<br>(13.3-16.7) | 5.8<br>(4.7-7.3)   | 11.2<br>(9.9-12.6)  | 7.3<br>(5.8-9.2)    | 15.6<br>(14.0-17.5) | 8.3<br>(6.7-10.1)  | 15.7<br>(14.0-17.3) | 10.0<br>(8.1-12.3)  | 21.0<br>(18.9-23.1) | 10.7<br>(8.9-12.7)  | 21.2<br>(19.7-22.8) | 12.1<br>(9.9-14.5)  | 28.1<br>(26.1-30.1) |
| <b>Kazakhstan</b>                       | 2.9<br>(2.3-3.6)   | 6.3<br>(5.6-7.1)    | 2.5<br>(2.0-3.1)    | 22.0<br>(19.9-24.3) | 3.3<br>(2.6-4.1)   | 7.3<br>(6.5-8.3)    | 2.9<br>(2.3-3.6)    | 24.7<br>(22.7-27.0) | 3.7<br>(3.0-4.5)   | 8.2<br>(7.3-9.2)    | 3.2<br>(2.5-3.9)    | 22.3<br>(20.5-24.2) | 7.4<br>(6.0-8.9)    | 15.4<br>(13.8-17.0) | 5.7<br>(4.6-7.0)    | 27.3<br>(24.8-29.7) |
| <b>Kyrgyzstan</b>                       | 4.0<br>(3.2-4.8)   | 8.9<br>(7.9-10.0)   | 3.2<br>(2.4-4.2)    | 15.8<br>(14.1-17.8) | 4.4<br>(3.6-5.3)   | 9.7<br>(8.6-10.9)   | 3.6<br>(2.7-4.6)    | 17.1<br>(15.3-18.9) | 4.2<br>(3.4-5.1)   | 9.5<br>(8.5-10.7)   | 3.8<br>(3.0-4.8)    | 17.8<br>(16.2-19.5) | 4.6<br>(3.7-5.6)    | 10.3<br>(9.1-11.5)  | 4.5<br>(3.5-5.6)    | 19.7<br>(17.8-22.0) |
| <b>Mongolia</b>                         | 5.1<br>(4.1-6.3)   | 8.6<br>(7.6-9.7)    | 5.2<br>(4.0-6.6)    | 14.9<br>(13.1-16.7) | 4.8<br>(3.8-6.0)   | 8.2<br>(7.3-9.3)    | 5.0<br>(3.9-6.4)    | 14.3<br>(12.6-16.1) | 4.5<br>(3.7-5.6)   | 9.0<br>(8.0-10.0)   | 4.7<br>(3.9-5.8)    | 15.1<br>(13.6-16.8) | 4.7<br>(3.7-5.8)    | 12.1<br>(10.9-13.4) | 4.5<br>(3.6-5.5)    | 18.3<br>(16.8-20.2) |
| <b>Tajikistan</b>                       | 5.2<br>(4.2-6.4)   | 11.5<br>(10.3-12.9) | 3.9<br>(3.0-4.9)    | 7.5<br>(6.5-8.5)    | 5.7<br>(4.7-7.2)   | 12.5<br>(11.1-13.9) | 4.2<br>(3.3-5.3)    | 8.1<br>(7.1-9.1)    | 5.7<br>(4.7-6.9)   | 12.4<br>(11.2-13.8) | 4.0<br>(3.1-5.1)    | 10.1<br>(8.8-11.3)  | 5.9<br>(4.8-7.1)    | 13.0<br>(11.5-14.4) | 4.3<br>(3.4-5.5)    | 13.4<br>(12.0-14.8) |
| <b>Turkmenistan</b>                     | 4.6<br>(3.7-5.6)   | 10.2<br>(9.1-11.5)  | 1.8<br>(1.4-2.3)    | 16.9<br>(15.0-18.9) | 5.1<br>(4.1-6.2)   | 11.4<br>(10.1-12.6) | 2.1<br>(1.6-2.6)    | 18.5<br>(16.7-20.5) | 5.6<br>(4.5-6.9)   | 12.1<br>(10.8-13.5) | 2.2<br>(1.8-2.8)    | 19.5<br>(17.9-21.1) | 6.5<br>(5.3-8.1)    | 14.1<br>(12.6-15.8) | 2.6<br>(2.1-3.3)    | 22.0<br>(19.9-24.1) |

| Country/Region                | Males, 1980             |                         | Females, 1980           |                         | Males, 1990             |                         | Females, 1990           |                         | Males, 2000             |                         | Females, 2000           |                         | Males, 2013            |                         | Females, 2013           |                         |
|-------------------------------|-------------------------|-------------------------|-------------------------|-------------------------|-------------------------|-------------------------|-------------------------|-------------------------|-------------------------|-------------------------|-------------------------|-------------------------|------------------------|-------------------------|-------------------------|-------------------------|
|                               | <20                     | >20                     | <20                     | >20                     | <20                     | >20                     | <20                     | >20                     | <20                     | >20                     | <20                     | >20                     | <20                    | >20                     | <20                     | >20                     |
| <b>Uzbekistan</b>             | 10.8<br>(8.5-<br>13.2)  | 9.4<br>(8.4-<br>10.5)   | 8.5<br>(6.6-<br>10.9)   | 12.1<br>(10.8-<br>13.7) | 11.9<br>(9.5-<br>14.4)  | 10.4<br>(9.2-<br>11.6)  | 9.4<br>(7.3-<br>11.9)   | 13.2<br>(11.7-<br>14.7) | 7.9<br>(6.5-<br>9.7)    | 9.9<br>(8.9-<br>10.9)   | 7.2<br>(5.7-<br>8.9)    | 13.7<br>(12.4-<br>15.3) | 7.0<br>(5.5-<br>8.5)   | 11.3<br>(10.0-<br>12.6) | 6.6<br>(5.1-<br>8.4)    | 15.8<br>(14.1-<br>17.7) |
| <b>Central Europe</b>         | 6.5<br>(5.9-<br>7.0)    | 16.4<br>(15.7-<br>17.2) | 5.3<br>(4.8-<br>5.8)    | 19.4<br>(18.5-<br>20.3) | 6.8<br>(6.3-<br>7.4)    | 16.2<br>(15.5-<br>16.9) | 5.8<br>(5.3-<br>6.4)    | 19.2<br>(18.3-<br>20.0) | 7.1<br>(6.6-<br>7.6)    | 16.7<br>(16.0-<br>17.4) | 6.1<br>(5.6-<br>6.7)    | 19.5<br>(18.7-<br>20.3) | 7.5<br>(6.9-<br>8.1)   | 18.0<br>(17.2-<br>18.8) | 6.3<br>(5.8-<br>6.9)    | 20.7<br>(19.8-<br>21.7) |
| <b>Albania</b>                | 15.2<br>(12.4-<br>18.2) | 6.8<br>(6.0-<br>7.8)    | 14.2<br>(11.3-<br>17.5) | 8.4<br>(7.3-<br>9.5)    | 15.8<br>(12.8-<br>18.9) | 6.8<br>(6.0-<br>7.7)    | 14.6<br>(11.7-<br>18.1) | 8.4<br>(7.4-<br>9.5)    | 15.1<br>(12.9-<br>17.6) | 7.5<br>(6.7-<br>8.3)    | 14.4<br>(11.9-<br>17.1) | 9.1<br>(8.2-<br>10.1)   | 11.5<br>(9.2-<br>13.9) | 9.2<br>(8.2-<br>10.2)   | 12.8<br>(10.3-<br>15.8) | 11.1<br>(9.9-<br>12.4)  |
| <b>Bosnia and Herzegovina</b> | 6.7<br>(5.4-<br>8.2)    | 11.1<br>(9.9-<br>12.5)  | 8.2<br>(6.4-<br>10.1)   | 15.7<br>(14.0-<br>17.5) | 7.2<br>(5.8-<br>8.9)    | 11.9<br>(10.5-<br>13.4) | 8.8<br>(7.0-<br>10.8)   | 16.7<br>(14.9-<br>18.6) | 8.8<br>(7.3-<br>10.5)   | 13.6<br>(12.4-<br>14.9) | 10.5<br>(8.6-<br>12.7)  | 19.3<br>(17.7-<br>21.0) | 10.1<br>(8.3-<br>12.1) | 15.4<br>(13.8-<br>17.0) | 11.6<br>(9.6-<br>14.1)  | 20.4<br>(18.4-<br>22.4) |
| <b>Bulgaria</b>               | 9.3<br>(7.5-<br>11.2)   | 22.4<br>(20.3-<br>24.8) | 8.5<br>(6.8-<br>10.6)   | 26.5<br>(24.0-<br>29.2) | 8.2<br>(6.7-<br>10.1)   | 19.7<br>(17.9-<br>21.9) | 7.6<br>(5.9-<br>9.5)    | 23.7<br>(21.6-<br>26.1) | 6.8<br>(5.5-<br>8.2)    | 16.5<br>(14.9-<br>18.3) | 6.6<br>(5.3-<br>8.2)    | 20.3<br>(18.2-<br>22.6) | 6.9<br>(5.6-<br>8.5)   | 16.6<br>(14.9-<br>18.5) | 6.7<br>(5.3-<br>8.3)    | 20.3<br>(18.3-<br>22.5) |
| <b>Croatia</b>                | 4.2<br>(3.4-<br>5.2)    | 13.9<br>(12.4-<br>15.6) | 2.9<br>(2.3-<br>3.7)    | 14.3<br>(12.7-<br>16.0) | 4.6<br>(3.7-<br>5.7)    | 14.8<br>(13.1-<br>16.6) | 3.2<br>(2.5-<br>4.0)    | 15.1<br>(13.6-<br>16.9) | 5.7<br>(4.6-<br>7.0)    | 16.8<br>(15.3-<br>18.8) | 4.1<br>(3.1-<br>5.1)    | 17.1<br>(15.5-<br>19.0) | 7.6<br>(6.1-<br>9.3)   | 19.9<br>(17.9-<br>22.2) | 5.6<br>(4.4-<br>7.1)    | 19.6<br>(17.5-<br>21.7) |
| <b>Czech Republic</b>         | 6.5<br>(5.2-<br>8.0)    | 15.7<br>(14.0-<br>17.5) | 4.6<br>(3.6-<br>5.8)    | 19.1<br>(17.1-<br>21.2) | 6.8<br>(5.5-<br>8.4)    | 16.2<br>(14.5-<br>17.8) | 4.9<br>(3.8-<br>6.1)    | 19.6<br>(17.6-<br>21.7) | 6.7<br>(5.5-<br>8.2)    | 17.3<br>(15.6-<br>19.1) | 5.0<br>(4.0-<br>6.3)    | 20.3<br>(18.4-<br>22.3) | 6.4<br>(5.2-<br>7.7)   | 17.8<br>(16.0-<br>19.6) | 4.8<br>(3.8-<br>6.1)    | 20.8<br>(18.8-<br>22.9) |
| <b>Hungary</b>                | 9.8<br>(7.9-<br>12.1)   | 21.4<br>(19.4-<br>23.5) | 7.6<br>(5.8-<br>9.4)    | 24.9<br>(22.4-<br>27.5) | 10.4<br>(8.6-<br>12.7)  | 22.4<br>(20.3-<br>24.6) | 8.0<br>(6.4-<br>9.8)    | 25.8<br>(23.3-<br>28.3) | 8.5<br>(6.9-<br>10.5)   | 20.7<br>(18.6-<br>22.7) | 6.5<br>(5.2-<br>8.1)    | 24.1<br>(21.8-<br>26.7) | 7.9<br>(6.5-<br>9.6)   | 21.7<br>(19.6-<br>24.0) | 6.1<br>(4.9-<br>7.5)    | 24.7<br>(22.4-<br>27.2) |
| <b>Macedonia</b>              | 5.6<br>(4.6-<br>6.9)    | 11.6<br>(10.4-<br>13.0) | 3.8<br>(3.0-<br>5.0)    | 18.1<br>(16.2-<br>20.0) | 6.1<br>(4.9-<br>7.4)    | 12.4<br>(10.9-<br>14.0) | 4.1<br>(3.1-<br>5.3)    | 19.0<br>(17.0-<br>20.9) | 7.3<br>(6.0-<br>8.8)    | 14.7<br>(13.2-<br>16.4) | 4.8<br>(3.8-<br>6.0)    | 20.6<br>(18.8-<br>22.8) | 8.6<br>(7.2-<br>10.4)  | 16.8<br>(15.1-<br>18.6) | 5.4<br>(4.4-<br>6.7)    | 21.6<br>(19.6-<br>23.6) |
| <b>Montenegro</b>             | 6.8<br>(5.6-<br>8.2)    | 15.1<br>(13.5-<br>16.9) | 6.2<br>(4.9-<br>7.6)    | 19.5<br>(17.6-<br>21.5) | 7.5<br>(6.1-<br>9.2)    | 16.2<br>(14.5-<br>18.0) | 6.7<br>(5.3-<br>8.2)    | 20.7<br>(18.5-<br>23.2) | 8.3<br>(6.8-<br>10.0)   | 17.6<br>(15.9-<br>19.5) | 7.4<br>(5.9-<br>9.0)    | 22.1<br>(19.7-<br>24.4) | 9.4<br>(7.6-<br>11.3)  | 19.5<br>(17.5-<br>21.5) | 8.3<br>(6.8-<br>10.2)   | 24.1<br>(21.7-<br>26.6) |
| <b>Poland</b>                 | 5.3<br>(4.3-<br>6.5)    | 17.2<br>(15.4-<br>19.1) | 4.7<br>(3.7-<br>5.9)    | 20.5<br>(18.5-<br>22.7) | 6.1<br>(5.0-<br>7.4)    | 16.7<br>(14.9-<br>18.5) | 5.9<br>(4.7-<br>7.4)    | 20.0<br>(18.0-<br>22.1) | 6.4<br>(5.4-<br>7.6)    | 17.2<br>(15.5-<br>19.0) | 6.2<br>(5.1-<br>7.5)    | 20.2<br>(18.1-<br>22.3) | 6.9<br>(5.6-<br>8.4)   | 18.3<br>(16.5-<br>20.3) | 6.0<br>(4.7-<br>7.4)    | 20.9<br>(18.9-<br>23.2) |
| <b>Romania</b>                | 6.6<br>(5.3-<br>8.2)    | 15.2<br>(13.6-<br>16.9) | 4.4<br>(3.5-<br>5.5)    | 16.6<br>(14.7-<br>18.6) | 6.4<br>(5.2-<br>7.9)    | 14.7<br>(13.0-<br>16.3) | 4.2<br>(3.3-<br>5.4)    | 16.0<br>(14.1-<br>17.8) | 7.2<br>(5.9-<br>8.8)    | 16.1<br>(14.5-<br>17.9) | 4.7<br>(3.7-<br>6.0)    | 17.4<br>(15.5-<br>19.4) | 8.6<br>(7.0-<br>10.4)  | 18.7<br>(16.9-<br>20.6) | 5.7<br>(4.5-<br>6.9)    | 19.8<br>(17.8-<br>22.1) |
| <b>Serbia</b>                 | 3.3<br>(2.6-<br>4.1)    | 12.3<br>(11.0-<br>13.7) | 2.7<br>(2.2-<br>3.4)    | 15.5<br>(13.8-<br>17.3) | 3.6<br>(2.9-<br>4.4)    | 13.3<br>(12.0-<br>14.8) | 3.0<br>(2.4-<br>3.7)    | 16.5<br>(14.9-<br>18.6) | 5.1<br>(4.2-<br>6.1)    | 14.6<br>(13.3-<br>16.0) | 4.6<br>(3.7-<br>5.6)    | 17.9<br>(16.5-<br>19.5) | 6.7<br>(5.5-<br>8.1)   | 16.0<br>(14.5-<br>17.4) | 6.9<br>(5.6-<br>8.4)    | 19.5<br>(17.7-<br>21.3) |
| <b>Slovakia</b>               | 4.0<br>(3.3-<br>4.9)    | 15.6<br>(14.0-<br>17.2) | 3.8<br>(3.1-<br>4.8)    | 18.9<br>(17.0-<br>20.8) | 4.7<br>(3.8-<br>5.7)    | 17.3<br>(15.5-<br>19.2) | 4.4<br>(3.4-<br>5.5)    | 20.7<br>(18.8-<br>22.9) | 5.0<br>(4.0-<br>6.2)    | 17.4<br>(15.9-<br>19.3) | 4.8<br>(3.8-<br>6.1)    | 21.0<br>(19.0-<br>23.1) | 5.5<br>(4.5-<br>6.7)   | 17.6<br>(15.7-<br>19.5) | 5.5<br>(4.3-<br>6.9)    | 21.5<br>(19.3-<br>23.7) |

| Country/Region                    | Males, 1980       |                     | Females, 1980     |                     | Males, 1990       |                     | Females, 1990      |                     | Males, 2000       |                     | Females, 2000      |                     | Males, 2013        |                     | Females, 2013       |                     |
|-----------------------------------|-------------------|---------------------|-------------------|---------------------|-------------------|---------------------|--------------------|---------------------|-------------------|---------------------|--------------------|---------------------|--------------------|---------------------|---------------------|---------------------|
|                                   | <20               | >20                 | <20               | >20                 | <20               | >20                 | <20                | >20                 | <20               | >20                 | <20                | >20                 | <20                | >20                 | <20                 | >20                 |
| <b>Slovenia</b>                   | 5.7<br>(4.5-7.0)  | 14.7<br>(13.2-16.4) | 2.8<br>(2.2-3.5)  | 15.5<br>(13.7-17.3) | 6.1<br>(4.9-7.4)  | 15.6<br>(14.0-17.3) | 2.8<br>(2.4-3.4)   | 16.4<br>(14.6-18.2) | 6.5<br>(5.3-7.9)  | 17.6<br>(16.0-19.4) | 4.1<br>(3.6-4.8)   | 19.4<br>(17.5-21.5) | 7.2<br>(5.9-8.6)   | 19.9<br>(17.9-22.0) | 5.3<br>(4.3-6.4)    | 22.4<br>(20.2-24.9) |
| <b>Central Latin America</b>      | 6.5<br>(5.6-7.5)  | 10.8<br>(10.0-11.7) | 5.1<br>(4.4-6.1)  | 17.6<br>(16.5-18.8) | 6.6<br>(5.7-7.6)  | 11.5<br>(10.6-12.3) | 5.1<br>(4.4-5.8)   | 18.4<br>(17.4-19.4) | 6.3<br>(5.6-7.1)  | 13.5<br>(12.7-14.3) | 5.8<br>(5.3-6.4)   | 23.7<br>(22.8-24.6) | 7.4<br>(6.5-8.4)   | 16.7<br>(15.7-17.6) | 7.5<br>(6.6-8.3)    | 28.4<br>(27.3-29.8) |
| <b>Colombia</b>                   | 2.0<br>(1.6-2.5)  | 6.4<br>(5.7-7.2)    | 2.3<br>(1.8-2.8)  | 13.7<br>(12.1-15.4) | 2.2<br>(1.8-2.7)  | 6.9<br>(6.1-7.7)    | 2.5<br>(2.0-3.1)   | 14.5<br>(12.9-16.1) | 3.2<br>(2.6-3.8)  | 9.3<br>(8.4-10.3)   | 3.0<br>(2.4-3.7)   | 17.2<br>(15.9-18.6) | 4.1<br>(3.4-4.8)   | 14.6<br>(13.5-15.8) | 3.6<br>(2.9-4.3)    | 22.6<br>(21.0-24.3) |
| <b>Costa Rica</b>                 | 5.0<br>(4.0-6.0)  | 11.8<br>(10.5-13.3) | 9.3<br>(7.3-11.4) | 23.0<br>(20.7-25.5) | 5.7<br>(4.7-7.0)  | 13.5<br>(12.1-15.1) | 10.6<br>(8.4-12.9) | 25.6<br>(23.1-28.2) | 6.2<br>(5.1-7.4)  | 14.3<br>(12.9-16.0) | 11.5<br>(9.1-14.0) | 27.2<br>(24.9-29.8) | 6.7<br>(5.3-8.2)   | 15.4<br>(13.7-17.1) | 12.4<br>(10.0-15.1) | 28.8<br>(26.1-31.7) |
| <b>El Salvador</b>                | 1.7<br>(1.4-2.2)  | 4.0<br>(3.5-4.6)    | 3.7<br>(2.9-4.7)  | 21.3<br>(19.1-23.5) | 1.9<br>(1.5-2.3)  | 4.5<br>(3.9-5.0)    | 4.2<br>(3.2-5.3)   | 22.9<br>(20.6-25.2) | 2.3<br>(1.9-2.8)  | 5.4<br>(4.8-6.1)    | 5.4<br>(4.4-6.7)   | 26.8<br>(24.7-29.0) | 2.7<br>(2.2-3.3)   | 6.2<br>(5.5-7.0)    | 6.3<br>(5.1-7.6)    | 33.0<br>(30.3-35.5) |
| <b>Guatemala</b>                  | 3.5<br>(2.8-4.3)  | 6.3<br>(5.6-7.3)    | 3.6<br>(2.8-4.5)  | 13.5<br>(11.9-15.1) | 3.7<br>(3.0-4.6)  | 6.7<br>(5.9-7.5)    | 3.8<br>(3.1-4.7)   | 13.7<br>(12.2-15.3) | 3.6<br>(3.1-4.2)  | 6.6<br>(6.1-7.3)    | 3.8<br>(3.3-4.4)   | 16.0<br>(14.9-17.0) | 3.4<br>(2.7-4.2)   | 9.4<br>(8.4-10.4)   | 3.8<br>(3.0-4.7)    | 19.1<br>(17.1-21.1) |
| <b>Honduras</b>                   | 1.1<br>(0.9-1.4)  | 2.6<br>(2.3-3.0)    | 3.1<br>(2.4-4.0)  | 15.4<br>(13.7-17.2) | 1.3<br>(1.0-1.6)  | 3.0<br>(2.6-3.3)    | 3.5<br>(2.7-4.3)   | 16.8<br>(15.0-18.8) | 1.6<br>(1.3-2.0)  | 3.9<br>(3.4-4.4)    | 4.0<br>(3.2-5.0)   | 20.5<br>(18.9-22.2) | 2.4<br>(2.0-3.0)   | 5.6<br>(4.9-6.3)    | 4.7<br>(3.8-5.7)    | 30.0<br>(27.9-32.0) |
| <b>Mexico</b>                     | 9.5<br>(7.8-11.5) | 14.0<br>(12.5-15.7) | 6.2<br>(4.8-7.9)  | 18.9<br>(16.9-21.0) | 9.8<br>(8.0-11.9) | 15.1<br>(13.4-16.8) | 6.2<br>(4.9-7.6)   | 20.1<br>(18.3-22.1) | 9.1<br>(7.6-10.6) | 17.9<br>(16.4-19.4) | 7.1<br>(6.1-8.3)   | 28.2<br>(26.7-29.9) | 10.5<br>(8.8-12.4) | 20.6<br>(18.9-22.5) | 9.8<br>(8.1-11.4)   | 32.7<br>(30.6-35.0) |
| <b>Nicaragua</b>                  | 4.1<br>(3.3-5.0)  | 9.2<br>(8.1-10.3)   | 3.9<br>(3.0-4.8)  | 21.2<br>(18.9-23.4) | 4.1<br>(3.3-5.1)  | 9.1<br>(8.1-10.3)   | 4.0<br>(3.2-4.9)   | 21.3<br>(19.3-23.4) | 4.3<br>(3.5-5.3)  | 9.4<br>(8.4-10.6)   | 4.6<br>(3.7-5.5)   | 25.8<br>(24.2-27.5) | 4.5<br>(3.7-5.5)   | 10.3<br>(9.2-11.6)  | 5.2<br>(4.1-6.5)    | 30.8<br>(28.3-33.4) |
| <b>Panama</b>                     | 3.8<br>(3.0-4.6)  | 6.3<br>(7.5-9.4)    | 4.8<br>(3.7-6.0)  | 12.1<br>(13.7-17.2) | 3.9<br>(3.2-4.8)  | 8.3<br>(7.7-9.8)    | 5.0<br>(3.9-6.2)   | 15.1<br>(14.2-17.9) | 4.1<br>(3.3-5.0)  | 9.1<br>(8.0-10.2)   | 5.2<br>(4.1-6.6)   | 16.6<br>(14.8-18.5) | 4.9<br>(3.9-6.0)   | 10.9<br>(9.7-12.2)  | 6.2<br>(5.0-7.6)    | 19.4<br>(17.4-21.4) |
| <b>Venezuela</b>                  | 4.7<br>(3.8-5.8)  | 10.4<br>(9.2-11.7)  | 6.0<br>(4.7-7.3)  | 18.7<br>(16.7-20.8) | 4.4<br>(3.5-5.4)  | 9.9<br>(8.8-11.1)   | 5.7<br>(4.5-7.1)   | 17.8<br>(16.0-19.7) | 4.5<br>(3.6-5.5)  | 10.1<br>(9.0-11.3)  | 5.8<br>(4.6-7.2)   | 18.1<br>(16.1-20.2) | 6.1<br>(4.9-7.4)   | 13.4<br>(12.0-14.9) | 7.7<br>(6.2-9.5)    | 23.0<br>(20.8-25.4) |
| <b>Central Sub-Saharan Africa</b> | 5.6<br>(4.8-6.6)  | 6.3<br>(5.9-6.7)    | 5.4<br>(4.5-6.5)  | 6.7<br>(6.2-7.2)    | 5.6<br>(4.7-6.5)  | 6.1<br>(5.7-6.5)    | 5.3<br>(4.4-6.4)   | 6.6<br>(6.1-7.1)    | 5.6<br>(4.8-6.5)  | 6.4<br>(6.0-6.8)    | 5.3<br>(4.6-6.2)   | 7.2<br>(6.8-7.7)    | 5.1<br>(4.4-5.9)   | 7.0<br>(6.6-7.5)    | 4.7<br>(3.9-5.5)    | 8.5<br>(8.0-9.1)    |
| <b>Angola</b>                     | 4.9<br>(4.0-6.0)  | 9.8<br>(8.7-11.0)   | 5.0<br>(3.9-6.3)  | 15.2<br>(13.5-17.0) | 4.4<br>(3.5-5.4)  | 8.9<br>(7.9-10.0)   | 4.5<br>(3.6-5.7)   | 14.0<br>(12.5-15.7) | 4.7<br>(3.9-5.7)  | 9.8<br>(8.7-11.0)   | 5.0<br>(4.1-6.1)   | 15.5<br>(13.9-17.1) | 5.7<br>(4.6-7.0)   | 12.0<br>(10.7-13.4) | 6.0<br>(4.7-7.5)    | 18.7<br>(16.7-20.9) |
| <b>Central African Republic</b>   | 6.2<br>(4.9-7.6)  | 12.4<br>(11.1-13.8) | 4.3<br>(3.3-5.5)  | 3.2<br>(2.8-3.6)    | 5.3<br>(4.3-6.4)  | 10.7<br>(9.5-12.0)  | 3.8<br>(3.0-4.7)   | 2.7<br>(2.4-3.1)    | 5.9<br>(5.0-7.0)  | 11.8<br>(10.4-13.2) | 4.2<br>(3.4-5.2)   | 2.9<br>(2.5-3.3)    | 6.2<br>(5.0-7.6)   | 13.2<br>(11.8-14.7) | 3.1<br>(2.4-4.0)    | 3.3<br>(2.9-3.8)    |

| Country/Region                          | Males, 1980        |                     | Females, 1980      |                     | Males, 1990        |                     | Females, 1990      |                     | Males, 2000         |                     | Females, 2000       |                     | Males, 2013         |                     | Females, 2013       |                     |
|-----------------------------------------|--------------------|---------------------|--------------------|---------------------|--------------------|---------------------|--------------------|---------------------|---------------------|---------------------|---------------------|---------------------|---------------------|---------------------|---------------------|---------------------|
|                                         | <20                | >20                 | <20                | >20                 | <20                | >20                 | <20                | >20                 | <20                 | >20                 | <20                 | >20                 | <20                 | >20                 | <20                 | >20                 |
| <b>Congo</b>                            | 4.7<br>(3.8-5.8)   | 9.5<br>(8.5-10.7)   | 3.3<br>(2.5-4.3)   | 12.7<br>(11.3-14.3) | 4.8<br>(3.9-5.9)   | 9.6<br>(8.6-10.7)   | 3.4<br>(2.5-4.3)   | 12.9<br>(11.3-14.4) | 4.1<br>(3.3-5.1)    | 8.5<br>(7.5-9.6)    | 3.4<br>(2.6-4.2)    | 13.7<br>(12.3-15.3) | 2.9<br>(2.4-3.6)    | 6.5<br>(5.7-7.4)    | 2.9<br>(2.3-3.7)    | 14.3<br>(13.0-15.8) |
| <b>Democratic Republic of the Congo</b> | 5.9<br>(4.7-7.3)   | 4.2<br>(3.6-4.7)    | 5.7<br>(4.4-7.3)   | 3.8<br>(3.3-4.3)    | 6.0<br>(4.8-7.5)   | 4.2<br>(3.7-4.8)    | 5.8<br>(4.5-7.4)   | 3.8<br>(3.4-4.4)    | 5.9<br>(4.8-7.1)    | 4.4<br>(3.9-5.0)    | 5.6<br>(4.6-7.0)    | 4.1<br>(3.6-4.7)    | 4.9<br>(4.0-6.0)    | 4.7<br>(4.1-5.3)    | 4.4<br>(3.4-5.5)    | 4.5<br>(4.0-5.2)    |
| <b>Equatorial Guinea</b>                | 11.3<br>(9.3-13.7) | 21.2<br>(18.9-23.4) | 11.6<br>(9.4-14.1) | 30.6<br>(27.8-33.3) | 11.5<br>(9.4-13.8) | 21.6<br>(19.6-23.8) | 12.0<br>(9.7-14.7) | 31.1<br>(28.2-34.0) | 12.2<br>(10.2-14.4) | 22.8<br>(20.6-25.2) | 12.7<br>(10.7-15.3) | 32.9<br>(30.0-35.9) | 12.9<br>(10.6-15.6) | 24.8<br>(22.4-27.1) | 13.5<br>(10.9-16.6) | 35.4<br>(32.3-38.3) |
| <b>Gabon</b>                            | 2.4<br>(1.9-3.0)   | 9.7<br>(8.6-10.9)   | 2.6<br>(2.0-3.2)   | 15.0<br>(13.4-16.9) | 2.5<br>(2.0-3.1)   | 10.3<br>(9.1-11.5)  | 2.7<br>(2.1-3.4)   | 15.9<br>(14.2-17.7) | 2.6<br>(2.1-3.1)    | 10.9<br>(9.7-12.2)  | 3.1<br>(2.5-3.9)    | 19.9<br>(18.1-21.8) | 3.3<br>(2.6-4.0)    | 11.6<br>(10.4-13.0) | 3.9<br>(3.1-4.8)    | 27.9<br>(25.7-30.1) |
| <b>East Asia</b>                        | 4.1<br>(3.2-5.0)   | 1.5<br>(1.4-1.7)    | 3.0<br>(2.3-3.9)   | 2.0<br>(1.7-2.2)    | 5.1<br>(4.2-6.0)   | 1.9<br>(1.7-2.1)    | 3.9<br>(3.2-4.7)   | 2.4<br>(2.2-2.6)    | 5.7<br>(4.7-6.7)    | 2.5<br>(2.3-2.7)    | 3.1<br>(2.5-3.7)    | 3.5<br>(3.3-3.8)    | 6.8<br>(5.6-8.1)    | 3.8<br>(3.5-4.2)    | 2.8<br>(2.2-3.4)    | 4.9<br>(4.5-5.4)    |
| <b>China</b>                            | 4.1<br>(3.2-5.1)   | 1.5<br>(1.3-1.7)    | 3.0<br>(2.3-4.0)   | 1.9<br>(1.7-2.2)    | 5.1<br>(4.2-6.1)   | 1.8<br>(1.6-2.0)    | 3.9<br>(3.2-4.8)   | 2.3<br>(2.1-2.6)    | 5.7<br>(4.8-6.8)    | 2.4<br>(2.2-2.7)    | 3.1<br>(2.5-3.8)    | 3.5<br>(3.2-3.8)    | 6.9<br>(5.7-8.2)    | 3.8<br>(3.5-4.3)    | 2.8<br>(2.2-3.4)    | 5.0<br>(4.5-5.5)    |
| <b>North Korea</b>                      | 1.0<br>(0.9-1.3)   | 2.1<br>(1.8-2.4)    | 0.9<br>(0.7-1.1)   | 2.7<br>(2.4-3.1)    | 1.1<br>(0.9-1.4)   | 2.2<br>(1.9-2.5)    | 1.0<br>(0.8-1.2)   | 2.9<br>(2.5-3.2)    | 1.0<br>(0.8-1.3)    | 2.1<br>(1.8-2.4)    | 0.9<br>(0.7-1.1)    | 2.8<br>(2.4-3.2)    | 1.0<br>(0.8-1.3)    | 2.1<br>(2.4-2.4)    | 0.9<br>(0.7-1.1)    | 2.8<br>(2.5-3.2)    |
| <b>Taiwan (Province of China)</b>       | 5.4<br>(4.4-6.8)   | 3.1<br>(2.7-3.5)    | 3.0<br>(2.3-3.7)   | 4.0<br>(3.5-4.6)    | 6.3<br>(5.3-7.3)   | 3.5<br>(3.1-3.9)    | 3.3<br>(2.8-4.0)   | 4.6<br>(4.0-5.1)    | 6.9<br>(6.1-7.9)    | 3.8<br>(3.5-4.2)    | 3.7<br>(3.2-4.3)    | 5.2<br>(4.8-5.7)    | 7.7<br>(6.2-9.4)    | 4.3<br>(3.7-4.8)    | 4.2<br>(3.3-5.3)    | 6.4<br>(5.6-7.2)    |
| <b>Eastern Europe</b>                   | 5.9<br>(4.9-6.9)   | 9.8<br>(9.1-10.6)   | 5.4<br>(4.5-6.4)   | 21.6<br>(20.0-23.1) | 7.0<br>(6.1-8.0)   | 10.4<br>(9.7-11.0)  | 6.3<br>(5.5-7.2)   | 22.7<br>(21.6-23.8) | 6.5<br>(5.6-7.5)    | 12.7<br>(12.2-13.3) | 5.9<br>(5.0-6.9)    | 26.8<br>(25.9-27.7) | 7.1<br>(6.0-8.4)    | 14.8<br>(13.7-16.0) | 6.4<br>(5.4-7.6)    | 27.0<br>(25.3-28.7) |
| <b>Belarus</b>                          | 3.1<br>(2.5-3.8)   | 7.0<br>(6.2-7.9)    | 3.6<br>(2.8-4.5)   | 11.9<br>(10.5-13.5) | 3.4<br>(2.8-4.2)   | 7.8<br>(6.9-8.8)    | 3.9<br>(3.1-4.9)   | 13.0<br>(11.4-14.7) | 3.3<br>(2.7-4.1)    | 7.8<br>(6.9-8.7)    | 3.8<br>(3.1-4.7)    | 12.9<br>(11.5-14.4) | 3.8<br>(3.0-4.7)    | 8.8<br>(7.8-9.9)    | 4.2<br>(3.4-5.2)    | 14.2<br>(12.5-16.0) |
| <b>Estonia</b>                          | 5.1<br>(4.1-6.3)   | 13.3<br>(11.8-14.8) | 5.6<br>(4.4-6.9)   | 21.1<br>(18.9-23.3) | 5.4<br>(4.2-6.5)   | 13.9<br>(12.5-15.4) | 5.9<br>(4.6-7.3)   | 21.7<br>(19.6-24.0) | 6.4<br>(5.2-7.9)    | 16.4<br>(14.8-18.2) | 7.0<br>(5.6-8.6)    | 23.6<br>(21.3-26.0) | 7.3<br>(5.9-9.0)    | 19.0<br>(17.2-21.0) | 7.6<br>(6.1-9.4)    | 25.6<br>(23.2-28.1) |
| <b>Latvia</b>                           | 3.7<br>(2.9-4.6)   | 14.6<br>(13.0-16.1) | 3.5<br>(2.7-4.4)   | 24.6<br>(22.3-27.3) | 4.2<br>(3.4-5.1)   | 16.2<br>(14.6-17.9) | 3.9<br>(3.0-4.9)   | 26.6<br>(24.1-29.2) | 4.2<br>(3.4-5.1)    | 15.8<br>(14.3-17.6) | 3.4<br>(2.7-4.1)    | 25.2<br>(22.9-27.7) | 4.8<br>(3.9-5.8)    | 17.4<br>(15.7-19.1) | 3.4<br>(2.8-4.3)    | 25.7<br>(23.3-28.2) |
| <b>Lithuania</b>                        | 3.8<br>(3.1-4.8)   | 12.7<br>(11.3-14.2) | 3.6<br>(2.8-4.6)   | 18.7<br>(16.9-21.0) | 4.4<br>(3.4-5.3)   | 14.3<br>(12.8-15.8) | 4.1<br>(3.2-5.0)   | 20.6<br>(18.4-22.8) | 5.2<br>(4.2-6.4)    | 16.3<br>(14.8-18.0) | 4.6<br>(3.7-5.7)    | 22.7<br>(20.4-25.2) | 6.3<br>(5.1-7.8)    | 18.3<br>(16.4-20.2) | 5.2<br>(4.2-6.5)    | 24.4<br>(22.2-26.9) |
| <b>Moldova</b>                          | 4.4<br>(3.6-5.5)   | 9.8<br>(8.6-11.0)   | 4.3<br>(3.3-5.6)   | 24.3<br>(21.9-26.9) | 4.8<br>(3.8-6.0)   | 10.6<br>(9.4-11.8)  | 4.7<br>(3.6-6.1)   | 25.8<br>(23.1-28.2) | 4.9<br>(4.0-6.0)    | 11.1<br>(9.9-12.4)  | 4.8<br>(3.7-6.1)    | 26.6<br>(24.5-28.8) | 5.6<br>(4.5-6.8)    | 12.7<br>(11.3-14.1) | 5.3<br>(4.1-6.8)    | 28.8<br>(26.3-31.3) |

| Country/Region                    | Males, 1980           |                         | Females, 1980        |                         | Males, 1990           |                         | Females, 1990        |                         | Males, 2000             |                         | Females, 2000         |                         | Males, 2013            |                         | Females, 2013         |                         |
|-----------------------------------|-----------------------|-------------------------|----------------------|-------------------------|-----------------------|-------------------------|----------------------|-------------------------|-------------------------|-------------------------|-----------------------|-------------------------|------------------------|-------------------------|-----------------------|-------------------------|
|                                   | <20                   | >20                     | <20                  | >20                     | <20                   | >20                     | <20                  | >20                     | <20                     | >20                     | <20                   | >20                     | <20                    | >20                     | <20                   | >20                     |
| <b>Russia</b>                     | 6.2<br>(4.8-<br>7.8)  | 9.1<br>(8.0-<br>10.2)   | 5.6<br>(4.3-<br>7.2) | 22.3<br>(20.2-<br>24.6) | 7.5<br>(6.4-<br>8.9)  | 9.4<br>(8.7-<br>10.1)   | 6.7<br>(5.6-<br>7.9) | 23.1<br>(21.8-<br>24.5) | 6.9<br>(5.7-<br>8.4)    | 12.8<br>(12.1-<br>13.5) | 6.3<br>(5.0-<br>7.7)  | 29.2<br>(28.3-<br>30.2) | 7.3<br>(5.8-<br>9.2)   | 15.3<br>(13.8-<br>17.0) | 6.6<br>(5.2-<br>8.3)  | 28.5<br>(26.1-<br>30.9) |
| <b>Ukraine</b>                    | 5.8<br>(4.7-<br>7.1)  | 11.6<br>(10.3-<br>12.9) | 5.3<br>(4.1-<br>6.7) | 21.5<br>(19.4-<br>23.6) | 6.5<br>(5.2-<br>8.1)  | 12.8<br>(11.4-<br>14.3) | 5.9<br>(4.6-<br>7.4) | 23.2<br>(20.8-<br>25.4) | 6.4<br>(5.2-<br>7.8)    | 12.8<br>(11.5-<br>14.2) | 5.8<br>(4.5-<br>7.2)  | 23.1<br>(20.7-<br>25.4) | 7.3<br>(5.9-<br>8.9)   | 14.6<br>(13.0-<br>16.2) | 6.5<br>(5.1-<br>8.0)  | 25.2<br>(22.8-<br>27.9) |
| <b>Eastern Sub-Saharan Africa</b> | 3.5<br>(3.3-<br>3.8)  | 4.4<br>(4.2-<br>4.6)    | 2.9<br>(2.7-<br>3.1) | 6.0<br>(5.7-<br>6.2)    | 3.4<br>(3.1-<br>3.6)  | 4.2<br>(4.0-<br>4.4)    | 2.7<br>(2.5-<br>3.0) | 5.8<br>(5.6-<br>6.1)    | 3.3<br>(3.1-<br>3.5)    | 4.2<br>(4.0-<br>4.4)    | 2.8<br>(2.6-<br>3.0)  | 7.1<br>(6.8-<br>7.4)    | 3.3<br>(3.1-<br>3.5)   | 4.4<br>(4.2-<br>4.6)    | 2.9<br>(2.7-<br>3.1)  | 8.8<br>(8.4-<br>9.1)    |
| <b>Burundi</b>                    | 1.7<br>(1.3-<br>2.1)  | 3.5<br>(3.1-<br>4.0)    | 1.3<br>(1.0-<br>1.6) | 2.8<br>(2.4-<br>3.2)    | 1.6<br>(1.3-<br>2.0)  | 3.3<br>(2.9-<br>3.7)    | 1.2<br>(0.9-<br>1.5) | 2.6<br>(2.3-<br>3.0)    | 1.5<br>(1.2-<br>1.9)    | 3.3<br>(2.9-<br>3.7)    | 1.2<br>(0.9-<br>1.5)  | 2.5<br>(2.2-<br>2.8)    | 1.8<br>(1.5-<br>2.2)   | 3.7<br>(3.3-<br>4.2)    | 1.4<br>(1.1-<br>1.8)  | 2.4<br>(2.2-<br>2.8)    |
| <b>Comoros</b>                    | 7.7<br>(6.3-<br>9.5)  | 5.3<br>(4.6-<br>6.0)    | 4.6<br>(3.6-<br>5.8) | 12.6<br>(11.3-<br>14.1) | 8.7<br>(7.1-<br>10.6) | 5.6<br>(4.9-<br>6.3)    | 5.2<br>(4.1-<br>6.5) | 13.4<br>(11.9-<br>14.8) | 12.5<br>(10.8-<br>14.3) | 5.3<br>(4.7-<br>6.0)    | 8.3<br>(6.8-<br>10.1) | 16.2<br>(14.5-<br>17.9) | 10.1<br>(8.1-<br>12.4) | 5.5<br>(5.0-<br>5.9)    | 7.9<br>(6.1-<br>9.9)  | 20.8<br>(19.1-<br>22.4) |
| <b>Djibouti</b>                   | 4.5<br>(3.6-<br>5.6)  | 7.5<br>(6.6-<br>8.3)    | 5.7<br>(4.4-<br>7.2) | 11.1<br>(9.8-<br>12.5)  | 4.8<br>(3.8-<br>5.9)  | 7.8<br>(7.0-<br>8.8)    | 6.0<br>(4.7-<br>7.6) | 11.6<br>(10.2-<br>13.2) | 5.6<br>(4.5-<br>6.8)    | 9.2<br>(8.2-<br>10.4)   | 7.0<br>(5.6-<br>8.8)  | 13.5<br>(12.0-<br>15.2) | 7.1<br>(5.8-<br>8.7)   | 11.8<br>(10.4-<br>13.1) | 8.6<br>(6.9-<br>10.7) | 17.0<br>(15.1-<br>19.0) |
| <b>Eritrea</b>                    | 1.2<br>(1.0-<br>1.5)  | 2.4<br>(2.1-<br>2.7)    | 1.2<br>(0.9-<br>1.5) | 3.6<br>(3.2-<br>4.1)    | 1.3<br>(1.0-<br>1.6)  | 2.5<br>(2.1-<br>2.8)    | 1.2<br>(0.9-<br>1.5) | 3.7<br>(3.2-<br>4.3)    | 1.6<br>(1.3-<br>1.9)    | 2.5<br>(2.2-<br>2.9)    | 1.4<br>(1.1-<br>1.8)  | 4.1<br>(3.6-<br>4.7)    | 1.8<br>(1.4-<br>2.2)   | 2.7<br>(2.4-<br>3.1)    | 1.6<br>(1.2-<br>2.0)  | 4.7<br>(4.1-<br>5.4)    |
| <b>Ethiopia</b>                   | 1.4<br>(1.1-<br>1.8)  | 3.0<br>(2.6-<br>3.4)    | 1.4<br>(1.1-<br>1.8) | 1.2<br>(1.0-<br>1.4)    | 1.4<br>(1.1-<br>1.8)  | 3.0<br>(2.7-<br>3.5)    | 1.4<br>(1.1-<br>1.8) | 1.2<br>(1.1-<br>1.4)    | 1.8<br>(1.4-<br>2.2)    | 3.4<br>(3.3-<br>4.2)    | 1.7<br>(1.3-<br>2.1)  | 1.4<br>(1.2-<br>1.6)    | 1.9<br>(1.5-<br>2.4)   | 4.0<br>(3.6-<br>4.6)    | 1.9<br>(1.5-<br>2.3)  | 1.8<br>(1.6-<br>2.0)    |
| <b>Kenya</b>                      | 4.0<br>(3.3-<br>5.0)  | 8.2<br>(7.3-<br>9.2)    | 3.4<br>(2.6-<br>4.3) | 11.1<br>(10.0-<br>12.4) | 3.7<br>(3.0-<br>4.5)  | 7.5<br>(6.6-<br>8.5)    | 3.1<br>(2.4-<br>3.9) | 10.4<br>(9.2-<br>11.6)  | 3.5<br>(2.9-<br>4.2)    | 7.2<br>(6.3-<br>8.1)    | 2.9<br>(2.3-<br>3.7)  | 12.7<br>(11.5-<br>14.0) | 3.0<br>(2.4-<br>3.6)   | 6.3<br>(5.6-<br>7.2)    | 2.6<br>(2.0-<br>3.2)  | 15.2<br>(13.7-<br>16.8) |
| <b>Madagascar</b>                 | 4.0<br>(3.2-<br>4.9)  | 2.1<br>(1.9-<br>2.4)    | 1.6<br>(1.2-<br>2.0) | 4.2<br>(3.7-<br>4.8)    | 3.5<br>(2.8-<br>4.4)  | 1.9<br>(1.7-<br>2.2)    | 1.4<br>(1.1-<br>1.8) | 3.8<br>(3.3-<br>4.3)    | 3.2<br>(2.6-<br>3.9)    | 1.7<br>(1.5-<br>2.0)    | 1.8<br>(1.4-<br>2.3)  | 3.7<br>(3.3-<br>4.2)    | 3.4<br>(2.7-<br>4.3)   | 1.9<br>(1.6-<br>2.1)    | 2.1<br>(1.6-<br>2.7)  | 4.0<br>(3.5-<br>4.6)    |
| <b>Malawi</b>                     | 8.3<br>(6.8-<br>10.1) | 1.9<br>(1.6-<br>2.1)    | 4.7<br>(3.6-<br>6.2) | 5.2<br>(4.5-<br>5.9)    | 7.4<br>(6.1-<br>9.0)  | 1.6<br>(1.4-<br>1.9)    | 4.3<br>(3.4-<br>5.4) | 4.6<br>(4.1-<br>5.3)    | 6.4<br>(5.3-<br>7.6)    | 1.8<br>(1.6-<br>2.0)    | 5.2<br>(4.1-<br>6.4)  | 5.3<br>(4.7-<br>5.9)    | 6.3<br>(5.2-<br>7.7)   | 2.0<br>(1.8-<br>2.3)    | 6.1<br>(4.8-<br>7.9)  | 7.2<br>(6.4-<br>8.0)    |
| <b>Mauritius</b>                  | 3.9<br>(3.1-<br>4.8)  | 5.0<br>(4.4-<br>5.7)    | 5.0<br>(3.9-<br>6.2) | 13.7<br>(12.1-<br>15.4) | 4.3<br>(3.5-<br>5.4)  | 5.6<br>(4.9-<br>6.4)    | 5.5<br>(4.3-<br>6.9) | 15.0<br>(13.3-<br>16.6) | 4.7<br>(3.7-<br>5.7)    | 6.3<br>(5.6-<br>7.1)    | 5.8<br>(4.6-<br>7.3)  | 16.2<br>(14.6-<br>18.1) | 5.4<br>(4.4-<br>6.6)   | 7.4<br>(6.5-<br>8.3)    | 6.6<br>(5.3-<br>8.3)  | 18.4<br>(16.4-<br>20.5) |
| <b>Mozambique</b>                 | 4.1<br>(3.3-<br>5.1)  | 2.7<br>(2.4-<br>3.1)    | 3.9<br>(2.9-<br>5.0) | 6.6<br>(5.7-<br>7.5)    | 4.1<br>(3.3-<br>5.0)  | 2.7<br>(2.4-<br>3.1)    | 3.9<br>(2.9-<br>5.1) | 6.6<br>(5.8-<br>7.5)    | 3.6<br>(3.0-<br>4.4)    | 3.1<br>(2.7-<br>3.5)    | 3.3<br>(2.5-<br>4.1)  | 7.9<br>(7.1-<br>8.9)    | 3.5<br>(2.9-<br>4.3)   | 3.5<br>(3.0-<br>3.9)    | 3.0<br>(2.4-<br>3.7)  | 9.2<br>(8.3-<br>10.3)   |
| <b>Rwanda</b>                     | 3.9<br>(3.1-<br>4.8)  | 2.9<br>(2.5-<br>3.4)    | 2.8<br>(2.2-<br>3.6) | 2.5<br>(2.2-<br>2.9)    | 3.2<br>(2.6-<br>3.9)  | 2.4<br>(2.1-<br>2.9)    | 2.4<br>(1.8-<br>3.0) | 2.1<br>(1.9-<br>2.4)    | 3.7<br>(3.1-<br>4.5)    | 2.3<br>(1.9-<br>2.7)    | 3.2<br>(2.5-<br>4.0)  | 2.2<br>(2.0-<br>2.5)    | 4.2<br>(3.4-<br>5.1)   | 2.4<br>(2.1-<br>2.9)    | 3.4<br>(2.6-<br>4.2)  | 3.4<br>(3.0-<br>3.8)    |

| Country/Region                   | Males, 1980          |                         | Females, 1980         |                         | Males, 1990          |                         | Females, 1990         |                         | Males, 2000             |                         | Females, 2000           |                         | Males, 2013             |                         | Females, 2013           |                         |
|----------------------------------|----------------------|-------------------------|-----------------------|-------------------------|----------------------|-------------------------|-----------------------|-------------------------|-------------------------|-------------------------|-------------------------|-------------------------|-------------------------|-------------------------|-------------------------|-------------------------|
|                                  | <20                  | >20                     | <20                   | >20                     | <20                  | >20                     | <20                   | >20                     | <20                     | >20                     | <20                     | >20                     | <20                     | >20                     | <20                     | >20                     |
| <b>Seychelles</b>                | 3.5<br>(2.8-<br>4.3) | 4.0<br>(3.6-<br>4.6)    | 4.9<br>(3.8-<br>6.1)  | 18.4<br>(16.6-<br>20.4) | 3.7<br>(2.9-<br>4.5) | 4.7<br>(4.2-<br>5.1)    | 5.0<br>(3.9-<br>6.2)  | 21.0<br>(19.8-<br>22.3) | 4.1<br>(3.4-<br>4.9)    | 9.4<br>(8.5-<br>10.4)   | 5.4<br>(4.7-<br>6.3)    | 29.0<br>(27.1-<br>31.0) | 4.3<br>(3.5-<br>5.4)    | 11.0<br>(9.7-<br>12.3)  | 5.7<br>(4.6-<br>7.2)    | 30.3<br>(27.6-<br>32.8) |
| <b>Somalia</b>                   | 3.5<br>(2.8-<br>4.3) | 7.2<br>(6.3-<br>8.0)    | 3.8<br>(3.0-<br>4.8)  | 11.7<br>(10.3-<br>13.2) | 3.4<br>(2.8-<br>4.3) | 7.1<br>(6.3-<br>8.0)    | 3.8<br>(3.0-<br>4.8)  | 11.6<br>(10.2-<br>13.0) | 3.5<br>(2.9-<br>4.2)    | 7.2<br>(6.4-<br>8.0)    | 3.8<br>(3.1-<br>4.8)    | 11.9<br>(10.6-<br>13.2) | 3.5<br>(2.8-<br>4.3)    | 7.4<br>(6.6-<br>8.3)    | 3.9<br>(3.1-<br>5.0)    | 12.4<br>(11.0-<br>13.9) |
| <b>South Sudan</b>               | 7.5<br>(6.0-<br>9.0) | 14.7<br>(13.1-<br>16.4) | 9.0<br>(7.2-<br>11.0) | 24.3<br>(22.0-<br>26.7) | 7.5<br>(6.0-<br>9.1) | 14.7<br>(13.2-<br>16.5) | 9.0<br>(7.2-<br>11.2) | 24.4<br>(22.0-<br>27.2) | 7.8<br>(6.4-<br>9.3)    | 15.1<br>(13.5-<br>16.7) | 9.3<br>(7.7-<br>11.1)   | 25.3<br>(23.1-<br>27.7) | 8.2<br>(6.7-<br>10.1)   | 16.1<br>(14.3-<br>18.0) | 9.8<br>(7.8-<br>12.1)   | 26.7<br>(24.2-<br>29.6) |
| <b>Tanzania</b>                  | 3.8<br>(3.1-<br>4.7) | 5.1<br>(4.5-<br>5.8)    | 2.5<br>(1.9-<br>3.2)  | 6.4<br>(5.6-<br>7.2)    | 3.9<br>(3.2-<br>4.8) | 5.2<br>(4.6-<br>5.9)    | 2.5<br>(2.0-<br>3.2)  | 7.0<br>(6.2-<br>7.9)    | 3.1<br>(2.5-<br>3.7)    | 4.0<br>(3.6-<br>4.5)    | 2.0<br>(1.6-<br>2.5)    | 11.5<br>(10.3-<br>12.8) | 2.4<br>(1.9-<br>3.0)    | 4.0<br>(3.6-<br>4.5)    | 1.9<br>(1.5-<br>2.3)    | 16.4<br>(15.1-<br>17.8) |
| <b>Uganda</b>                    | 2.4<br>(1.9-<br>3.1) | 1.7<br>(1.5-<br>2.0)    | 2.4<br>(1.8-<br>3.0)  | 4.1<br>(3.6-<br>4.7)    | 2.6<br>(2.0-<br>3.1) | 1.8<br>(1.5-<br>2.0)    | 2.4<br>(1.9-<br>3.1)  | 4.2<br>(3.7-<br>4.8)    | 2.6<br>(2.1-<br>3.2)    | 1.7<br>(1.5-<br>2.0)    | 2.2<br>(1.7-<br>2.7)    | 5.3<br>(4.7-<br>5.9)    | 2.4<br>(1.9-<br>3.0)    | 1.7<br>(1.5-<br>2.0)    | 2.1<br>(1.6-<br>2.6)    | 6.8<br>(6.0-<br>7.6)    |
| <b>Zambia</b>                    | 7.5<br>(6.0-<br>9.1) | 6.0<br>(5.3-<br>6.8)    | 5.6<br>(4.3-<br>7.1)  | 9.4<br>(8.3-<br>10.5)   | 6.7<br>(5.4-<br>8.1) | 5.5<br>(4.8-<br>6.1)    | 5.1<br>(4.0-<br>6.4)  | 9.0<br>(8.0-<br>10.1)   | 9.3<br>(7.8-<br>10.9)   | 5.0<br>(4.5-<br>5.7)    | 6.6<br>(5.5-<br>8.2)    | 11.2<br>(10.1-<br>12.7) | 10.6<br>(8.9-<br>12.5)  | 5.1<br>(4.5-<br>5.7)    | 7.6<br>(6.0-<br>9.5)    | 13.9<br>(12.5-<br>15.5) |
| <b>High-income Asia Pacific</b>  | 2.6<br>(2.4-<br>3.0) | 2.4<br>(2.2-<br>2.6)    | 1.8<br>(1.5-<br>2.0)  | 3.1<br>(3.0-<br>3.4)    | 3.0<br>(2.7-<br>3.3) | 2.9<br>(2.7-<br>3.1)    | 2.1<br>(1.9-<br>2.4)  | 3.1<br>(3.0-<br>3.3)    | 3.7<br>(3.3-<br>4.1)    | 3.9<br>(3.6-<br>4.2)    | 2.8<br>(2.5-<br>3.1)    | 3.8<br>(3.5-<br>4.0)    | 4.0<br>(3.4-<br>4.5)    | 5.3<br>(4.9-<br>5.7)    | 2.7<br>(2.3-<br>3.1)    | 4.2<br>(3.9-<br>4.5)    |
| <b>Brunei</b>                    | 1.1<br>(0.8-<br>1.3) | 2.3<br>(2.0-<br>2.6)    | 0.7<br>(0.6-<br>0.9)  | 2.4<br>(2.1-<br>2.8)    | 1.3<br>(1.0-<br>1.6) | 2.8<br>(2.4-<br>3.2)    | 0.9<br>(0.7-<br>1.1)  | 2.9<br>(2.5-<br>3.3)    | 1.5<br>(1.1-<br>1.8)    | 3.2<br>(2.8-<br>3.6)    | 1.0<br>(0.8-<br>1.3)    | 3.2<br>(2.8-<br>3.6)    | 1.6<br>(1.3-<br>2.0)    | 3.6<br>(3.1-<br>4.0)    | 1.1<br>(0.8-<br>1.4)    | 3.5<br>(3.1-<br>4.1)    |
| <b>Japan</b>                     | 2.0<br>(1.8-<br>2.3) | 1.5<br>(1.4-<br>1.7)    | 1.4<br>(1.2-<br>1.6)  | 2.5<br>(2.4-<br>2.7)    | 2.5<br>(2.2-<br>2.8) | 1.8<br>(1.7-<br>2.0)    | 1.9<br>(1.7-<br>2.1)  | 2.4<br>(2.3-<br>2.5)    | 3.4<br>(3.0-<br>3.7)    | 3.0<br>(2.8-<br>3.3)    | 2.8<br>(2.5-<br>3.1)    | 3.1<br>(3.1-<br>3.3)    | 3.4<br>(4.0-<br>4.0)    | 4.5<br>(4.0-<br>5.0)    | 2.4<br>(2.0-<br>3.0)    | 3.3<br>(3.0-<br>3.7)    |
| <b>Singapore</b>                 | 3.5<br>(2.8-<br>4.3) | 5.3<br>(4.7-<br>6.0)    | 2.4<br>(1.9-<br>3.0)  | 6.6<br>(5.8-<br>7.5)    | 3.8<br>(3.1-<br>4.7) | 5.9<br>(5.2-<br>6.6)    | 2.6<br>(2.1-<br>3.3)  | 7.1<br>(6.3-<br>8.0)    | 5.6<br>(4.5-<br>6.9)    | 8.4<br>(7.5-<br>9.4)    | 3.1<br>(2.4-<br>4.0)    | 8.6<br>(7.7-<br>9.7)    | 7.7<br>(6.3-<br>9.4)    | 12.0<br>(10.7-<br>13.4) | 3.9<br>(3.1-<br>5.0)    | 10.8<br>(9.6-<br>12.0)  |
| <b>South Korea</b>               | 3.9<br>(3.2-<br>4.8) | 5.6<br>(4.9-<br>6.4)    | 2.5<br>(2.0-<br>3.2)  | 5.4<br>(4.7-<br>6.1)    | 4.0<br>(3.2-<br>4.9) | 5.7<br>(5.0-<br>6.5)    | 2.6<br>(2.0-<br>3.2)  | 5.4<br>(4.7-<br>6.1)    | 4.2<br>(3.4-<br>5.2)    | 6.1<br>(5.3-<br>6.9)    | 2.7<br>(2.1-<br>3.4)    | 5.5<br>(4.9-<br>6.2)    | 4.8<br>(3.9-<br>5.9)    | 6.8<br>(6.0-<br>7.7)    | 3.1<br>(2.4-<br>3.9)    | 5.8<br>(5.2-<br>6.5)    |
| <b>High-income North America</b> | 6.8<br>(5.7-<br>8.1) | 17.8<br>(16.3-<br>19.5) | 7.3<br>(6.0-<br>8.7)  | 20.5<br>(18.7-<br>22.4) | 6.9<br>(6.2-<br>7.5) | 19.4<br>(18.4-<br>20.4) | 7.6<br>(7.0-<br>8.3)  | 23.0<br>(21.9-<br>24.2) | 10.9<br>(10.2-<br>11.7) | 25.9<br>(25.0-<br>26.9) | 11.5<br>(10.7-<br>12.4) | 29.6<br>(28.5-<br>30.9) | 12.1<br>(10.7-<br>13.6) | 30.6<br>(29.1-<br>32.2) | 13.0<br>(11.5-<br>14.8) | 32.5<br>(30.7-<br>34.2) |
| <b>Canada</b>                    | 6.8<br>(5.4-<br>8.3) | 15.6<br>(13.8-<br>17.3) | 6.5<br>(5.1-<br>8.1)  | 17.2<br>(15.5-<br>19.2) | 7.4<br>(6.0-<br>9.1) | 15.7<br>(14.4-<br>17.1) | 7.0<br>(5.7-<br>8.8)  | 17.6<br>(16.1-<br>19.3) | 11.0<br>(9.5-<br>12.8)  | 20.2<br>(18.4-<br>22.0) | 9.5<br>(7.9-<br>11.3)   | 20.1<br>(18.3-<br>21.9) | 10.0<br>(8.4-<br>11.6)  | 21.9<br>(20.0-<br>23.9) | 8.8<br>(7.2-<br>10.7)   | 20.5<br>(18.7-<br>22.5) |
| <b>United States</b>             | 6.8<br>(5.5-<br>8.2) | 18.0<br>(16.3-<br>19.9) | 7.4<br>(5.9-<br>8.9)  | 20.9<br>(18.9-<br>22.9) | 6.8<br>(6.1-<br>7.5) | 19.9<br>(18.8-<br>20.9) | 7.7<br>(7.0-<br>8.5)  | 23.6<br>(22.4-<br>24.9) | 10.9<br>(10.1-<br>11.7) | 26.6<br>(25.6-<br>27.7) | 11.7<br>(10.9-<br>12.7) | 30.7<br>(29.4-<br>32.1) | 12.4<br>(10.8-<br>14.0) | 31.7<br>(30.0-<br>33.4) | 13.4<br>(11.7-<br>15.3) | 33.9<br>(31.8-<br>35.7) |

| Country/Region                      | Males, 1980         |                     | Females, 1980       |                     | Males, 1990         |                     | Females, 1990       |                     | Males, 2000         |                     | Females, 2000       |                     | Males, 2013         |                     | Females, 2013       |                     |
|-------------------------------------|---------------------|---------------------|---------------------|---------------------|---------------------|---------------------|---------------------|---------------------|---------------------|---------------------|---------------------|---------------------|---------------------|---------------------|---------------------|---------------------|
|                                     | <20                 | >20                 | <20                 | >20                 | <20                 | >20                 | <20                 | >20                 | <20                 | >20                 | <20                 | >20                 | <20                 | >20                 | <20                 | >20                 |
| <b>North Africa and Middle East</b> | 5.5<br>(5.1-6.0)    | 14.7<br>(14.1-15.3) | 7.0<br>(6.5-7.5)    | 25.3<br>(24.3-26.2) | 6.6<br>(6.1-7.1)    | 16.9<br>(16.2-17.6) | 8.3<br>(7.7-8.9)    | 28.0<br>(27.2-29.0) | 7.1<br>(6.7-7.6)    | 18.1<br>(17.5-18.7) | 9.0<br>(8.4-9.6)    | 30.8<br>(30.1-31.5) | 8.4<br>(7.9-8.9)    | 20.3<br>(19.9-20.8) | 10.2<br>(9.5-10.8)  | 33.9<br>(33.2-34.7) |
| <b>Algeria</b>                      | 4.7<br>(3.8-5.8)    | 6.8<br>(6.0-7.7)    | 10.0<br>(7.9-12.2)  | 16.7<br>(14.8-18.7) | 5.7<br>(4.7-7.0)    | 8.2<br>(7.2-9.2)    | 11.8<br>(9.5-14.3)  | 19.4<br>(17.5-21.7) | 6.4<br>(5.2-7.7)    | 8.9<br>(8.0-9.9)    | 13.0<br>(10.5-16.0) | 21.0<br>(19.2-23.0) | 7.7<br>(6.2-9.4)    | 11.1<br>(9.8-12.3)  | 15.3<br>(12.5-18.6) | 24.9<br>(22.6-27.4) |
| <b>Bahrain</b>                      | 6.1<br>(4.8-7.6)    | 17.7<br>(15.9-19.6) | 7.5<br>(5.8-9.4)    | 28.5<br>(25.9-31.3) | 7.6<br>(6.0-9.1)    | 21.2<br>(19.3-23.5) | 9.3<br>(7.3-11.7)   | 33.2<br>(30.3-36.1) | 8.7<br>(7.1-10.7)   | 25.2<br>(23.3-27.1) | 10.5<br>(8.5-12.8)  | 38.1<br>(35.9-40.2) | 9.3<br>(7.3-11.4)   | 31.0<br>(28.4-33.7) | 10.7<br>(8.5-13.4)  | 42.9<br>(40.0-45.9) |
| <b>Egypt</b>                        | 7.3<br>(5.9-8.8)    | 18.5<br>(16.6-20.5) | 7.7<br>(6.1-9.6)    | 30.9<br>(28.1-33.9) | 9.7<br>(8.1-11.6)   | 22.3<br>(20.0-24.7) | 9.8<br>(8.0-11.9)   | 34.5<br>(32.1-36.8) | 10.5<br>(8.7-12.5)  | 24.7<br>(22.4-26.9) | 12.0<br>(9.9-14.4)  | 42.5<br>(40.4-44.5) | 12.7<br>(10.7-15.2) | 26.4<br>(25.0-27.8) | 14.4<br>(11.9-17.6) | 48.4<br>(46.1-50.9) |
| <b>Iran</b>                         | 5.5<br>(4.4-6.8)    | 10.1<br>(9.0-11.4)  | 7.7<br>(6.0-9.7)    | 22.5<br>(20.1-24.9) | 6.6<br>(5.3-8.0)    | 11.9<br>(10.6-13.3) | 9.1<br>(7.3-11.2)   | 25.7<br>(23.1-28.5) | 6.1<br>(5.0-7.4)    | 12.0<br>(11.0-12.9) | 8.3<br>(6.6-10.1)   | 26.2<br>(24.3-28.2) | 5.9<br>(4.8-7.2)    | 13.6<br>(12.5-14.8) | 7.2<br>(5.7-8.9)    | 29.3<br>(27.2-31.6) |
| <b>Iraq</b>                         | 3.8<br>(3.0-4.6)    | 18.7<br>(16.8-20.8) | 4.0<br>(3.1-5.0)    | 28.8<br>(26.3-31.6) | 4.1<br>(3.3-5.1)    | 20.3<br>(18.4-22.4) | 4.3<br>(3.4-5.4)    | 30.7<br>(28.0-33.5) | 5.9<br>(4.8-7.3)    | 23.6<br>(21.4-25.9) | 6.2<br>(4.9-7.5)    | 35.0<br>(32.2-37.9) | 8.2<br>(6.8-9.8)    | 25.7<br>(23.3-28.1) | 8.2<br>(6.6-10.0)   | 37.5<br>(34.4-40.6) |
| <b>Jordan</b>                       | 5.3<br>(4.2-6.6)    | 19.3<br>(17.4-21.2) | 5.7<br>(4.4-7.1)    | 38.1<br>(35.3-41.0) | 6.2<br>(4.8-7.8)    | 21.6<br>(19.5-23.9) | 6.6<br>(5.2-8.3)    | 41.4<br>(38.7-44.0) | 6.9<br>(5.5-8.5)    | 23.6<br>(21.9-25.6) | 7.5<br>(6.1-9.2)    | 44.8<br>(42.7-46.7) | 8.0<br>(6.4-9.9)    | 27.5<br>(25.3-29.7) | 8.0<br>(6.2-10.0)   | 45.6<br>(43.4-47.9) |
| <b>Kuwait</b>                       | 10.8<br>(8.9-13.0)  | 30.3<br>(27.8-33.0) | 15.4<br>(12.6-18.7) | 46.7<br>(43.4-49.9) | 9.7<br>(7.9-11.8)   | 28.1<br>(25.6-30.9) | 14.0<br>(11.4-17.1) | 44.4<br>(41.2-47.6) | 13.8<br>(11.3-16.5) | 37.1<br>(34.5-39.8) | 19.3<br>(15.8-23.1) | 53.2<br>(50.5-55.9) | 16.7<br>(13.9-20.1) | 43.4<br>(40.9-46.1) | 23.3<br>(19.5-27.8) | 58.6<br>(55.7-61.4) |
| <b>Lebanon</b>                      | 10.2<br>(8.4-12.4)  | 15.5<br>(13.9-17.2) | 8.9<br>(7.0-10.8)   | 22.0<br>(19.9-24.2) | 12.9<br>(10.4-15.5) | 19.2<br>(17.1-21.1) | 11.1<br>(8.9-13.7)  | 26.4<br>(23.9-28.9) | 14.4<br>(12.0-17.2) | 22.1<br>(20.2-24.2) | 11.8<br>(9.6-14.5)  | 27.8<br>(25.4-30.2) | 15.9<br>(13.0-19.1) | 26.3<br>(24.2-28.4) | 12.5<br>(10.2-15.4) | 29.3<br>(27.0-31.7) |
| <b>Libya</b>                        | 13.6<br>(11.2-16.3) | 28.4<br>(25.9-31.1) | 20.9<br>(17.2-25.4) | 55.5<br>(52.3-58.8) | 13.9<br>(11.4-16.7) | 29.0<br>(26.3-31.8) | 21.4<br>(17.5-25.7) | 56.0<br>(52.8-59.4) | 14.0<br>(11.3-16.6) | 29.1<br>(26.6-31.7) | 21.4<br>(17.6-25.5) | 56.2<br>(53.1-59.6) | 14.5<br>(12.0-17.0) | 30.2<br>(27.6-32.9) | 22.1<br>(18.1-26.4) | 57.2<br>(54.0-60.4) |
| <b>Morocco</b>                      | 4.6<br>(3.7-5.7)    | 13.3<br>(11.8-14.9) | 4.8<br>(3.8-6.0)    | 15.3<br>(13.6-17.0) | 5.4<br>(4.4-6.6)    | 15.0<br>(13.4-16.5) | 5.7<br>(4.6-7.1)    | 16.6<br>(15.1-18.1) | 7.0<br>(5.8-8.4)    | 16.0<br>(14.6-17.4) | 6.3<br>(5.0-7.7)    | 18.2<br>(16.9-19.7) | 7.9<br>(6.4-9.6)    | 18.1<br>(16.3-20.0) | 9.1<br>(7.3-11.3)   | 20.9<br>(18.8-23.1) |
| <b>Oman</b>                         | 4.2<br>(3.4-5.2)    | 9.8<br>(8.5-11.1)   | 9.3<br>(7.3-11.7)   | 22.2<br>(19.9-24.7) | 4.8<br>(3.9-6.0)    | 11.0<br>(10.0-12.1) | 10.4<br>(8.3-12.6)  | 24.2<br>(22.0-26.5) | 6.7<br>(5.4-8.2)    | 15.8<br>(14.5-17.2) | 12.2<br>(9.8-14.9)  | 27.5<br>(25.6-29.9) | 8.4<br>(6.7-10.2)   | 20.6<br>(18.5-22.7) | 15.4<br>(12.4-18.5) | 36.9<br>(33.9-40.1) |
| <b>Palestine</b>                    | 7.3<br>(5.9-8.9)    | 18.8<br>(16.9-20.9) | 7.7<br>(6.2-9.5)    | 29.4<br>(26.7-32.2) | 8.5<br>(6.9-10.2)   | 21.7<br>(19.5-23.9) | 9.0<br>(7.1-11.2)   | 32.9<br>(30.2-35.9) | 9.9<br>(8.1-12.0)   | 24.7<br>(22.6-27.2) | 10.4<br>(8.4-12.7)  | 36.9<br>(33.8-39.8) | 11.9<br>(9.8-14.3)  | 29.8<br>(28.0-31.5) | 12.5<br>(10.1-15.2) | 42.4<br>(40.5-44.4) |
| <b>Qatar</b>                        | 17.1<br>(14.1-20.5) | 39.0<br>(36.0-41.8) | 12.4<br>(13.3-19.7) | 52.1<br>(49.1-55.4) | 19.8<br>(16.5-23.6) | 43.3<br>(40.3-46.3) | 14.7<br>(15.4-22.6) | 55.9<br>(52.8-58.7) | 18.1<br>(15.3-21.5) | 44.4<br>(41.5-47.7) | 15.5<br>(12.7-18.6) | 56.1<br>(53.1-59.4) | 18.8<br>(15.8-21.9) | 44.0<br>(41.8-46.4) | 15.5<br>(12.6-18.6) | 54.7<br>(52.1-57.0) |



| Country/Region                        | Males, 1980         |                     | Females, 1980       |                     | Males, 1990         |                     | Females, 1990       |                     | Males, 2000         |                     | Females, 2000       |                     | Males, 2013         |                     | Females, 2013       |                     |
|---------------------------------------|---------------------|---------------------|---------------------|---------------------|---------------------|---------------------|---------------------|---------------------|---------------------|---------------------|---------------------|---------------------|---------------------|---------------------|---------------------|---------------------|
|                                       | <20                 | >20                 | <20                 | >20                 | <20                 | >20                 | <20                 | >20                 | <20                 | >20                 | <20                 | >20                 | <20                 | >20                 | <20                 | >20                 |
| <b>Saudi Arabia</b>                   | 5.0<br>(4.0-6.3)    | 17.0<br>(15.1-18.7) | 8.2<br>(6.5-9.9)    | 28.2<br>(25.6-30.9) | 5.9<br>(4.8-7.2)    | 19.5<br>(18.3-20.9) | 9.3<br>(7.4-11.2)   | 31.4<br>(29.8-33.1) | 7.9<br>(6.5-9.5)    | 26.2<br>(24.5-28.3) | 13.3<br>(10.8-16.3) | 42.1<br>(39.8-44.6) | 9.4<br>(7.8-11.2)   | 30.0<br>(28.4-31.8) | 14.8<br>(12.2-17.7) | 44.4<br>(42.4-46.5) |
| <b>Sudan</b>                          | 4.1<br>(3.2-4.9)    | 9.3<br>(8.2-10.5)   | 4.2<br>(3.3-5.2)    | 13.8<br>(12.1-15.4) | 4.6<br>(3.6-5.7)    | 10.4<br>(9.2-11.7)  | 4.7<br>(3.7-5.8)    | 15.3<br>(13.6-17.2) | 5.1<br>(4.3-6.3)    | 11.5<br>(10.2-12.8) | 5.2<br>(4.2-6.3)    | 16.7<br>(15.0-18.6) | 5.7<br>(4.6-6.9)    | 12.7<br>(11.3-14.2) | 5.8<br>(4.5-7.1)    | 18.3<br>(16.4-20.4) |
| <b>Syria</b>                          | 8.6<br>(7.0-10.5)   | 19.2<br>(17.2-21.3) | 14.5<br>(11.6-17.9) | 33.6<br>(30.7-36.6) | 9.2<br>(7.3-11.2)   | 20.0<br>(18.1-22.0) | 15.1<br>(12.1-18.2) | 34.7<br>(31.7-37.9) | 11.3<br>(9.4-13.5)  | 21.6<br>(19.4-23.8) | 14.9<br>(12.1-18.1) | 36.7<br>(33.9-39.6) | 13.9<br>(11.5-16.5) | 24.2<br>(21.8-26.6) | 15.4<br>(12.5-18.6) | 39.9<br>(36.8-43.0) |
| <b>Tunisia</b>                        | 2.7<br>(2.1-3.4)    | 10.6<br>(9.4-11.9)  | 3.4<br>(2.7-4.2)    | 9.3<br>(8.2-10.4)   | 3.2<br>(2.6-4.0)    | 12.3<br>(10.9-13.8) | 3.9<br>(3.1-5.0)    | 10.8<br>(9.6-12.1)  | 3.6<br>(2.9-4.5)    | 13.7<br>(12.1-15.3) | 4.1<br>(3.2-5.1)    | 11.7<br>(10.4-13.1) | 4.2<br>(3.4-5.2)    | 15.3<br>(13.7-16.9) | 4.2<br>(3.3-5.2)    | 12.8<br>(11.3-14.3) |
| <b>Turkey</b>                         | 5.1<br>(4.1-6.4)    | 16.7<br>(15.0-18.5) | 4.3<br>(3.4-5.5)    | 28.3<br>(25.7-30.9) | 6.1<br>(4.8-7.5)    | 19.2<br>(17.4-21.2) | 5.1<br>(4.0-6.3)    | 31.7<br>(29.3-34.3) | 6.3<br>(5.2-7.6)    | 19.0<br>(17.5-20.8) | 4.9<br>(3.9-5.9)    | 32.6<br>(30.8-34.4) | 7.1<br>(5.7-8.7)    | 20.1<br>(18.7-21.3) | 5.7<br>(4.5-7.0)    | 34.1<br>(32.4-35.8) |
| <b>United Arab Emirates</b>           | 9.2<br>(7.4-11.2)   | 24.9<br>(22.5-27.5) | 8.7<br>(6.8-11.0)   | 30.6<br>(27.7-33.7) | 9.5<br>(7.7-11.4)   | 25.9<br>(23.5-28.7) | 8.9<br>(7.1-11.0)   | 31.6<br>(28.6-34.6) | 10.2<br>(8.8-11.6)  | 25.7<br>(23.3-28.3) | 9.8<br>(8.5-11.2)   | 31.4<br>(28.8-34.1) | 12.2<br>(9.8-14.7)  | 27.1<br>(24.5-30.0) | 12.6<br>(10.0-15.7) | 33.2<br>(30.2-36.3) |
| <b>Yemen</b>                          | 1.5<br>(1.2-1.9)    | 3.7<br>(3.2-4.2)    | 7.5<br>(5.8-9.5)    | 22.4<br>(20.2-24.8) | 1.6<br>(1.3-2.0)    | 3.8<br>(3.3-4.3)    | 7.7<br>(6.2-9.5)    | 23.0<br>(20.7-25.4) | 1.6<br>(1.3-2.0)    | 3.9<br>(3.4-4.4)    | 7.8<br>(6.3-9.6)    | 23.3<br>(21.0-25.8) | 1.7<br>(1.4-2.1)    | 4.1<br>(3.7-4.7)    | 8.3<br>(6.5-10.3)   | 24.7<br>(22.2-27.2) |
| <b>Oceania</b>                        | 3.9<br>(3.5-4.4)    | 10.4<br>(9.8-11.0)  | 6.1<br>(5.5-6.8)    | 19.0<br>(18.0-20.1) | 3.9<br>(3.5-4.3)    | 10.5<br>(9.9-11.1)  | 6.1<br>(5.5-6.8)    | 19.3<br>(18.3-20.5) | 4.0<br>(3.6-4.5)    | 10.9<br>(10.3-11.5) | 6.2<br>(5.5-6.9)    | 19.5<br>(18.6-20.5) | 4.3<br>(3.8-4.8)    | 11.4<br>(10.8-12.1) | 6.4<br>(5.7-7.2)    | 20.0<br>(19.1-21.2) |
| <b>Federated States of Micronesia</b> | 12.8<br>(10.4-15.6) | 26.1<br>(23.7-28.5) | 26.8<br>(22.4-31.2) | 49.2<br>(45.9-52.6) | 13.2<br>(10.9-16.0) | 27.0<br>(24.5-29.5) | 27.7<br>(23.2-33.1) | 50.4<br>(47.1-53.6) | 13.1<br>(10.6-16.1) | 27.9<br>(26.0-30.0) | 28.4<br>(24.0-33.2) | 52.3<br>(49.7-54.7) | 14.5<br>(11.9-17.5) | 31.3<br>(28.9-33.9) | 32.4<br>(27.6-37.7) | 57.9<br>(54.9-61.3) |
| <b>Fiji</b>                           | 1.9<br>(1.5-2.4)    | 10.8<br>(9.6-12.1)  | 5.6<br>(4.4-7.0)    | 27.7<br>(25.0-30.4) | 2.2<br>(1.7-2.7)    | 11.9<br>(10.6-13.2) | 6.2<br>(4.9-7.7)    | 30.1<br>(27.4-33.1) | 2.7<br>(2.2-3.4)    | 13.1<br>(12.0-14.2) | 6.5<br>(5.2-7.9)    | 32.8<br>(30.9-34.7) | 3.3<br>(2.7-4.1)    | 14.8<br>(13.3-16.5) | 6.9<br>(5.6-8.7)    | 35.4<br>(32.6-38.8) |
| <b>Kiribati</b>                       | 21.1<br>(17.5-25.0) | 35.9<br>(33.0-38.5) | 33.7<br>(28.7-39.1) | 51.6<br>(48.4-55.2) | 19.9<br>(16.8-23.7) | 34.3<br>(31.4-37.2) | 32.3<br>(27.3-37.3) | 50.6<br>(47.1-53.9) | 20.9<br>(17.3-24.3) | 36.6<br>(34.0-39.1) | 33.4<br>(28.2-39.3) | 53.2<br>(50.3-56.0) | 22.9<br>(19.1-26.9) | 39.3<br>(36.3-42.3) | 36.0<br>(30.7-41.4) | 55.5<br>(52.4-58.6) |
| <b>Marshall Islands</b>               | 4.7<br>(3.8-5.7)    | 21.6<br>(19.6-24.0) | 6.9<br>(5.5-8.6)    | 34.9<br>(31.7-37.9) | 5.2<br>(4.3-6.4)    | 23.8<br>(21.4-26.3) | 7.7<br>(6.1-9.5)    | 37.9<br>(34.8-40.9) | 7.0<br>(5.7-8.5)    | 30.6<br>(28.8-32.4) | 10.5<br>(8.6-12.7)  | 47.4<br>(45.3-49.4) | 7.6<br>(6.0-9.4)    | 31.9<br>(29.4-34.4) | 11.4<br>(9.1-13.9)  | 49.1<br>(45.9-52.0) |
| <b>Papua New Guinea</b>               | 2.6<br>(2.1-3.2)    | 6.2<br>(5.4-7.0)    | 3.5<br>(2.8-4.4)    | 11.1<br>(9.9-12.6)  | 2.6<br>(2.1-3.2)    | 6.3<br>(5.5-7.1)    | 3.6<br>(2.9-4.4)    | 11.4<br>(10.1-13.0) | 2.7<br>(2.2-3.3)    | 6.5<br>(5.7-7.3)    | 3.7<br>(2.9-4.6)    | 11.6<br>(10.3-13.0) | 2.9<br>(2.3-3.6)    | 7.0<br>(6.3-7.9)    | 3.9<br>(3.1-4.9)    | 12.4<br>(11.1-13.8) |
| <b>Samoa</b>                          | 18.1<br>(14.7-21.5) | 37.0<br>(34.2-39.9) | 23.4<br>(19.3-27.8) | 61.8<br>(58.7-64.8) | 19.2<br>(16.0-22.7) | 38.9<br>(36.0-42.0) | 24.8<br>(20.7-29.5) | 63.7<br>(60.6-66.8) | 20.6<br>(17.3-24.4) | 42.3<br>(40.3-44.3) | 26.3<br>(21.8-31.2) | 66.6<br>(64.6-68.6) | 23.7<br>(20.1-27.5) | 45.9<br>(42.9-49.1) | 29.6<br>(24.9-34.5) | 69.1<br>(66.2-72.0) |

| Country/Region         | Males, 1980      |                     | Females, 1980       |                     | Males, 1990       |                     | Females, 1990       |                     | Males, 2000       |                     | Females, 2000       |                     | Males, 2013       |                     | Females, 2013       |                     |
|------------------------|------------------|---------------------|---------------------|---------------------|-------------------|---------------------|---------------------|---------------------|-------------------|---------------------|---------------------|---------------------|-------------------|---------------------|---------------------|---------------------|
|                        | <20              | >20                 | <20                 | >20                 | <20               | >20                 | <20                 | >20                 | <20               | >20                 | <20                 | >20                 | <20               | >20                 | <20                 | >20                 |
| <b>Solomon Islands</b> | 8.2<br>(6.6-9.9) | 21.1<br>(19.1-23.4) | 15.6<br>(12.7-19.1) | 33.4<br>(30.3-36.6) | 8.3<br>(6.6-10.1) | 21.3<br>(19.4-23.6) | 15.9<br>(13.0-19.2) | 34.0<br>(30.8-37.0) | 8.9<br>(7.1-10.8) | 23.1<br>(21.0-25.2) | 16.8<br>(13.8-20.0) | 36.5<br>(33.6-39.2) | 9.6<br>(7.9-11.7) | 24.7<br>(22.4-27.0) | 18.0<br>(14.7-21.9) | 38.4<br>(35.2-41.6) |
| <b>Tonga</b>           | 6.5<br>(5.2-8.1) | 43.7<br>(40.6-46.6) | 10.0<br>(8.0-12.1)  | 59.5<br>(56.3-62.4) | 7.3<br>(5.9-8.9)  | 46.4<br>(43.4-49.6) | 10.9<br>(8.9-13.5)  | 62.1<br>(59.3-64.9) | 7.9<br>(6.3-9.6)  | 50.1<br>(47.4-52.8) | 12.1<br>(10.0-14.8) | 65.5<br>(63.1-67.9) | 8.3<br>(6.6-10.2) | 52.4<br>(49.7-55.2) | 14.0<br>(11.3-16.9) | 67.2<br>(64.5-69.9) |
| <b>Vanuatu</b>         | 4.5<br>(3.6-5.5) | 12.0<br>(10.5-13.6) | 6.2<br>(4.9-7.6)    | 19.6<br>(17.6-21.5) | 4.5<br>(3.7-5.5)  | 12.1<br>(10.7-13.6) | 5.9<br>(4.7-7.3)    | 19.8<br>(17.8-21.8) | 4.7<br>(3.9-5.8)  | 12.5<br>(11.1-14.1) | 5.2<br>(4.0-6.6)    | 20.6<br>(18.5-22.6) | 5.2<br>(4.3-6.4)  | 13.4<br>(12.3-14.5) | 5.6<br>(4.4-7.0)    | 22.0<br>(20.4-23.6) |
| <b>South Asia</b>      | 2.5<br>(2.1-2.9) | 3.5<br>(3.3-3.9)    | 2.5<br>(2.1-3.0)    | 3.8<br>(3.5-4.2)    | 2.7<br>(2.3-3.1)  | 3.8<br>(3.5-4.2)    | 2.8<br>(2.3-3.3)    | 4.1<br>(3.8-4.5)    | 2.5<br>(2.2-3.0)  | 4.2<br>(3.9-4.6)    | 2.6<br>(2.2-3.1)    | 4.6<br>(4.3-4.9)    | 2.5<br>(2.2-2.9)  | 4.8<br>(4.5-5.2)    | 2.6<br>(2.2-3.0)    | 5.2<br>(4.8-5.7)    |
| <b>Afghanistan</b>     | 5.6<br>(4.5-7.0) | 12.5<br>(11.2-14.0) | 3.7<br>(2.9-4.6)    | 12.0<br>(10.6-13.7) | 6.1<br>(4.9-7.6)  | 13.5<br>(12.0-15.0) | 4.0<br>(3.1-5.0)    | 13.0<br>(11.4-14.7) | 6.5<br>(5.2-7.9)  | 14.2<br>(12.7-15.9) | 4.2<br>(3.3-5.3)    | 13.6<br>(12.1-15.1) | 6.8<br>(5.4-8.3)  | 14.8<br>(13.2-16.6) | 4.4<br>(3.5-5.5)    | 13.8<br>(12.5-15.3) |
| <b>Bangladesh</b>      | 1.5<br>(1.2-1.9) | 2.0<br>(1.7-2.2)    | 1.6<br>(1.3-2.1)    | 1.8<br>(1.6-2.1)    | 1.7<br>(1.3-2.0)  | 2.2<br>(1.9-2.4)    | 1.8<br>(1.4-2.2)    | 2.0<br>(1.7-2.3)    | 1.4<br>(1.1-1.7)  | 2.8<br>(2.4-3.1)    | 1.5<br>(1.2-1.9)    | 2.6<br>(2.3-2.9)    | 1.5<br>(1.2-1.8)  | 3.4<br>(3.1-3.8)    | 1.5<br>(1.1-1.9)    | 3.8<br>(3.4-4.2)    |
| <b>Bhutan</b>          | 4.5<br>(3.6-5.7) | 9.4<br>(8.3-10.5)   | 5.0<br>(3.9-6.2)    | 14.5<br>(12.9-16.2) | 4.8<br>(3.8-5.9)  | 9.9<br>(8.8-11.2)   | 5.3<br>(4.3-6.6)    | 15.3<br>(13.6-17.1) | 5.0<br>(4.1-6.2)  | 10.8<br>(9.6-12.2)  | 5.6<br>(4.4-6.9)    | 16.3<br>(14.6-18.1) | 5.5<br>(4.5-6.8)  | 11.9<br>(10.6-13.4) | 6.1<br>(4.9-7.6)    | 17.5<br>(15.7-19.5) |
| <b>India</b>           | 2.4<br>(1.9-2.9) | 2.7<br>(2.4-3.1)    | 2.5<br>(1.9-3.1)    | 3.3<br>(2.8-3.8)    | 2.6<br>(2.1-3.2)  | 3.0<br>(2.7-3.5)    | 2.7<br>(2.2-3.5)    | 3.6<br>(3.2-4.1)    | 2.5<br>(2.0-3.0)  | 3.3<br>(2.9-3.7)    | 2.6<br>(2.0-3.2)    | 3.9<br>(3.5-4.3)    | 2.3<br>(1.8-2.8)  | 3.7<br>(3.3-4.1)    | 2.5<br>(1.9-3.1)    | 4.2<br>(3.8-4.8)    |
| <b>Nepal</b>           | 1.2<br>(1.0-1.5) | 1.4<br>(1.2-1.6)    | 1.1<br>(0.8-1.4)    | 1.6<br>(1.4-1.9)    | 1.4<br>(1.1-1.8)  | 1.7<br>(1.5-2.0)    | 1.3<br>(1.0-1.6)    | 1.9<br>(1.7-2.2)    | 1.5<br>(1.2-1.9)  | 1.9<br>(1.6-2.2)    | 1.5<br>(1.1-1.8)    | 2.1<br>(1.8-2.4)    | 1.7<br>(1.4-2.2)  | 2.2<br>(1.9-2.5)    | 1.8<br>(1.4-2.2)    | 2.7<br>(2.4-3.1)    |
| <b>Pakistan</b>        | 3.8<br>(3.1-4.6) | 11.6<br>(10.2-12.9) | 4.1<br>(3.2-5.3)    | 10.3<br>(9.2-11.7)  | 3.8<br>(3.1-4.7)  | 11.8<br>(10.5-13.3) | 4.1<br>(3.3-5.2)    | 10.6<br>(9.3-11.9)  | 3.5<br>(2.8-4.4)  | 12.9<br>(11.4-14.4) | 3.3<br>(2.6-4.2)    | 11.8<br>(10.4-13.3) | 4.1<br>(3.3-5.1)  | 14.4<br>(12.9-16.0) | 3.8<br>(3.1-4.6)    | 14.3<br>(13.0-15.7) |
| <b>Southeast Asia</b>  | 2.9<br>(2.6-3.3) | 2.5<br>(2.4-2.7)    | 2.9<br>(2.5-3.3)    | 4.0<br>(3.7-4.2)    | 3.2<br>(2.8-3.6)  | 2.7<br>(2.5-2.8)    | 3.0<br>(2.6-3.5)    | 4.2<br>(3.9-4.4)    | 3.8<br>(3.3-4.3)  | 3.4<br>(3.2-3.6)    | 3.6<br>(3.1-4.1)    | 5.5<br>(5.3-5.8)    | 4.6<br>(4.0-5.3)  | 4.8<br>(4.6-5.1)    | 4.3<br>(3.7-5.0)    | 7.6<br>(7.2-8.0)    |
| <b>Cambodia</b>        | 1.7<br>(1.3-2.1) | 1.0<br>(0.9-1.1)    | 1.7<br>(1.3-2.2)    | 1.8<br>(1.5-2.0)    | 1.8<br>(1.4-2.2)  | 1.0<br>(0.9-1.2)    | 1.8<br>(1.4-2.3)    | 1.8<br>(1.6-2.1)    | 1.7<br>(1.4-2.1)  | 1.1<br>(0.9-1.2)    | 1.7<br>(1.4-2.2)    | 2.2<br>(2.0-2.5)    | 1.7<br>(1.4-2.1)  | 1.3<br>(1.1-1.4)    | 1.7<br>(1.3-2.1)    | 2.9<br>(2.6-3.2)    |
| <b>Indonesia</b>       | 2.8<br>(3.1-4.8) | 2.0<br>(1.8-2.3)    | 3.2<br>(2.5-4.2)    | 3.3<br>(2.9-3.9)    | 3.3<br>(3.6-5.6)  | 2.3<br>(2.0-2.6)    | 3.7<br>(2.9-4.8)    | 3.6<br>(3.2-4.2)    | 3.9<br>(4.5-7.0)  | 3.1<br>(2.8-3.5)    | 4.9<br>(3.8-6.4)    | 5.0<br>(4.4-5.5)    | 6.0<br>(5.3-8.2)  | 5.4<br>(4.9-6.1)    | 6.0<br>(4.8-7.6)    | 8.3<br>(7.4-9.4)    |
| <b>Laos</b>            | 2.1<br>(1.7-2.6) | 4.1<br>(3.6-4.6)    | 2.3<br>(1.8-2.9)    | 4.4<br>(3.7-5.0)    | 2.1<br>(1.7-2.6)  | 4.2<br>(3.6-4.7)    | 2.3<br>(1.8-2.9)    | 4.5<br>(3.9-5.1)    | 2.1<br>(1.7-2.6)  | 4.6<br>(4.0-5.2)    | 2.2<br>(1.7-2.7)    | 5.0<br>(4.3-5.7)    | 1.8<br>(1.4-2.2)  | 5.4<br>(4.7-6.1)    | 1.7<br>(1.4-2.2)    | 5.9<br>(5.2-6.7)    |

| Country/Region                     | Males, 1980           |                         | Females, 1980           |                         | Males, 1990           |                         | Females, 1990           |                         | Males, 2000           |                         | Females, 2000           |                         | Males, 2013            |                         | Females, 2013           |                         |
|------------------------------------|-----------------------|-------------------------|-------------------------|-------------------------|-----------------------|-------------------------|-------------------------|-------------------------|-----------------------|-------------------------|-------------------------|-------------------------|------------------------|-------------------------|-------------------------|-------------------------|
|                                    | <20                   | >20                     | <20                     | >20                     | <20                   | >20                     | <20                     | >20                     | <20                   | >20                     | <20                     | >20                     | <20                    | >20                     | <20                     | >20                     |
| <b>Malaysia</b>                    | 6.8<br>(5.4-<br>8.3)  | 8.2<br>(7.2-<br>9.2)    | 5.7<br>(4.5-<br>7.2)    | 12.6<br>(11.1-<br>14.2) | 7.0<br>(5.6-<br>8.5)  | 8.5<br>(7.5-<br>9.7)    | 5.9<br>(4.6-<br>7.3)    | 13.1<br>(11.7-<br>14.6) | 7.8<br>(6.4-<br>9.5)  | 9.8<br>(9.0-<br>10.5)   | 6.4<br>(5.1-<br>8.1)    | 15.1<br>(14.0-<br>16.2) | 8.8<br>(7.1-<br>10.7)  | 11.4<br>(10.2-<br>12.8) | 7.2<br>(5.8-<br>9.0)    | 16.7<br>(15.0-<br>18.6) |
| <b>Maldives</b>                    | 2.7<br>(2.2-<br>3.3)  | 5.6<br>(4.9-<br>6.4)    | 3.1<br>(2.4-<br>3.8)    | 12.4<br>(11.0-<br>14.0) | 3.1<br>(2.5-<br>3.8)  | 6.4<br>(5.7-<br>7.2)    | 3.5<br>(2.7-<br>4.3)    | 13.8<br>(12.2-<br>15.6) | 3.4<br>(2.7-<br>4.1)  | 7.1<br>(6.3-<br>8.0)    | 3.7<br>(3.0-<br>4.6)    | 15.3<br>(13.6-<br>17.1) | 3.8<br>(3.1-<br>4.7)   | 8.1<br>(7.2-<br>9.1)    | 4.2<br>(3.3-<br>5.1)    | 17.0<br>(15.3-<br>18.8) |
| <b>Myanmar</b>                     | 1.8<br>(1.4-<br>2.2)  | 3.6<br>(3.2-<br>4.0)    | 2.7<br>(2.1-<br>3.4)    | 6.8<br>(6.0-<br>7.8)    | 1.7<br>(1.3-<br>2.1)  | 3.4<br>(3.0-<br>3.9)    | 2.6<br>(2.1-<br>3.2)    | 6.6<br>(5.8-<br>7.5)    | 1.7<br>(1.4-<br>2.1)  | 3.7<br>(3.3-<br>4.2)    | 2.6<br>(2.1-<br>3.2)    | 7.2<br>(6.3-<br>8.1)    | 1.9<br>(1.5-<br>2.4)   | 4.5<br>(4.0-<br>5.0)    | 2.8<br>(2.2-<br>3.5)    | 8.4<br>(7.6-<br>9.2)    |
| <b>Philippines</b>                 | 1.7<br>(1.4-<br>2.2)  | 2.8<br>(2.5-<br>3.2)    | 1.5<br>(1.2-<br>1.9)    | 3.8<br>(3.3-<br>4.3)    | 1.9<br>(1.4-<br>2.3)  | 3.0<br>(2.6-<br>3.4)    | 1.6<br>(1.3-<br>2.1)    | 4.0<br>(3.5-<br>4.5)    | 2.1<br>(1.7-<br>2.7)  | 3.4<br>(3.0-<br>3.8)    | 1.9<br>(1.4-<br>2.4)    | 4.9<br>(4.4-<br>5.5)    | 2.6<br>(2.1-<br>3.2)   | 4.1<br>(3.6-<br>4.7)    | 2.1<br>(1.6-<br>2.7)    | 6.2<br>(5.5-<br>7.0)    |
| <b>Sri Lanka</b>                   | 1.6<br>(1.3-<br>1.9)  | 2.2<br>(1.9-<br>2.6)    | 2.1<br>(1.7-<br>2.7)    | 5.3<br>(4.6-<br>6.1)    | 1.5<br>(1.2-<br>1.9)  | 2.2<br>(1.9-<br>2.5)    | 2.1<br>(1.6-<br>2.6)    | 5.2<br>(4.6-<br>5.9)    | 1.7<br>(1.3-<br>2.1)  | 2.6<br>(2.3-<br>3.0)    | 2.1<br>(1.6-<br>2.6)    | 6.1<br>(5.4-<br>6.7)    | 1.9<br>(1.5-<br>2.4)   | 3.3<br>(2.9-<br>3.8)    | 2.2<br>(1.8-<br>2.7)    | 7.0<br>(6.2-<br>7.8)    |
| <b>Thailand</b>                    | 3.4<br>(2.7-<br>4.2)  | 3.3<br>(2.9-<br>3.8)    | 4.3<br>(3.4-<br>5.3)    | 4.8<br>(4.2-<br>5.5)    | 3.4<br>(2.8-<br>4.2)  | 3.4<br>(3.0-<br>3.8)    | 4.2<br>(3.3-<br>5.2)    | 5.1<br>(4.5-<br>5.8)    | 4.4<br>(3.6-<br>5.3)  | 4.6<br>(4.2-<br>5.1)    | 4.6<br>(3.7-<br>5.7)    | 8.6<br>(7.7-<br>9.6)    | 4.9<br>(4.0-<br>6.0)   | 6.5<br>(5.8-<br>7.2)    | 5.6<br>(4.3-<br>6.9)    | 11.2<br>(10.0-<br>12.4) |
| <b>Timor-Leste</b>                 | 3.6<br>(2.9-<br>4.4)  | 3.0<br>(6.6-<br>8.4)    | 3.7<br>(2.9-<br>4.7)    | 1.4<br>(1.2-<br>1.6)    | 3.6<br>(2.9-<br>4.5)  | 3.0<br>(6.5-<br>8.4)    | 3.7<br>(2.9-<br>4.7)    | 1.4<br>(1.2-<br>1.6)    | 3.6<br>(2.9-<br>4.4)  | 3.0<br>(6.6-<br>8.5)    | 3.6<br>(2.8-<br>4.6)    | 1.4<br>(1.2-<br>1.6)    | 3.8<br>(3.1-<br>4.6)   | 3.2<br>(7.2-<br>9.1)    | 3.8<br>(3.1-<br>4.8)    | 1.5<br>(1.3-<br>1.7)    |
| <b>Vietnam</b>                     | 1.4<br>(1.1-<br>1.8)  | 0.9<br>(0.7-<br>1.0)    | 1.6<br>(1.3-<br>2.0)    | 1.1<br>(1.0-<br>1.3)    | 1.5<br>(1.2-<br>1.9)  | 0.9<br>(0.8-<br>1.0)    | 1.7<br>(1.3-<br>2.1)    | 1.2<br>(1.0-<br>1.4)    | 1.9<br>(1.5-<br>2.3)  | 1.1<br>(1.0-<br>1.3)    | 2.0<br>(1.6-<br>2.4)    | 1.3<br>(1.1-<br>1.6)    | 2.5<br>(2.0-<br>3.1)   | 1.5<br>(1.3-<br>1.7)    | 2.5<br>(2.0-<br>3.2)    | 1.7<br>(1.4-<br>1.9)    |
| <b>Southern Latin America</b>      | 8.7<br>(7.5-<br>10.2) | 21.5<br>(20.0-<br>23.1) | 7.3<br>(6.2-<br>8.4)    | 22.8<br>(21.1-<br>24.5) | 8.4<br>(7.2-<br>9.7)  | 20.6<br>(19.0-<br>22.1) | 7.0<br>(5.9-<br>8.1)    | 22.1<br>(20.7-<br>23.8) | 9.5<br>(8.2-<br>11.0) | 21.8<br>(20.3-<br>23.4) | 8.0<br>(6.9-<br>9.2)    | 23.7<br>(22.0-<br>25.3) | 10.1<br>(8.6-<br>11.7) | 21.6<br>(20.0-<br>23.1) | 8.8<br>(7.6-<br>10.2)   | 23.6<br>(22.1-<br>25.3) |
| <b>Argentina</b>                   | 9.0<br>(7.3-<br>11.0) | 22.5<br>(20.4-<br>24.8) | 6.8<br>(5.4-<br>8.4)    | 21.7<br>(19.5-<br>24.1) | 8.6<br>(7.0-<br>10.4) | 21.5<br>(19.2-<br>23.8) | 6.5<br>(5.2-<br>8.0)    | 20.8<br>(18.8-<br>23.2) | 9.5<br>(7.7-<br>11.6) | 22.4<br>(20.2-<br>24.7) | 7.0<br>(5.6-<br>8.6)    | 21.6<br>(19.4-<br>23.8) | 9.4<br>(7.5-<br>11.6)  | 21.2<br>(19.1-<br>23.3) | 6.8<br>(5.3-<br>8.5)    | 20.4<br>(18.3-<br>22.6) |
| <b>Chile</b>                       | 7.9<br>(6.3-<br>9.6)  | 18.5<br>(16.7-<br>20.3) | 6.3<br>(5.0-<br>7.9)    | 25.5<br>(23.0-<br>28.1) | 7.8<br>(6.4-<br>9.5)  | 18.4<br>(16.6-<br>20.3) | 6.3<br>(5.0-<br>7.8)    | 25.6<br>(23.2-<br>28.1) | 9.6<br>(7.8-<br>11.8) | 20.4<br>(18.7-<br>22.1) | 8.7<br>(6.9-<br>10.9)   | 28.3<br>(26.2-<br>30.7) | 11.9<br>(9.6-<br>14.3) | 22.0<br>(20.1-<br>24.1) | 12.4<br>(10.0-<br>15.1) | 30.3<br>(27.9-<br>32.9) |
| <b>Uruguay</b>                     | 9.2<br>(7.6-<br>11.4) | 22.5<br>(20.3-<br>24.9) | 17.3<br>(14.1-<br>21.1) | 24.7<br>(22.5-<br>27.2) | 8.6<br>(7.0-<br>10.6) | 21.2<br>(19.0-<br>23.4) | 16.3<br>(13.2-<br>19.8) | 23.3<br>(21.1-<br>25.6) | 9.4<br>(7.8-<br>11.3) | 22.7<br>(20.4-<br>25.0) | 17.5<br>(14.3-<br>20.8) | 24.7<br>(22.4-<br>27.3) | 9.7<br>(7.8-<br>11.8)  | 23.3<br>(21.1-<br>25.6) | 18.1<br>(14.9-<br>21.9) | 25.4<br>(23.0-<br>27.9) |
| <b>Southern Sub-Saharan Africa</b> | 4.4<br>(3.7-<br>5.3)  | 10.6<br>(9.6-<br>11.8)  | 5.5<br>(4.5-<br>6.5)    | 26.9<br>(24.8-<br>29.2) | 4.7<br>(4.0-<br>5.5)  | 10.4<br>(9.5-<br>11.4)  | 5.8<br>(5.0-<br>6.8)    | 27.0<br>(25.0-<br>28.9) | 4.6<br>(4.1-<br>5.2)  | 10.5<br>(9.7-<br>11.2)  | 6.0<br>(5.4-<br>6.6)    | 29.0<br>(27.8-<br>30.3) | 5.6<br>(4.9-<br>6.4)   | 11.7<br>(10.9-<br>12.4) | 7.4<br>(6.7-<br>8.1)    | 37.0<br>(35.9-<br>38.1) |
| <b>Botswana</b>                    | 1.6<br>(1.3-<br>2.0)  | 5.2<br>(4.6-<br>5.9)    | 6.5<br>(5.2-<br>8.0)    | 21.4<br>(19.2-<br>23.8) | 1.7<br>(1.4-<br>2.2)  | 5.7<br>(5.0-<br>6.4)    | 7.0<br>(5.6-<br>8.8)    | 22.8<br>(20.3-<br>25.3) | 1.7<br>(1.4-<br>2.1)  | 5.6<br>(4.9-<br>6.3)    | 6.9<br>(5.5-<br>8.6)    | 23.1<br>(20.9-<br>25.4) | 1.8<br>(1.4-<br>2.2)   | 5.8<br>(5.2-<br>6.4)    | 7.2<br>(5.8-<br>8.9)    | 24.1<br>(22.0-<br>26.3) |

| Country/Region                | Males, 1980       |                     | Females, 1980     |                     | Males, 1990       |                     | Females, 1990     |                     | Males, 2000       |                     | Females, 2000     |                     | Males, 2013        |                     | Females, 2013     |                     |
|-------------------------------|-------------------|---------------------|-------------------|---------------------|-------------------|---------------------|-------------------|---------------------|-------------------|---------------------|-------------------|---------------------|--------------------|---------------------|-------------------|---------------------|
|                               | <20               | >20                 | <20               | >20                 | <20               | >20                 | <20               | >20                 | <20               | >20                 | <20               | >20                 | <20                | >20                 | <20               | >20                 |
| <b>Lesotho</b>                | 8.7<br>(7.1-10.7) | 4.7<br>(4.2-5.4)    | 8.0<br>(6.2-10.2) | 25.0<br>(22.5-27.4) | 8.9<br>(7.3-10.9) | 4.9<br>(4.3-5.6)    | 8.7<br>(6.9-10.6) | 25.7<br>(23.3-28.4) | 6.5<br>(5.3-7.9)  | 5.9<br>(5.2-6.7)    | 8.2<br>(6.8-9.8)  | 27.7<br>(25.6-29.9) | 4.0<br>(3.2-4.9)   | 6.9<br>(6.2-7.6)    | 5.7<br>(4.6-7.0)  | 31.3<br>(29.7-32.8) |
| <b>Namibia</b>                | 2.5<br>(2.0-3.0)  | 5.6<br>(5.0-6.4)    | 2.4<br>(1.9-3.0)  | 12.1<br>(10.6-13.5) | 2.3<br>(1.9-2.8)  | 5.4<br>(4.7-6.1)    | 2.3<br>(1.8-2.8)  | 11.7<br>(10.5-12.9) | 2.4<br>(1.9-2.9)  | 5.5<br>(4.8-6.2)    | 2.1<br>(1.7-2.7)  | 16.7<br>(15.1-18.5) | 2.6<br>(2.1-3.2)   | 6.0<br>(5.3-6.7)    | 2.3<br>(1.8-3.0)  | 19.8<br>(17.9-21.9) |
| <b>South Africa</b>           | 4.9<br>(3.8-6.2)  | 12.7<br>(11.3-14.2) | 6.2<br>(4.9-7.7)  | 30.2<br>(27.4-33.1) | 5.3<br>(4.3-6.6)  | 12.6<br>(11.3-14.0) | 6.8<br>(5.5-8.3)  | 30.8<br>(28.1-33.5) | 4.9<br>(4.2-5.8)  | 12.4<br>(11.5-13.4) | 6.9<br>(6.1-7.9)  | 32.6<br>(31.2-34.2) | 7.0<br>(6.0-8.2)   | 13.5<br>(12.6-14.5) | 9.6<br>(8.5-10.7) | 42.0<br>(40.6-43.3) |
| <b>Swaziland</b>              | 5.3<br>(4.1-6.6)  | 10.9<br>(9.6-12.1)  | 6.9<br>(5.4-8.6)  | 33.7<br>(31.0-36.7) | 5.3<br>(4.1-6.5)  | 10.8<br>(9.6-12.1)  | 6.8<br>(5.5-8.4)  | 33.5<br>(30.8-36.5) | 4.5<br>(3.6-5.4)  | 10.8<br>(9.7-12.1)  | 6.5<br>(5.4-7.9)  | 34.1<br>(31.6-36.5) | 3.3<br>(2.7-4.1)   | 10.9<br>(9.8-12.2)  | 5.8<br>(4.7-7.2)  | 33.5<br>(31.0-35.9) |
| <b>Zimbabwe</b>               | 3.0<br>(2.4-3.7)  | 4.0<br>(3.5-4.5)    | 2.8<br>(2.1-3.5)  | 14.0<br>(12.4-15.8) | 3.0<br>(2.4-3.7)  | 3.6<br>(3.2-4.1)    | 2.7<br>(2.1-3.3)  | 13.0<br>(11.4-14.5) | 4.2<br>(3.4-5.0)  | 3.7<br>(3.3-4.2)    | 3.4<br>(2.7-4.1)  | 14.4<br>(13.1-15.7) | 3.0<br>(2.4-3.7)   | 4.2<br>(3.7-4.7)    | 2.6<br>(2.0-3.2)  | 17.4<br>(15.8-19.2) |
| <b>Tropical Latin America</b> | 2.8<br>(2.2-3.4)  | 7.5<br>(6.7-8.4)    | 3.2<br>(2.6-4.1)  | 13.9<br>(12.4-15.4) | 3.2<br>(2.6-3.9)  | 7.7<br>(6.9-8.5)    | 3.6<br>(2.9-4.4)  | 14.2<br>(12.8-15.6) | 5.5<br>(4.9-6.2)  | 9.1<br>(8.5-9.7)    | 5.6<br>(5.0-6.3)  | 14.7<br>(13.9-15.5) | 6.8<br>(5.4-8.3)   | 11.9<br>(10.8-13.3) | 7.5<br>(6.0-9.3)  | 20.9<br>(18.9-22.9) |
| <b>Brazil</b>                 | 2.8<br>(2.2-3.4)  | 7.2<br>(6.4-8.2)    | 3.3<br>(2.6-4.2)  | 13.6<br>(12.0-15.1) | 3.2<br>(2.5-3.9)  | 7.4<br>(6.6-8.3)    | 3.6<br>(2.9-4.5)  | 13.8<br>(12.4-15.3) | 5.5<br>(4.9-6.3)  | 8.8<br>(8.2-9.4)    | 5.7<br>(5.1-6.4)  | 14.3<br>(13.6-15.1) | 6.8<br>(5.4-8.4)   | 11.7<br>(10.4-13.0) | 7.6<br>(6.1-9.4)  | 20.6<br>(18.6-22.8) |
| <b>Paraguay</b>               | 3.4<br>(2.8-4.3)  | 18.8<br>(17.0-20.7) | 2.3<br>(1.8-2.9)  | 27.1<br>(24.6-29.7) | 3.6<br>(3.0-4.4)  | 19.1<br>(17.2-21.2) | 2.5<br>(1.9-3.2)  | 27.5<br>(25.0-30.1) | 5.7<br>(4.6-7.1)  | 20.8<br>(18.8-22.8) | 4.7<br>(3.7-6.0)  | 29.6<br>(27.1-32.4) | 6.8<br>(5.4-8.3)   | 21.2<br>(19.2-23.3) | 6.3<br>(4.9-7.9)  | 30.5<br>(28.2-33.2) |
| <b>Western Europe</b>         | 5.5<br>(5.1-6.0)  | 14.5<br>(13.9-15.1) | 5.1<br>(4.8-5.6)  | 15.5<br>(14.9-16.1) | 5.8<br>(5.4-6.2)  | 15.8<br>(15.2-16.4) | 5.3<br>(5.0-5.7)  | 16.8<br>(16.2-17.4) | 6.4<br>(6.0-6.7)  | 18.8<br>(18.3-19.4) | 5.8<br>(5.5-6.1)  | 19.6<br>(19.1-20.1) | 7.2<br>(6.7-7.6)   | 20.5<br>(19.9-21.1) | 6.4<br>(6.0-6.8)  | 21.0<br>(20.4-21.7) |
| <b>Andorra</b>                | 7.1<br>(5.7-8.7)  | 5.8<br>(5.1-6.6)    | 7.7<br>(6.0-9.7)  | 6.6<br>(5.9-7.5)    | 7.7<br>(6.3-9.8)  | 6.3<br>(5.6-7.1)    | 8.3<br>(6.4-10.4) | 7.0<br>(6.2-7.9)    | 8.9<br>(7.2-10.9) | 9.0<br>(8.0-10.2)   | 9.4<br>(7.5-11.7) | 7.6<br>(6.7-8.5)    | 9.3<br>(7.5-11.4)  | 10.6<br>(9.6-11.9)  | 9.5<br>(7.3-12.0) | 7.2<br>(6.3-8.1)    |
| <b>Austria</b>                | 7.1<br>(5.9-8.7)  | 10.2<br>(9.2-11.4)  | 6.0<br>(4.6-7.4)  | 13.5<br>(12.0-15.0) | 8.1<br>(6.5-9.9)  | 11.9<br>(10.7-13.2) | 6.7<br>(5.3-8.3)  | 14.7<br>(13.3-16.4) | 9.5<br>(7.8-11.7) | 17.0<br>(15.3-18.7) | 7.5<br>(6.0-9.4)  | 16.9<br>(15.1-18.7) | 10.3<br>(8.4-12.5) | 18.4<br>(16.6-20.3) | 7.8<br>(6.3-9.7)  | 17.4<br>(15.6-19.4) |
| <b>Belgium</b>                | 4.7<br>(3.8-6.0)  | 14.3<br>(12.8-15.9) | 5.0<br>(3.9-6.2)  | 16.0<br>(14.3-17.8) | 5.0<br>(4.0-6.1)  | 15.9<br>(14.3-17.7) | 5.2<br>(4.0-6.4)  | 17.8<br>(15.8-19.9) | 4.8<br>(3.8-5.9)  | 19.0<br>(17.3-21.2) | 4.5<br>(3.6-5.6)  | 21.0<br>(18.7-23.3) | 4.6<br>(3.7-5.5)   | 20.1<br>(18.0-22.1) | 4.2<br>(3.3-5.1)  | 21.7<br>(19.5-24.1) |
| <b>Cyprus</b>                 | 6.9<br>(5.5-8.6)  | 20.5<br>(18.6-22.6) | 6.1<br>(4.8-7.6)  | 20.8<br>(18.7-23.1) | 7.8<br>(6.1-9.6)  | 22.5<br>(20.1-24.6) | 6.8<br>(5.4-8.6)  | 22.7<br>(20.4-25.0) | 7.8<br>(6.2-9.7)  | 23.1<br>(20.8-25.4) | 7.0<br>(5.5-8.7)  | 23.3<br>(20.9-25.6) | 8.0<br>(6.5-9.9)   | 24.0<br>(21.8-26.5) | 7.4<br>(5.9-9.2)  | 24.1<br>(21.7-26.6) |
| <b>Denmark</b>                | 5.9<br>(4.8-7.3)  | 13.3<br>(11.9-14.9) | 3.9<br>(3.1-4.9)  | 12.7<br>(11.2-14.1) | 6.6<br>(5.4-8.1)  | 14.6<br>(13.1-16.2) | 4.3<br>(3.4-5.3)  | 13.8<br>(12.3-15.4) | 8.0<br>(6.5-9.7)  | 18.2<br>(16.3-20.0) | 5.1<br>(4.0-6.3)  | 17.6<br>(15.8-19.7) | 8.7<br>(7.1-10.7)  | 19.6<br>(17.7-21.9) | 5.9<br>(4.7-7.5)  | 19.9<br>(17.7-22.0) |

| Country/Region     | Males, 1980             |                         | Females, 1980          |                         | Males, 1990             |                         | Females, 1990          |                         | Males, 2000             |                         | Females, 2000           |                         | Males, 2013             |                         | Females, 2013           |                         |
|--------------------|-------------------------|-------------------------|------------------------|-------------------------|-------------------------|-------------------------|------------------------|-------------------------|-------------------------|-------------------------|-------------------------|-------------------------|-------------------------|-------------------------|-------------------------|-------------------------|
|                    | <20                     | >20                     | <20                    | >20                     | <20                     | >20                     | <20                    | >20                     | <20                     | >20                     | <20                     | >20                     | <20                     | >20                     | <20                     | >20                     |
| <b>Finland</b>     | 6.0<br>(4.7-<br>7.4)    | 15.0<br>(13.6-<br>16.7) | 4.3<br>(3.4-<br>5.5)   | 16.7<br>(14.9-<br>18.6) | 6.2<br>(4.9-<br>7.7)    | 16.2<br>(14.5-<br>17.8) | 4.5<br>(3.6-<br>5.6)   | 17.4<br>(15.6-<br>19.2) | 6.8<br>(5.6-<br>8.2)    | 18.3<br>(16.7-<br>19.8) | 5.0<br>(3.9-<br>6.3)    | 19.1<br>(17.6-<br>20.7) | 9.2<br>(7.5-<br>11.2)   | 20.9<br>(18.9-<br>23.2) | 6.6<br>(5.2-<br>8.1)    | 22.3<br>(20.3-<br>24.6) |
| <b>France</b>      | 5.0<br>(4.0-<br>6.1)    | 14.9<br>(13.2-<br>16.6) | 4.0<br>(3.2-<br>5.0)   | 13.4<br>(11.9-<br>15.0) | 5.4<br>(4.4-<br>6.6)    | 16.4<br>(14.7-<br>18.2) | 4.3<br>(3.4-<br>5.4)   | 15.0<br>(13.4-<br>17.0) | 5.5<br>(4.7-<br>6.6)    | 18.5<br>(16.8-<br>20.4) | 4.4<br>(3.6-<br>5.4)    | 18.3<br>(16.6-<br>20.3) | 5.8<br>(4.7-<br>7.0)    | 19.3<br>(17.4-<br>21.4) | 4.7<br>(3.8-<br>5.9)    | 19.7<br>(17.7-<br>21.7) |
| <b>Germany</b>     | 4.4<br>(3.5-<br>5.5)    | 15.9<br>(14.2-<br>17.6) | 4.2<br>(3.4-<br>5.2)   | 17.2<br>(15.4-<br>19.3) | 4.5<br>(3.6-<br>5.4)    | 17.3<br>(15.6-<br>19.1) | 4.3<br>(3.5-<br>5.2)   | 18.7<br>(16.8-<br>20.7) | 4.9<br>(4.1-<br>5.9)    | 19.7<br>(18.3-<br>21.1) | 4.7<br>(3.9-<br>5.7)    | 20.8<br>(19.3-<br>22.3) | 5.5<br>(4.5-<br>6.7)    | 21.9<br>(20.2-<br>23.8) | 5.3<br>(4.2-<br>6.5)    | 22.5<br>(20.5-<br>24.7) |
| <b>Greece</b>      | 5.9<br>(4.8-<br>7.2)    | 15.3<br>(13.5-<br>17.0) | 5.2<br>(4.2-<br>6.6)   | 16.1<br>(14.5-<br>17.9) | 7.3<br>(6.0-<br>8.8)    | 17.3<br>(15.6-<br>19.0) | 6.1<br>(4.9-<br>7.6)   | 17.2<br>(15.5-<br>19.1) | 9.6<br>(8.6-<br>10.7)   | 19.2<br>(17.7-<br>20.7) | 7.3<br>(6.4-<br>8.4)    | 17.2<br>(15.6-<br>18.7) | 10.5<br>(8.7-<br>12.3)  | 19.1<br>(17.4-<br>21.1) | 7.9<br>(6.5-<br>9.6)    | 19.4<br>(17.6-<br>21.4) |
| <b>Iceland</b>     | 7.3<br>(5.9-<br>9.1)    | 20.9<br>(18.8-<br>23.0) | 5.3<br>(4.2-<br>6.7)   | 22.0<br>(19.8-<br>24.3) | 7.4<br>(6.0-<br>9.1)    | 21.1<br>(19.0-<br>23.4) | 5.4<br>(4.2-<br>6.6)   | 22.3<br>(20.0-<br>24.6) | 8.1<br>(6.4-<br>9.9)    | 23.5<br>(21.3-<br>26.0) | 6.1<br>(4.8-<br>7.5)    | 25.0<br>(22.5-<br>27.6) | 9.6<br>(7.9-<br>11.6)   | 26.9<br>(24.4-<br>29.7) | 7.6<br>(6.1-<br>9.4)    | 28.8<br>(26.0-<br>31.5) |
| <b>Ireland</b>     | 5.7<br>(4.6-<br>7.1)    | 13.9<br>(12.4-<br>15.3) | 6.5<br>(5.1-<br>8.1)   | 15.5<br>(13.8-<br>17.4) | 5.8<br>(4.7-<br>7.0)    | 15.0<br>(13.6-<br>16.5) | 6.7<br>(5.3-<br>8.3)   | 16.5<br>(14.8-<br>18.2) | 6.3<br>(5.4-<br>7.5)    | 20.9<br>(19.0-<br>22.9) | 7.2<br>(6.0-<br>8.5)    | 20.9<br>(18.9-<br>23.0) | 6.9<br>(5.7-<br>8.3)    | 22.9<br>(20.8-<br>25.0) | 7.2<br>(5.8-<br>8.8)    | 22.5<br>(20.4-<br>24.7) |
| <b>Israel</b>      | 9.1<br>(7.3-<br>11.3)   | 15.6<br>(14.0-<br>17.2) | 6.3<br>(5.1-<br>7.8)   | 18.7<br>(16.8-<br>20.9) | 10.5<br>(8.5-<br>12.7)  | 17.6<br>(15.8-<br>19.4) | 7.2<br>(5.7-<br>9.1)   | 21.2<br>(19.2-<br>23.3) | 12.9<br>(10.6-<br>15.5) | 20.1<br>(18.6-<br>21.6) | 9.1<br>(7.1-<br>11.2)   | 24.6<br>(22.8-<br>26.3) | 13.9<br>(11.4-<br>16.7) | 21.4<br>(19.4-<br>23.5) | 11.3<br>(9.1-<br>13.8)  | 24.8<br>(22.5-<br>27.0) |
| <b>Italy</b>       | 7.8<br>(6.4-<br>9.6)    | 15.3<br>(13.8-<br>17.0) | 6.4<br>(5.0-<br>8.0)   | 14.4<br>(12.9-<br>16.1) | 7.9<br>(6.4-<br>9.7)    | 15.8<br>(14.2-<br>17.6) | 6.5<br>(5.2-<br>8.1)   | 14.9<br>(13.3-<br>16.5) | 8.1<br>(6.8-<br>9.5)    | 17.6<br>(15.9-<br>19.4) | 6.4<br>(5.3-<br>7.6)    | 17.3<br>(15.6-<br>19.1) | 8.4<br>(7.0-<br>10.0)   | 18.6<br>(16.9-<br>20.4) | 6.2<br>(5.0-<br>7.6)    | 17.7<br>(15.9-<br>19.5) |
| <b>Luxembourg</b>  | 6.0<br>(4.8-<br>7.3)    | 15.9<br>(14.4-<br>17.6) | 10.2<br>(8.1-<br>12.6) | 18.2<br>(16.3-<br>20.6) | 6.8<br>(5.4-<br>8.3)    | 18.0<br>(16.1-<br>19.9) | 11.6<br>(9.2-<br>14.2) | 20.2<br>(18.2-<br>22.4) | 9.2<br>(7.5-<br>11.2)   | 21.7<br>(19.5-<br>24.0) | 12.8<br>(10.3-<br>15.5) | 23.3<br>(21.1-<br>25.7) | 11.1<br>(9.2-<br>13.5)  | 23.7<br>(21.3-<br>26.3) | 13.5<br>(10.9-<br>16.4) | 26.0<br>(23.6-<br>28.7) |
| <b>Malta</b>       | 13.1<br>(10.6-<br>16.1) | 24.8<br>(22.3-<br>27.4) | 5.9<br>(4.6-<br>7.4)   | 22.4<br>(20.2-<br>24.7) | 13.0<br>(10.7-<br>15.8) | 25.0<br>(22.6-<br>27.4) | 6.0<br>(4.7-<br>7.6)   | 22.6<br>(20.5-<br>25.1) | 13.3<br>(10.9-<br>16.0) | 27.7<br>(25.2-<br>30.3) | 7.2<br>(5.8-<br>8.7)    | 25.6<br>(23.1-<br>28.1) | 12.5<br>(10.3-<br>14.9) | 29.0<br>(26.4-<br>31.6) | 7.9<br>(6.3-<br>9.6)    | 27.5<br>(24.9-<br>30.1) |
| <b>Netherlands</b> | 3.4<br>(2.7-<br>4.2)    | 10.8<br>(9.6-<br>12.1)  | 4.2<br>(3.3-<br>5.2)   | 14.0<br>(12.5-<br>15.6) | 3.9<br>(3.1-<br>4.7)    | 11.5<br>(10.2-<br>12.7) | 4.4<br>(3.4-<br>5.5)   | 14.8<br>(13.2-<br>16.5) | 3.7<br>(3.0-<br>4.6)    | 10.0<br>(9.3-<br>10.7)  | 3.8<br>(3.0-<br>4.8)    | 12.5<br>(11.6-<br>13.3) | 4.1<br>(3.4-<br>5.0)    | 12.7<br>(11.6-<br>14.0) | 3.8<br>(3.0-<br>4.7)    | 15.9<br>(14.4-<br>17.4) |
| <b>Norway</b>      | 5.3<br>(4.3-<br>6.5)    | 14.0<br>(12.3-<br>15.7) | 4.0<br>(3.2-<br>5.0)   | 13.5<br>(12.0-<br>15.1) | 5.5<br>(4.5-<br>6.8)    | 14.5<br>(12.8-<br>16.2) | 4.2<br>(3.3-<br>5.3)   | 14.2<br>(12.6-<br>15.8) | 5.3<br>(4.2-<br>6.5)    | 16.7<br>(14.8-<br>18.4) | 4.2<br>(3.3-<br>5.2)    | 16.4<br>(14.4-<br>18.3) | 5.1<br>(4.1-<br>6.3)    | 19.1<br>(17.1-<br>21.4) | 4.0<br>(3.1-<br>5.0)    | 18.0<br>(16.1-<br>20.0) |
| <b>Portugal</b>    | 6.8<br>(5.5-<br>8.2)    | 14.1<br>(12.7-<br>15.9) | 6.9<br>(5.4-<br>8.6)   | 16.4<br>(14.5-<br>18.3) | 8.5<br>(7.0-<br>10.5)   | 17.3<br>(15.4-<br>19.1) | 8.5<br>(6.7-<br>10.6)  | 19.6<br>(17.6-<br>21.8) | 9.3<br>(7.6-<br>11.0)   | 19.0<br>(17.2-<br>21.0) | 10.0<br>(8.2-<br>12.2)  | 21.5<br>(19.4-<br>23.9) | 8.9<br>(7.4-<br>10.9)   | 20.9<br>(19.0-<br>23.1) | 10.6<br>(8.5-<br>12.9)  | 23.4<br>(21.0-<br>25.9) |
| <b>Spain</b>       | 5.7<br>(4.5-<br>7.0)    | 13.8<br>(12.4-<br>15.2) | 5.5<br>(4.4-<br>6.8)   | 15.8<br>(14.1-<br>17.6) | 6.9<br>(5.6-<br>8.4)    | 17.4<br>(16.1-<br>18.7) | 6.3<br>(5.0-<br>7.8)   | 19.3<br>(17.7-<br>20.8) | 8.5<br>(7.1-<br>10.1)   | 22.1<br>(20.7-<br>23.3) | 7.1<br>(5.8-<br>8.8)    | 23.2<br>(21.8-<br>24.8) | 8.4<br>(6.7-<br>10.2)   | 20.2<br>(18.5-<br>22.1) | 7.6<br>(6.0-<br>9.3)    | 20.9<br>(19.0-<br>23.1) |

| Country/Region                    | Males, 1980      |                     | Females, 1980    |                     | Males, 1990      |                     | Females, 1990    |                     | Males, 2000      |                     | Females, 2000    |                     | Males, 2013      |                     | Females, 2013     |                     |
|-----------------------------------|------------------|---------------------|------------------|---------------------|------------------|---------------------|------------------|---------------------|------------------|---------------------|------------------|---------------------|------------------|---------------------|-------------------|---------------------|
|                                   | <20              | >20                 | <20              | >20                 | <20              | >20                 | <20              | >20                 | <20              | >20                 | <20              | >20                 | <20              | >20                 | <20               | >20                 |
| <b>Sweden</b>                     | 3.0<br>(2.5-3.6) | 14.4<br>(12.7-16.0) | 3.4<br>(2.8-4.1) | 15.5<br>(14.0-17.2) | 3.0<br>(2.4-3.7) | 14.9<br>(13.3-16.6) | 3.9<br>(3.1-4.9) | 16.1<br>(14.4-18.0) | 3.6<br>(3.0-4.3) | 17.3<br>(15.4-19.0) | 4.0<br>(3.3-4.8) | 18.4<br>(16.5-20.4) | 4.3<br>(3.6-5.3) | 18.9<br>(17.0-21.0) | 4.0<br>(3.2-5.0)  | 19.8<br>(17.7-21.9) |
| <b>Switzerland</b>                | 6.0<br>(4.9-7.3) | 15.2<br>(13.6-16.9) | 4.5<br>(3.6-5.7) | 14.3<br>(12.6-16.0) | 5.8<br>(4.6-7.0) | 15.0<br>(13.4-16.5) | 4.5<br>(3.5-5.5) | 14.1<br>(12.6-15.7) | 5.7<br>(4.6-7.0) | 16.3<br>(14.6-18.0) | 4.7<br>(3.7-5.9) | 15.4<br>(13.7-17.2) | 6.6<br>(5.4-7.9) | 18.4<br>(16.5-20.1) | 5.5<br>(4.3-6.8)  | 17.0<br>(15.3-18.8) |
| <b>United Kingdom</b>             | 4.7<br>(3.8-5.7) | 13.4<br>(12.1-14.9) | 5.7<br>(4.5-7.1) | 16.2<br>(14.6-18.0) | 4.4<br>(3.6-5.2) | 13.4<br>(12.5-14.3) | 5.5<br>(4.6-6.7) | 16.3<br>(15.4-17.3) | 5.4<br>(4.9-5.8) | 19.9<br>(19.2-20.6) | 6.8<br>(6.3-7.4) | 21.5<br>(20.8-22.2) | 7.4<br>(6.5-8.5) | 24.5<br>(23.4-25.7) | 8.1<br>(7.0-9.3)  | 25.4<br>(24.2-26.6) |
| <b>Western Sub-Saharan Africa</b> | 2.1<br>(1.9-2.3) | 4.2<br>(4.0-4.5)    | 1.8<br>(1.6-2.0) | 6.4<br>(6.0-6.8)    | 2.5<br>(2.3-2.8) | 5.1<br>(4.8-5.4)    | 2.1<br>(1.9-2.3) | 7.2<br>(6.7-7.7)    | 4.0<br>(3.5-4.6) | 8.4<br>(7.8-9.1)    | 3.3<br>(2.9-3.8) | 9.8<br>(9.3-10.4)   | 4.3<br>(3.8-5.0) | 9.4<br>(8.8-10.1)   | 3.2<br>(2.8-3.6)  | 11.9<br>(11.3-12.5) |
| <b>Benin</b>                      | 1.8<br>(1.5-2.2) | 3.9<br>(3.4-4.5)    | 1.3<br>(1.1-1.7) | 5.0<br>(4.3-5.7)    | 2.1<br>(1.7-2.7) | 4.6<br>(4.0-5.2)    | 1.6<br>(1.2-2.0) | 5.8<br>(5.1-6.6)    | 2.9<br>(2.3-3.6) | 6.6<br>(5.8-7.4)    | 2.1<br>(1.7-2.6) | 8.5<br>(7.6-9.6)    | 4.7<br>(3.8-5.8) | 9.4<br>(11.4)       | 3.2<br>(4.1)      | 10.0<br>(8.9-11.2)  |
| <b>Burkina Faso</b>               | 2.2<br>(1.7-2.8) | 4.7<br>(4.1-5.3)    | 1.4<br>(1.1-1.8) | 1.5<br>(1.3-1.8)    | 2.9<br>(2.3-3.6) | 6.2<br>(5.5-7.0)    | 1.8<br>(1.4-2.2) | 2.0<br>(1.8-2.3)    | 3.6<br>(2.9-4.4) | 7.8<br>(6.9-8.8)    | 2.6<br>(2.1-3.2) | 3.2<br>(2.8-3.6)    | 3.7<br>(2.9-4.5) | 8.2<br>(7.3-9.2)    | 3.0<br>(2.4-3.8)  | 4.6<br>(4.1-5.2)    |
| <b>Cameroon</b>                   | 3.3<br>(2.7-4.1) | 6.4<br>(5.6-7.1)    | 2.4<br>(1.8-3.0) | 13.5<br>(12.1-15.2) | 3.2<br>(2.6-3.9) | 6.1<br>(5.4-6.9)    | 2.3<br>(1.8-2.9) | 13.2<br>(11.8-14.6) | 4.6<br>(3.8-5.5) | 7.1<br>(6.4-7.8)    | 3.2<br>(2.6-3.9) | 16.8<br>(15.5-18.2) | 4.8<br>(3.9-5.8) | 8.5<br>(7.5-9.5)    | 3.6<br>(2.9-4.5)  | 20.1<br>(18.2-22.0) |
| <b>Cape Verde</b>                 | 2.3<br>(1.8-2.8) | 4.6<br>(4.1-5.2)    | 3.7<br>(2.9-4.5) | 10.6<br>(9.2-11.9)  | 2.8<br>(2.2-3.4) | 5.7<br>(5.1-6.4)    | 4.4<br>(3.5-5.6) | 12.5<br>(11.0-14.1) | 2.8<br>(2.3-3.5) | 6.1<br>(5.4-6.7)    | 4.6<br>(3.6-5.7) | 13.6<br>(12.1-15.1) | 3.3<br>(2.6-4.0) | 7.0<br>(6.2-7.8)    | 5.2<br>(4.1-6.5)  | 15.4<br>(13.9-17.1) |
| <b>Chad</b>                       | 2.1<br>(1.7-2.6) | 4.5<br>(3.9-5.0)    | 1.9<br>(1.5-2.4) | 1.8<br>(1.5-2.0)    | 2.1<br>(1.7-2.6) | 4.7<br>(4.1-5.3)    | 1.9<br>(1.5-2.5) | 1.8<br>(1.6-2.1)    | 2.5<br>(2.1-3.1) | 5.7<br>(5.1-6.5)    | 2.3<br>(1.8-2.8) | 2.4<br>(2.1-2.7)    | 2.9<br>(2.3-3.5) | 6.4<br>(5.6-7.2)    | 2.6<br>(2.0-3.3)  | 2.8<br>(2.4-3.2)    |
| <b>Cote d'Ivoire</b>              | 3.1<br>(2.5-3.8) | 2.7<br>(2.4-3.1)    | 2.4<br>(1.9-3.0) | 5.0<br>(4.4-5.7)    | 2.7<br>(2.2-3.2) | 2.6<br>(2.3-3.0)    | 2.1<br>(1.7-2.6) | 4.6<br>(4.1-5.1)    | 2.7<br>(2.2-3.3) | 4.9<br>(4.4-5.6)    | 2.6<br>(2.1-3.3) | 9.0<br>(8.0-10.0)   | 2.7<br>(2.2-3.3) | 6.2<br>(5.4-7.0)    | 2.8<br>(2.2-3.4)  | 11.4<br>(10.1-12.7) |
| <b>Ghana</b>                      | 1.6<br>(1.2-2.0) | 3.7<br>(3.3-4.3)    | 1.3<br>(1.0-1.7) | 4.6<br>(3.9-5.2)    | 1.8<br>(1.4-2.2) | 4.3<br>(3.8-4.9)    | 1.5<br>(1.2-1.9) | 5.2<br>(4.6-5.9)    | 2.3<br>(1.9-2.8) | 6.1<br>(5.4-6.9)    | 2.0<br>(1.6-2.5) | 9.2<br>(8.3-10.2)   | 2.6<br>(2.1-3.2) | 8.1<br>(7.2-9.2)    | 2.3<br>(1.9-2.9)  | 14.0<br>(12.6-15.7) |
| <b>Guinea</b>                     | 2.8<br>(2.2-3.5) | 2.2<br>(1.9-2.5)    | 3.3<br>(2.6-4.1) | 6.2<br>(5.4-7.0)    | 2.8<br>(2.2-3.4) | 2.2<br>(2.0-2.5)    | 3.2<br>(2.4-4.0) | 6.1<br>(5.3-6.9)    | 2.6<br>(2.1-3.1) | 2.3<br>(2.0-2.6)    | 3.2<br>(2.5-4.0) | 7.3<br>(6.5-8.2)    | 2.8<br>(2.2-3.5) | 2.5<br>(2.2-2.7)    | 3.5<br>(2.7-4.3)  | 9.8<br>(8.9-10.9)   |
| <b>Guinea-Bissau</b>              | 3.1<br>(2.5-3.9) | 6.6<br>(5.9-7.5)    | 3.4<br>(2.7-4.3) | 10.7<br>(9.5-12.1)  | 3.7<br>(3.0-4.5) | 7.8<br>(6.9-8.8)    | 4.0<br>(3.2-4.9) | 12.3<br>(10.9-13.8) | 5.1<br>(4.1-6.2) | 11.1<br>(9.9-12.4)  | 5.5<br>(4.3-6.7) | 17.0<br>(15.1-18.8) | 8.1<br>(6.6-9.8) | 16.8<br>(15.1-18.6) | 8.3<br>(6.7-10.3) | 24.2<br>(21.8-26.7) |
| <b>Liberia</b>                    | 4.4<br>(3.6-5.5) | 13.7<br>(12.2-15.4) | 2.8<br>(2.2-3.6) | 14.9<br>(13.4-16.7) | 4.1<br>(3.3-5.2) | 13.1<br>(11.7-14.6) | 2.7<br>(2.0-3.4) | 14.4<br>(12.8-16.0) | 4.2<br>(3.4-5.2) | 13.3<br>(12.0-14.7) | 2.7<br>(2.0-3.4) | 17.3<br>(15.6-19.2) | 4.8<br>(3.9-5.9) | 14.9<br>(13.7-16.1) | 3.0<br>(2.4-3.8)  | 22.1<br>(20.0-24.0) |

| Country/Region               | Males, 1980      |                  | Females, 1980    |                     | Males, 1990       |                  | Females, 1990    |                     | Males, 2000      |                    | Females, 2000    |                     | Males, 2013      |                     | Females, 2013    |                     |
|------------------------------|------------------|------------------|------------------|---------------------|-------------------|------------------|------------------|---------------------|------------------|--------------------|------------------|---------------------|------------------|---------------------|------------------|---------------------|
|                              | <20              | >20              | <20              | >20                 | <20               | >20              | <20              | >20                 | <20              | >20                | <20              | >20                 | <20              | >20                 | <20              | >20                 |
| <b>Mali</b>                  | 1.8<br>(1.5-2.3) | 4.0<br>(3.5-4.6) | 1.6<br>(1.2-2.0) | 6.7<br>(5.8-7.6)    | 2.3<br>(1.9-2.9)  | 5.1<br>(4.5-5.8) | 2.0<br>(1.5-2.5) | 8.4<br>(7.4-9.4)    | 2.7<br>(2.2-3.2) | 5.9<br>(5.2-6.7)   | 2.8<br>(2.2-3.4) | 12.6<br>(11.2-14.1) | 3.6<br>(2.9-4.5) | 7.4<br>(6.6-8.4)    | 4.1<br>(3.2-5.1) | 18.2<br>(16.5-20.0) |
| <b>Mauritania</b>            | 2.2<br>(1.8-2.8) | 4.7<br>(4.2-5.4) | 3.0<br>(2.4-3.7) | 18.8<br>(16.9-21.2) | 2.7<br>(2.2-3.3)  | 5.8<br>(5.1-6.5) | 3.6<br>(2.8-4.6) | 22.2<br>(20.0-24.5) | 2.8<br>(2.3-3.4) | 6.2<br>(5.5-7.0)   | 3.8<br>(3.1-4.6) | 25.8<br>(24.0-27.6) | 2.8<br>(2.3-3.5) | 6.4<br>(5.7-7.3)    | 3.8<br>(3.0-4.7) | 27.6<br>(25.3-30.4) |
| <b>Niger</b>                 | 1.9<br>(1.5-2.3) | 2.5<br>(2.2-2.8) | 1.5<br>(1.2-1.9) | 3.5<br>(3.1-4.0)    | 1.9<br>(1.5-2.3)  | 2.6<br>(2.2-2.9) | 1.5<br>(1.2-1.9) | 3.5<br>(3.1-4.0)    | 2.1<br>(1.7-2.5) | 2.9<br>(2.5-3.3)   | 2.1<br>(1.6-2.6) | 4.6<br>(4.0-5.2)    | 2.9<br>(2.3-3.5) | 3.4<br>(3.0-3.9)    | 2.5<br>(2.0-3.1) | 5.9<br>(5.3-6.5)    |
| <b>Nigeria</b>               | 1.8<br>(1.4-2.2) | 3.9<br>(3.4-4.4) | 1.6<br>(1.2-2.0) | 5.8<br>(5.1-6.6)    | 2.5<br>(2.1-3.1)  | 5.4<br>(4.8-6.1) | 2.0<br>(1.6-2.5) | 7.1<br>(6.2-8.0)    | 5.2<br>(4.2-6.3) | 11.1<br>(9.8-12.5) | 4.1<br>(3.3-5.2) | 9.4<br>(8.4-10.4)   | 5.4<br>(4.4-6.7) | 11.8<br>(10.5-13.3) | 3.2<br>(2.4-4.2) | 10.4<br>(9.3-11.6)  |
| <b>Sao Tome and Principe</b> | 2.8<br>(2.3-3.5) | 4.3<br>(3.9-4.9) | 3.8<br>(2.9-4.7) | 11.3<br>(9.9-12.7)  | 3.1<br>(2.4-3.8)  | 4.8<br>(4.2-5.4) | 4.1<br>(3.1-5.3) | 12.1<br>(10.7-13.7) | 3.5<br>(2.8-4.4) | 5.7<br>(5.1-6.4)   | 4.7<br>(3.7-6.0) | 14.5<br>(12.9-16.0) | 4.4<br>(3.6-5.5) | 7.1<br>(6.4-7.9)    | 5.8<br>(4.5-7.3) | 17.6<br>(16.0-19.2) |
| <b>Senegal</b>               | 1.3<br>(1.0-1.6) | 8.0<br>(7.1-9.0) | 1.7<br>(1.3-2.2) | 10.9<br>(9.7-12.2)  | 1.5<br>(1.2-1.8)  | 8.2<br>(7.3-9.2) | 1.8<br>(1.5-2.3) | 11.4<br>(10.3-12.7) | 1.6<br>(1.3-1.9) | 8.9<br>(7.8-10.0)  | 2.0<br>(1.6-2.5) | 16.9<br>(15.4-18.7) | 1.6<br>(1.3-1.9) | 10.3<br>(9.4-11.3)  | 2.1<br>(1.6-2.6) | 21.1<br>(19.7-22.6) |
| <b>Sierra Leone</b>          | 5.4<br>(4.4-6.6) | 4.3<br>(3.8-4.9) | 4.6<br>(3.6-5.7) | 9.6<br>(8.5-10.9)   | 5.4<br>(4.4-6.6)  | 4.4<br>(3.9-5.0) | 4.7<br>(3.6-5.8) | 9.9<br>(8.7-11.2)   | 5.5<br>(4.6-6.8) | 4.8<br>(4.2-5.4)   | 5.2<br>(4.3-6.5) | 10.9<br>(9.6-12.2)  | 6.4<br>(5.3-7.7) | 5.2<br>(4.7-5.9)    | 7.2<br>(5.9-8.7) | 11.9<br>(10.8-13.1) |
| <b>The Gambia</b>            | 7.4<br>(6.0-9.2) | 5.3<br>(4.7-6.1) | 4.1<br>(3.2-5.1) | 11.8<br>(10.4-13.2) | 9.0<br>(7.3-10.9) | 6.1<br>(5.4-7.0) | 4.6<br>(3.6-5.6) | 13.1<br>(11.5-14.7) | 7.6<br>(6.6-8.6) | 6.7<br>(5.9-7.5)   | 4.8<br>(3.8-6.1) | 14.5<br>(12.8-16.3) | 3.8<br>(3.0-4.6) | 8.4<br>(7.6-9.3)    | 6.1<br>(4.9-7.6) | 18.1<br>(16.8-19.5) |
| <b>Togo</b>                  | 1.8<br>(1.5-2.3) | 2.5<br>(2.2-2.8) | 1.7<br>(1.3-2.1) | 4.1<br>(3.6-4.7)    | 1.9<br>(1.5-2.3)  | 2.6<br>(2.3-3.0) | 1.7<br>(1.4-2.2) | 4.4<br>(3.9-5.0)    | 2.1<br>(1.7-2.5) | 3.1<br>(2.7-3.5)   | 1.9<br>(1.5-2.4) | 7.0<br>(6.2-7.8)    | 2.2<br>(1.8-2.8) | 3.4<br>(3.0-3.8)    | 1.8<br>(1.4-2.2) | 11.3<br>(10.0-12.5) |

**Webtable 11 Prevalence of obesity by age across birth cohorts for males and females in developed and developing countries with 95% confidence intervals**

| Location         | Birth Year | Sex    | Age |      |      |      |      |      |      |                     |                     |                     |                     |                     |                     |                     |                     |                     |
|------------------|------------|--------|-----|------|------|------|------|------|------|---------------------|---------------------|---------------------|---------------------|---------------------|---------------------|---------------------|---------------------|---------------------|
|                  |            |        | 7.5 | 12.5 | 17.5 | 22.5 | 27.5 | 32.5 | 37.5 | 42.5                | 47.5                | 52.5                | 57.5                | 62.5                | 67.5                | 72.5                | 77.5                |                     |
| <b>Developed</b> | 1935       | Female |     |      |      |      |      |      |      |                     |                     | 19.6<br>(17.6-21.8) | 23.2<br>(21.3-25.0) | 25.9<br>(24.1-27.6) | 27.5<br>(25.8-29.3) | 29.7<br>(28.0-31.3) | 29.1<br>(27.5-30.7) | 26.2<br>(24.3-27.9) |
| <b>Developed</b> | 1940       | Female |     |      |      |      |      |      |      | 17.2<br>(15.3-19.3) | 20.8<br>(18.7-22.8) | 24.2<br>(22.5-26.0) | 27.9<br>(26.0-29.8) | 30.1<br>(28.6-31.6) | 31.1<br>(29.5-32.7) | 30.6<br>(28.6-32.5) |                     |                     |

| Location  | Birth Year | Sex    | Age              |                  |                  |                     |                     |                     |                     |                     |                     |                     |                     |                     |                     |                     |                     |                     |
|-----------|------------|--------|------------------|------------------|------------------|---------------------|---------------------|---------------------|---------------------|---------------------|---------------------|---------------------|---------------------|---------------------|---------------------|---------------------|---------------------|---------------------|
|           |            |        | 7.5              | 12.5             | 17.5             | 22.5                | 27.5                | 32.5                | 37.5                | 42.5                | 47.5                | 52.5                | 57.5                | 62.5                | 67.5                | 72.5                | 77.5                |                     |
| Developed | 1945       | Female |                  |                  |                  |                     |                     |                     |                     | 14.4<br>(12.6-16.3) | 16.9<br>(15.4-18.7) | 20.5<br>(19.0-22.0) | 23.8<br>(22.1-25.4) | 28.1<br>(26.4-29.7) | 29.6<br>(28.1-31.2) | 29.2<br>(27.5-30.9) |                     |                     |
| Developed | 1950       | Female |                  |                  |                  |                     |                     |                     | 12.1<br>(10.5-13.9) | 15.4<br>(13.9-17.1) | 17.8<br>(16.4-19.2) | 21.9<br>(20.6-23.2) | 26.5<br>(25.0-28.0) | 29.4<br>(27.9-31.0) | 30.8<br>(29.0-32.8) |                     |                     |                     |
| Developed | 1955       | Female |                  |                  |                  |                     |                     | 10.1<br>(8.8-11.7)  | 13.1<br>(11.7-14.6) | 16.0<br>(14.8-17.3) | 19.2<br>(18.0-20.6) | 25.7<br>(24.2-27.2) | 28.9<br>(27.3-30.4) | 30.5<br>(28.5-32.6) |                     |                     |                     |                     |
| Developed | 1960       | Female |                  |                  |                  | 7.6<br>(6.4-8.9)    | 10.6<br>(9.4-11.8)  | 13.5<br>(12.4-14.8) | 16.5<br>(15.4-17.8) | 22.1<br>(20.8-23.6) | 26.7<br>(25.1-28.2) | 29.4<br>(27.5-31.6) |                     |                     |                     |                     |                     |                     |
| Developed | 1965       | Female |                  |                  | 4.6<br>(3.8-5.6) | 7.8<br>(6.9-8.8)    | 10.8<br>(9.8-11.9)  | 13.9<br>(12.9-14.9) | 19.3<br>(18.1-20.6) | 23.1<br>(21.8-24.6) | 25.9<br>(24.1-27.9) |                     |                     |                     |                     |                     |                     |                     |
| Developed | 1970       | Female |                  | 4.4<br>(3.8-5.1) | 4.6<br>(4.0-5.3) | 7.9<br>(7.1-8.8)    | 11.7<br>(10.8-12.6) | 16.6<br>(15.4-17.7) | 20.1<br>(19.0-21.4) | 22.6<br>(21.1-24.2) |                     |                     |                     |                     |                     |                     |                     |                     |
| Developed | 1975       | Female | 5.7<br>(5.0-6.5) | 4.3<br>(3.9-4.9) | 4.5<br>(4.0-5.0) | 8.3<br>(7.7-9.1)    | 14.3<br>(13.3-15.3) | 18.2<br>(17.1-19.3) | 20.5<br>(19.1-21.9) |                     |                     |                     |                     |                     |                     |                     |                     |                     |
| Developed | 1980       | Female | 6.0<br>(5.4-6.6) | 4.6<br>(4.3-5.0) | 4.9<br>(4.5-5.4) | 10.7<br>(9.8-11.7)  | 15.4<br>(14.4-16.3) | 19.1<br>(17.9-20.3) |                     |                     |                     |                     |                     |                     |                     |                     |                     |                     |
| Developed | 1985       | Female | 6.6<br>(6.1-7.1) | 5.0<br>(4.6-5.4) | 6.6<br>(6.0-7.2) | 12.3<br>(11.4-13.3) | 16.0<br>(14.8-17.3) |                     |                     |                     |                     |                     |                     |                     |                     |                     |                     |                     |
| Developed | 1990       | Female | 6.8<br>(6.2-7.3) | 6.5<br>(6.1-7.1) | 7.4<br>(6.8-8.0) | 12.8<br>(11.8-14.0) |                     |                     |                     |                     |                     |                     |                     |                     |                     |                     |                     |                     |
| Developed | 1995       | Female | 7.6<br>(7.0-8.1) | 7.4<br>(6.8-8.0) | 8.0<br>(7.4-8.7) |                     |                     |                     |                     |                     |                     |                     |                     |                     |                     |                     |                     |                     |
| Developed | 2000       | Female | 8.5<br>(7.9-9.1) | 7.5<br>(6.8-8.3) |                  |                     |                     |                     |                     |                     |                     |                     |                     |                     |                     |                     |                     |                     |
| Developed | 2005       | Female | 8.8<br>(8.2-9.6) |                  |                  |                     |                     |                     |                     |                     |                     |                     |                     |                     |                     |                     |                     |                     |
| Developed | 1935       | Male   |                  |                  |                  |                     |                     |                     |                     |                     |                     | 15.0<br>(13.5-16.6) | 16.7<br>(15.3-18.2) | 18.5<br>(17.1-19.9) | 19.9<br>(18.5-21.5) | 21.2<br>(19.9-22.4) | 21.4<br>(20.2-22.6) | 20.8<br>(19.5-22.2) |



| Location  | Birth Year | Sex  | Age              |                  |                  |                     |                     |                     |                     |                     |                     |                     |                     |                     |                     |                     |                     |  |
|-----------|------------|------|------------------|------------------|------------------|---------------------|---------------------|---------------------|---------------------|---------------------|---------------------|---------------------|---------------------|---------------------|---------------------|---------------------|---------------------|--|
|           |            |      | 7.5              | 12.5             | 17.5             | 22.5                | 27.5                | 32.5                | 37.5                | 42.5                | 47.5                | 52.5                | 57.5                | 62.5                | 67.5                | 72.5                | 77.5                |  |
| Developed | 1940       | Male |                  |                  |                  |                     |                     |                     |                     |                     | 13.8<br>(12.3-15.2) | 15.2<br>(13.9-16.6) | 17.4<br>(16.1-18.8) | 19.3<br>(17.7-21.0) | 22.6<br>(21.3-23.9) | 22.7<br>(21.3-24.1) | 22.4<br>(20.9-23.9) |  |
| Developed | 1945       | Male |                  |                  |                  |                     |                     |                     |                     | 12.1<br>(10.8-13.5) | 14.8<br>(13.3-16.2) | 16.0<br>(14.8-17.4) | 18.9<br>(17.4-20.4) | 21.5<br>(20.1-23.0) | 24.5<br>(23.3-25.8) | 23.4<br>(21.9-25.0) |                     |  |
| Developed | 1950       | Male |                  |                  |                  |                     |                     |                     | 10.8<br>(9.5-12.2)  | 12.3<br>(11.1-13.5) | 15.3<br>(14.2-16.6) | 17.3<br>(16.1-18.6) | 21.0<br>(19.7-22.3) | 23.2<br>(22.0-24.6) | 24.8<br>(23.2-26.3) |                     |                     |  |
| Developed | 1955       | Male |                  |                  |                  |                     | 9.3<br>(8.2-10.7)   | 11.1<br>(9.9-12.3)  | 13.0<br>(12.0-14.0) | 16.3<br>(15.1-17.6) | 19.5<br>(18.2-20.7) | 23.2<br>(21.9-24.5) | 24.4<br>(22.8-26.1) |                     |                     |                     |                     |  |
| Developed | 1960       | Male |                  |                  |                  | 7.4<br>(6.4-8.6)    | 9.5<br>(8.5-10.7)   | 11.5<br>(10.5-12.5) | 14.4<br>(13.3-15.5) | 19.5<br>(18.3-20.8) | 21.4<br>(20.1-22.8) | 24.5<br>(22.9-26.1) |                     |                     |                     |                     |                     |  |
| Developed | 1965       | Male |                  |                  | 5.3<br>(4.5-6.1) | 7.5<br>(6.7-8.4)    | 9.8<br>(9.0-10.8)   | 12.5<br>(11.6-13.5) | 17.1<br>(16.1-18.3) | 21.8<br>(20.6-23.1) | 22.4<br>(21.0-23.8) |                     |                     |                     |                     |                     |                     |  |
| Developed | 1970       | Male |                  | 5.1<br>(4.5-5.9) | 5.3<br>(4.7-6.0) | 7.7<br>(7.0-8.4)    | 10.8<br>(10.0-11.6) | 14.8<br>(13.7-15.9) | 19.3<br>(18.2-20.5) | 22.2<br>(20.9-23.4) |                     |                     |                     |                     |                     |                     |                     |  |
| Developed | 1975       | Male | 5.4<br>(4.9-6.0) | 5.1<br>(4.6-5.6) | 5.3<br>(4.8-5.8) | 8.1<br>(7.4-8.7)    | 12.5<br>(11.6-13.5) | 16.3<br>(15.3-17.2) | 19.8<br>(18.5-21.0) |                     |                     |                     |                     |                     |                     |                     |                     |  |
| Developed | 1980       | Male | 5.7<br>(5.2-6.2) | 5.4<br>(5.0-5.8) | 5.8<br>(5.3-6.3) | 10.2<br>(9.4-11.1)  | 14.1<br>(13.2-15.0) | 17.4<br>(16.3-18.4) |                     |                     |                     |                     |                     |                     |                     |                     |                     |  |
| Developed | 1985       | Male | 6.1<br>(5.6-6.6) | 5.9<br>(5.5-6.3) | 7.3<br>(6.7-7.9) | 11.3<br>(10.5-12.2) | 15.5<br>(14.5-16.7) |                     |                     |                     |                     |                     |                     |                     |                     |                     |                     |  |
| Developed | 1990       | Male | 6.4<br>(5.9-6.9) | 7.1<br>(6.7-7.6) | 8.3<br>(7.7-8.9) | 11.8<br>(10.8-12.7) |                     |                     |                     |                     |                     |                     |                     |                     |                     |                     |                     |  |
| Developed | 1995       | Male | 7.4<br>(6.9-7.9) | 8.2<br>(7.6-8.8) | 8.6<br>(7.9-9.3) |                     |                     |                     |                     |                     |                     |                     |                     |                     |                     |                     |                     |  |
| Developed | 2000       | Male | 8.0<br>(7.5-8.6) | 8.4<br>(7.7-9.2) |                  |                     |                     |                     |                     |                     |                     |                     |                     |                     |                     |                     |                     |  |
| Developed | 2005       | Male | 8.1<br>(7.5-8.8) |                  |                  |                     |                     |                     |                     |                     |                     |                     |                     |                     |                     |                     |                     |  |

| Location   | Birth Year | Sex    | Age              |                  |                  |                  |                  |                  |                     |                     |                     |                     |                     |                     |                     |                     |                     |                     |
|------------|------------|--------|------------------|------------------|------------------|------------------|------------------|------------------|---------------------|---------------------|---------------------|---------------------|---------------------|---------------------|---------------------|---------------------|---------------------|---------------------|
|            |            |        | 7.5              | 12.5             | 17.5             | 22.5             | 27.5             | 32.5             | 37.5                | 42.5                | 47.5                | 52.5                | 57.5                | 62.5                | 67.5                | 72.5                | 77.5                |                     |
| Developing | 1935       | Female |                  |                  |                  |                  |                  |                  |                     |                     |                     | 8.2<br>(7.5-8.9)    | 9.8<br>(9.0-10.7)   | 10.5<br>(9.7-11.4)  | 11.0<br>(10.3-11.8) | 11.1<br>(10.4-11.8) | 12.3<br>(11.6-13.1) | 11.7<br>(10.9-12.5) |
| Developing | 1940       | Female |                  |                  |                  |                  |                  |                  |                     | 7.7<br>(7.0-8.4)    | 8.6<br>(7.9-9.4)    | 10.3<br>(9.5-11.2)  | 11.1<br>(10.3-11.8) | 12.2<br>(11.4-12.9) | 12.2<br>(11.5-12.9) | 13.0<br>(12.2-14.0) |                     |                     |
| Developing | 1945       | Female |                  |                  |                  |                  |                  |                  |                     | 6.7<br>(6.1-7.2)    | 8.0<br>(7.4-8.6)    | 8.9<br>(8.2-9.6)    | 11.0<br>(10.2-11.9) | 12.2<br>(11.5-13.0) | 13.2<br>(12.5-13.9) | 13.3<br>(12.5-14.2) |                     |                     |
| Developing | 1950       | Female |                  |                  |                  |                  |                  | 5.4<br>(5.0-5.9) | 6.9<br>(6.4-7.5)    | 8.2<br>(7.6-8.8)    | 9.4<br>(8.8-10.0)   | 12.1<br>(11.4-12.8) | 13.1<br>(12.4-13.7) | 14.1<br>(13.3-15.0) |                     |                     |                     |                     |
| Developing | 1955       | Female |                  |                  |                  |                  | 4.1<br>(3.7-4.4) | 5.5<br>(5.1-6.0) | 7.0<br>(6.5-7.6)    | 8.7<br>(8.2-9.2)    | 10.7<br>(10.1-11.2) | 12.7<br>(12.1-13.3) | 13.8<br>(13.1-14.7) |                     |                     |                     |                     |                     |
| Developing | 1960       | Female |                  |                  |                  | 3.1<br>(2.8-3.4) | 4.4<br>(4.0-4.8) | 5.9<br>(5.5-6.4) | 7.9<br>(7.4-8.4)    | 10.2<br>(9.7-10.7)  | 12.1<br>(11.6-12.7) | 13.9<br>(13.2-14.8) |                     |                     |                     |                     |                     |                     |
| Developing | 1965       | Female |                  |                  | 1.9<br>(1.7-2.1) | 3.2<br>(2.9-3.5) | 4.5<br>(4.2-4.9) | 6.2<br>(5.8-6.6) | 8.6<br>(8.2-9.1)    | 11.1<br>(10.6-11.6) | 12.9<br>(12.3-13.7) |                     |                     |                     |                     |                     |                     |                     |
| Developing | 1970       | Female |                  | 2.4<br>(2.1-2.7) | 2.0<br>(1.8-2.2) | 3.3<br>(3.0-3.6) | 4.7<br>(4.4-5.1) | 7.0<br>(6.6-7.4) | 9.3<br>(8.9-9.8)    | 11.7<br>(11.0-12.3) |                     |                     |                     |                     |                     |                     |                     |                     |
| Developing | 1975       | Female | 4.4<br>(3.9-5.1) | 2.5<br>(2.3-2.9) | 2.1<br>(1.9-2.4) | 3.6<br>(3.3-4.0) | 5.4<br>(5.1-5.7) | 8.0<br>(7.6-8.5) | 10.5<br>(10.0-11.0) |                     |                     |                     |                     |                     |                     |                     |                     |                     |
| Developing | 1980       | Female | 4.8<br>(4.2-5.4) | 2.8<br>(2.5-3.1) | 2.3<br>(2.1-2.6) | 4.2<br>(3.9-4.5) | 6.4<br>(6.1-6.7) | 9.3<br>(8.8-9.8) |                     |                     |                     |                     |                     |                     |                     |                     |                     |                     |
| Developing | 1985       | Female | 5.0<br>(4.5-5.7) | 2.9<br>(2.6-3.3) | 2.5<br>(2.3-2.7) | 4.6<br>(4.3-4.9) | 7.2<br>(6.8-7.6) |                  |                     |                     |                     |                     |                     |                     |                     |                     |                     |                     |
| Developing | 1990       | Female | 5.3<br>(4.7-5.9) | 3.1<br>(2.8-3.4) | 2.6<br>(2.4-2.8) | 4.9<br>(4.6-5.3) |                  |                  |                     |                     |                     |                     |                     |                     |                     |                     |                     |                     |
| Developing | 1995       | Female | 5.2<br>(4.7-5.8) | 3.3<br>(3.0-3.6) | 2.8<br>(2.6-3.0) |                  |                  |                  |                     |                     |                     |                     |                     |                     |                     |                     |                     |                     |
| Developing | 2000       | Female | 5.3<br>(4.9-5.8) | 3.5<br>(3.2-3.8) |                  |                  |                  |                  |                     |                     |                     |                     |                     |                     |                     |                     |                     |                     |

| Location   | Birth Year | Sex    | Age              |                  |                  |                  |                  |                  |                  |                  |                  |                  |                  |                  |                  |                  |                  |
|------------|------------|--------|------------------|------------------|------------------|------------------|------------------|------------------|------------------|------------------|------------------|------------------|------------------|------------------|------------------|------------------|------------------|
|            |            |        | 7.5              | 12.5             | 17.5             | 22.5             | 27.5             | 32.5             | 37.5             | 42.5             | 47.5             | 52.5             | 57.5             | 62.5             | 67.5             | 72.5             | 77.5             |
| Developing | 2005       | Female | 5.4<br>(4.9-5.9) |                  |                  |                  |                  |                  |                  |                  |                  |                  |                  |                  |                  |                  |                  |
| Developing | 1935       | Male   |                  |                  |                  |                  |                  |                  |                  |                  | 5.2<br>(4.8-5.7) | 5.6<br>(5.1-6.1) | 6.0<br>(5.4-6.5) | 6.1<br>(5.6-6.7) | 6.3<br>(5.8-6.8) | 6.3<br>(5.9-6.8) | 6.9<br>(6.3-7.5) |
| Developing | 1940       | Male   |                  |                  |                  |                  |                  |                  |                  | 5.0<br>(4.5-5.4) | 5.5<br>(5.1-6.0) | 5.9<br>(5.5-6.5) | 6.3<br>(5.8-6.9) | 6.7<br>(6.2-7.2) | 6.7<br>(6.3-7.3) | 6.7<br>(6.3-7.3) |                  |
| Developing | 1945       | Male   |                  |                  |                  |                  |                  | 4.6<br>(4.2-5.1) | 5.3<br>(4.9-5.8) | 5.8<br>(5.3-6.4) | 6.4<br>(5.9-6.9) | 6.9<br>(6.4-7.4) | 7.3<br>(6.8-7.8) | 7.2<br>(6.7-7.8) |                  |                  |                  |
| Developing | 1950       | Male   |                  |                  |                  |                  |                  | 4.1<br>(3.7-4.5) | 4.8<br>(4.4-5.3) | 5.5<br>(5.1-6.0) | 6.1<br>(5.6-6.6) | 6.8<br>(6.3-7.3) | 7.3<br>(6.9-7.8) | 7.7<br>(7.2-8.3) |                  |                  |                  |
| Developing | 1955       | Male   |                  |                  |                  |                  | 3.5<br>(3.2-3.9) | 4.2<br>(3.8-4.6) | 4.8<br>(4.4-5.3) | 5.7<br>(5.2-6.2) | 6.4<br>(6.0-6.9) | 6.9<br>(6.5-7.4) | 7.6<br>(7.1-8.2) |                  |                  |                  |                  |
| Developing | 1960       | Male   |                  |                  |                  | 2.9<br>(2.6-3.2) | 3.8<br>(3.5-4.2) | 4.5<br>(4.1-5.0) | 5.3<br>(4.9-5.8) | 6.5<br>(6.0-7.0) | 7.3<br>(6.9-7.7) | 7.8<br>(7.3-8.3) |                  |                  |                  |                  |                  |
| Developing | 1965       | Male   |                  |                  | 2.4<br>(2.1-2.8) | 3.0<br>(2.7-3.3) | 4.0<br>(3.6-4.4) | 4.8<br>(4.3-5.2) | 5.8<br>(5.4-6.3) | 7.1<br>(6.6-7.5) | 7.9<br>(7.4-8.5) |                  |                  |                  |                  |                  |                  |
| Developing | 1970       | Male   |                  | 3.1<br>(2.7-3.6) | 2.6<br>(2.2-3.0) | 3.1<br>(2.8-3.4) | 4.2<br>(3.8-4.6) | 5.1<br>(4.7-5.5) | 6.5<br>(6.1-7.0) | 7.7<br>(7.2-8.2) |                  |                  |                  |                  |                  |                  |                  |
| Developing | 1975       | Male   | 4.1<br>(3.6-4.8) | 3.3<br>(2.9-3.7) | 2.7<br>(2.4-3.2) | 3.4<br>(3.1-3.8) | 4.7<br>(4.3-5.1) | 5.8<br>(5.4-6.2) | 7.4<br>(6.9-8.0) |                  |                  |                  |                  |                  |                  |                  |                  |
| Developing | 1980       | Male   | 4.4<br>(3.8-5.0) | 3.4<br>(3.1-3.9) | 2.9<br>(2.6-3.3) | 3.9<br>(3.6-4.3) | 5.4<br>(5.1-5.8) | 6.8<br>(6.3-7.3) |                  |                  |                  |                  |                  |                  |                  |                  |                  |
| Developing | 1985       | Male   | 4.6<br>(4.1-5.2) | 3.7<br>(3.3-4.1) | 3.1<br>(2.8-3.5) | 4.2<br>(3.9-4.6) | 6.0<br>(5.6-6.4) |                  |                  |                  |                  |                  |                  |                  |                  |                  |                  |
| Developing | 1990       | Male   | 5.1<br>(4.5-5.9) | 4.1<br>(3.6-4.7) | 3.3<br>(3.0-3.7) | 4.6<br>(4.2-5.0) |                  |                  |                  |                  |                  |                  |                  |                  |                  |                  |                  |
| Developing | 1995       | Male   | 5.3<br>(4.7-6.0) | 4.3<br>(3.9-4.8) | 3.5<br>(3.1-3.8) |                  |                  |                  |                  |                  |                  |                  |                  |                  |                  |                  |                  |

| Location   | Birth Year | Sex  | Age                  |                      |      |      |      |      |      |      |      |      |      |      |      |      |      |
|------------|------------|------|----------------------|----------------------|------|------|------|------|------|------|------|------|------|------|------|------|------|
|            |            |      | 7.5                  | 12.5                 | 17.5 | 22.5 | 27.5 | 32.5 | 37.5 | 42.5 | 47.5 | 52.5 | 57.5 | 62.5 | 67.5 | 72.5 | 77.5 |
| Developing | 2000       | Male | 5-3<br>(4-8-<br>5-9) | 4-4<br>(4-0-<br>4-9) |      |      |      |      |      |      |      |      |      |      |      |      |      |
| Developing | 2005       | Male | 5-4<br>(4-9-<br>5-9) |                      |      |      |      |      |      |      |      |      |      |      |      |      |      |
